# Supplementary material for: Directed functionalization of 1,2-dihydropyridines: stereoselective synthesis of 2,6-disubstituted piperidines
Source: Royal Society of Chemistry journal article supplement (doi:10.1039/c4cc02220c), 2014-01-01

## SUPPORTING INFORMATION

# Directed Functionalization of 1,2-Dihydropyridines: Stereoselective Synthesis of 2,6-Disubstituted Piperidines

Guillaume Pelletier, Léa Constantineau-Forget, and André B. Charette\*

*Department of Chemistry, Faculty of Arts and Sciences, Université de Montréal, P.O. Box 6128, Station Downtown, Québec, Canada H3C 3J7. E-Mail: [andre.charette@umontreal.ca](mailto:andre.charette@umontreal.ca)*

**Experimental procedures, characterization data,  $^1\text{H}$ ,  $^{13}\text{C}$ , and  $^{19}\text{F}$  for new compounds**

### **Table of Contents**

|                                                                                                                                                             |          |
|-------------------------------------------------------------------------------------------------------------------------------------------------------------|----------|
| <i>General information and reagents</i> .....                                                                                                               | S2-S3    |
| <i>Titration procedures</i> .....                                                                                                                           | S3       |
| <i>Optimization tables for the Negishi cross-coupling</i> .....                                                                                             | S4-S9    |
| <i>Experimental procedures and characterization data</i>                                                                                                    |          |
| <i>Dihydropyridine synthesis (1c-1d)</i> .....                                                                                                              | S10-S12  |
| <i>Directed lithiation/electrophilic quench (6a-6n)</i> .....                                                                                               | S13-S25  |
| <i>Directed lithiation/Negishi cross-coupling (6o-6y)</i> .....                                                                                             | S26-S32  |
| <i>Diastereoselective hydrogenation of 2,6-disubstituted dihydropyridines</i> .....                                                                         | S33-S36  |
| <i>Copy of <math>^1\text{H}</math>, <math>^{13}\text{C}</math>, and <math>^{19}\text{F}</math> of all characterized compounds and sel. nOe spectra</i> .... | S37-S125 |

## General Information

Unless otherwise stated, reactions were run under an argon atmosphere with rigid exclusion of moisture from reagents and glassware using standard techniques for manipulating air-sensitive compounds.<sup>1</sup> All glassware was flame-dried prior to use. THF and Et<sub>2</sub>O were obtained by filtration through drying columns on a filtration system. MeOH was distilled over prior to its use. Analytical thin-layer chromatography (TLC) was performed on precoated, glass-backed silica gel (Silicycle Glass Backed TLC Extra Hard Layer, 60 Å). Visualization of the developed chromatogram was performed by UV, aqueous potassium permanganate (KMnO<sub>4</sub>), ceric ammonium molybdate (CAM), or ninhydrin. Flash column chromatography were performed on an automatic purification system (Teledyne Isco Combiflash<sup>®</sup> Companion or Sq16x) or on a glass chromatography column support. Prepacked normal phase silica gel column was used for separation of products using Teledyne Isco RediSep<sup>®</sup> Rf High Performance Gold (Silica gel, Diol, Amine) or Grace Reveleris<sup>®</sup> High Performance. Melting points were obtained on a Büchi melting point apparatus and are uncorrected. Nuclear magnetic resonance spectra were recorded on an Avance AV700 MHz, Avance AV500 MHz, Avance AV400 MHz, Avance AV 300 MHz, or Avance DRX400 MHz (<sup>1</sup>H, <sup>13</sup>C, <sup>19</sup>F, DEPT 135, COSY, HMQC/HSQC) spectrometer. Chemical shifts for <sup>1</sup>H NMR spectra are recorded in parts per million from tetramethylsilane with the solvent resonance as the internal standard (chloroform, δ = 7.27 ppm). Data are reported as follows: chemical shift, multiplicity (s = singlet, d = doublet, t = triplet, q = quartet, qn = quintet, sx = sextet, h = heptet, m = multiplet, br = broad and app = apparent), coupling constant in Hz and integration. Chemical shifts for <sup>13</sup>C NMR spectra are recorded in parts per million from tetramethylsilane using the central peak of deuteriochloroform (δ = 77.23 ppm) as the internal standard. All <sup>13</sup>C NMR spectra were obtained with complete proton decoupling. Infrared spectra were taken on a Bruker Alpha Vertex Series ATR (neat) and are reported in reciprocal centimeters (cm<sup>-1</sup>). Optical rotations were determined with a Perkin-Elmer 341 polarimeter at 589 nm. Data are reported as follows: [α]<sup>λ</sup> temp, concentration (*c* in g/100 mL), and solvent. High resolution mass spectra were performed by the Centre régional de spectroscopie de masse de l'Université de Montréal.

## Reagents

**Reagents:** Unless otherwise stated, commercial reagents were used without purification. Trifluoromethanesulfonic (triflic) anhydride was distilled over phosphorus pentoxide and was stored for no more than five days before redistilling. Pyridine was distilled over sodium and kept under argon before use. All catalysts, ligands, and zinc salts were kept under argon in a glovebox before use. *n*-Butyl lithium, *sec*-butyl lithium, MeMgBr, EtMgBr, Ph(CH<sub>2</sub>)<sub>2</sub>MgCl and 4-(F)PhMgBr were titrated using standard techniques prior to their use (*see next section*). *n*-Butyllithium in hexanes (originally sold as a 2.5 M solution) was purchased from FMC Lithium. *Sec*-Butyllithium in cyclohexane (originally sold as a 1.37 M

---

1. Shriver, D. F.; Drezdson, M. A. *The Manipulation of Air-Sensitive Compounds*; 2<sup>nd</sup> Edition; Wiley: New York, 1986.

solution) was purchased from Strem Chemicals. Anhydrous zinc bromide was purchased from Alfa Aesar (98%) and was stored in a glovebox before use. Eschenmoser's salt was kept in a dry glovebox before use. The dihydropyridines **1a** and **1b** were prepared according to literature procedures.<sup>2</sup> The chiral amide used in the synthesis of dihydropyridines **1a-1d** was prepared according to literature procedures.<sup>2</sup> Ph(CH<sub>2</sub>)<sub>2</sub>MgCl was made according to literature procedures with Ph(CH<sub>2</sub>)<sub>2</sub>Cl, I<sub>2</sub> (cat.) and Mg turnings in Et<sub>2</sub>O.<sup>3</sup> The following reagents were purchased from commercial sources and used as received:

Zinc bromide (Alfa Aesar, 98%), palladium acetate (StremChem, 98%), PPh<sub>3</sub> (StremChem, 99%), 4-bromoanisole (Alfa Aesar, 99%), 3-bromotoluene (Aldrich, 98%), ethyl 4-bromobenzoate (Aldrich, 98%), 1-bromo-4-fluorobenzene (Oakwood Product, 99%), 4-bromobenzotrifluoride (Oakwood Products, 99%), 1-bromonaphthalene (Aldrich, 97%), 1-bromo-4-nitrobenzene (Aldrich, 99%), 4-bromobenzonitrile (Aldrich, 99%), 2-bromothiophene (Aldrich, 98%), ethyl *trans*-4-bromocinnamate (Alfa Aesar, 98%), *cis*-1-bromo-1-propene (Alfa Aesar, 98%), methyl iodide (Aldrich, 99%), 1-iodoundecane (Aldrich, 98%), 1-chloro-3-iodopropane (Aldrich, 99%), NFSI (Aldrich, 97%), NIS (Aldrich, 99%), NCS (Aldrich, 98%+), D<sub>2</sub>O (Cambridge Isotopes, 99%), bromotrimethylsilane (Alfa Aesar, 97%), Eschenmoser's salt (Aldrich, 98%), diphenyl disulfide (Alfa Aesar, 99%), Palladium on carbon, 10%wt dry (Aldrich), 4-(F)PhMgBr (Aldrich, 2.0 M in Et<sub>2</sub>O).

*N,N*-dimethylcarbamoyl chloride (Aldrich, 98%) and allyl bromide (Aldrich, 99%) were distilled prior to their use.

## Titration procedures

### *Titration of lithium and magnesium reagents*<sup>4</sup>

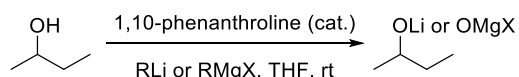

To an argon-flushed and flame-dried 10 mL round-bottom flask equipped with a teflon septum and a stirbar was added catalytic amount of 1,10-phenanthroline (2 to 5 mg). Then, it was solubilized with 1.0 mL of THF and stirred at room temperature. An accurately syringed volume of lithium or magnesium reagent was added to the 1,10-phenanthroline solution using a gas tight syringe (normally between 0.5 mL to 1.0 mL). A light purple color forms within a 5 minute range indicating the complexation of the 1,10-phenanthroline to the lithium/magnesium species. Then, a solution of anhydrous 2-butanol (1.0 M in anhydrous toluene) was slowly added dropwise *via* a gas tight syringe until the end point is reached indicated by a change in color to a yellow or translucent solution. The molarity of the lithium or magnesium reagent was averaged from a duplicate of the procedure.

2. A. B. Charette, M. Grenon, A. Lemire, M. Pourashraf, J. Martel *J. Am. Chem. Soc.* 2001, **123**, 11829.

3. Olah, G. A.; Arvanaghi, M. *Org. Synth.* 1986, **64**, 114.

4. The titration procedure for Grignard and organolithium reagents was reported previously: S. C. Watson, J. F. Eastham, *J. Organomet. Chem.* 1967, **9**, 165-168.

## Reaction optimization-

Optimization of the Negishi cross-coupling with **1a**: Initial trials and variation of the base

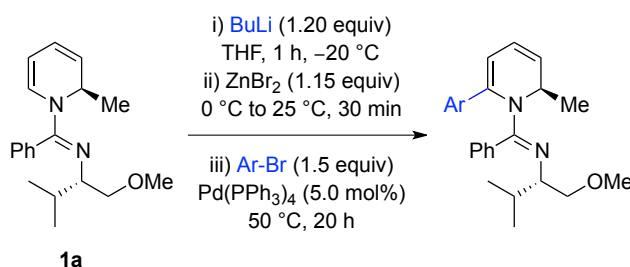

To a flame-dried 5 mL microwave glass reactor (Biotage® 2-5 mL vials) equipped with a magnetic stir bar was added (*E*)-*N*-[(2*S*)-1-methoxy-3-methylbutan-2-yl]-1-[(2*R*)-2-methylpyridin-1(2*H*)-yl]-1-phenylmethanimine<sup>5</sup> **1a** (298.2 mg, 1.0 mmol, 1.0 equiv) and the vial was capped with a 14 mm rubber septum. Then, the vial was purged with argon (10 min) and the dihydropyridine was diluted with anhydrous THF (4.0 mL, (0.25 M)). The reaction flask was then cooled to  $-20\text{ }^{\circ}\text{C}$  using a *i*-PrOH:H<sub>2</sub>O (1:1) cooling bath and *n*-BuLi or *sec*-BuLi (1.2 mmol, 1.0 equiv) was added dropwise to the reaction. The reaction was stirred at  $-20\text{ }^{\circ}\text{C}$  for 1 hour. The reaction turned gradually from a yellow solution to a red/brown solution over the course of the reaction. Then, the flask was opened and anhydrous ZnBr<sub>2</sub> (255.1 mg, 1.15 mmol, 1.15 equiv) was added rapidly to the reaction at  $-20\text{ }^{\circ}\text{C}$  and the vial was recapped rapidly. The reaction was slowly heated to  $25\text{ }^{\circ}\text{C}$  over the course of 30 min. The reaction returned gradually to a yellow solution and disappearing of the zinc precipitate was usually observed over the course of the reaction. Then, the cap was opened and Pd(PPh<sub>3</sub>)<sub>4</sub> (57.5 mg, 0.05 mmol, 0.05 equiv) was rapidly added and the vial was recapped. The arylbromide (1.5 mmol, 1.5 equiv) was added via syringe and the reaction was slowly heated to  $50\text{ }^{\circ}\text{C}$  using an oil bath and the reaction was stirred for 20 hours at  $50\text{ }^{\circ}\text{C}$ . The reaction was cooled to rt and decapped. A (1.0 M) solution of mesitylene in DCM was added to the reaction (120.2 mg, 1.0 mL of solution, 1.0 mmol, 1.0 equiv) and the reaction was quenched by addition of an aqueous saturated solution of sodium bicarbonate (NaHCO<sub>3</sub>) was added to the vial (2.0 mL). The biphasic solution was transferred to a 30 mL extraction funnel and DCM was added (~15 mL). The layers were separated and the aqueous layer was extracted with DCM (3x). The organic layers were combined, dried over Na<sub>2</sub>SO<sub>4</sub>, filtered over a sintered funnel, and evaporated to dryness. The conversion and yield for the 2,6-disubstituted dihydropyridine **6** was determined by <sup>1</sup>H NMR by comparing signals obtained from pure samples with mesitylene as the internal standard.

5. The 2-substituted dihydropyridine **1a** can easily discolor and decompose *via* oxidation if not stored properly under argon in a freezer. The dihydropyridine **1a** was periodically repurified by flash chromatography if partially decomposed prior to its use.

| entry | base             | Ar-Br                      | temp. (°C)  | yield (%)                     |
|-------|------------------|----------------------------|-------------|-------------------------------|
| 1     | <i>sec</i> -BuLi | 4-MeOPhBr                  | -20         | 51 <sup>a</sup> ( <b>6o</b> ) |
| 2     | <i>sec</i> -BuLi | 3-MePhBr                   | -20         | 67 <sup>a</sup> ( <b>6p</b> ) |
| 3     | <i>sec</i> -BuLi | 4-(EtO <sub>2</sub> C)PhBr | -20         | 75 <sup>a</sup> ( <b>6q</b> ) |
| 4     | <i>n</i> -BuLi   | 4-MeOPhBr                  | -20         | 30 <sup>b</sup> ( <b>6o</b> ) |
| 5     | <i>n</i> -BuLi   | 4-MeOPhBr                  | -10         | 36 <sup>b</sup> ( <b>6o</b> ) |
| 6     | <i>n</i> -BuLi   | 4-MeOPhBr                  | 0           | 40 <sup>b</sup> ( <b>6o</b> ) |
| 7     | <i>n</i> -BuLi   | 4-MeOPhBr                  | 25          | 21 <sup>b</sup> ( <b>6o</b> ) |
| 8     | <i>n</i> -BuLi   | 4-MeOPhBr                  | reflux (65) | 0 <sup>b</sup> ( <b>6o</b> )  |

<sup>a</sup> Isolated yield <sup>b</sup> Yield determined by <sup>1</sup>H NMR versus mesitylene as the internal standard

### Optimization of the Negishi cross-coupling with **1a**: Variation of the catalyst's nature

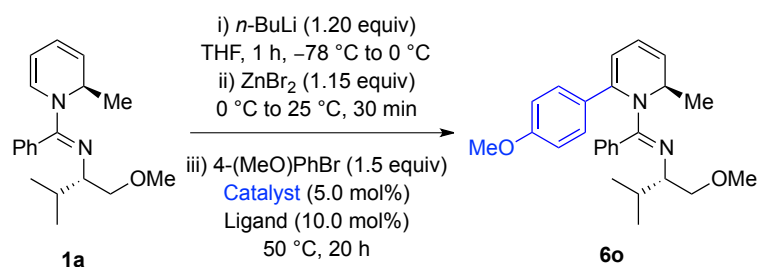

To a flame-dried 5 mL microwave glass reactor (Biotage® 2-5 mL vials) equipped with a magnetic stir bar was added (*E*)-*N*-[(2*S*)-1-methoxy-3-methylbutan-2-yl]-1-[(2*R*)-2-methylpyridin-1(2*H*)-yl]-1-phenylmethanimine<sup>5</sup> **1a** (298.2 mg, 1.0 mmol, 1.0 equiv) and the vial was capped with a 14 mm rubber septum. Then, the vial was purged with argon (10 min) and the dihydropyridine was diluted with anhydrous THF (4.0 mL, (0.25 M)). The reaction flask was then cooled to -78 °C using an acetone/dry ice cooling bath and *n*-BuLi (1.2 mmol, 1.0 equiv) was added dropwise to the reaction. The reaction was stirred from -78 °C to 0 °C for 1 hour. The reaction turned gradually from a yellow solution to a red/brown solution over the course of the reaction. Then, the flask was opened and anhydrous ZnBr<sub>2</sub> (255.1 mg, 1.15 mmol, 1.15 equiv) was added rapidly to the reaction at 0 °C and the vial was recapped rapidly. The reaction was slowly heated to 25 °C over the course of 30 min. The reaction returned gradually to a yellow solution and disappearing of the zinc precipitate was usually observed over the course of the reaction. Then, the cap was opened and the catalyst (0.05 mmol, 0.05 equiv) and the ligand (0.10 mmol, 0.10 equiv) were rapidly added and the vial was recapped. 4-Bromoanisole (280.5 mg, 1.5 mmol, 1.5 equiv) was added via syringe and the reaction was slowly heated to 50 °C using an oil bath and the reaction was stirred for 20 hours at 50 °C. The reaction was cooled to rt and decapped. A (1.0 M) solution of mesitylene in DCM was added to the reaction (120.2 mg, 1.0 mL of solution, 1.0 mmol, 1.0 equiv) and the reaction was quenched by addition of an aqueous saturated solution of sodium bicarbonate (NaHCO<sub>3</sub>)

was added to the vial (2.0 mL). The biphasic solution was transferred to a 30 mL extraction funnel and DCM was added (~15 mL). The layers were separated and the aqueous layer was extracted with DCM (3x). The organic layers were combined, dried over Na<sub>2</sub>SO<sub>4</sub>, filtered over a sintered funnel, and evaporated to dryness. The conversion and yield for the 2,6-disubstituted dihydropyridine **6o** was determined by <sup>1</sup>H NMR by comparing signals obtained from pure samples with mesitylene as the internal standard.

| entry | catalyst                                                 | Ligand           | conversion (%) <sup>a</sup> | yield <b>6o</b> (%) <sup>a</sup> |
|-------|----------------------------------------------------------|------------------|-----------------------------|----------------------------------|
| 1     | Pd(PPh <sub>3</sub> ) <sub>4</sub>                       | –                | 52                          | 40                               |
| 2     | Pd(OAc) <sub>2</sub>                                     | –                | 33                          | 0                                |
| 3     | Pd(dba) <sub>2</sub>                                     | –                | 25                          | 0                                |
| 4     | Pd(P( <i>t</i> -Bu) <sub>3</sub> ) <sub>2</sub>          | –                | 38                          | 0                                |
| 5     | PdCl <sub>2</sub> (dppf)•CH <sub>2</sub> Cl <sub>2</sub> | –                | 22                          | 0                                |
| 6     | Pd <sub>2</sub> (dba) <sub>3</sub>                       | –                | 19                          | 0                                |
| 7     | Ni(PPh <sub>3</sub> ) <sub>4</sub>                       | –                | 37                          | 0                                |
| 8     | PdCl <sub>2</sub> (allyl)                                | –                | 80                          | 0                                |
| 9     | Pd(OAc) <sub>2</sub> (PPh <sub>3</sub> ) <sub>2</sub>    | –                | 55                          | 45                               |
| 10    | Pd(dba) <sub>2</sub>                                     | PPh <sub>3</sub> | 43                          | 42                               |
| 11    | Pd <sub>2</sub> (dba) <sub>3</sub>                       | PPh <sub>3</sub> | 71                          | 33                               |
| 12    | Pd(OAc) <sub>2</sub>                                     | PPh <sub>3</sub> | 58                          | 50                               |
| 13    | PdBr <sub>2</sub>                                        | PPh <sub>3</sub> | 46                          | 0                                |

<sup>a</sup> Yield and conversion were determined by <sup>1</sup>H NMR versus mesitylene as the internal standard

### Optimization of the Negishi cross-coupling with **1a**: Variation of the solvent and temperature

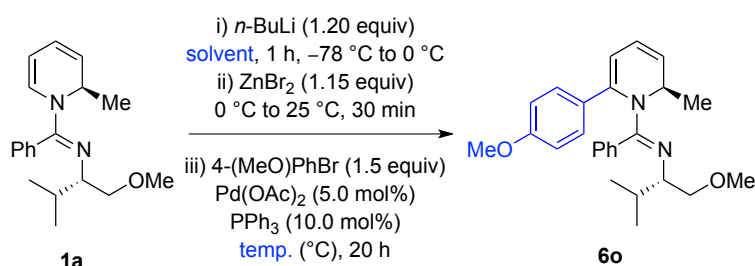

To a flame-dried 5 mL microwave glass reactor (Biotage® 2-5 mL vials) equipped with a magnetic stir bar was added (*E*)-*N*-[(2*S*)-1-methoxy-3-methylbutan-2-yl]-1-[(2*R*)-2-methylpyridin-1(2*H*)-yl]-1-phenylmethanimine<sup>5</sup> **1a** (298.2 mg, 1.0 mmol, 1.0 equiv) and the vial was capped with a 14 mm rubber septum. Then, the vial was purged with argon (10 min) and the dihydropyridine was diluted with anhydrous solvent (4.0 mL, (0.25 M)). The reaction flask was then cooled to -78 °C using an acetone/dry ice cooling bath and *n*-BuLi (1.2 mmol, 1.0 equiv) was added dropwise to the reaction. The reaction was stirred from -78 °C to 0 °C for 1 hour. The reaction turned gradually from a yellow solution to a

red/brown solution over the course of the reaction. Then, the flask was opened and anhydrous  $\text{ZnBr}_2$  (255.1 mg, 1.15 mmol, 1.15 equiv) was added rapidly to the reaction at 0 °C and the vial was recapped rapidly. The reaction was slowly heated to 25 °C over the course of 30 min. The reaction returned gradually to a yellow solution and disappearing of the zinc precipitate was usually observed over the course of the reaction. Then, the cap was opened and  $\text{Pd}(\text{OAc})_2$  (11.2 mg, 0.05 mmol, 0.05 equiv) as well as  $\text{PPh}_3$  (26.2 mg, 0.10 mmol, 0.10 equiv) were rapidly added and the vial was recapped. 4-Bromoanisole (280.5 mg, 188  $\mu\text{L}$ , 1.5 mmol, 1.5 equiv) was added via syringe and the reaction was slowly heated at the indicated temperature using an oil bath and the reaction was stirred for 20 hours. The reaction was cooled to rt and decapped. A (1.0 M) solution of mesitylene in DCM was added to the reaction (120.2 mg, 1.0 mL of solution, 1.0 mmol, 1.0 equiv) and the reaction was quenched by addition of an aqueous saturated solution of sodium bicarbonate ( $\text{NaHCO}_3$ ) was added to the vial (2.0 mL). The biphasic solution was transferred to a 30 mL extraction funnel and DCM was added (~15 mL). The layers were separated and the aqueous layer was extracted with DCM (3x). The organic layers were combined, dried over  $\text{Na}_2\text{SO}_4$ , filtered over a sintered funnel, and evaporated to dryness. The conversion and yield for the 2,6-disubstituted dihydropyridine **6o** was determined by  $^1\text{H}$  NMR by comparing signals obtained from pure samples with mesitylene as the internal standard.

| entry | solvent                  | temp. (°C) | conversion (%) <sup>a</sup> | yield <b>6o</b> (%) <sup>a</sup> |
|-------|--------------------------|------------|-----------------------------|----------------------------------|
| 1     | $\text{CH}_2\text{Cl}_2$ | 50         | 0                           | 0                                |
| 2     | Benzene                  | 50         | 0                           | 0                                |
| 3     | toluene                  | 50         | 0                           | 0                                |
| 4     | MeCN                     | 50         | 0                           | 0                                |
| 5     | $\text{Et}_2\text{O}$    | 50         | 30                          | 18                               |
| 6     | THF                      | 50         | 58                          | 50                               |
| 7     | THF                      | 60         | 66                          | 60                               |
| 8     | THF                      | 60         | 53                          | 28 <sup>b</sup>                  |
| 9     | THF                      | 75         | 81                          | 70                               |

<sup>a</sup> Yield and conversion were determined by  $^1\text{H}$  NMR versus mesitylene as the internal standard <sup>b</sup> TBAB (1.0 equiv) was added during the Negishi cross-coupling.

*Optimization of the Negishi cross-coupling with 1a: Variation of the catalyst amount, zinc source, aryl halide source and time of reaction*

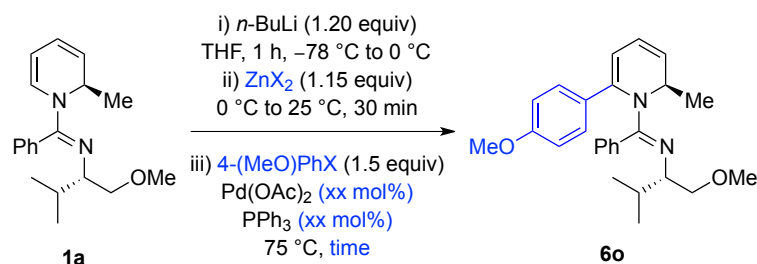

To a flame-dried 5 mL microwave glass reactor (Biotage® 2-5 mL vials) equipped with a magnetic stir bar was added (*E*)-*N*-[(2*S*)-1-methoxy-3-methylbutan-2-yl]-1-[(2*R*)-2-methylpyridin-1(2*H*)-yl]-1-phenylmethanimine<sup>5</sup> **1a** (298.2 mg, 1.0 mmol, 1.0 equiv) and the vial was capped with a 14 mm rubber septum. Then, the vial was purged with argon (10 min) and the dihydropyridine was diluted with anhydrous THF (4.0 mL, (0.25 M)). The reaction flask was then cooled to  $-78\text{ }^{\circ}\text{C}$  using an acetone/dry ice cooling bath and *n*-BuLi (1.2 mmol, 1.0 equiv) was added dropwise to the reaction. The reaction was stirred from  $-78\text{ }^{\circ}\text{C}$  to  $0\text{ }^{\circ}\text{C}$  for 1 hour. The reaction turned gradually from a yellow solution to a red/brown solution over the course of the reaction. Then, the flask was opened and anhydrous Zinc source (1.15 mmol, 1.15 equiv) was added rapidly to the reaction at  $0\text{ }^{\circ}\text{C}$  and the vial was recapped rapidly. The reaction was slowly heated to  $25\text{ }^{\circ}\text{C}$  over the course of 30 min. The reaction returned gradually to a yellow solution and disappearing of the zinc precipitate was usually observed over the course of the reaction. Then, the cap was opened and  $\text{Pd(OAc)}_2$  (x.xx mmol, x.xx equiv) as well as  $\text{PPh}_3$  (x.xx mmol, x.xx equiv) were rapidly added and the vial was recapped. 4-Haloanisole (1.5 mmol, 1.5 equiv) was added via syringe and the reaction was slowly heated at  $75\text{ }^{\circ}\text{C}$  using an oil bath and the reaction was stirred for the indicated amount of time. The reaction was cooled to rt and decapped. A (1.0 M) solution of mesitylene in DCM was added to the reaction (120.2 mg, 1.0 mL of solution, 1.0 mmol, 1.0 equiv) and the reaction was quenched by addition of an aqueous saturated solution of sodium bicarbonate ( $\text{NaHCO}_3$ ) was added to the vial (2.0 mL). The biphasic solution was transferred to a 30 mL extraction funnel and DCM was added ( $\sim 15\text{ mL}$ ). The layers were separated and the aqueous layer was extracted with DCM (3x). The organic layers were combined, dried over  $\text{Na}_2\text{SO}_4$ , filtered over a sintered funnel, and evaporated to dryness. The conversion and yield for the 2,6-disubstituted dihydropyridine **6o** was determined by  $^1\text{H}$  NMR by comparing signals obtained from pure samples with mesitylene as the internal standard.



| entry    | Pd(OAc) <sub>2</sub> /PPh <sub>3</sub><br>(mol%) | ZnX <sub>2</sub>        | 4-MeOPhX         | time (h)  | yield <b>6o</b> (%) <sup>a</sup> |
|----------|--------------------------------------------------|-------------------------|------------------|-----------|----------------------------------|
| 1        | 5.0/10.0                                         | ZnBr <sub>2</sub>       | 4-MeOPhBr        | 20        | 70                               |
| 2        | 10.0/20.0                                        | ZnBr <sub>2</sub>       | 4-MeOPhBr        | 20        | 73                               |
| <b>3</b> | <b>2.5/5.0</b>                                   | <b>ZnBr<sub>2</sub></b> | <b>4-MeOPhBr</b> | <b>20</b> | <b>68</b>                        |
| 4        | 2.5/5.0                                          | ZnCl <sub>2</sub>       | 4-MeOPhBr        | 20        | 51                               |
| 5        | 2.5/5.0                                          | ZnI <sub>2</sub>        | 4-MeOPhBr        | 20        | 18                               |
| 6        | 2.5/5.0                                          | Zn(OAc) <sub>2</sub>    | 4-MeOPhBr        | 20        | 35                               |
| 7        | 2.5/5.0                                          | ZnBr <sub>2</sub>       | 4-MeOPhCl        | 20        | 35                               |
| 8        | 2.5/5.0                                          | ZnBr <sub>2</sub>       | 4-MeOPhI         | 20        | 18                               |
| 9        | 2.5/5.0                                          | ZnBr <sub>2</sub>       | 4-MeOPhBr        | 4         | 65                               |
| 10       | 2.5/5.0                                          | ZnBr <sub>2</sub>       | 4-MeOPhBr        | 2.5       | 49                               |

<sup>a</sup> Yield and conversion were determined by <sup>1</sup>H NMR versus mesitylene as the internal standard

## Dihydropyridine synthesis (1c-1d)

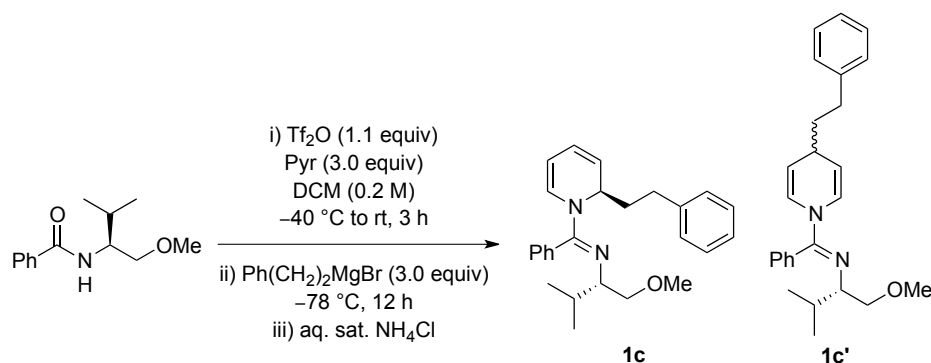

**N-[(R)-2-Phenethyl-2H-pyridin-1-yl]-N-[(S)-2-(1-methoxy-3-methylbutyl)]-benzamidine (1c).** (S)-N-[2-(1-methoxy-3-methylbutyl)]-benzamide (885 mg, 4.0 mmol) was added to a 50 mL round-bottomed flask, previously dried and flushed with nitrogen. Dichloromethane (20.0 mL, 0.2 M) and pyridine (0.949 g, 0.967 mL, 12.0 mmol, 3.0 equiv) were then added and the resulting solution was cooled to -40 °C. Triflic anhydride (1.241 g, 0.730 mL, 4.4 mmol, 1.1 mmol) was then slowly added along the side of the flask. The reaction was left to warm up to 0 °C over two hours, during which a pale yellow color appeared. The reaction was then stirred for one hour at room temperature to ensure complete formation of the pyridinium intermediate. The solution containing the pyridinium intermediate was cooled to -78 °C and phenethylmagnesium chloride<sup>3</sup> (8.0 mL of a 1.50 M solution in ether, 12.0 mmol, 3.0 equiv) was added dropwise to the solution while maintaining the internal temperature below -75 °C with an internal monitor. The reaction was stirred at -78 °C until TLC analysis showed complete consumption of the starting material (~7 hrs/over-night). Temperature was maintained with a cryostat cooling apparatus over reaction time. The reaction was quenched by adding a saturated aqueous solution of NaHCO<sub>3</sub> and left to warm to room temperature. The mixture was then transferred to an extraction funnel and the aqueous phase was extracted twice with EtOAc. The organic phases were then combined, dried with Na<sub>2</sub>SO<sub>4</sub>, filtered and concentrated under reduced pressure. Analysis of the crude mixture by <sup>1</sup>H NMR showed a ratio of 83% of **1c** along with 17% of 1,4-adduct **1c'** and >95:5 d.r for **1c**. Flash chromatography of the oily residue with a gradient of 100% Hexanes to 30% EtOAc/Hexanes with a Isco 120g silica gel column resulted in a yellow oil consisting of pure 1,2-adduct **1c** (670 mg, 43 % Yield) along with 1,4-adduct (150 mg, 10% Yield).

For 1,2-adduct **1c** (major)  $R_f = 0.7$  (20% EtOAc/hexanes);  $[\alpha]_D^{25} = -648.5$  ( $c = 0.60$ , CHCl<sub>3</sub>); <sup>1</sup>H NMR (300 MHz, CDCl<sub>3</sub>) δ 7.46-7.37 (m, 3H), 7.32-7.25 (m, 5H), 7.22-7.17 (m, 1H), 7.14-7.08 (m, 1H), 6.00-5.89 (br m, 1H), 5.97 (dd,  $J = 6.0, 7.0$  Hz, 1H), 5.60-5.55 (m, 1H), 5.53-5.39 (br m, 1H), 4.86 (app t,  $J = 5.0$  Hz, 1H), 3.48 (dd,  $J = 4.0, 7.0$  Hz, 1H), 3.33 (dd,  $J = 5.5, 7.0$  Hz, 1H), 3.28 (s, 3H), 3.01-2.97 (m, 1H), 2.82-2.97 (m, 2H), 2.18-2.09 (m, 1H), 1.98-1.90 (m, 1H), 1.71-1.63 (m, 1H), 0.83 (d,  $J = 5.0$  Hz, 3H), 0.72 (d,  $J = 5.0$  Hz, 3H); <sup>13</sup>C NMR (100 MHz, CDCl<sub>3</sub>): δ 157.0, 142.8, 133.1, 129.5, 129.0, 128.9, 128.5, 128.4, 128.2, 125.5, 122.3, 119.8, 100.9, 76.0, 63.4, 59.0, 51.6, 34.5, 30.8 (2), 20.0, 17.6; FTIR

(neat) ( $\text{cm}^{-1}$ ) 3026, 2956, 2925, 1626, 1599, 1562, 1389, 1333, 1264; **HRMS** (ESI) calcd for  $\text{C}_{26}\text{H}_{33}\text{N}_2\text{O}$   $[\text{M}+\text{H}]^+$ : 389.2587, found 389.2587.

For 1,4-adduct **1c'** (minor):  $R_f = 0.90$  (20% EtOAc/hexanes);  $[\alpha]_D^{25} = -96.9$  ( $c$  0.425,  $\text{CHCl}_3$ );  **$^1\text{H NMR}$**  (400 MHz,  $\text{CDCl}_3$ )  $\delta$  7.46-7.39 (m, 3H), 7.31-7.17 (m, 7H), 6.83-6.53 (br m, 2H), 4.72-4.61 (br m, 2H), 3.44 (dd,  $J = 5.0, 9.5$  Hz, 1H), 3.34 (dd,  $J = 7.5, 9.5$  Hz, 1H), 3.28 (s, 3H), 3.15-3.09 (m, 1H), 3.03-2.98 (m, 1H), 2.70-2.66 (m, 2H), 1.76-1.70 (m, 3H), 0.87 (d,  $J = 7.0$  Hz, 3H), 0.76 (d,  $J = 7.0$  Hz, 3H);  **$^{13}\text{C NMR}$**  (100 MHz,  $\text{CDCl}_3$ ):  $\delta$  154.9, 149.7, 142.8, 132.4, 128.8, 128.6, 128.5, 128.3, 125.6, 125.3, 106.6, 75.8, 63.6, 59.0, 40.9, 33.2, 32.1, 31.0, 19.9, 17.9; **FTIR** (neat) ( $\text{cm}^{-1}$ ) 2957, 2925, 2889, 1681, 1638, 1613, 1580, 1561, 1520, 1493, 1453, 1417, 1372; **HRMS** (ESI) calcd for  $\text{C}_{26}\text{H}_{33}\text{N}_2\text{O}$   $[\text{M}+\text{H}]^+$ : 389.2587, found 389.2588.

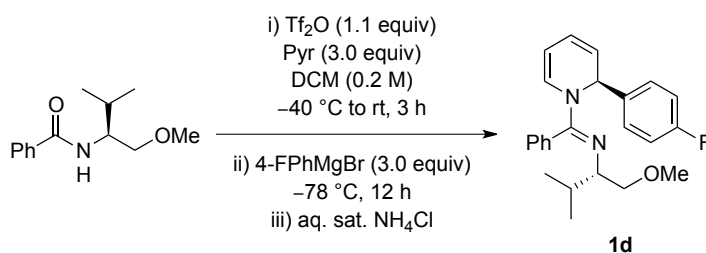

***N*-[(*R*)-2-(4-Fluorophenyl)-2*H*-pyridin-1-yl]-*N*-[(*S*)-2-(1-methoxy-3-methylbutyl)]-**

**benzamide (1d).** (*S*)-*N*-[2-(1-methoxy-3-methylbutyl)]-benzamide (1.327 g, 6.0 mmol, 1.0 equiv) was added to a 125 mL round-bottomed flask, previously dried and flushed with nitrogen. Dichloromethane (30.0 mL, 0.2 M) and pyridine (1.423 g, 1.45 mL, 18.0 mmol, 3.0 equiv) were then added and the resulting solution was cooled to  $-40$  °C. Triflic anhydride (1.862 g, 1.095 mL, 6.6 mmol, 1.1 mmol) was then slowly added along the side of the flask. The reaction was left to warm up to  $0$  °C over two hours, during which a pale yellow color appeared. The reaction was then stirred for one hour at room temperature to ensure complete formation of the pyridinium intermediate. The solution containing the pyridinium intermediate was cooled to  $-78$  °C and 4-fluorophenylmagnesium bromide (16.82 mL of a 1.07 M solution in ether, 18.0 mmol, 3.0 equiv) was added dropwise to the solution while maintaining the internal temperature below  $-75$  °C with an internal monitor. The reaction was stirred at  $-78$  °C until TLC analysis showed complete consumption of the starting material ( $\sim 7$  hrs/over night). Temperature was maintained with a cryostat cooling apparatus over reaction time. The reaction was quenched by adding a saturated aqueous solution of  $\text{NaHCO}_3$  and left to warm to room temperature. The mixture was then transferred to an extraction funnel and the aqueous phase was extracted twice with EtOAc. The organic phases were then combined, dried with  $\text{Na}_2\text{SO}_4$ , filtered and concentrated under reduced pressure. Analysis of the crude mixture by  $^1\text{H NMR}$  showed a ratio of 89% of **1d** along with 11% of 1,4-adduct and  $>95:5$  d.r. for **1d**. Flash chromatography of the oily residue with a gradient of 100% Hexanes to 30% EtOAc/Hexanes with a Isco 120g silica gel column resulted in a yellow oil consisting of pure 1,2-adduct **1d** (1.771 g, 78% Yield).  $R_f = 0.7$  (10% EtOAc/hexanes);  $[\alpha]_D^{20} = -721.4$  ( $c = 0.78$ ,  $\text{CHCl}_3$ );  **$^1\text{H NMR}$**  (300 MHz,  $\text{CDCl}_3$ ):  $\delta$  7.52 (dd,  $J = 5.5, 9.0$  Hz, 2H), 7.43-7.37 (m, 3H), 7.12 (br s, 2H), 6.98 (app t,  $J = 7.5$  Hz, 2H), 6.47

(br d,  $J = 5.5$  Hz, 1H), 6.04-5.99 (m, 2H), 5.61 (dd,  $J = 6.0$  Hz, 1H), 4.90-4.86 (m, 1H), 3.33 (dd,  $J = 4.5, 9.0$  Hz, 1H), 3.07 (s, 3H), 3.03 (dd,  $J = 7.5, 9.0$  Hz, 1H), 2.96-2.91 (m, 1H), 1.73-1.62 (m, 1H), 0.88 (d,  $J = 6.5$  Hz, 3H), 0.74 (d,  $J = 6.5$  Hz, 3H);  **$^{13}\text{C}$  NMR** (75 MHz,  $\text{CDCl}_3$ ):  $\delta$  158.5 (d,  $J = 260.0$  Hz,  $J_{\text{C-F}}$ ), 156.8, 139.6 (d,  $J = 3.0$  Hz,  $J_{\text{C-F}}$ ), 132.7, 129.2 (d,  $J = 44.5$  Hz,  $J_{\text{C-F}}$ ), 128.8, 128.7, 128.6, 128.5, 121.5, 120.4, 114.5 (d,  $J = 21$  Hz,  $J_{\text{C-F}}$ ), 100.2, 75.6, 63.6, 58.7, 54.7, 30.5, 20.0, 12.6;  **$^{19}\text{F}$  NMR** (288 MHz,  $\text{CDCl}_3$ ):  $\delta$  -117.0; **FTIR** (neat) ( $\text{cm}^{-1}$ ) 2957, 2923, 2881, 1627, 1599, 1570, 1507, 1467, 1445; **HRMS** (ESI) calcd for  $\text{C}_{24}\text{H}_{28}\text{N}_2\text{OF}$   $[\text{M}+\text{H}]^+$ : 379.2186, found 379.2179.

**Directed lithiation/electrophilic quench (6a-6n)**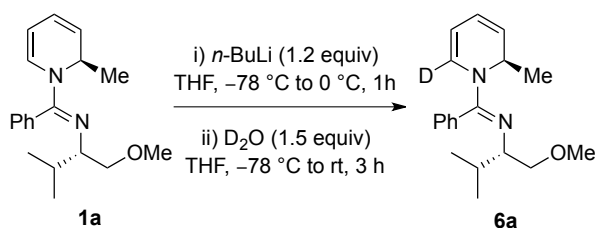

***N*-[(*R*)-2-methyl-2*H*-pyridin-1-yl]-*N*-[(*S*)-2-(1-methoxy-3-methylbutyl)]-benzamidinium-6-deuteride (**6a**):** To a flame-dried 5 mL microwave glass reactor (Biotage® 2-5 mL vials) equipped with a magnetic stir bar was added (*E*)-*N*-[(2*S*)-1-methoxy-3-methylbutan-2-yl]-1-[(2*R*)-2-methylpyridin-1(2*H*)-yl]-1-phenylmethanimine<sup>2</sup> (**1a**) (298.2 mg, 1.0 mmol, 1.0 equiv) and the vial was capped with a 14 mm rubber septum. Then, the vial was purged with argon (10 min) and the dihydropyridine was diluted with anhydrous THF (4.0 mL, 0.25 M). The reaction flask was then cooled to  $-78\text{ }^{\circ}\text{C}$  using an acetone/dry ice cooling bath and a solution of *n*-BuLi in hexanes (1.2 mmol, 1.2 equiv) was added dropwise to the reaction. The reaction was stirred from  $-78\text{ }^{\circ}\text{C}$  to  $0\text{ }^{\circ}\text{C}$  over the course of 1 hour. The reaction turned gradually from a yellow solution to a red/brown solution over the course of the reaction. The reaction was then cooled again to  $-78\text{ }^{\circ}\text{C}$ . In a separate 10 mL flame-dried round bottom flask equipped with a magnetic stirbar was added D<sub>2</sub>O (30.0 mg, 30  $\mu\text{L}$ , 1.5 mmol, 1.5 equiv). D<sub>2</sub>O was diluted with anhydrous THF (1.0 mL, 1.0 M) and the solution was transferred to the reaction dropwise at  $-78\text{ }^{\circ}\text{C}$ . The flask was rinsed with anhydrous THF (0.5 mL, 2.0 M) and the solvent was transferred to the reaction. The reaction was slowly heated to room temperature over the course of 3 hours. The reaction was then quenched by addition of a saturated solution of sodium bicarbonate (NaHCO<sub>3</sub>) (1.0 mL). The biphasic solution was transferred to a 30 mL extraction funnel and DCM was added ( $\sim 15\text{ mL}$ ). The layers were separated and the aqueous layer was extracted with DCM (3x). The organic layers were combined, dried over Na<sub>2</sub>SO<sub>4</sub>, filtered over a sintered funnel, and evaporated to dryness. The oily residue was then directly flashed using a gradient of 100% Hexanes to 70% EtOAc in hexanes over a 24 g Isco Gold column using 35 mL/min flow, and injecting the crude on a silica gel precolumn pad. The column was pre-equilibrated with 100% Hexanes. The fractions containing pure product were combined and concentrated. The product (**6a**) was recuperated as a yellow oil (288 mg, 96% Yield, >95% D incorporation). **R<sub>f</sub>**: 0.80 (30% EtOAc in Hexanes); [ $\alpha$ ]<sub>D</sub><sup>25</sup>:  $-495.3$  ( $c = 0.75$ , CHCl<sub>3</sub>); **<sup>1</sup>H NMR** (CDCl<sub>3</sub>, 400 MHz):  $\delta$  7.46-7.36 (m, 3H), 7.33-7.27 (m, 1H), 7.17-7.09 (m, 1H), 5.88 (dd,  $J = 5.0, 9.0\text{ Hz}$ , 1H), 5.48 (ddd,  $J = 1.0, 5.5, 9.0\text{ Hz}$ , 1H), 5.43-5.32 (br m, 1H), 4.85 (d,  $J = 5.0\text{ Hz}$ , 1H), 3.50 (dd,  $J = 5.0, 9.5\text{ Hz}$ , 1H), 3.35 (dd,  $J = 7.5, 9.5\text{ Hz}$ , 1H), 3.31 (s, 3H), 3.00-2.95 (m, 1H), 1.72-1.64 (m, 1H), 1.20 (d,  $J = 6.5\text{ Hz}$ , 3H), 0.84 (d,  $J = 7.0\text{ Hz}$ , 3H), 0.72 (d,  $J = 7.0\text{ Hz}$ , 3H); **<sup>13</sup>C NMR** (CDCl<sub>3</sub>, 75 MHz):  $\delta$  156.8, 133.2, 129.0, 128.5, 128.4, 121.7, 121.2, 100.4, 76.0, 63.6, 59.0, 48.2, 30.8, 20.0, 17.8, 17.7; **FTIR** (cm<sup>-1</sup>) (neat): 2959, 2923, 2886, 1625, 1555, 1410, 1386; **HRMS** (ESI, Pos): calcd for C<sub>19</sub>H<sub>26</sub>N<sub>2</sub>OD [ $M+H$ ]<sup>+</sup>: 300.2185  $m/z$ , found: 300.2185  $m/z$ .

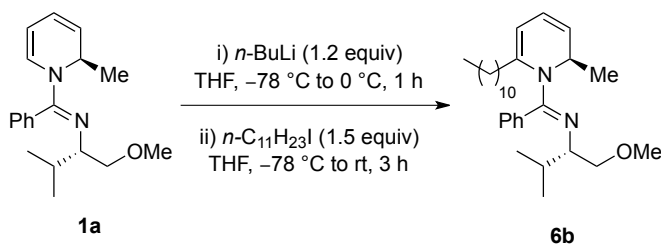

**(S,E)-1-Methoxy-3-methyl-N-(((R)-2-methyl-6-undecylpyridin-1(2H)-yl)(phenyl)methyl)butan-2-amine (6b):** To a flame-dried 5 mL microwave glass reactor (Biotage® 2-5 mL vials) equipped with a magnetic stir bar was added (*E*)-*N*-[(2*S*)-1-methoxy-3-methylbutan-2-yl]-1-[(2*R*)-2-methylpyridin-1(2*H*)-yl]-1-phenylmethanimine<sup>2</sup> (**1a**) (298.2 mg, 1.0 mmol, 1.0 equiv) and the vial was capped with a 14 mm rubber septum. Then, the vial was purged with argon (10 min) and the dihydropyridine was diluted with anhydrous THF (4.0 mL, 0.25 M). The reaction flask was then cooled to  $-78\text{ }^{\circ}\text{C}$  using an acetone/dry ice cooling bath and a solution of *n*-BuLi in hexanes (1.2 mmol, 1.2 equiv) was added dropwise to the reaction. The reaction was stirred from  $-78\text{ }^{\circ}\text{C}$  to  $0\text{ }^{\circ}\text{C}$  over the course of 1 hour. The reaction turned gradually from a yellow solution to a red/brown solution over the course of the reaction. In a separate 10 mL flame-dried round bottom flask equipped with a magnetic stirbar was added 1-iodoundecane (424 mg, 350  $\mu\text{L}$ , 1.5 mmol, 1.5 equiv). The iodide was diluted with anhydrous THF (1.0 mL, 1.0 M) and the solution was transferred to the reaction dropwise at  $-78\text{ }^{\circ}\text{C}$ . The flask was rinsed with anhydrous THF (0.5 mL, 2.0 M) and the solvent was transferred to the reaction. The reaction was slowly heated to room temperature over the course of 3 hours. The reaction was then quenched by addition of a saturated solution of sodium bicarbonate ( $\text{NaHCO}_3$ ) (1.0 mL). The biphasic solution was transferred to a 30 mL extraction funnel and DCM was added ( $\sim 15\text{ mL}$ ). The layers were separated and the aqueous layer was extracted with DCM (3x). The organic layers were combined, dried over  $\text{Na}_2\text{SO}_4$ , filtered over a sintered funnel, and evaporated to dryness. The oily residue was then directly flashed using a gradient of 100% Hexanes to 80% EtOAc in hexanes over a 40 g Isco Gold column using 45 mL/min flow, and injecting the crude on a silica gel precolumn pad. The column was pre-equilibrated with 100% Hexanes. The fractions containing pure product were combined and concentrated. The product (**6b**) was recuperated as a translucent oil (323 mg, 72% Yield).  $R_f$ : 0.90 (10% EtOAc in Hexanes);  $[\alpha]_D^{25}$ :  $-309.5$  ( $c = 0.79$ ,  $\text{CHCl}_3$ );  $^1\text{H NMR}$  ( $\text{CDCl}_3$ , 400 MHz):  $\delta$  7.42-7.25 (m, 5H), 5.91 (dd,  $J = 4.5, 9.0\text{ Hz}$ , 1H), 5.55 (dd,  $J = 5.5, 9.0\text{ Hz}$ , 1H), 5.33 (d,  $J = 4.5\text{ Hz}$ , 1H), 4.83-4.76 (m, 1H), 3.64 (dd,  $J = 5.0, 9.5\text{ Hz}$ , 1H), 3.49 (app t,  $J = 7.5\text{ Hz}$ , 1H), 3.41 (s, 3H), 3.31-3.25 (m, 1H), 1.88-1.79 (m, 1H), 1.78-1.71 (m, 1H), 1.70-1.61 (m, 1H), 1.48-1.39 (m, 1H), 1.36-1.10 (m, 17H), 1.04 (d,  $J = 6.5\text{ Hz}$ , 3H), 0.91 (t,  $J = 6.5\text{ Hz}$ , 3H), 0.80 (d,  $J = 7.0\text{ Hz}$ , 3H), 0.63 (d,  $J = 7.0\text{ Hz}$ , 3H);  $^{13}\text{C NMR}$  ( $\text{CDCl}_3$ , 75 MHz):  $\delta$  158.7, 140.5, 133.9, 128.9, 128.3, 127.7, 122.3, 121.3, 108.2, 75.9, 63.4, 58.9, 50.3, 34.6, 31.6, 31.1, 29.3, 29.2 (2), 29.1, 29.0, 28.9, 27.3, 22.3, 19.5, 17.1, 17.0, 13.8; **FTIR** ( $\text{cm}^{-1}$ ) (neat): 2956, 2922, 2853, 1616, 1598, 1597, 1446, 1409, 1383, 1227; **HRMS** (ESI, Pos): calcd for  $\text{C}_{30}\text{H}_{49}\text{N}_2\text{O}$   $[\text{M}+\text{H}]^+$ : 453.3839  $m/z$ , found: 453.3849  $m/z$ .

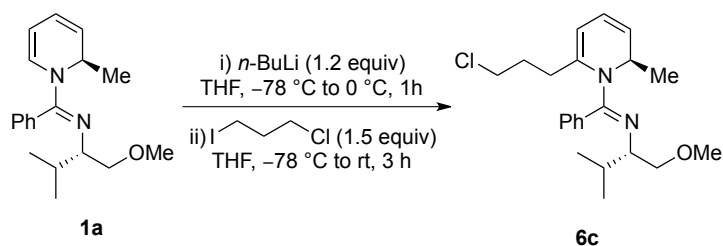

**(*S,E*)-*N*-(((*R*)-6-(3-Chloropropyl)-2-methylpyridin-1(2*H*)-yl)(phenyl)methylene)-1-methoxy-3-methylbutan-2-amine (**6c**):**

To a flame-dried 5 mL microwave glass reactor (Biotage® 2-5 mL vials) equipped with a magnetic stir bar was added (*E*)-*N*-[(2*S*)-1-methoxy-3-methylbutan-2-yl]-1-[(2*R*)-2-methylpyridin-1(2*H*)-yl]-1-phenylmethanimine<sup>2</sup> (**1a**) (298.2 mg, 1.0 mmol, 1.0 equiv) and the vial was capped with a 14 mm rubber septum. Then, the vial was purged with argon (10 min) and the dihydropyridine was diluted with anhydrous THF (4.0 mL, 0.25 M). The reaction flask was then cooled to  $-78$  °C using an acetone/dry ice cooling bath and a solution of *n*-BuLi in hexanes (1.2 mmol, 1.2 equiv) was added dropwise to the reaction. The reaction was stirred from  $-78$  °C to 0 °C over the course of 1 hour. The reaction turned gradually from a yellow solution to a red/brown solution over the course of the reaction. In a separate 10 mL flame-dried round bottom flask equipped with a magnetic stirbar was added 1-chloro-3-iodopropane (306.7 mg, 161  $\mu$ L, 1.5 mmol, 1.5 equiv). The iodide was diluted with anhydrous THF (1.0 mL, 1.0 M) and the solution was transferred to the reaction dropwise at  $-78$  °C. The flask was rinsed with anhydrous THF (0.5 mL, 2.0 M) and the solvent was transferred to the reaction. The reaction was slowly heated to room temperature over the course of 3 hours. The reaction was then quenched by addition of a saturated solution of sodium bicarbonate ( $\text{NaHCO}_3$ ) (1.0 mL). The biphasic solution was transferred to a 30 mL extraction funnel and DCM was added ( $\sim$ 15 mL). The layers were separated and the aqueous layer was extracted with DCM (3x). The organic layers were combined, dried over  $\text{Na}_2\text{SO}_4$ , filtered over a sintered funnel, and evaporated to dryness. The oily residue was then directly flashed using a gradient of 100% Hexanes to 80% EtOAc in hexanes over a 40 g Isco Gold column using 45 mL/min flow, and injecting the crude on a silica gel precolumn pad. The column was pre-equilibrated with 100% Hexanes. The fractions containing pure product were combined and concentrated. The product (**6c**) was recuperated as a translucent oil (278 mg, 75% Yield).  $R_f$ : 0.80 (20% EtOAc in Hexanes);  $[\alpha]_D^{25}$ :  $-666.7$  ( $c = 0.75$ ,  $\text{CHCl}_3$ );  $^1\text{H NMR}$  ( $\text{CDCl}_3$ , 400 MHz):  $\delta$  7.43-7.30 (m, 5H), 5.92 (dd,  $J = 5.0, 9.0$  Hz, 1H), 5.57 (dd,  $J = 6.0, 9.0$  Hz, 1H), 5.39 (d,  $J = 5.0$  Hz, 1H), 4.79-4.72 (m, 1H), 3.63 (dd,  $J = 5.0, 9.5$  Hz, 1H), 3.50-3.41 (m, 3H), 3.40 (s, 3H), 3.27 (dt,  $J = 5.0, 8.0$  Hz, 1H), 2.04-1.85 (m, 3H), 1.82-1.74 (m, 1H), 1.70-1.61 (m, 1H), 1.04 (d,  $J = 6.5$  Hz, 3H), 0.79 (d,  $J = 7.0$  Hz, 3H), 0.64 (d,  $J = 7.0$  Hz, 3H);  $^{13}\text{C NMR}$  ( $\text{CDCl}_3$ , 75 MHz):  $\delta$  158.7, 138.5, 133.6, 128.8, 128.5, 127.9, 122.9, 121.2, 109.2, 75.7, 63.5, 58.9, 50.4, 44.0, 31.7, 31.1, 30.4, 19.5, 17.3, 17.2; **FTIR** ( $\text{cm}^{-1}$ ) (neat): 2958, 2923, 2872, 1615, 1597, 1567, 1445, 1409, 1313; **HRMS** (ESI, Pos): calcd for  $\text{C}_{22}\text{H}_{32}\text{N}_2\text{OCl}$   $[\text{M}+\text{H}]^+$ : 375.2203  $m/z$ , found: 375.2207  $m/z$ .

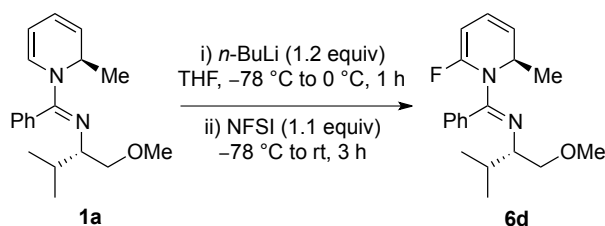

**(S,E)-N-(((R)-6-fluoro-2-methylpyridin-1(2H)-yl)(phenyl)methylene)-1-methoxy-3-**

**methylbutan-2-amine (6d):** To a flame-dried 5 mL microwave glass reactor (Biotage® 2-5 mL vials) equipped with a magnetic stir bar was added (*E*)-*N*-[[(2*S*)-1-methoxy-3-methylbutan-2-yl]-1-[(2*R*)-2-methylpyridin-1(2*H*)-yl]-1-phenylmethanimine<sup>2</sup> (**1a**) (298.2 mg, 1.0 mmol, 1.0 equiv) and the vial was capped with a 14 mm rubber septum. Then, the vial was purged with argon (10 min) and the dihydropyridine was diluted with anhydrous THF (4.0 mL, 0.25 M). The reaction flask was then cooled to  $-78\text{ }^\circ\text{C}$  using an acetone/dry ice cooling bath and a solution of *n*-BuLi in hexanes (1.2 mmol, 1.2 equiv) was added dropwise to the reaction. The reaction was stirred from  $-78\text{ }^\circ\text{C}$  to  $0\text{ }^\circ\text{C}$  over the course of 1 hour. The reaction turned gradually from a yellow solution to a red/brown solution over the course of the reaction. The reaction was then cooled again to  $-78\text{ }^\circ\text{C}$ . Solid *N*-fluorobenzenesulfonimine (NFSI) (346.8 mg, 1.1 mmol, 1.1 equiv) was transferred to the reaction rapidly. The reaction was slowly heated to room temperature over the course of 3 hours. The reaction was then quenched by addition of a saturated solution of sodium bicarbonate ( $\text{NaHCO}_3$ ) (1.0 mL). The biphasic solution was transferred to a 30 mL extraction funnel and DCM was added ( $\sim 15$  mL). The layers were separated and the aqueous layer was extracted with DCM (3x). The organic layers were combined, dried over  $\text{Na}_2\text{SO}_4$ , filtered over a sintered funnel, and evaporated to dryness. The oily residue was then directly flashed using a gradient of 100% Hexanes to 30% EtOAc in hexanes over a 40 g Grace Reveleris column using 45 mL/min flow, and injecting the crude on a silica gel precolumn pad. The column was pre-equilibrated with 100% Hexanes. The fractions containing pure product were combined and concentrated. The product (**6d**) was recuperated as a translucent oil (163.0 mg, 52% Yield). **R<sub>f</sub>**: 0.75 (20% EtOAc in Hexanes); **[a]<sub>D</sub><sup>25</sup>**:  $-437.2$  ( $c = 1.18$ ,  $\text{CHCl}_3$ ); **<sup>1</sup>H NMR** ( $\text{CDCl}_3$ , 400 MHz):  $\delta$  7.43-7.37 (m, 3H), 7.34-7.25 (br m, 2H), 5.92 (dt,  $J = 5.5, 11.5$  Hz, 1H), 5.46 (dd,  $J = 6.0, 12.0$  Hz, 1H), 5.17-5.08 (m, 1H), 4.93 (dd,  $J = 4.0, 5.5$  Hz, 1H), 3.60 (dd,  $J = 5.0, 9.5$  Hz, 1H), 3.51 (dd,  $J = 7.5, 9.5$  Hz, 1H), 3.40 (s, 3H), 3.24 (dt,  $J = 5.0, 7.5$  Hz, 1H), 1.72-1.64 (m, 1H), 1.19 (d,  $J = 6.5$  Hz, 3H), 0.80 (d,  $J = 7.0$  Hz, 3H), 0.64 (d,  $J = 7.0$  Hz, 3H); **<sup>13</sup>C NMR** ( $\text{CDCl}_3$ , 100 MHz):  $\delta$  155.8 (d,  $J = 2.5$  Hz,  $J_{\text{C-F}}$ ), 151.2 (d,  $J = 267.0$  Hz,  $J_{\text{C-F}}$ ), 132.8 (d,  $J = 3.0$  Hz,  $J_{\text{C-F}}$ ), 128.5, 127.7, 126.9, 120.5 (d,  $J = 5.0$  Hz,  $J_{\text{C-F}}$ ), 120.2 (d,  $J = 4.0$  Hz,  $J_{\text{C-F}}$ ), 85.3 (d,  $J = 25.0$  Hz,  $J_{\text{C-F}}$ ), 75.6, 63.1, 58.9, 52.3 (d,  $J = 1.5$  Hz,  $J_{\text{C-F}}$ ), 30.9, 19.6, 17.6, 17.2; **<sup>19</sup>F NMR** ( $\text{CDCl}_3$ , 376 MHz):  $\delta$   $-89.5$  **FTIR** ( $\text{cm}^{-1}$ ) (neat): 2961, 2929, 2874, 1677, 1630, 1386, 1259, 1198, 1113; **HRMS** (ESI, Pos): calcd for  $\text{C}_{19}\text{H}_{26}\text{N}_2\text{OF}$   $[\text{M}+\text{H}]^+$ : 317.2024  $m/z$ , found: 317.2021  $m/z$ . **Note:** The product is unstable on the bench and decomposes within a couple of hours in solution.



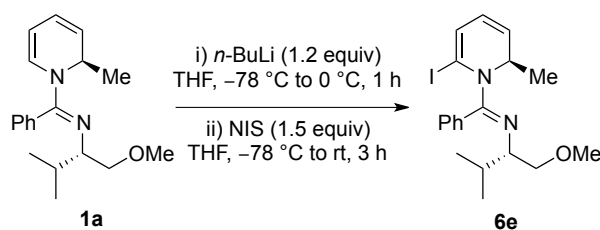

**(S,E)-N-(((R)-6-iodo-2-methylpyridin-1(2H)-yl)(phenyl)methylene)-1-methoxy-3-**

**methylbutan-2-amine (6e):** To a flame-dried 5 mL microwave glass reactor (Biotage® 2-5 mL vials) equipped with a magnetic stir bar was added (*E*)-*N*-[(2*S*)-1-methoxy-3-methylbutan-2-yl]-1-[(2*R*)-2-methylpyridin-1(2*H*)-yl]-1-phenylmethanimine<sup>2</sup> (**1a**) (298.2 mg, 1.0 mmol, 1.0 equiv) and the vial was capped with a 14 mm rubber septum. Then, the vial was purged with argon (10 min) and the dihydropyridine was diluted with anhydrous THF (4.0 mL, 0.25 M). The reaction flask was then cooled to  $-78\text{ }^\circ\text{C}$  using an acetone/dry ice cooling bath and a solution of *n*-BuLi in hexanes (1.2 mmol, 1.2 equiv) was added dropwise to the reaction. The reaction was stirred from  $-78\text{ }^\circ\text{C}$  to  $0\text{ }^\circ\text{C}$  over the course of 1 hour. The reaction turned gradually from a yellow solution to a red/brown solution over the course of the reaction. The reaction was then cooled again to  $-78\text{ }^\circ\text{C}$ . In a separate 10 mL flame-dried round bottom flask equipped with a magnetic stirbar was added NIS (338 mg, 1.5 mmol, 1.5 equiv). NIS was diluted with anhydrous THF (1.0 mL, 1.0 M) and the solution was transferred to the reaction dropwise at  $-78\text{ }^\circ\text{C}$ . The flask was rinsed with anhydrous THF (0.5 mL, 2.0 M) and the solvent was transferred to the reaction. The reaction was slowly heated to room temperature over the course of 3 hours. The reaction was then quenched by addition of a saturated solution of sodium bicarbonate ( $\text{NaHCO}_3$ ) (1.0 mL). The biphasic solution was transferred to a 30 mL extraction funnel and DCM was added (~15 mL). The layers were separated and the aqueous layer was extracted with DCM (3x). The organic layers were combined, dried over  $\text{Na}_2\text{SO}_4$ , filtered over a sintered funnel, and evaporated to dryness. The oily residue was then directly flashed using a gradient of 100% Hexanes to 70% EtOAc in hexanes over a 24 g Isco Gold column using 35 mL/min flow, and injecting the crude on a silica gel precolumn pad. The column was pre-equilibrated with 100% Hexanes. The fractions containing pure product were combined and concentrated. The product (**6e**) was recuperated as an orange oil (312 mg, 74% Yield).  $R_f$ : 0.70 (10% EtOAc in Hexanes);  $[\alpha]_D^{25}$ :  $-468.0$  ( $c = 0.48$ ,  $\text{CHCl}_3$ );  $^1\text{H NMR}$  ( $\text{CDCl}_3$ , 400 MHz):  $\delta$  7.43-7.30 (m, 5H), 6.28 (d,  $J = 3.0$  Hz, 1H), 5.79-5.67 (m, 1H), 4.46 (app br qn,  $J = 6.0$  Hz, 1H), 3.63 (dd,  $J = 4.5, 9.0$  Hz, 1H), 3.52 (app t,  $J = 8.0$  Hz, 1H), 3.39 (s, 3H), 3.35-3.27 (m, 1H), 1.80-1.68 (m, 1H), 1.11 (d,  $J = 6.5$  Hz, 3H), 0.89 (d,  $J = 7.0$  Hz, 3H), 0.74 (d,  $J = 7.0$  Hz, 3H);  $^{13}\text{C NMR}$  ( $\text{CDCl}_3$ , 75 MHz):  $\delta$  158.3, 133.0, 129.4, 128.7, 127.7, 125.8, 125.4, 122.4, 90.3, 75.4, 64.7, 58.9, 51.4, 31.2, 19.3, 17.6, 15.8; **FTIR** ( $\text{cm}^{-1}$ ) (neat): 2964, 2872, 1638, 1591, 1531, 1448, 1367, 1268, 695; **HRMS** (ESI, Pos): calcd for  $\text{C}_{19}\text{H}_{26}\text{N}_2\text{OI}$   $[\text{M}+\text{H}]^+$ : 425.1090  $m/z$ , found: 425.1091  $m/z$ . **Note:** The product is unstable on the bench and decomposes within a couple of hours in solution.

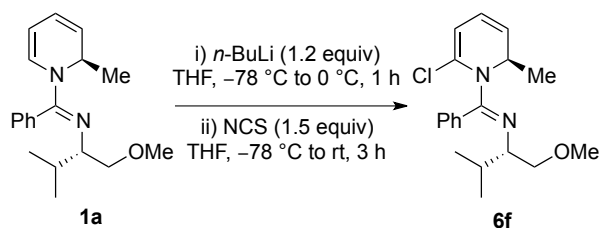

**(S,E)-N-(((R)-6-chloro-2-methylpyridin-1(2H)-yl)(phenyl)methylene)-1-methoxy-3-methylbutan-2-amine (6f):** To a flame-dried 5 mL microwave glass reactor (Biotage® 2-5 mL vials) equipped with a magnetic stir bar was added (*E*)-*N*-[(2*S*)-1-methoxy-3-methylbutan-2-yl]-1-[(2*R*)-2-methylpyridin-1(2*H*)-yl]-1-phenylmethanimine<sup>2</sup> (**1a**) (298.2 mg, 1.0 mmol, 1.0 equiv) and the vial was capped with a 14 mm rubber septum. Then, the vial was purged with argon (10 min) and the dihydropyridine was diluted with anhydrous THF (4.0 mL, 0.25 M). The reaction flask was then cooled to  $-78\text{ }^{\circ}\text{C}$  using an acetone/dry ice cooling bath and a solution of *n*-BuLi in hexanes (1.2 mmol, 1.2 equiv) was added dropwise to the reaction. The reaction was stirred from  $-78\text{ }^{\circ}\text{C}$  to  $0\text{ }^{\circ}\text{C}$  over the course of 1 hour. The reaction turned gradually from a yellow solution to a red/brown solution over the course of the reaction. The reaction was then cooled again to  $-78\text{ }^{\circ}\text{C}$ . In a separate 10 mL flame-dried round bottom flask equipped with a magnetic stirbar was added NCS (200.0 mg, 1.5 mmol, 1.5 equiv). NCS was diluted with anhydrous THF (1.0 mL, 1.0 M) and the solution was transferred to the reaction dropwise at  $-78\text{ }^{\circ}\text{C}$ . The flask was rinsed with anhydrous THF (0.5 mL, 2.0 M) and the solvent was transferred to the reaction. The reaction was slowly heated to room temperature over the course of 3 hours. The reaction was then quenched by addition of a saturated solution of sodium bicarbonate ( $\text{NaHCO}_3$ ) (1.0 mL). The biphasic solution was transferred to a 30 mL extraction funnel and DCM was added ( $\sim 15\text{ mL}$ ). The layers were separated and the aqueous layer was extracted with DCM (3x). The organic layers were combined, dried over  $\text{Na}_2\text{SO}_4$ , filtered over a sintered funnel, and evaporated to dryness. The oily residue was then directly flashed using a gradient of 100% Hexanes to 70% EtOAc in hexanes over a 24 g Isco Gold column using 35 mL/min flow, and injecting the crude on a silica gel precolumn pad. The column was pre-equilibrated with 100% Hexanes. The fractions containing pure product were combined and concentrated. The product (**6f**) was recuperated as a yellow oil (210 mg, 64% Yield).  $R_f$ : 0.70 (10% EtOAc in Hexanes);  $[\alpha]_D^{25}$ :  $-456.2$  ( $c = 0.72$ ,  $\text{CHCl}_3$ );  $^1\text{H NMR}$  ( $\text{CDCl}_3$ , 400 MHz):  $\delta$  7.43-7.30 (m, 5H), 5.93 (dd,  $J = 5.0, 9.0\text{ Hz}$ , 1H), 5.70 (d,  $J = 5.0\text{ Hz}$ , 1H), 5.63 (dd,  $J = 5.5, 9.0\text{ Hz}$ , 1H), 4.75 (app qn,  $J = 7.0\text{ Hz}$ , 1H), 3.63 (dd,  $J = 5.0, 9.5\text{ Hz}$ , 1H), 3.54 (dd,  $J = 7.5, 9.5\text{ Hz}$ , 1H), 3.40 (s, 3H), 3.33-3.29 (m, 1H), 1.76-1.64 (m, 1H), 1.13 (d,  $J = 7.0\text{ Hz}$ , 3H), 0.84 (d,  $J = 7.0\text{ Hz}$ , 3H), 0.66 (d,  $J = 7.0\text{ Hz}$ , 3H);  $^{13}\text{C NMR}$  ( $\text{CDCl}_3$ , 75 MHz):  $\delta$  158.0, 133.2, 129.7, 129.4, 128.9, 128.1, 124.3, 121.8, 111.2, 76.0, 64.3, 59.2, 52.5, 31.6, 19.9, 17.5, 17.4; **FTIR** ( $\text{cm}^{-1}$ ) (neat): 2959, 2890, 1625, 1600, 1554, 1491, 1446, 1380; **HRMS** (ESI, Pos): calcd for  $\text{C}_{19}\text{H}_{26}\text{N}_2\text{OCl}$   $[\text{M}+\text{H}]^+$ : 333.1734  $m/z$ , found: 333.1734  $m/z$ . **Note:** The product is unstable on the bench and decomposes within a couple of hours in solution.

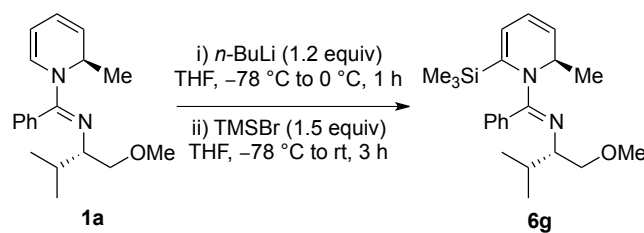

**(S,E)-1-Methoxy-3-methyl-N-((R)-2-methyl-6(trimethylsilyl)pyridin-1(2H)-yl)(phenyl)methylene)butan-2-amine (6g):** To a flame-dried 5 mL microwave glass reactor (Biotage® 2-5 mL vials) equipped with a magnetic stir bar was added (*E*)-*N*-[(2*S*)-1-methoxy-3-methylbutan-2-yl]-1-[(2*R*)-2-methylpyridin-1(2*H*)-yl]-1-phenylmethanimine<sup>2</sup> (**1a**) (298.2 mg, 1.0 mmol, 1.0 equiv) and the vial was capped with a 14 mm rubber septum. Then, the vial was purged with argon (10 min) and the dihydropyridine was diluted with anhydrous THF (4.0 mL, 0.25 M). The reaction flask was then cooled to  $-78\text{ }^{\circ}\text{C}$  using an acetone/dry ice cooling bath and a solution of *n*-BuLi in hexanes (1.2 mmol, 1.2 equiv) was added dropwise to the reaction. The reaction was stirred from  $-78\text{ }^{\circ}\text{C}$  to  $0\text{ }^{\circ}\text{C}$  over the course of 1 hour. The reaction turned gradually from a yellow solution to a red/brown solution over the course of the reaction. The reaction was then cooled again to  $-78\text{ }^{\circ}\text{C}$ . In a separate 10 mL flame-dried round bottom flask equipped with a magnetic stirbar was added TMSBr (229.6 mg, 200  $\mu\text{L}$ , 1.5 mmol, 1.5 equiv). TMSBr was diluted with anhydrous THF (1.0 mL, 1.0 M) and the solution was transferred to the reaction dropwise at  $-78\text{ }^{\circ}\text{C}$ . The flask was rinsed with anhydrous THF (0.5 mL, 2.0 M) and the solvent was transferred to the reaction. The reaction was slowly heated to room temperature over the course of 3 hours. The reaction was then quenched by addition of a saturated solution of sodium bicarbonate ( $\text{NaHCO}_3$ ) (1.0 mL). The biphasic solution was transferred to a 30 mL extraction funnel and DCM was added ( $\sim 15\text{ mL}$ ). The layers were separated and the aqueous layer was extracted with DCM (3x). The organic layers were combined, dried over  $\text{Na}_2\text{SO}_4$ , filtered over a sintered funnel, and evaporated to dryness. The oily residue was then directly flashed using a gradient of 100% Hexanes to 70% EtOAc in hexanes over a 24 g Isco Gold column using 35 mL/min flow, and injecting the crude on a silica gel precolumn pad. The column was pre-equilibrated with 100% Hexanes. The fractions containing pure product were combined and concentrated. The product (**6g**) was recuperated as a yellow oil (260.9 mg, 71% Yield).  $R_f$ : 0.60 (30% EtOAc in Hexanes);  $[\alpha]_D^{25}$ :  $-940.7$  ( $c = 0.533$ ,  $\text{CHCl}_3$ );  $^1\text{H NMR}$  ( $\text{CDCl}_3$ , 300 MHz):  $\delta$  7.43-7.26 (m, 5H), 5.97 (dd,  $J = 4.0, 7.0\text{ Hz}$ , 1H), 5.85 (dd,  $J = 0.5, 3.5\text{ Hz}$ , 1H), 5.69 (dd,  $J = 4.0, 6.5\text{ Hz}$ , 1H), 4.84-4.74 (br m, 1H), 3.65 (dd,  $J = 4.0, 7.5\text{ Hz}$ , 1H), 3.45 (dd,  $J = 5.5, 7.5\text{ Hz}$ , 1H), 3.37 (s, 3H), 3.20-3.16 (m, 1H), 1.68-1.60 (m, 1H), 1.01 (d,  $J = 5.5\text{ Hz}$ , 3H), 0.75 (d,  $J = 5.5\text{ Hz}$ , 3H), 0.64 (d,  $J = 5.5\text{ Hz}$ , 3H),  $-0.10$  (s, 9H);  $^{13}\text{C NMR}$  ( $\text{CDCl}_3$ , 75 MHz):  $\delta$  160.2, 144.0, 133.6, 130.8, 129.1, 128.3, 126.2, 121.4, 121.3, 76.5, 64.6, 59.5, 49.9, 31.9, 19.7, 19.0, 16.6, 0.0; FTIR ( $\text{cm}^{-1}$ ) (neat): 2957, 2921, 2892, 1611, 1596, 1523, 1491, 1467, 1382; HRMS (ESI, Pos): calcd for  $\text{C}_{22}\text{H}_{35}\text{N}_2\text{OSi}$   $[\text{M}+\text{H}]^+$ : 371.2513  $m/z$ , found: 371.2519  $m/z$ .

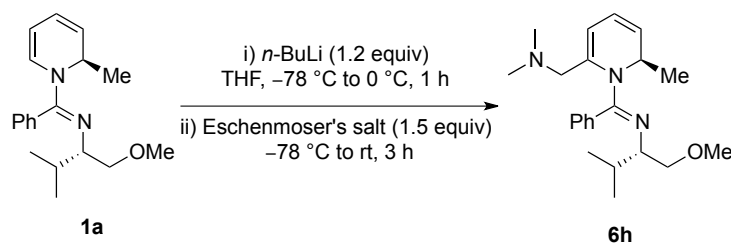

**(S,E)-N-(((R)-6-((dimethylamino)methyl)-2-methylpyridin-1(2H)-yl)(phenyl)methylene)-1-methoxy-3-methylbutan-2-amine (6h):** To a flame-dried 5 mL microwave glass reactor (Biotage® 2-5 mL vials) equipped with a magnetic stir bar was added (*E*)-*N*-[(2*S*)-1-methoxy-3-methylbutan-2-yl]-1-[(2*R*)-2-methylpyridin-1(2*H*)-yl]-1-phenylmethanimine<sup>2</sup> (**1a**) (298.2 mg, 1.0 mmol, 1.0 equiv) and the vial was capped with a 14 mm rubber septum. Then, the vial was purged with argon (10 min) and the dihydropyridine was diluted with anhydrous THF (4.0 mL, 0.25 M). The reaction flask was then cooled to  $-78\text{ }^{\circ}\text{C}$  using an acetone/dry ice cooling bath and a solution of *n*-BuLi in hexanes (1.2 mmol, 1.2 equiv) was added dropwise to the reaction. The reaction was stirred from  $-78\text{ }^{\circ}\text{C}$  to  $0\text{ }^{\circ}\text{C}$  over the course of 1 hour. The reaction turned gradually from a yellow solution to a red/brown solution over the course of the reaction. Then, solid dimethylmethyleneammonium iodide (Eschenmoser's salt) (277.5 mg, 1.5 mmol, 1.5 equiv) was transferred directly to the reaction at  $-78\text{ }^{\circ}\text{C}$ . The reaction was slowly heated to room temperature over the course of 3 hours. The reaction was then quenched by addition of a saturated solution of sodium carbonate ( $\text{Na}_2\text{CO}_3$ ) (1.0 mL). The biphasic solution was transferred to a 30 mL extraction funnel and DCM was added ( $\sim 15$  mL). The layers were separated and the aqueous layer was extracted with DCM (3x). The organic layers were combined, dried over  $\text{Na}_2\text{SO}_4$ , filtered over a sintered funnel, and evaporated to dryness. The oily residue was then directly flashed using a gradient of 30% Hexanes to 100% EtOAc in hexanes over a 30 g **Isco Amino Gold column** using 45 mL/min flow, and injecting the crude on a celite precolumn pad. The column was pre-equilibrated with 30% EtOAc in hexanes. The fractions containing pure product were combined and concentrated. The product (**6h**) was recuperated as a translucent oil (283.6 mg, 80% Yield).  $R_f$ : 0.20 (10% MeOH in EtOAc, silica gel);  $[\alpha]_D^{25}$ :  $-473.5$  ( $c = 0.958$ ,  $\text{CHCl}_3$ );  $^1\text{H NMR}$  ( $\text{CDCl}_3$ , 400 MHz):  $\delta$  7.45-7.22 (m, 5H), 5.95 (br dd,  $J = 5.5, 9.0$  Hz, 1H), 5.62-5.55 (br m, 1H), 5.51-5.45 (br m, 1H), 4.87-4.78 (br m, 1H), 3.70-3.63 (br m, 1H), 3.48 (dd,  $J = 7.0, 10$  Hz, 1H), 3.42 (s, 3H), 3.31-3.24 (br m, 1H), 2.60-2.40 (m, 2H), 2.07 (s, 6H), 1.72-1.60 (br m, 1H), 1.10 (d,  $J = 7.0$  Hz, 3H), 0.80 (d,  $J = 7.0$  Hz, 3H), 0.63 (d,  $J = 7.0$  Hz, 3H);  $^{13}\text{C NMR}$  ( $\text{CDCl}_3$ , 100 MHz):  $\delta$  159.3, 138.1, 134.2, 129.6, 128.5, 127.9, 123.2, 121.5, 108.9, 76.1, 63.9, 62.9, 59.3, 51.5, 44.9, 31.4, 19.9, 18.4, 17.5; **FTIR** ( $\text{cm}^{-1}$ ) (neat): 2959, 2872, 2913, 2767, 1618, 1567, 1490, 1446, ; **HRMS** (ESI, Pos): calcd for  $\text{C}_{22}\text{H}_{34}\text{N}_3\text{O}$   $[\text{M}+\text{H}]^+$ : 356.2702  $m/z$ , found: 356.2705  $m/z$ .

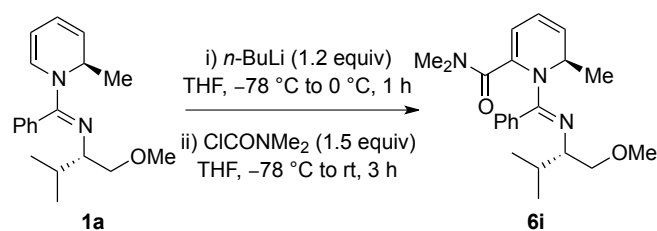

**(R)-1-((E)-1-(((S)-1-Methoxy-3-methylbutan-2-yl)imino)(phenyl)methyl)-N,N-6-**

**trimethyl-1,6-dihydropyridine-2-carboxamide (6i):** To a flame-dried 5 mL microwave glass reactor (Biotage® 2-5 mL vials) equipped with a magnetic stir bar was added (*E*)-*N*-[(2*S*)-1-methoxy-3-methylbutan-2-yl]-1-[(2*R*)-2-methylpyridin-1(2*H*)-yl]-1-phenylmethanimine<sup>2</sup> (**1a**) (298.2 mg, 1.0 mmol, 1.0 equiv) and the vial was capped with a 14 mm rubber septum. Then, the vial was purged with argon (10 min) and the dihydropyridine was diluted with anhydrous THF (4.0 mL, 0.25 M). The reaction flask was then cooled to  $-78\text{ }^{\circ}\text{C}$  using an acetone/dry ice cooling bath and a solution of *n*-BuLi in hexanes (1.2 mmol, 1.2 equiv) was added dropwise to the reaction. The reaction was stirred from  $-78\text{ }^{\circ}\text{C}$  to  $0\text{ }^{\circ}\text{C}$  over the course of 1 hour. The reaction turned gradually from a yellow solution to a red/brown solution over the course of the reaction. The reaction was then cooled again to  $-78\text{ }^{\circ}\text{C}$ . In a separate 10 mL flame-dried round bottom flask equipped with a magnetic stirbar was added distilled *N,N*-dimethylcarbamoyl chloride (161.3 mg, 140  $\mu\text{L}$ , 1.5 mmol, 1.5 equiv). The chloride was diluted with anhydrous THF (1.0 mL, 1.0 M) and the solution was transferred to the reaction dropwise at  $-78\text{ }^{\circ}\text{C}$ . The flask was rinsed with anhydrous THF (0.5 mL, 2.0 M) and the solvent was transferred to the reaction. The reaction was slowly heated to room temperature over the course of 3 hours. The reaction was then quenched by addition of a saturated solution of sodium bicarbonate ( $\text{NaHCO}_3$ ) (1.0 mL). The biphasic solution was transferred to a 30 mL extraction funnel and DCM was added ( $\sim 15\text{ mL}$ ). The layers were separated and the aqueous layer was extracted with DCM (3x). The organic layers were combined, dried over  $\text{Na}_2\text{SO}_4$ , filtered over a sintered funnel, and evaporated to dryness. The oily residue was then directly flashed using a gradient of 100% Hexanes to 70% EtOAc in hexanes over a 24 g Isco Gold column using 35 mL/min flow, and injecting the crude on a silica gel precolumn pad. The column was pre-equilibrated with 100% Hexanes. The fractions containing pure product were combined and concentrated. The product (**6i**) was recuperated as a yellow oil (297 mg, 81% Yield). **R<sub>f</sub>**: 0.10 (30% EtOAc in Hexanes); **[ $\alpha$ ]<sub>D</sub><sup>25</sup>**:  $-685.1$  ( $c = 0.458$ ,  $\text{CHCl}_3$ ); **<sup>1</sup>H NMR** ( $\text{CDCl}_3$ , 400 MHz):  $\delta$  7.46-7.23 (m, 5H), 5.98 (dd,  $J = 5.0, 9.0\text{ Hz}$ , 1H), 5.70-5.58 (m, 1H), 5.56 (d,  $J = 5.0\text{ Hz}$ , 1H), 5.20-3.73 (very br m, 1H), 3.58-3.45 (m, 1H), 3.39-3.32 (m, 1H), 3.33 (s, 3H), 3.11-2.88 (m, 4H), 2.87-2.53 (br s, 3H), 1.62-1.48 (m, 1H), 1.07 (br d,  $J = 4.5\text{ Hz}$ , 3H), 0.73 (d,  $J = 6.5\text{ Hz}$ , 3H), 0.65 (d,  $J = 6.5\text{ Hz}$ , 3H); **<sup>13</sup>C NMR** ( $\text{CDCl}_3$ , 100 MHz):  $\delta$  167.7, 157.9, 133.0, 132.7, 128.9 (br), 128.3, 127.6 (br), 125.8, 120.5, 110.6, 75.8, 63.9, 58.7, 49.1 and 39.0 (rotamers), 34.8, 30.8, 19.4, 17.4, 17.3; **FTIR** ( $\text{cm}^{-1}$ ) (neat): 2955, 2922, 2872, 2824, 1641, 1623, 1560, 1491, 1445, 1387; **HRMS** (ESI, Pos): calcd for  $\text{C}_{22}\text{H}_{32}\text{N}_3\text{O}_2$  [ $\text{M}+\text{H}$ ]<sup>+</sup>: 370.2495  $m/z$ , found: 370.2497  $m/z$ .

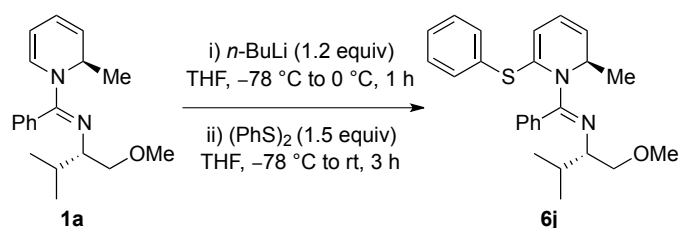

**(S,E)-1-Methoxy-3-methyl-N-((R)-2-methyl-6-(phenylthio)pyridin-1(2H)-yl)(phenyl)methylene)butan-2-amine (6j):** To a flame-dried 5 mL microwave glass reactor (Biotage® 2-5 mL vials) equipped with a magnetic stir bar was added (*E*)-*N*-[(2*S*)-1-methoxy-3-methylbutan-2-yl]-1-[(2*R*)-2-methylpyridin-1(2*H*)-yl]-1-phenylmethanimine<sup>2</sup> (**1a**) (298.2 mg, 1.0 mmol, 1.0 equiv) and the vial was capped with a 14 mm rubber septum. Then, the vial was purged with argon (10 min) and the dihydropyridine was diluted with anhydrous THF (4.0 mL, 0.25 M). The reaction flask was then cooled to  $-78\text{ }^{\circ}\text{C}$  using an acetone/dry ice cooling bath and a solution of *n*-BuLi in hexanes (1.2 mmol, 1.2 equiv) was added dropwise to the reaction. The reaction was stirred from  $-78\text{ }^{\circ}\text{C}$  to  $0\text{ }^{\circ}\text{C}$  over the course of 1 hour. The reaction turned gradually from a yellow solution to a red/brown solution over the course of the reaction. In a separate 10 mL flame-dried round bottom flask equipped with a magnetic stirbar was added diphenyl disulfide (327.5 mg, 1.5 mmol, 1.5 equiv). The disulfide was diluted with anhydrous THF (1.0 mL, 1.0 M) and the solution was transferred to the reaction dropwise at  $-78\text{ }^{\circ}\text{C}$ . The flask was rinsed with anhydrous THF (0.5 mL, 2.0 M) and the solvent was transferred to the reaction. The reaction was slowly heated to room temperature over the course of 3 hours. The reaction was then quenched by addition of a saturated solution of sodium bicarbonate ( $\text{NaHCO}_3$ ) (1.0 mL). The biphasic solution was transferred to a 30 mL extraction funnel and DCM was added ( $\sim 15\text{ mL}$ ). The layers were separated and the aqueous layer was extracted with DCM (3x). The organic layers were combined, dried over  $\text{Na}_2\text{SO}_4$ , filtered over a sintered funnel, and evaporated to dryness. The oily residue was then directly flashed using a gradient of 100% Hexanes to 80% EtOAc in hexanes over a 40 g Isco Gold column using 45 mL/min flow, and injecting the crude on a silica gel precolumn pad. The column was pre-equilibrated with 100% Hexanes. The fractions containing pure product were combined and concentrated. The product (**6j**) was recuperated as a red oil (347 mg, 86% Yield).  $R_f$ : 0.75 (20% EtOAc in Hexanes);  $[\alpha]_D^{25}$ :  $-353.0$  ( $c = 0.475$ ,  $\text{CHCl}_3$ );  $^1\text{H NMR}$  ( $\text{CDCl}_3$ , 400 MHz):  $\delta$  7.43-7.21 (m, 10H), 5.97 (dd,  $J = 5.0, 9.0\text{ Hz}$ , 1H), 5.81 (d,  $J = 5.0\text{ Hz}$ , 1H), 5.62 (dd,  $J = 6.5, 9.0\text{ Hz}$ , 1H), 4.69 (app qn,  $J = 8.5\text{ Hz}$ , 1H), 3.59 (dd,  $J = 5.0, 9.5\text{ Hz}$ , 1H), 3.41 (dd,  $J = 7.0, 9.5\text{ Hz}$ , 1H), 3.33 (s, 3H), 3.28 (dt,  $J = 5.0, 7.0\text{ Hz}$ , 1H), 1.73-1.64 (m, 1H), 1.82-1.74 (m, 1H), 0.97 (d,  $J = 6.5\text{ Hz}$ , 3H), 0.83 (d,  $J = 7.0\text{ Hz}$ , 3H), 0.67 (d,  $J = 7.0\text{ Hz}$ , 3H);  $^{13}\text{C NMR}$  ( $\text{CDCl}_3$ , 75 MHz):  $\delta$  159.2, 135.2, 133.8, 132.0, 131.5, 129.4, 128.7, 128.6, 127.9, 127.2, 124.3, 122.1, 116.5, 76.0, 64.3, 59.2, 52.0, 31.5, 19.9, 18.1, 17.8; **FTIR** ( $\text{cm}^{-1}$ ) (neat): 3059, 2959, 2923, 2890, 1624, 1533, 1475, 1445; **HRMS** (ESI, Pos): calcd for  $\text{C}_{25}\text{H}_{31}\text{N}_2\text{S}$   $[\text{M}+\text{H}]^+$ : 407.2152  $m/z$ , found: 407.2162  $m/z$ .

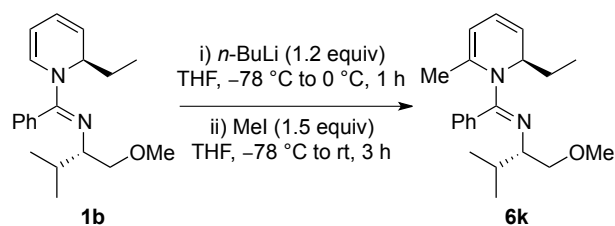

**(*S,E*)-*N*-(((*R*)-2-ethyl-6-methylpyridin-1(*2H*)-yl)(phenyl)methylene)-1-methoxy-3-**

**methylbutan-2-amine (6k):** To a flame-dried 5 mL microwave glass reactor (Biotage® 2-5 mL vials) equipped with a magnetic stir bar was added (*E*)-*N*-[(*2S*)-1-methoxy-3-methylbutan-2-yl]-1-[(*2R*)-2-ethylpyridin-1(*2H*)-yl]-1-phenylmethanimine<sup>2</sup> (**1b**) (312.2 mg, 1.0 mmol, 1.0 equiv) and the vial was capped with a 14 mm rubber septum. Then, the vial was purged with argon (10 min) and the dihydropyridine was diluted with anhydrous THF (4.0 mL, 0.25 M). The reaction flask was then cooled to  $-78\text{ }^{\circ}\text{C}$  using an acetone/dry ice cooling bath and a solution of *n*-BuLi in hexanes (1.2 mmol, 1.2 equiv) was added dropwise to the reaction. The reaction was stirred from  $-78\text{ }^{\circ}\text{C}$  to  $0\text{ }^{\circ}\text{C}$  over the course of 1 hour. The reaction turned gradually from a yellow solution to a red/brown solution over the course of the reaction. The reaction was then cooled again to  $-78\text{ }^{\circ}\text{C}$ . In a separate 10 mL flame-dried round bottom flask equipped with a magnetic stirbar was added iodomethane (212.9 mg, 94  $\mu\text{L}$ , 1.5 mmol, 1.5 equiv). The iodide was diluted with anhydrous THF (1.0 mL, 1.0 M) and the solution was transferred to the reaction dropwise at  $-78\text{ }^{\circ}\text{C}$ . The flask was rinsed with anhydrous THF (0.5 mL, 2.0 M) and the solvent was transferred to the reaction. The reaction was slowly heated to room temperature over the course of 3 hours. The reaction was then quenched by addition of a saturated solution of sodium bicarbonate ( $\text{NaHCO}_3$ ) (1.0 mL). The biphasic solution was transferred to a 30 mL extraction funnel and DCM was added ( $\sim 15\text{ mL}$ ). The layers were separated and the aqueous layer was extracted with DCM (3x). The organic layers were combined, dried over  $\text{Na}_2\text{SO}_4$ , filtered over a sintered funnel, and evaporated to dryness. The oily residue was then directly flashed using a gradient of 100% Hexanes to 70% EtOAc in hexanes over a 24 g Isco Gold column using 35 mL/min flow, and injecting the crude on a silica gel precolumn pad. The column was pre-equilibrated with 100% Hexanes. The fractions containing pure product were combined and concentrated. The product (**6k**) was recuperated as a yellow oil (278.2 mg, 86% Yield).  $R_f$ : 0.60 (30% EtOAc in Hexanes);  $[\alpha]_D^{25}$ :  $-880$  ( $c = 0.55$ ,  $\text{CHCl}_3$ );  $^1\text{H NMR}$  ( $\text{CDCl}_3$ , 300 MHz):  $\delta$  7.40-7.34 (m, 3H), 7.31-7.24 (br m, 2H), 5.94 (dd,  $J = 4.0, 7.0\text{ Hz}$ , 1H), 5.60 (dd,  $J = 4.5, 7.0\text{ Hz}$ , 1H), 5.27 (d,  $J = 4.0\text{ Hz}$ , 1H), 4.73 (q,  $J = 5.5\text{ Hz}$ , 1H), 3.62 (dd,  $J = 4.0, 7.0\text{ Hz}$ , 1H), 3.48 (dd,  $J = 5.5, 7.0\text{ Hz}$ , 1H), 3.40 (s, 3H), 3.25 (dt,  $J = 4.0, 5.5\text{ Hz}$ , 1H), 1.71-1.62 (m, 1H), 1.58-1.47 (m, 2H), 1.49 (s, 3H), 0.87 (t,  $J = 5.5\text{ Hz}$ , 3H), 0.83 (d,  $J = 5.0\text{ Hz}$ , 3H), 0.62 (d,  $J = 5.0\text{ Hz}$ , 3H);  $^{13}\text{C NMR}$  ( $\text{CDCl}_3$ , 75 MHz):  $\delta$  159.2, 137.1, 134.5, 129.4, 128.5, 128.1, 122.3, 121.1, 109.1, 76.2, 63.5, 59.2, 55.9, 31.4, 25.2, 22.5, 20.0, 17.2, 9.7; FTIR ( $\text{cm}^{-1}$ ) (neat): 2959, 2926, 2889, 2872, 2822, 2808, 1617, 1568, 1458, 1446, 1383; HRMS (ESI, Pos): calcd for  $\text{C}_{21}\text{H}_{31}\text{N}_2\text{O}$   $[\text{M}+\text{H}]^+$ : 327.2430  $m/z$ , found: 327.2436  $m/z$ .

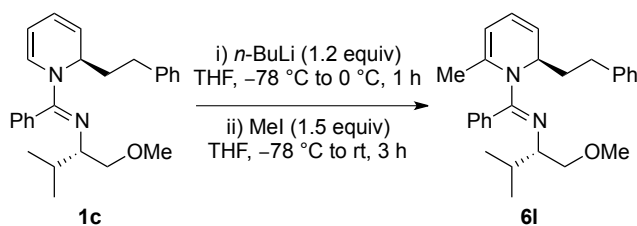

**(*S,E*)-1-Methoxy-3-methyl-*N*-(((*R*)-6-methyl-2-phenethylpyridin-1(2*H*)-yl)(phenyl)methylene)butan-2-amine (**6I**):**

To a flame-dried 5 mL microwave glass reactor (Biotage® 2-5 mL vials) equipped with a magnetic stir bar was added *N*-[*(R)*-2-phenethyl-2*H*-pyridin-1-yl]-*N*-[*(S)*-2-(1-methoxy-3-methylbutyl)]-benzamidine (**1c**) (388.3 mg, 1.0 mmol, 1.0 equiv) and the vial was capped with a 14 mm rubber septum. Then, the vial was purged with argon (10 min) and the dihydropyridine was diluted with anhydrous THF (4.0 mL, 0.25 M). The reaction flask was then cooled to  $-78\text{ }^{\circ}\text{C}$  using an acetone/dry ice cooling bath and a solution of *n*-BuLi in hexanes (1.2 mmol, 1.2 equiv) was added dropwise to the reaction. The reaction was stirred from  $-78\text{ }^{\circ}\text{C}$  to  $0\text{ }^{\circ}\text{C}$  over the course of 1 hour. The reaction turned gradually from a yellow solution to a red/brown solution over the course of the reaction. The reaction was then cooled again to  $-78\text{ }^{\circ}\text{C}$ . In a separate 10 mL flame-dried round bottom flask equipped with a magnetic stirbar was added iodomethane (212.9 mg, 94  $\mu\text{L}$ , 1.5 mmol, 1.5 equiv). The iodide was diluted with anhydrous THF (1.0 mL, 1.0 M) and the solution was transferred to the reaction dropwise at  $-78\text{ }^{\circ}\text{C}$ . The flask was rinsed with anhydrous THF (0.5 mL, 2.0 M) and the solvent was transferred to the reaction. The reaction was slowly heated to room temperature over the course of 3 hours. The reaction was then quenched by addition of a saturated solution of sodium bicarbonate ( $\text{NaHCO}_3$ ) (1.0 mL). The biphasic solution was transferred to a 30 mL extraction funnel and DCM was added ( $\sim 15\text{ mL}$ ). The layers were separated and the aqueous layer was extracted with DCM (3x). The organic layers were combined, dried over  $\text{Na}_2\text{SO}_4$ , filtered over a sintered funnel, and evaporated to dryness. The oily residue was then directly flashed using a gradient of 100% Hexanes to 70% EtOAc in hexanes over a 24 g Isco Gold column using 35 mL/min flow, and injecting the crude on a silica gel precolumn pad. The column was pre-equilibrated with 100% Hexanes. The fractions containing pure product were combined and concentrated. The product (**6I**) was recuperated as a yellow oil (324 mg, 81% Yield).

**R<sub>f</sub>**: 0.80 (30% EtOAc in Hexanes); [ $\alpha$ ]<sub>D</sub><sup>25</sup>:  $-567$  ( $c = 0.667$ ,  $\text{CHCl}_3$ ); **<sup>1</sup>H NMR** ( $\text{CDCl}_3$ , 300 MHz):  $\delta$  7.37-7.35 (m, 3H), 7.28-7.15 (m, 7H), 5.95 (dd,  $J = 5.0, 7.0\text{ Hz}$ , 1H), 5.65-5.58 (m, 1H), 5.27 (dt,  $J = 1.0, 5.0\text{ Hz}$ , 1H), 4.98 (app q,  $J = 6.5\text{ Hz}$ , 1H), 3.62 (dd,  $J = 4.0, 9.5\text{ Hz}$ , 1H), 3.49 (dd,  $J = 7.5, 9.5\text{ Hz}$ , 1H), 3.40 (s, 3H), 3.27-3.25 (m, 1H), 2.67 (dt,  $J = 6.5, 9.0\text{ Hz}$ , 2H), 1.84 (app q,  $J = 7.0\text{ Hz}$ , 2H), 1.71-1.59 (m, 1H), 1.40 (s, 3H), 0.79 (d,  $J = 7.0\text{ Hz}$ , 3H), 0.60 (d,  $J = 7.0\text{ Hz}$ , 3H); **<sup>13</sup>C NMR** ( $\text{CDCl}_3$ , 75 MHz):  $\delta$  159.0, 143.1, 137.0, 134.4, 129.4, 128.6, 128.4, 128.2, 128.1, 125.4, 122.5, 120.9, 109.1, 76.4, 63.5, 59.2, 54.3, 33.6, 31.6, 31.5, 22.5, 20.0, 17.4; **FTIR** ( $\text{cm}^{-1}$ ) (neat): 2955, 2923, 2889, 1617, 1598, 1568, 1366; **HRMS** (ESI, Pos): calcd for  $\text{C}_{25}\text{H}_{35}\text{N}_2\text{O}$  [ $\text{M}+\text{H}$ ]<sup>+</sup>: 403.2744  $m/z$ , found: 403.2752  $m/z$ .



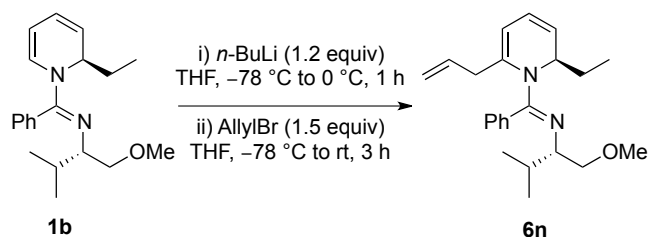

**(*S,E*)-*N*-(((*R*)-6-allyl-2-ethylpyridin-1(*2H*)-yl)(phenyl)methylene)-1-methoxy-3-**

**methylbutan-2-amine (6n):** To a flame-dried 5 mL microwave glass reactor (Biotage® 2-5 mL vials) equipped with a magnetic stir bar was added (*E*)-*N*-[(2*S*)-1-methoxy-3-methylbutan-2-yl]-1-[(2*R*)-2-ethylpyridin-1(*2H*)-yl]-1-phenylmethanimine<sup>2</sup> (**1b**) (312.2 mg, 1.0 mmol, 1.0 equiv) and the vial was capped with a 14 mm rubber septum. Then, the vial was purged with argon (10 min) and the dihydropyridine was diluted with anhydrous THF (4.0 mL, 0.25 M). The reaction flask was then cooled to  $-78\text{ }^{\circ}\text{C}$  using an acetone/dry ice cooling bath and a solution of *n*-BuLi in hexanes (1.2 mmol, 1.2 equiv) was added dropwise to the reaction. The reaction was stirred from  $-78\text{ }^{\circ}\text{C}$  to  $0\text{ }^{\circ}\text{C}$  over the course of 1 hour. The reaction turned gradually from a yellow solution to a red/brown solution over the course of the reaction. The reaction was then cooled again to  $-78\text{ }^{\circ}\text{C}$ . In a separate 10 mL flame-dried round bottom flask equipped with a magnetic stirbar was added distilled allylbromide (181.2 mg, 130  $\mu\text{L}$ , 1.5 mmol, 1.5 equiv). The bromide was diluted with anhydrous THF (1.0 mL, 1.0 M) and the solution was transferred to the reaction dropwise at  $-78\text{ }^{\circ}\text{C}$ . The flask was rinsed with anhydrous THF (0.5 mL, 2.0 M) and the solvent was transferred to the reaction. The reaction was slowly heated to room temperature over the course of 3 hours. The reaction was then quenched by addition of a saturated solution of sodium bicarbonate ( $\text{NaHCO}_3$ ) (1.0 mL). The biphasic solution was transferred to a 30 mL extraction funnel and DCM was added ( $\sim 15\text{ mL}$ ). The layers were separated and the aqueous layer was extracted with DCM (3x). The organic layers were combined, dried over  $\text{Na}_2\text{SO}_4$ , filtered over a sintered funnel, and evaporated to dryness. The oily residue was then directly flashed using a gradient of 100% Hexanes to 70% EtOAc in hexanes over a 24 g Isco Gold column using 35 mL/min flow, and injecting the crude on a silica gel precolumn pad. The column was pre-equilibrated with 100% Hexanes. The fractions containing pure product were combined and concentrated. The product (**6n**) was recuperated as a clear oil (301 mg, 85% Yield).  $R_f$ : 0.70 (30% EtOAc in Hexanes);  $[\alpha]_D^{25}$ :  $-712.1$  ( $c = 0.87$ ,  $\text{CHCl}_3$ );  $^1\text{H NMR}$  ( $\text{CDCl}_3$ , 300 MHz):  $\delta$  7.41-7.34 (m, 3H), 7.32-7.24 (br m, 2H), 5.97 (dd,  $J = 4.0, 7.0$  Hz, 1H), 5.67-5.57 (m, 2H), 5.39 (d,  $J = 4.0$  Hz, 1H), 4.98-4.88 (m, 2H), 4.60 (q,  $J = 5.0$  Hz, 1H), 3.63 (dd,  $J = 4.0, 7.0$  Hz, 1H), 3.45 (dd,  $J = 5.5, 7.0$  Hz, 1H), 3.39 (s, 3H), 3.27-3.22 (m, 1H), 2.69-2.52 (m, 2H), 1.70-1.62 (m, 1H), 1.47 (qn,  $J = 5.5$  Hz, 2H), 0.85 (t,  $J = 5.5$  Hz, 3H), 0.82 (d,  $J = 5.0$  Hz, 3H), 0.63 (d,  $J = 5.0$  Hz, 3H);  $^{13}\text{C NMR}$  ( $\text{CDCl}_3$ , 75 MHz):  $\delta$  159.4, 139.6, 135.8, 134.1, 129.3, 128.6, 128.1, 122.2, 122.1, 116.0, 110.1, 76.2, 63.7, 59.2, 56.0, 39.7, 31.4, 25.0, 20.0, 17.3, 9.8; **FTIR** ( $\text{cm}^{-1}$ ) (neat): 2967, 1613, 1598, 1549, 1452; **HRMS** (ESI, Pos): calcd for  $\text{C}_{23}\text{H}_{33}\text{N}_2\text{O}$   $[\text{M}+\text{H}]^+$ : 353.2593  $m/z$ , found: 353.2599  $m/z$ .

## Directed lithiation/Negishi cross-coupling (6o-6y)

### General procedure for the lithiation/Negishi sequence on dihydropyridine **1a**

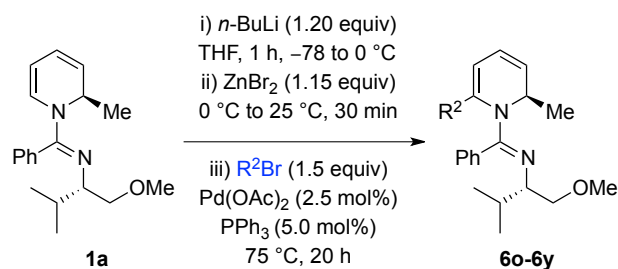

To a 2 mL oven-dried sealed tube (Biotage® 5 mL) equipped with a magnetic stirring bar, a rubber septum, and argon inlet was placed (2*S*)-1-methoxy-3-methyl-*N*-[(1*E*)-[(2*R*)-2-methylpyridin-1(2*H*)-yl](phenyl)methylene]butan-2-amine **1a** (298.4 mg, 1.0 mmol, 1.0 equiv). The dihydropyridine was dissolved in 4 mL of anhydrous THF and was stirred 10 minutes at  $-78\text{ }^{\circ}\text{C}$  in a dry ice and acetone bath. Then, a solution of *n*-BuLi in hexanes (1.2 mmol, 1.2 equiv) was added dropwise and was stirred 5 minutes at  $-78\text{ }^{\circ}\text{C}$ . The flask was then warmed at  $0\text{ }^{\circ}\text{C}$  over the course of 1 hour in an ice and water bath. The sealed tube was rapidly opened under a positive pressure of argon stream and anhydrous ZnBr<sub>2</sub> (255 mg, 1.15 mmol, 1.15 equiv) (weighted in a 2 mL scintillation vial, sealed with a plastic cap) was added quickly and tube was resealed. The tube was warmed to room temperature and stirred for 30 minutes. The sealed tube was opened again, and the aryl or vinyl bromide (1.5 mmol, 1.5 equiv), the Pd(OAc)<sub>2</sub> (5.6 mg, 0.025 mmol, 2.5 mol%) and the PPh<sub>3</sub> (13.1 mg, 0.05 mmol, 5.0 mol%) (weighted in a 2 mL scintillation vial, sealed with a plastic cap) were rapidly added under a positive pressure of argon stream and the tube was crimped with a Biotage microwave Teflon cap. The tube was heated at  $75\text{ }^{\circ}\text{C}$  with an oil bath and was stirred 20 hours at  $75\text{ }^{\circ}\text{C}$ . The reaction was cooled to room temperature, decapped and it was diluted with a solution of NaHCO<sub>3</sub> (sat.) and DCM. The biphasic mixture was transferred into a 60 mL separation funnel and the layers were separated. The water layer was extracted with dichloromethane (4 x 10 mL) and the organic layers were combined and dried over Na<sub>2</sub>SO<sub>4</sub>, filtered and concentrated.

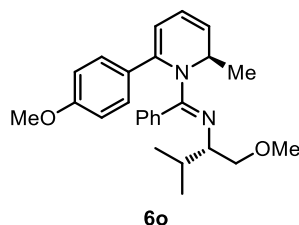

#### (2*S*)-1-methoxy-*N*-{[(2*R*)-6-(4-methoxyphenyl)-2-methylpyridin-1(2*H*)-yl](phenyl)methyl}-3-methylbutan-2-amine (**6o**):

Following the general Negishi procedure, the crude 2,6-disubstituted dihydropyridine **6o** was purified by chromatography on silica gel (100% Hexanes to 30% AcOEt/Hexanes) and the product (**6o**) was isolated as a yellow oil (275.0 mg, 68% Yield).  $R_f$ : 0.45 (30% EtOAc/Hexanes);  $[\alpha]_D^{25} = -531$  ( $c = 1.21$ , CHCl<sub>3</sub>);  $^1\text{H NMR}$  (CHCl<sub>3</sub>, 400 MHz):  $\delta$  7.09-6.90 (br m, 7H), 6.62 (d,  $J = 9.0$  Hz, 2H), 6.10 (dd,  $J = 6.0, 9.5$

Hz, 1H), 5.75 (dd,  $J = 6.0, 9.0$  Hz, 1H), 5.53 (d,  $J = 5.5$  Hz, 1H), 5.28-5.15 (m, 1H), 3.77 (s, 3H), 3.61 (dd,  $J = 4.0, 10.0$  Hz, 1H), 3.48-3.43 (m, 1H), 3.42 (s, 3H), 3.16-3.11 (m, 1H), 1.65-1.55 (m, 1H), 1.24 (d,  $J = 7.0$  Hz, 3H), 0.72 (d,  $J = 6.5$  Hz, 3H), 0.54 (d,  $J = 6.5$  Hz, 3H);  $^{13}\text{C}$  NMR ( $\text{CHCl}_3$ , 75 MHz):  $\delta$  160.2, 158.8, 139.5, 134.3, 133.6, 127.6, 127.4 (2), 127.0, 124.1, 122.2, 113.3, 108.3, 76.1, 63.7, 59.2, 55.3, 50.9, 31.2, 19.9, 17.6, 17.3; FTIR (neat) 2957, 1614, 1557, 1507, 1445, 1383, 1316, 1244  $\text{cm}^{-1}$ ; HRMS (ESI) Calcd for  $\text{C}_{26}\text{H}_{33}\text{N}_2\text{O}_2$   $[\text{M}+\text{H}]^+$ : 405.2542, Found: 405.2548.

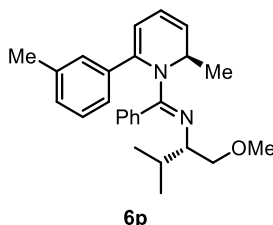

**(2S)-1-Methoxy-3-methyl-N-[(1E)-[(2R)-2-methyl-6-(3-methylphenyl)pyridine-1(2H)-yl](phenyl)methylene]butan-2-amine (6p)**: Following the general Negishi procedure, the crude 2,6-disubstituted dihydropyridine was purified by chromatography on silica gel (100% Hexanes to 30% AcOEt/Hexanes) and the product (**6p**) was isolated as a yellow oil (272.7 mg, 68% Yield).  $R_f$ : 0.70 (30% EtOAc/Hexanes);  $[\alpha]_D^{25}$ :  $-871$  ( $c = 0.96$ ,  $\text{CHCl}_3$ );  $^1\text{H}$  NMR ( $\text{CHCl}_3$ , 400 MHz):  $\delta$  7.37-6.59 (m, 9H), 6.11 (dd,  $J = 5.5, 9.5$  Hz, 1H), 5.76 (dd,  $J = 5.5, 9.0$  Hz, 1H), 5.58 (d,  $J = 5.0$  Hz, 1H), 5.26-5.16 (m, 1H), 3.60 (dd,  $J = 5.5, 10$  Hz, 1H), 3.45 (dd,  $J = 7.5, 9.5$  Hz, 1H), 3.42 (s, 3H), 3.16-3.12 (m, 1H), 2.20 (s, 3H), 1.62-1.54 (m, 1H), 1.25 (d,  $J = 6.5$  Hz, 3H), 0.69 (d,  $J = 7.0$  Hz, 3H), 0.52 (d,  $J = 7.0$  Hz, 3H);  $^{13}\text{C}$  NMR ( $\text{CHCl}_3$ , 100 MHz):  $\delta$  160.0, 140.6, 140.0, 137.2, 134.2, 130.3, 128.1, 127.6 (2), 127.4, 127.1, 124.5, 123.3, 122.1, 109.2, 76.2, 63.7, 59.3, 50.7, 31.2, 21.2, 19.8, 17.6, 17.3; FTIR ( $\text{cm}^{-1}$ ) (neat): 2957, 2922, 2871, 1613, 1597, 1445, 1383; HRMS (ESI, Pos): calcd for  $\text{C}_{26}\text{H}_{33}\text{N}_2\text{O}$   $[\text{M}+\text{H}]^+$ : 389.2593  $m/z$ , found: 389.2600  $m/z$ .

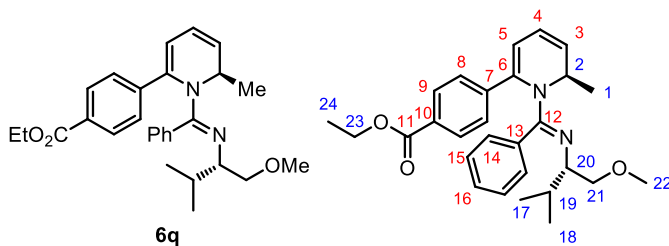

**Ethyl 4-[(6R)-1-[(E)-[(1S)-1-(methoxymethyl)-2-methylpropyl]imino}(phenyl) methyl]-6-methyl-1,6-dihydropyridin-2-yl]benzoate (6q)**: Following general Negishi procedure, the crude 2,6-disubstituted dihydropyridine was purified by chromatography on silica gel (100% Hexanes to 30% AcOEt/Hexanes) and the product (**6q**) was isolated as a yellow oil (312.4 mg, 70% Yield).  $R_f$ : 0.60 (30% EtOAc/Hexanes);  $[\alpha]_D^{25}$ :  $-602$  ( $c = 2.31$ ,  $\text{CHCl}_3$ );  $^1\text{H}$  NMR ( $\text{CHCl}_3$ , 400 MHz):  $\delta$  7.77 (d,  $J = 7.5$  Hz, 2H,  $\text{C}_8\text{-H}$ ), 7.11-7.08 (br m, 7H,  $\text{C}_9\text{-}14\text{-}15\text{-}16\text{-H}$ ), 6.12 (dd,  $J = 5.0, 9.5$  Hz, 1H,  $\text{C}_4\text{-H}$ ), 5.80 (dd,  $J = 3.5, 9.5$  Hz, 1H,  $\text{C}_3\text{-H}$ ), 5.69 (d,  $J = 5.0$  Hz, 1H,  $\text{C}_5\text{-H}$ ), 5.32-5.12 (m, 1H,  $\text{C}_2\text{-H}$ ), 4.37 (q,  $J = 7.0$  Hz, 2H,  $\text{C}_{23}\text{-H}$ ), 3.59 (dd,  $J = 7.0, 10.0$  Hz, 1H,  $\text{C}_{21}\text{-H}$ ), 3.44 (dd,  $J = 7.5, 10.0$  Hz, 1H,  $\text{C}_{21}\text{-H}$ ), 3.41 (s, 3H,  $\text{C}_{22}\text{-H}$ ), 3.14-3.10 (m, 1H,  $\text{C}_{20}\text{-H}$ ), 1.60-1.52 (m, 1H,  $\text{C}_{19}\text{-H}$ ), 1.40 (t,  $J = 7.0$  Hz, 3H,  $\text{C}_{24}\text{-H}$ ) 1.24 (d,  $J =$

6.5 Hz, 3H,  $C_1$ -H), 0.67 (d,  $J = 7.0$  Hz, 3H,  $C_{17}$ -H), 0.51 (d,  $J = 6.5$  Hz, 3H,  $C_{18}$ -H);  $^{13}\text{C}$  NMR ( $\text{CHCl}_3$ , 100 MHz):  $\delta$  167.0 ( $C_{11}$ ), 160.2 ( $C_{12}$ ), 145.4 ( $C_{13}$ ), 139.4 ( $C_7$ ), 134.2 ( $C_{10}$ ), 129.5 ( $C_8$ ), 128.9 ( $C_{14}$ ), 128.7 (2) ( $C_{15-16}$ ), 128.4 ( $C_6$ ), 126.3 ( $C_9$ ), 126.2 ( $C_3$ ), 122.3 ( $C_4$ ), 111.5 ( $C_5$ ), 76.4 ( $C_{21}$ ), 64.2 ( $C_{20}$ ), 61.2 ( $C_{23}$ ), 59.6 ( $C_{22}$ ), 51.1 ( $C_2$ ), 31.6 ( $C_{19}$ ), 20.2 ( $C_{18}$ ), 18.1 ( $C_1$ ), 17.7 ( $C_{17}$ ), 14.7 ( $C_{24}$ ); FTIR ( $\text{cm}^{-1}$ ) (neat): 3039, 2958, 2923, 2872, 1714, 1618, 1265, 1100, 772, 714, 700; HRMS (ESI, Pos): calcd for  $\text{C}_{28}\text{H}_{34}\text{N}_2\text{O}_3$   $[\text{M}+\text{H}]^+$ : 447.2642  $m/z$ , found: 447.2651  $m/z$ .

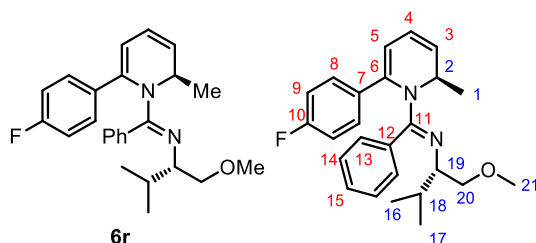

**(2S)-N-[(1E)-[(2R)-6-(4-fluorophenyl)-2-methylpyridin-1(2H)-yl]-1-methoxy-3-methylbutan-2-amine (6r):** Following general Negishi procedure, the crude 2,6-disubstituted dihydropyridine was purified by chromatography on silica gel (100% Hexanes to 35% AcOEt/Hexanes) and the product (**6r**) was isolated as a yellow oil (258.0 mg, 66% Yield).  $R_f$ : 0.60 (30% EtOAc/Hexanes);  $[\alpha]_D^{25}$ :  $-674.0$  ( $c = 1.87$ ,  $\text{CHCl}_3$ );  $^1\text{H}$  NMR ( $\text{CHCl}_3$ , 400 MHz):  $\delta$  7.27-6.66 (br m, 9H,  $C_{8-9-13-14-15}$ -H), 6.11 (dd,  $J = 5.0, 9.0$  Hz, 1H,  $C_4$ -H), 5.77 (dd,  $J = 5.5, 9.0$  Hz, 1H,  $C_3$ -H), 5.55 (d,  $J = 5.0$  Hz, 1H,  $C_5$ -H), 5.26-5.20 (m, 1H,  $C_2$ -H), 3.59 (dd,  $J = 5.0, 9.5$  Hz, 1H,  $C_{20}$ -H), 3.46 (dd,  $J = 7.5, 9.5$  Hz, 1H,  $C_{20}$ -H), 3.41 (s, 3H,  $C_{21}$ -H), 3.16-3.11 (m, 1H,  $C_{19}$ -H), 1.62-1.54 (m, 1H,  $C_{18}$ -H), 1.24 (d,  $J = 3.0$  Hz, 3H,  $C_1$ -H), 0.70 (d,  $J = 7.0$  Hz, 3H,  $C_{16}$ -H), 0.53 (d,  $J = 7.0$  Hz, 3H,  $C_{17}$ -H);  $^{13}\text{C}$  NMR ( $\text{CHCl}_3$ , 100 MHz):  $\delta$  161.6 (d,  $J = 245.0$  Hz,  $J_{\text{C-F}}$ ) ( $C_{10}$ ), 159.5 ( $C_{11}$ ), 138.5 ( $C_{12}$ ), 136.4 (d,  $J = 4.0$  Hz,  $J_{\text{C-F}}$ ) ( $C_7$ ), 133.8 ( $C_6$ ), 129.9 ( $C_{15}$ ), 127.5 ( $C_{14}$ ), 127.4 (d,  $J = 12.0$  Hz,  $J_{\text{C-F}}$ ) ( $C_8$ ), 127.4 ( $C_{13}$ ), 124.4 ( $C_3$ ), 121.6 ( $C_4$ ), 114.2 (d,  $J = 21.0$  Hz,  $J_{\text{C-F}}$ ) ( $C_9$ ), 108.9 ( $C_5$ ), 75.7 ( $C_{20}$ ), 63.4 ( $C_{21}$ ), 58.8 ( $C_{19}$ ), 50.5 ( $C_2$ ), 30.9 ( $C_{18}$ ), 19.5 ( $C_{17}$ ), 17.2 ( $C_1$ ), 17.0 ( $C_{16}$ );  $^{19}\text{F}$  NMR ( $\text{CHCl}_3$ , 375.5 MHz):  $\delta$   $-115.9$  (F); FTIR ( $\text{cm}^{-1}$ ) (neat): 3040, 2961, 2890, 1619, 1505, 1315, 1267, 701; HRMS (ESI, Pos): calcd for  $\text{C}_{25}\text{H}_{30}\text{FN}_2\text{O}$   $[\text{M}+\text{H}]^+$ : 393.2338  $m/z$ , found: 393.2347  $m/z$ .

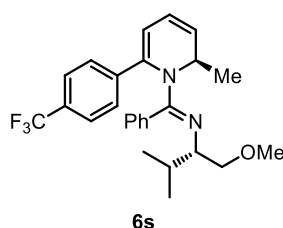

**(2S)-1-methoxy-3-methyl-N-[(1E)-[(2R)-2methyl-6-[4-(trifluoromethyl)phenyl]pyridine-1(2H)-yl](phenyl)methylene]butan-2-amine (6s):** Following the general Negishi procedure, the crude 2,6-disubstituted dihydropyridine was purified by chromatography on silica gel (100% Hexanes to 30% AcOEt/Hexanes) and the product (**6s**) was isolated as a yellow oil (290.0 mg, 66% Yield).  $R_f$ : 0.70 (30% EtOAc/Hexanes);  $[\alpha]_D^{25}$ :  $-676.4$  ( $c = 2.35$ ,  $\text{CHCl}_3$ );  $^1\text{H}$  NMR ( $\text{CHCl}_3$ , 400 MHz):  $\delta$  7.35 (d,  $J = 4.5$  Hz, 2H), 7.16-6.61 (br m, 7H), 6.13 (dd,  $J = 6.0, 9.5$  Hz, 1H), 5.82 (dd,  $J = 6.0, 9.0$  Hz, 1H), 5.69 (d,  $J = 5.0$  Hz, 1H), 5.25-5.11

(m, 1H), 3.58 (dd,  $J = 5.0, 9.5$  Hz, 1H), 3.45 (dd,  $J = 7.5, 9.0$  Hz, 1H), 3.41 (s, 1H), 3.15-3.11 (m, 1H), 1.59-1.51 (m, 1H), 1.25 (d,  $J = 7.0$  Hz, 3H), 0.66 (d,  $J = 7.0$  Hz, 3H), 0.51 (d,  $J = 6.5$  Hz, 3H);  $^{13}\text{C NMR}$  ( $\text{CHCl}_3$ , 100 MHz):  $\delta$  159.2, 143.7, 138.2, 133.5, 128.3 (q,  $J = 32.0$  Hz,  $J_{\text{C-F}}$ ), 127.7, 127.5, 125.9 (2), 125.5, 124.3 (q,  $J = 3.4$  Hz,  $J_{\text{C-F}}$ ), 123.8 (q,  $J = 270$  Hz,  $J_{\text{C-F}}$ ), 121.5, 110.7, 75.6, 63.5, 58.8, 50.2, 30.8, 19.4, 17.3, 16.9;  $^{19}\text{F NMR}$  ( $\text{CHCl}_3$ , 97.07 MHz):  $\delta$  -62.9 ( $\text{CF}_3$ ); **FTIR** ( $\text{cm}^{-1}$ ) (neat): 2961, 2890, 2245, 1617, 1599, 1557, 1324, 1126, 908, 733; **HRMS** (ESI, Pos): calcd for  $\text{C}_{26}\text{H}_{30}\text{F}_3\text{N}_2\text{O}$   $[\text{M}+\text{H}]^+$ : 443.2305  $m/z$ , found: 443.2318  $m/z$ .

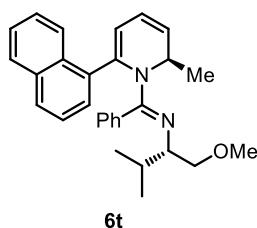

**(2S)-1-methoxy-3-methyl-N-[(1E)-[(2R)-2-methyl-6-(1-naphthyl)pyridine-1(2H)-yl](phenyl)methylene]butan-2-amine (6t):**

Following the general Negishi procedure, the crude 2,6-disubstituted dihydropyridine was purified by chromatography on silica gel (100% Hexanes to 15% AcOEt/Hexanes) and the product (**6t**) was isolated as a yellow oil (324.0 mg, 76% Yield).  $R_f$ : 0.40 (30% EtOAc/Hexanes);  $[\alpha]_D^{25}$ : -337.4 ( $c = 2.2$ ,  $\text{CHCl}_3$ );  $^1\text{H NMR}$  ( $\text{CHCl}_3$ , 300 MHz):  $\delta$  8.14 (br d,  $J = 8.5$  Hz, 1H), 7.67 (d,  $J = 8.5$  Hz, 1H), 7.57 (d,  $J = 8.0$  Hz, 1H), 7.38-6.38 (br m, 9H), 6.19 (dd,  $J = 5.5, 9.5$  Hz, 1H), 5.79 (dd,  $J = 6.5, 9.5$  Hz, 1H), 5.60 (d,  $J = 5.5$  Hz, 1H), 5.40-5.31 (m, 1H), 3.51 (dd,  $J = 5.0, 9.5$  Hz, 1H), 3.33-3.27 (m, 4H), 2.98-2.92 (m, 1H), 1.58-1.50 (m, 1H), 1.46 (d,  $J = 6.5$  Hz, 3H), 0.67 (d,  $J = 6.0$  Hz, 3H), 0.49 (d,  $J = 8.5$  Hz, 3H);  $^{13}\text{C NMR}$  ( $\text{CHCl}_3$ , 75 MHz):  $\delta$  159.7, 137.7, 134.3, 133.5, 130.8, 128.8 (2), 127.6, 127.5, 127.2, 126.1, 125.2, 125.0, 124.9, 123.7, 122.0, 111.2, 75.9, 63.5, 59.2, 51.6, 31.0, 19.9, 17.8, 17.2 \*Note: Two of the "Ph" carbons of the amidine are too broad to be identified/assigned properly at 25°C in  $\text{CDCl}_3$ \*; **FTIR** ( $\text{cm}^{-1}$ ) (neat): 2958, 2923, 1617, 1555, 1445, 1383; **HRMS** (ESI, Pos): calcd for  $\text{C}_{29}\text{H}_{33}\text{N}_2\text{O}$   $[\text{M}+\text{H}]^+$ : 425.2593  $m/z$ , found: 425.2598  $m/z$ .

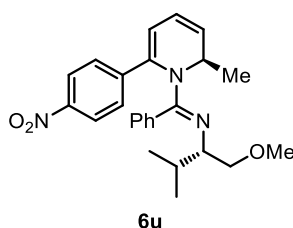

**(2S)-1-methoxy-3-methyl-N-[(1E)-[(2R)-2-methyl-6-(4-nitrophenyl)pyridin-1(2H)-yl](phenyl)methylene]butan-2-amine (6u):**

Following the general Negishi procedure, the crude 2,6-disubstituted dihydropyridine was purified by chromatography on silica gel (100% Hexanes to 30% AcOEt/Hexanes) and the product (**6u**) was isolated as a yellow oil (215.0 mg, 51% Yield).  $R_f$ : 0.65 (30% EtOAc/Hexanes);  $[\alpha]_D^{25}$ : -663.0 ( $c = 0.27$ ,  $\text{CHCl}_3$ );  $^1\text{H NMR}$  ( $\text{CHCl}_3$ , 400 MHz):  $\delta$  7.96 (d,  $J = 9.0$  Hz, 2H), 7.28-6.92 (br m, 7H), 6.14 (dd,  $J = 5.5, 9.5$  Hz, 1H), 5.85-5.84 (m, 1H), 5.76 (d,  $J = 5.0$  Hz, 1H), 5.18 (br m, 1H), 3.55 (dd,  $J = 4.5, 9.5$

Hz, 1H), 3.45 (dd,  $J = 8.0, 9.5$  Hz, 1H), 3.40 (s, 3H), 3.14-3.10 (m, 1H), 1.57-1.49 (m, 1H), 1.24 (d,  $J = 7.0$  Hz, 3H), 0.64 (d,  $J = 7.0$  Hz, 3H), 0.50 (d,  $J = 6.5$  Hz, 3H);  $^{13}\text{C NMR}$  ( $\text{CHCl}_3$ , 100 MHz):  $\delta$  160.2, 147.8, 147.1, 138.8, 134.3, 131.3, 129.2, 128.5, 127.8, 127.3, 124.1, 122.6, 113.3, 76.8, 64.8, 60.0, 51.5, 32.1, 20.6, 18.7, 18.2. **FTIR** ( $\text{cm}^{-1}$ ) (neat): 2962, 2253, 1620, 1598, 1556, 1515, 1384, 1343; **HRMS** (ESI, Pos): calcd for  $\text{C}_{25}\text{H}_{30}\text{N}_3\text{O}_3$   $[\text{M}+\text{H}]^+$ : 420.2282  $m/z$ , found: 420.2289  $m/z$ .

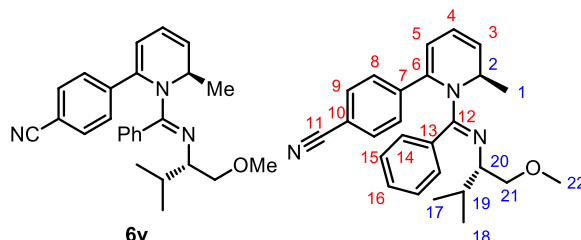

**4-{(6*R*)-1-[(*E*)-{(1*S*)-1-(methoxymethyl)-2-methylpropyl]imino}(phenyl)methyl]-6-methyl-1,6-dihydropyridin-2-yl}benzonitrile (6v)**:

Following the general Negishi procedure, the crude 2,6-disubstituted dihydropyridine was purified by chromatography on silica gel (100% Hexanes to 20% AcOEt/Hexanes) and the product (**6v**) was isolated as a yellow oil (306.7 mg, 77% Yield).  $R_f$ : 0.60 (30% EtOAc/Hexanes);  $[\alpha]_D^{25}$ :  $-652.3$  ( $c = 3.00$ ,  $\text{CHCl}_3$ );  $^1\text{H NMR}$  ( $\text{CHCl}_3$ , 300 MHz):  $\delta$  7.36 (d,  $J = 8.5$  Hz, 2H,  $\text{C}_8\text{-H}$ ), 7.14-6.74 (br m, 5H,  $\text{C}_{14-16}\text{-H}$ ), 7.11-7.05 (m, 2H,  $\text{C}_9\text{-H}$ ), 6.11 (dd,  $J = 5.0, 9.0$  Hz, 1H,  $\text{C}_4\text{-H}$ ), 5.80 (dd,  $J = 6.5, 9.5$  Hz, 1H,  $\text{C}_3\text{-H}$ ), 5.69 (d,  $J = 5.0$  Hz, 1H,  $\text{C}_5\text{-H}$ ), 5.19-5.09 (m, 1H,  $\text{C}_2\text{-H}$ ), 3.54 (dd,  $J = 5.0, 10.0$  Hz, 1H,  $\text{C}_{21}\text{-H}$ ), 3.43 (dd,  $J = 8.0, 8.5$  Hz, 1H,  $\text{C}_{21}\text{-H}$ ), 3.38 (s, 3H,  $\text{C}_{22}\text{-H}$ ), 3.10 (ddd,  $J = 5.0, 8.0, 10.0$  Hz, 1H,  $\text{C}_{20}\text{-H}$ ), 1.57-1.46 (m, 1H,  $\text{C}_{19}\text{-H}$ ), 1.21 (d,  $J = 6.5$  Hz, 3H,  $\text{C}_1\text{-H}$ ), 0.62 (d,  $J = 7.0$  Hz, 3H,  $\text{C}_{17}\text{-H}$ ), 0.48 (d,  $J = 7.0$  Hz, 3H,  $\text{C}_{18}\text{-H}$ );  $^{13}\text{C NMR}$  ( $\text{CHCl}_3$ , 100 MHz):  $\delta$  159.8 ( $\text{C}_{12}$ ), 145.5 ( $\text{C}_{13}$ ), 138.6 ( $\text{C}_7$ ), 134.0 ( $\text{C}_{10}$ ), 132.1 ( $\text{C}_8$ ), 131.0 ( $\text{C}_{16}$ ), 128.6 ( $\text{C}_{14}$ ), 127.0 ( $\text{C}_3$ ), 126.9 ( $\text{C}_9$ ), 123.0 ( $\text{C}_{15}$ ), 122.2 ( $\text{C}_4$ ), 119.6 ( $\text{C}_6$ ), 112.3 ( $\text{C}_5$ ), 110.3 ( $\text{C}_{11}$ ), 76.4 ( $\text{C}_{21}$ ), 64.3 ( $\text{C}_{20}$ ), 59.6 ( $\text{C}_{22}$ ), 51.0 ( $\text{C}_2$ ), 31.7 ( $\text{C}_{19}$ ), 20.2 ( $\text{C}_{18}$ ), 18.2 ( $\text{C}_1$ ), 17.8 ( $\text{C}_{17}$ ); **FTIR** ( $\text{cm}^{-1}$ ) (neat): 3040, 2960, 2922, 2890, 2225, 1619, 1604, 1315, 1268, 1112, 702; **HRMS** (ESI, Pos): calcd for  $\text{C}_{26}\text{H}_{30}\text{N}_3\text{O}$   $[\text{M}+\text{H}]^+$ : 400.2383  $m/z$ , found: 400.2391  $m/z$ .

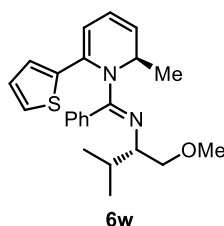

**(2*S*)-1-methoxy-3-methyl-*N*-[(1*E*)-[(2*R*)-2-methyl-6-(2-thienyl)pyridin-1(2*H*)-yl]**

**(phenyl)methylene]butan-2-amine (6w)**: Following the general Negishi procedure, the crude 2,6-disubstituted dihydropyridine was purified by chromatography on silica gel (100% Hexanes to 30% AcOEt/Hexanes) and the product (**6w**) was isolated as a yellow oil (209.9 mg, 55% Yield);  $R_f$ : 0.80 (30% EtOAc/Hexanes);  $[\alpha]_D^{25}$ :  $-574$  ( $c = 0.316$ ,  $\text{CHCl}_3$ );  $^1\text{H NMR}$  ( $\text{CHCl}_3$ , 400 MHz):  $\delta$  7.23-6.94 (br m, 6H), 6.84-6.77 (m, 2H), 6.13-6.08 (dd,  $J = 5.5, 9.0$  Hz, 1H), 5.77-5.72 (m, 2H), 5.10-5.00 (m, 1H), 3.60 (dd,  $J = 5.0, 9.5$  Hz, 1H), 3.47 (dd,  $J = 7.5, 9.5$  Hz, 1H), 3.41 (s, 3H), 3.19-3.15 (m, 1H), 1.62-1.54 (m, 1H), 1.20 (d,  $J = 7.0$  Hz,

3H), 0.69 (d,  $J = 7.0$  Hz, 3H), 0.52 (d,  $J = 7.0$  Hz, 3H);  $^{13}\text{C}$  NMR ( $\text{CHCl}_3$ , 75 MHz):  $\delta$  160.1, 144.6, 133.8, 133.6, 128.6, 127.8, 127.4, 126.8, 125.4, 124.5, 124.2, 122.1, 109.7, 76.0, 63.9, 59.3, 51.0, 31.2, 19.8, 17.8, 17.3; FTIR ( $\text{cm}^{-1}$ ) (neat): 2958, 2923, 2892, 2873, 1620, 1555, 1445; HRMS (ESI, Pos): calcd for  $\text{C}_{23}\text{H}_{29}\text{N}_2\text{OS}$   $[\text{M}+\text{H}]^+$ : 381.2001  $m/z$ , found: 381.2000  $m/z$ .

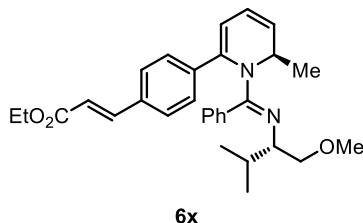

**(E)-Ethyl-3-(4-((R)-1-((E)-(((S)-1-methoxy-3-methylbutan-2-yl)imino)(phenyl)methyl)-6-methyl-1,6-dihydropyridin-2-yl)phenyl)acrylate (6x):** Following the general Negishi procedure, the crude 2,6-disubstituted dihydropyridine was purified by chromatography on silica gel (100% Hexanes to 30% AcOEt/Hexanes) and the product (**6x**) was isolated as a yellow oil (328 mg, 70% Yield);  $R_f$ : 0.30 (20% EtOAc/Hexanes);  $[\alpha]_D^{25}$ :  $-531$  ( $c = 0.70$ ,  $\text{CHCl}_3$ );  $^1\text{H}$  NMR ( $\text{CHCl}_3$ , 400 MHz):  $\delta$  7.60 (d,  $J = 16.0$  Hz, 1H), 7.25 (d,  $J = 8.5$  Hz, 2H), 7.35-6.65 (br m, 5H), 7.12-7.01 (m, 2H), 6.36 (d,  $J = 16.0$  Hz, 1H), 6.12 (dd,  $J = 5.0, 8.5$  Hz, 1H), 5.79 (dd,  $J = 3.0, 8.5$  Hz, 1H), 5.67 (d,  $J = 5.0$  Hz, 1H), 5.20 (br s, 1H), 4.28 (q,  $J = 7.0$  Hz, 2H), 3.58 (dd,  $J = 5.0, 9.5$  Hz, 1H), 3.45 (dd,  $J = 7.5, 9.5$  Hz, 1H), 3.41 (s, 3H), 3.14-3.10 (m, 1H), 1.60-1.51 (m, 1H), 1.36 (t,  $J = 7.0$  Hz, 3H), 1.23 (d,  $J = 7.0$  Hz, 3H), 0.66 (d,  $J = 6.5$  Hz, 3H), 0.50 (d,  $J = 6.5$  Hz, 3H);  $^{13}\text{C}$  NMR ( $\text{CHCl}_3$ , 100 MHz):  $\delta$  166.8, 159.4, 143.9 (2), 142.2, 138.8, 133.5, 132.5, 130.1 (br), 127.5, 127.3, 127.2 (br), 126.1, 125.2, 121.6, 117.1, 75.7, 63.4, 60.1, 58.8, 50.3, 30.8, 19.4, 17.3, 16.9, 14.0; FTIR ( $\text{cm}^{-1}$ ) (neat): 2960, 2924, 2891, 1713, 1632, 1601, 1562, 1366, 1311, 1267; HRMS (ESI, Pos): calcd for  $\text{C}_{30}\text{H}_{37}\text{N}_2\text{O}_3$   $[\text{M}+\text{H}]^+$ : 473.2804  $m/z$ , found: 473.2811  $m/z$ .

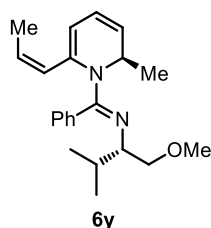

**(2S)-1-methoxy-3-methyl-N-[(1E)-[(2R)-2-methyl-6-[(1Z)-prop-1-en-1-yl]pyridin-1(2H)-yl](phenyl)methylene]butan-2-amine (6y):** Following the general Negishi procedure, the crude 2,6-disubstituted dihydropyridine was purified by chromatography on silica gel (100% Hexanes to 10% AcOEt/Hexanes) and the product (**6y**) was isolated as a yellow oil (259.0 mg, 77% Yield).  $R_f$ : 0.20 (15% EtOAc/Hexanes);  $[\alpha]_D^{25}$ :  $-286.0$  ( $c = 1.51$ ,  $\text{CHCl}_3$ );  $^1\text{H}$  NMR ( $\text{CHCl}_3$ , 300 MHz):  $\delta$  7.27-7.10 (br m, 5H), 6.02 (dd,  $J = 5.0, 9.5$  Hz, 1H), 5.65 (dd,  $J = 6.0, 9.0$  Hz, 1H), 5.32-5.22 (m, 3H), 5.05-4.94 (m, 1H), 3.63 (dd,  $J = 5.0, 10.5$  Hz, 1H), 3.52 (dd,  $J = 7.0, 9.0$  Hz, 1H), 3.41 (s, 3H), 3.31-3.33 (m, 1H), 1.70-1.61 (m, 1H), 1.57 (d,  $J = 7.0$  Hz, 3H), 1.16 (d,  $J = 6.0$  Hz, 3H), 0.79 (d,  $J = 7.0$  Hz, 3H), 0.60 (d,  $J = 7.5$  Hz, 3H);  $^{13}\text{C}$  NMR ( $\text{CHCl}_3$ , 75 MHz):  $\delta$  160.2, 136.6, 135.3, 130.5, 129.8, 129.1, 128.5, 127.3, 124.8,

122.4, 110.5, 77.2, 64.2, 60.0, 51.8, 32.4, 20.8, 18.2, 18.1, 15.8; **FTIR** ( $\text{cm}^{-1}$ ) (neat): 2958, 2922, 2871, 1616, 1598, 1564, 1414, 1384; **HRMS** (ESI, Pos): calcd for  $\text{C}_{22}\text{H}_{31}\text{N}_2\text{O}$   $[\text{M}+\text{H}]^+$ : 339.2436  $m/z$ , found: 339.2441  $m/z$ .



## Diastereoselective hydrogenation of 2,6-disubstituted dihydropyridines (8a-8d)

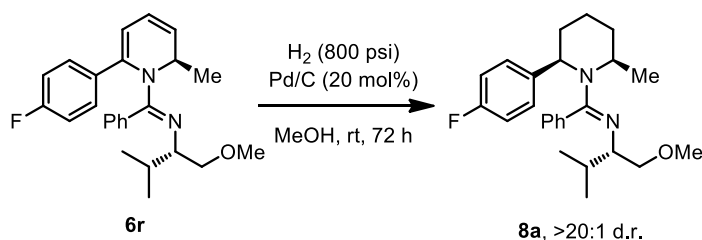

**(2R)-N-[(1E)-[(6R)-2-(4-Fluorophenyl)-6-methylpiperidin-1-yl](phenyl)methylene]-1-methoxy-3-methylbutan-2-amine (8a):** To a 25 mL round bottom flask was added the freshly purified dihydropyridine **6r** (100.0 mg, 0.254 mmol, 1.0 equiv). It was dissolved in anhydrous MeOH (1.0 mL, 0.25 M) and anhydrous Pd/C 10%wt was added to the solution (55 mg, 0.05 mmol, 0.2 equiv). **\*Caution: Dry palladium black is pyrophoric and should always be wet with the appropriate solvent prior to its transfer to the flask or autoclave.\*** The black suspension was stirred for 2 minutes at rt then the flask was transferred to a metal autoclave. The flask was capped with a septa pierced with a needle. The autoclave was sealed and pressurized at 800 psi of hydrogen (with 2 purges). The hydrogenation was stirred at rt for 72 hours (conversion monitored by LCMS). The hydrogen pressure was slowly lowered to ambient pressure and the autoclave was opened to air. The black suspension was then filtered on a Celite® plug and the cake was washed with MeOH thoroughly (~50 mL). The solvent was evaporated to dryness under vacuum and the crude mixture was analyzed by <sup>1</sup>H NMR showing a ratio of >20:1 of diastereoisomers. The crude mixture was then flashed on silica gel using a gradient of 80% EtOAc in hexanes to 10% MeOH in EtOAc and the piperidine **8a** was recuperated as a translucent oil (59 mg, 57% Yield).  $R_f = 0.40$  (15% MeOH/EtOAc);  $[\alpha]_D^{25}$ : +26.1 ( $c = 1.28$ , CHCl<sub>3</sub>); <sup>1</sup>H NMR (CDCl<sub>3</sub>, 400 MHz):  $\delta$  7.49-7.44 (m, 2H), 7.42-7.32 (m, 3H), 7.27-7.23 (m, 2H), 7.01 (app t,  $J = 7.5$  Hz, 2H), 5.75 (br s, 1H), 3.95-3.88 (m, 1H), 3.44 (dd,  $J = 5.5, 9.5$  Hz, 1H), 3.31 (s, 1H), 3.23 (dd,  $J = 7.5, 9.5$  Hz, 1H), 2.89-2.85 (m, 1H), 2.41-2.32 (m, 1H), 1.90-1.79 (m, 2H), 1.72-1.59 (m, 3H), 1.42-1.34 (m, 1H), 0.79 (d,  $J = 6.5$  Hz, 3H), 0.74 (d,  $J = 6.5$  Hz, 3H), 0.72 (d,  $J = 6.5$  Hz, 3H); <sup>13</sup>C NMR (CDCl<sub>3</sub>, 100 MHz):  $\delta$  160.9, 160.8 (d,  $J = 241.5$  Hz,  $J_{C-F}$ ), 140.1 (d,  $J = 3.0$  Hz,  $J_{C-F}$ ), 135.1, 128.1 (d,  $J = 7.5$  Hz,  $J_{C-F}$ ), 127.8, 127.5 (2), 114.0 (d,  $J = 21.0$  Hz,  $J_{C-F}$ ), 76.1, 62.6, 58.6, 49.5, 48.1, 30.4 (2), 26.3, 20.3, 19.8, 17.1, 15.4; <sup>19</sup>F NMR (375.5 MHz, CDCl<sub>3</sub>)  $\delta$  -118.7; FTIR (cm<sup>-1</sup>) (neat): 2933, 2870, 1609, 1593, 1508, 1408, 1341; HRMS (ESI, Pos): calcd for C<sub>25</sub>H<sub>34</sub>N<sub>2</sub>OF [M+H]<sup>+</sup>: 397.2650  $m/z$ , found: 397.2657  $m/z$ .

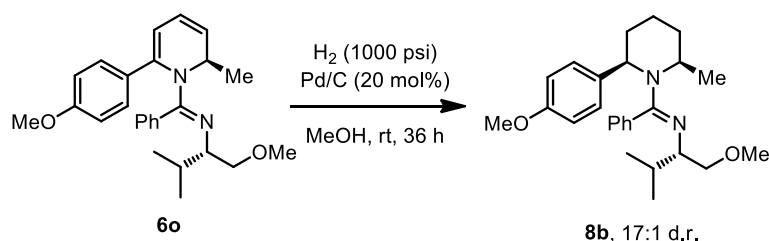

**(2R)-N-[(1E)-[(6R)-2-(4-Methoxyphenyl)-6-methylpiperidin-1-yl](phenyl)methylene]-1-methoxy-3-methylbutan-2-amine (8b):** To a 300 mL stainless steel autoclave was added the freshly purified dihydropyridine **6o** (270.0 mg, 0.668 mmol, 1.0 equiv). It was dissolved in anhydrous MeOH (15.0 mL, 0.05 M) and anhydrous Pd/C 10%wt was added to the solution (142 mg, 0.134 mmol, 0.2 equiv). \***Caution:** Dry palladium black is pyrophoric and should always be wet with the appropriate solvent prior to its transfer to the flask or autoclave.\* The black suspension was stirred for 2 minutes at rt. The autoclave was sealed and pressurized at 1000 psi of hydrogen (with 2 purges). The hydrogenation was stirred at rt for 36 hours. The hydrogen pressure was slowly lowered to ambient pressure and the autoclave was opened to air (conversion monitored by LCMS). The black suspension was then filtered on a Celite® plug and the cake was washed with MeOH thoroughly (~50 mL). The solvent was evaporated to dryness under vacuum and the crude mixture was analyzed by <sup>1</sup>H NMR showing a ratio of 17:1 of diastereoisomers. The crude mixture was then flashed on silica gel using a gradient of 100% Hexanes to 60% EtOAc in Hexanes using a **Isco Gold DIOL 30 g** column pre-equilibrated with 100% Hexanes. The flow rate was set at 40 mL/min and the crude mixture was injected on a prepacked Celite® precolumn. The piperidine **8b** was recuperated as a translucent oil (170 mg, 62% Yield, 17:1 d.r.). **R<sub>f</sub>** = 0.70 (50% EtOAc in Hexanes with Gold DIOL coated TLC plates); **[α]<sub>D</sub><sup>25</sup>**: +41.2 (*c* = 0.958, CHCl<sub>3</sub>); For major diastereoisomer: **<sup>1</sup>H NMR** (CDCl<sub>3</sub>, 700 MHz): δ 7.48-7.31 (m, 5H), 7.31-7.26 (m, 2H). 6.88 (d, *J* = 9.0 Hz, 2H), 5.75-5.63 (m, 1H), 4.00 (br app qn, *J* = 7.5 Hz, 1H), 3.84 (s, 3H), 3.47 (dd, *J* = 5.5, 8.0 Hz, 1H), 3.33 (s, 3H), 3.27 (dd, *J* = 7.0 Hz, 8.0 Hz, 1H), 2.94-2.86 (m, 1H), 2.43-2.34 (m, 1H), 1.97-1.77 (m, 2H), 1.76-1.56 (m, 3H), 1.44-1.35 (m, 1H), 0.84 (d, *J* = 7.0 Hz, 3H), 0.77 (d, *J* = 7.0 Hz, 3H), 0.75 (d, *J* = 7.5 Hz, 3H); **<sup>13</sup>C NMR** (CDCl<sub>3</sub>, 175 MHz): δ 161.4, 157.7, 136.8, 135.7, 128.2, 128.1, 128.0, 127.8, 113.1, 76.5, 63.0, 59.0, 55.2, 49.8, 48.4, 31.1, 30.8, 26.6, 20.4, 20.3, 17.4, 15.9; **FTIR** (cm<sup>-1</sup>) (neat): 2931, 2867, 1608, 1591, 1509, 1282; **HRMS** (ESI, Pos): calcd for C<sub>26</sub>H<sub>37</sub>N<sub>2</sub>O<sub>2</sub> [M+H]<sup>+</sup>: 409.2855 *m/z*, found: 409.2855 *m/z*.

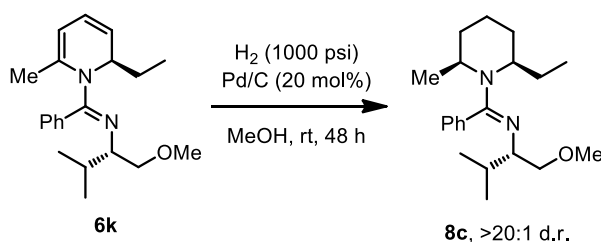

**(2R)-N-[(1E)-[(6R)-2-Ethyl-6-methylpiperidin-1-yl](phenyl)methylene]-1-methoxy-3-methylbutan-2-amine (8c):** To a 20 mL vial with a plastic screwcap pierced with a needle was added the freshly purified dihydropyridine **6k** (170.0 mg, 0.52 mmol, 1.0 equiv). It was dissolved in anhydrous MeOH (10.0 mL, 0.05 M) and anhydrous Pd/C 10% wt was added to the solution (115 mg, 0.104 mmol, 0.2 equiv). \***Caution:** Dry palladium black is pyrophoric and should always be wet with the appropriate solvent prior to its transfer to the flask or autoclave.\* The black suspension was stirred for 2 minutes at rt. The vial was transferred to an autoclave and it was sealed and pressurized at 1000 psi of hydrogen (with 2 purges). The hydrogenation was stirred at rt for 48 hours (conversion monitored by

LCMS). The hydrogen pressure was slowly lowered to ambient pressure and the autoclave was opened to air. The black suspension was then filtered on a Celite® plug and the cake was washed with MeOH thoroughly (~50 mL). The solvent was evaporated to dryness under vacuum and the crude mixture was analyzed by <sup>1</sup>H NMR showing a ratio of >20:1 of diastereoisomers. The crude mixture was then flashed on silica gel using a gradient of 100% Hexanes to 60% EtOAc in Hexanes using a **Isco Gold DIOL 30 g** column pre-equilibrated with 100% Hexanes. The flow rate was set at 40 mL/min and the crude mixture was injected on a prepacked Celite® precolumn. The piperidine **8c** was recuperated as a translucent oil (118 mg, 70% Yield).  $R_f = 0.70$  (30% EtOAc in Hexanes with Gold DIOL coated TLC plates);  $[\alpha]_D^{25}$ : -17.1 ( $c = 0.760$ , CHCl<sub>3</sub>); <sup>1</sup>H NMR (CDCl<sub>3</sub>, 400 MHz): δ 7.39-7.30 (m, 3H), 7.14 (d,  $J = 5.5$  Hz, 2H), 4.17 (very br s, 1H), 3.62 (very br s, 1H), 3.36 (dd,  $J = 5.0, 7.5$  Hz, 1H), 3.20 (s, 3H), 3.12 (dd,  $J = 5.0, 8.0$  Hz, 1H), 2.85-2.81 (m, 1H), 1.80-1.68 (m, 2H), 1.67-1.55 (m, 4H), 1.51-1.43 (m, 3H), 1.14 (d,  $J = 6.0$  Hz, 3H), 0.90 (d,  $J = 6.0$  Hz, 3H), 0.77 (d,  $J = 6.5$  Hz, 3H), 0.71 (br t,  $J = 7.0$  Hz, 3H); <sup>13</sup>C NMR (CDCl<sub>3</sub>, 100 MHz): δ 160.6, 135.8, 128.1, 128.0, 127.5, 76.3, 62.3, 58.8, 53.3, 46.3, 30.8, 30.5, 27.4, 27.0, 20.3, 19.8, 17.2, 15.2, 12.3; FTIR (cm<sup>-1</sup>) (neat): 2957, 2930, 2870, 1608, 1593, 1491, 1344, 1275, 1156; HRMS (ESI, Pos): calcd for C<sub>21</sub>H<sub>35</sub>N<sub>2</sub>O [M+H]<sup>+</sup>: 331.2744 *m/z*, found: 331.2751 *m/z*.

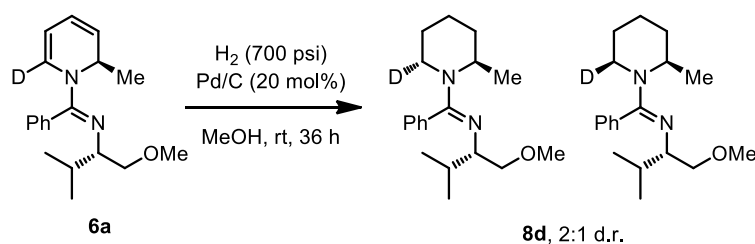

**(2S)-N-[(1E)-[(6R)-2-(Deutero)-6-methylpiperidin-1-yl](phenyl)methylene]-1-methoxy-3-methylbutan-2-amine (8d)**: To a 20 mL vial with a plastic screwcap pierced with a needle was added the freshly purified dihydropyridine **6a** (250.0 mg, 0.836 mmol, 1.0 equiv). It was dissolved in anhydrous MeOH (10.0 mL, 0.083 M) and anhydrous Pd/C 10%wt was added to the solution (178 mg, 0.167 mmol, 0.2 equiv). \***Caution: Dry palladium black is pyrophoric and should always be wet with the appropriate solvent prior to its transfer to the flask or autoclave.**\* The black suspension was stirred for 2 minutes at rt. The vial was transferred to an autoclave and it was sealed and pressurized at 700 psi of hydrogen. The hydrogenation was stirred at rt for 36 hours (conversion monitored by LCMS). The hydrogen pressure was slowly lowered to ambient pressure and the autoclave was opened to air. The black suspension was then filtered on a Celite® plug and the cake was washed with MeOH thoroughly (~50 mL). The solvent was evaporated to dryness under vacuum and the crude mixture was analyzed by <sup>1</sup>H NMR showing a ratio of 2:1 of diastereoisomers favoring the *trans* isomer (see attached nOe analysis). The crude mixture was then flashed on silica gel using a gradient of 100% Hexanes to 60% EtOAc in Hexanes using a **Isco Gold DIOL 30 g** column pre-equilibrated with 100% Hexanes. The flow rate was set at 40 mL/min and the crude mixture was injected on a prepacked Celite® precolumn. The piperidine **8d** was recuperated as a yellow oil (182 mg, 73% Yield for

combined diastereoisomers, 2:1 d.r.).  $R_f = 0.50$  (10% MeOH/EtOAc over silica gel TLC);  $[\alpha]_D^{25}$ :  $-74.7$  ( $c = 1.159$ ,  $\text{CHCl}_3$ );  $^1\text{H NMR}$  ( $\text{CDCl}_3$ , 400 MHz):  $\delta$  7.42-7.31 (m, 3H), 7.22-7.13 (m, 2H), 4.10 (br s, 1H), 3.61 (br s, 1H, minor diastereoisomer), 3.39 (dd,  $J = 5.5, 7.5$  Hz, 1H), 3.23 (s, 3H), 2.90-2.83 (m, 1H), 2.88 (d,  $J = 12.0$  Hz, 1H, major diastereoisomer), 1.75-1.50 (m, 5H), 1.48-1.37 (m, 2H), 1.12 (d,  $J = 7.0$  Hz, 3H), 0.88 (d,  $J = 7.0$  Hz, 3H), 0.78 (d,  $J = 7.0$  Hz, 3H);  $^{13}\text{C NMR}$  ( $\text{CDCl}_3$ , 100 MHz): For major diastereoisomer  $\delta$  160.9, 135.7, 128.2, 128.1, 127.7, 76.4, 62.9, 58.8, 47.0, 40.0 (br t,  $J = 16.5$  Hz, C $\square$ D), 30.7, 30.4, 25.8, 20.1, 19.5, 18.1, 14.6; **FTIR** ( $\text{cm}^{-1}$ ) (neat): 2929, 2868, 1610, 1594, 1401, 1354, 1300, 1244, 1112; **HRMS** (ESI, Pos): calcd for  $\text{C}_{19}\text{H}_{30}\text{DN}_2\text{O}$   $[\text{M}+\text{H}]^+$ : 304.2494  $m/z$ , found: 304.2494  $m/z$ .

Copy of spectra for all synthesized compounds ( $^1\text{H}$ ,  $^{13}\text{C}$ ,  $^{19}\text{F}$ )

Attached selective nOe spectra for **8a-8d**

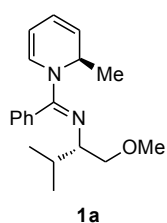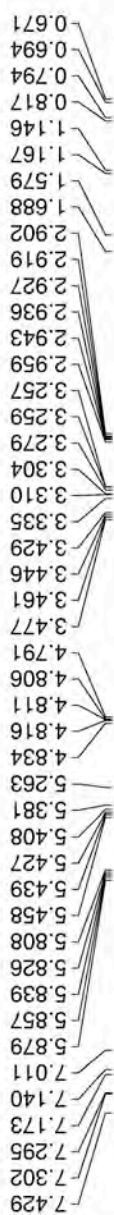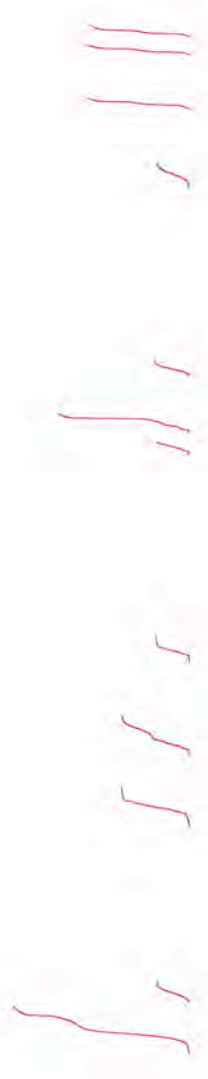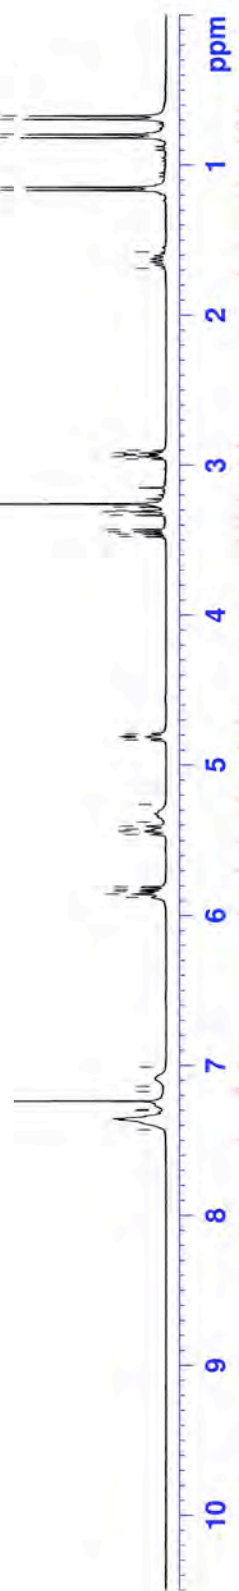

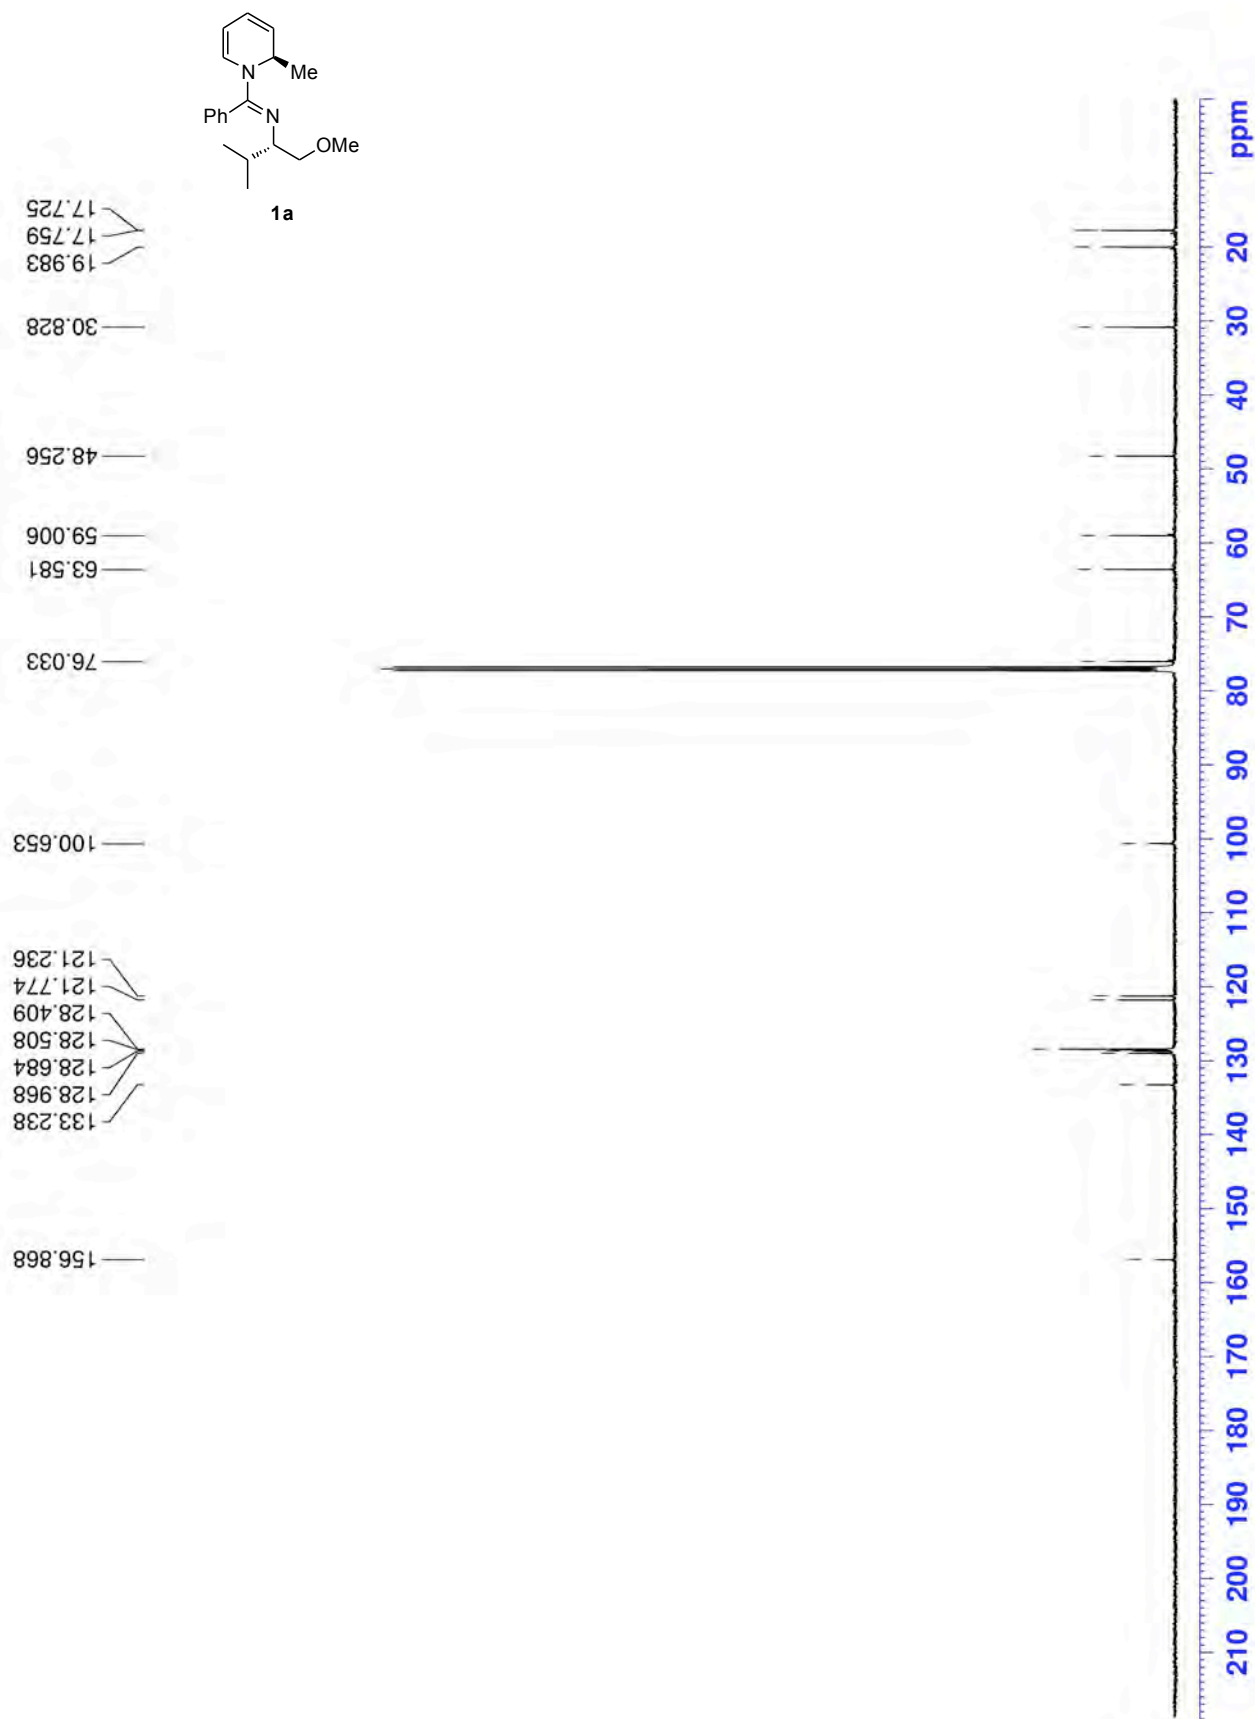

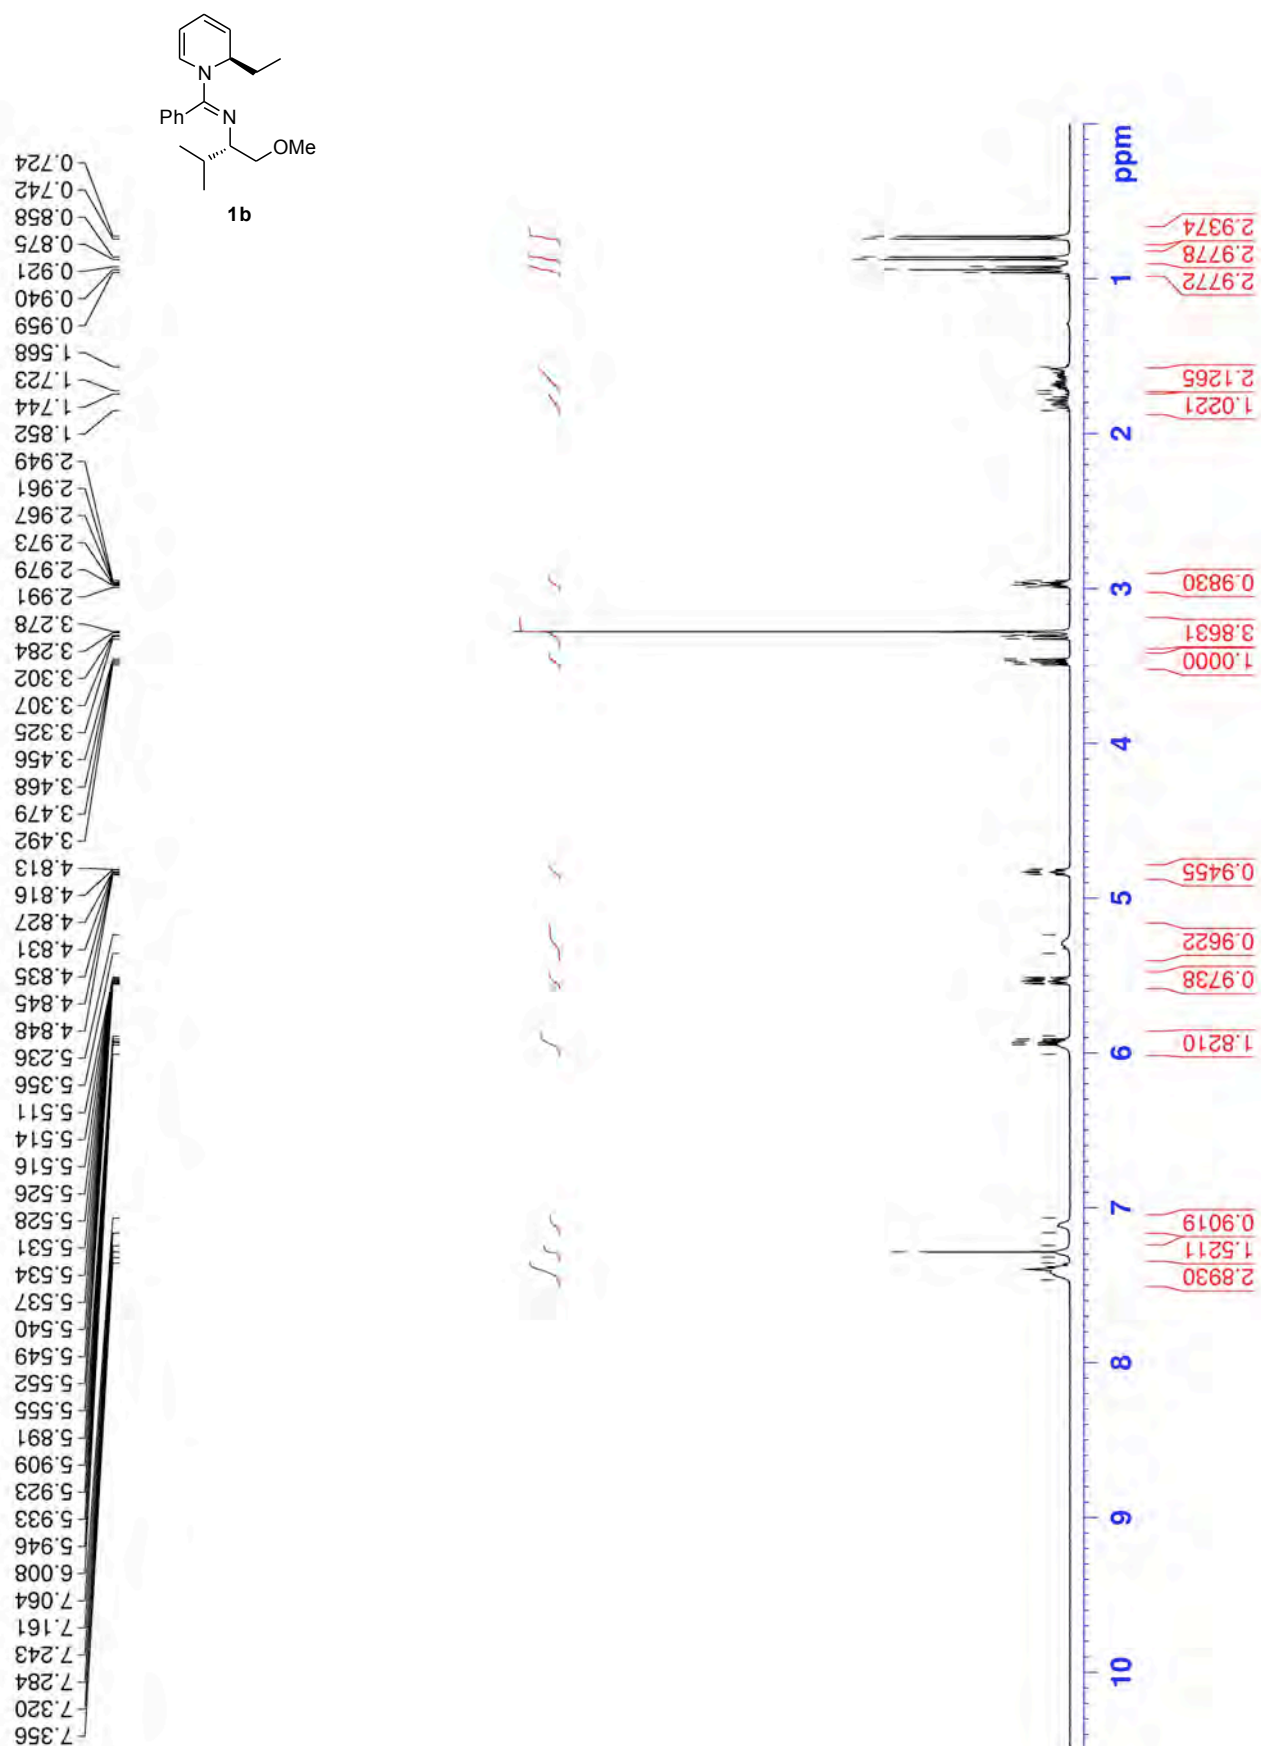



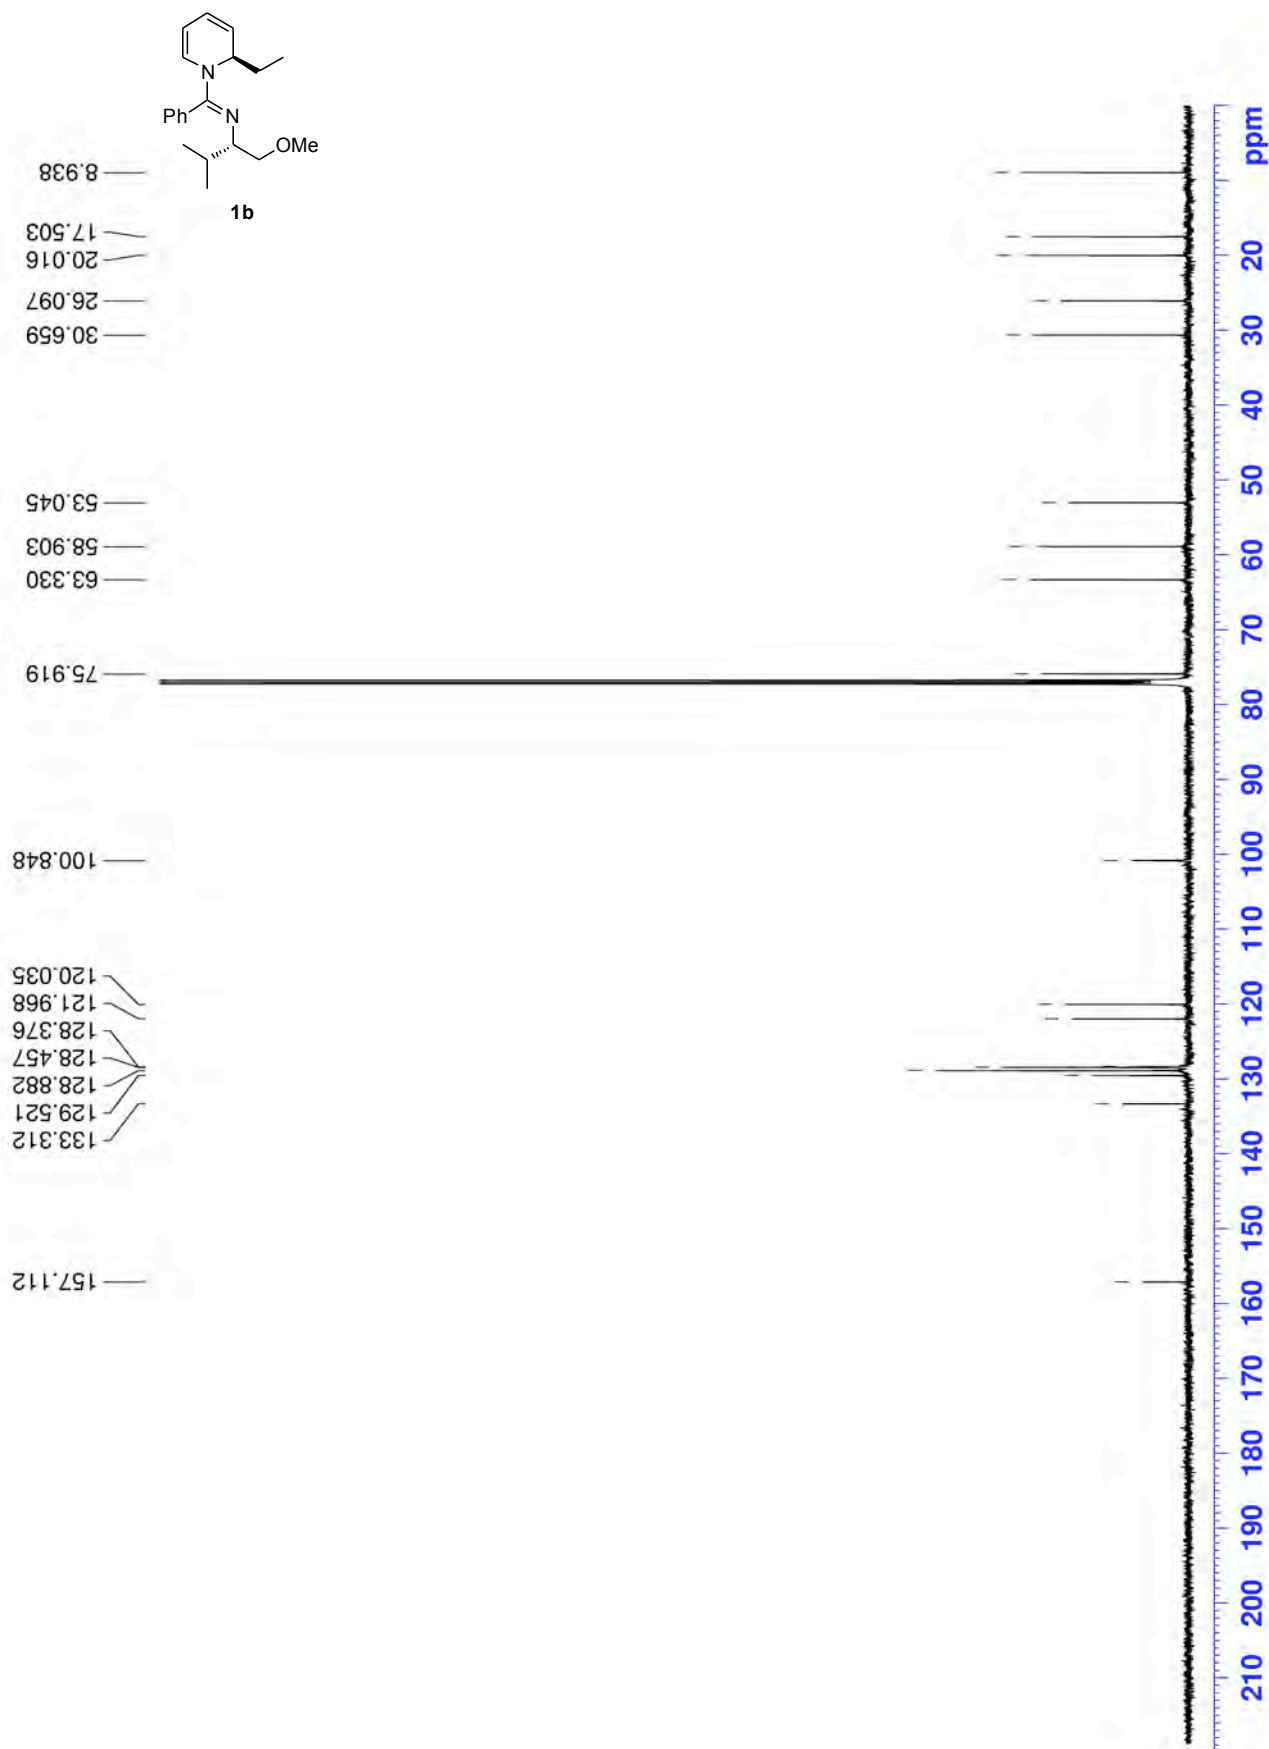

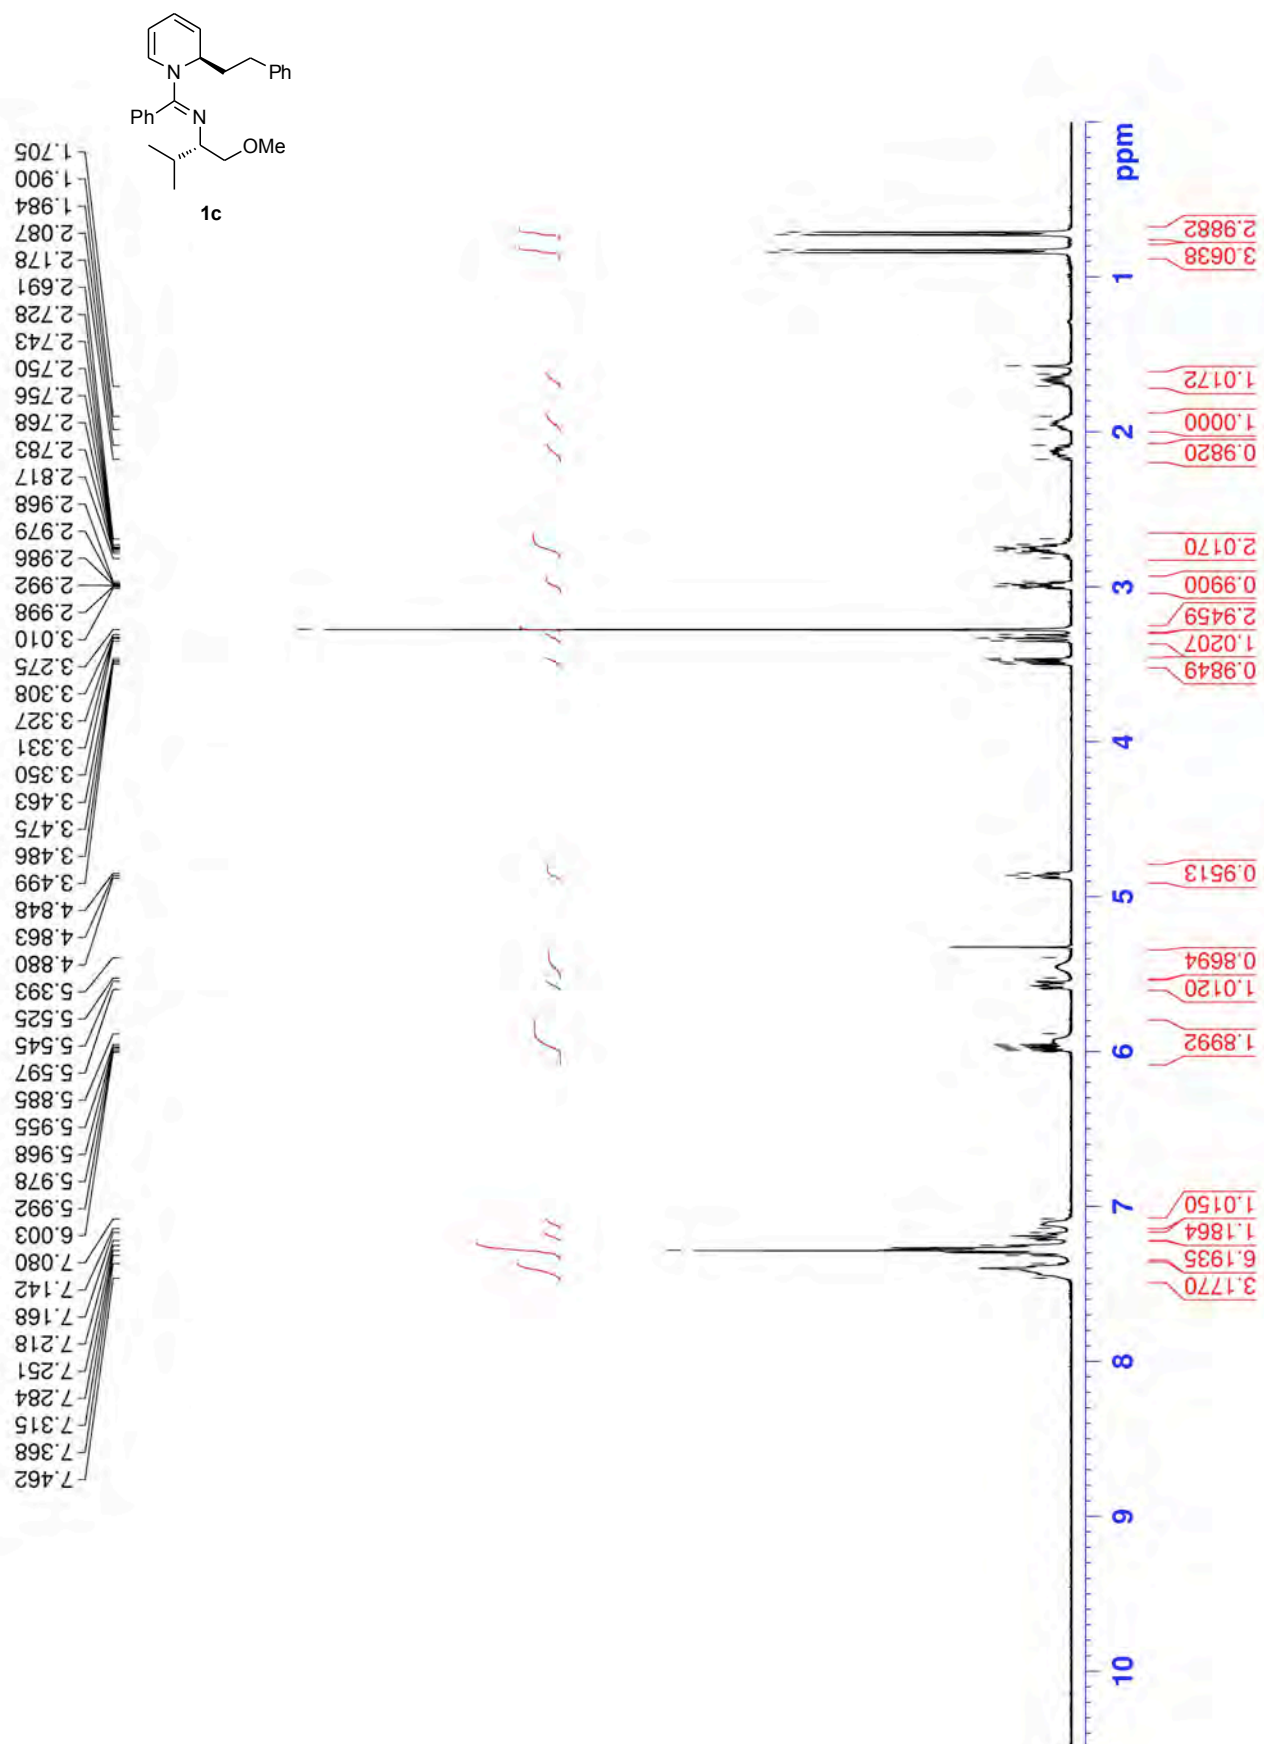

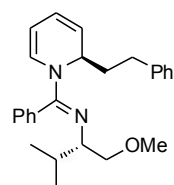**1c**

17.616  
19.988  
30.771  
30.836  
34.496

51.589

58.967

63.447

76.027

100.890

119.802

122.264

125.498

128.215

128.395

128.519

128.872

128.970

129.535

133.121

142.837

156.955

ppm

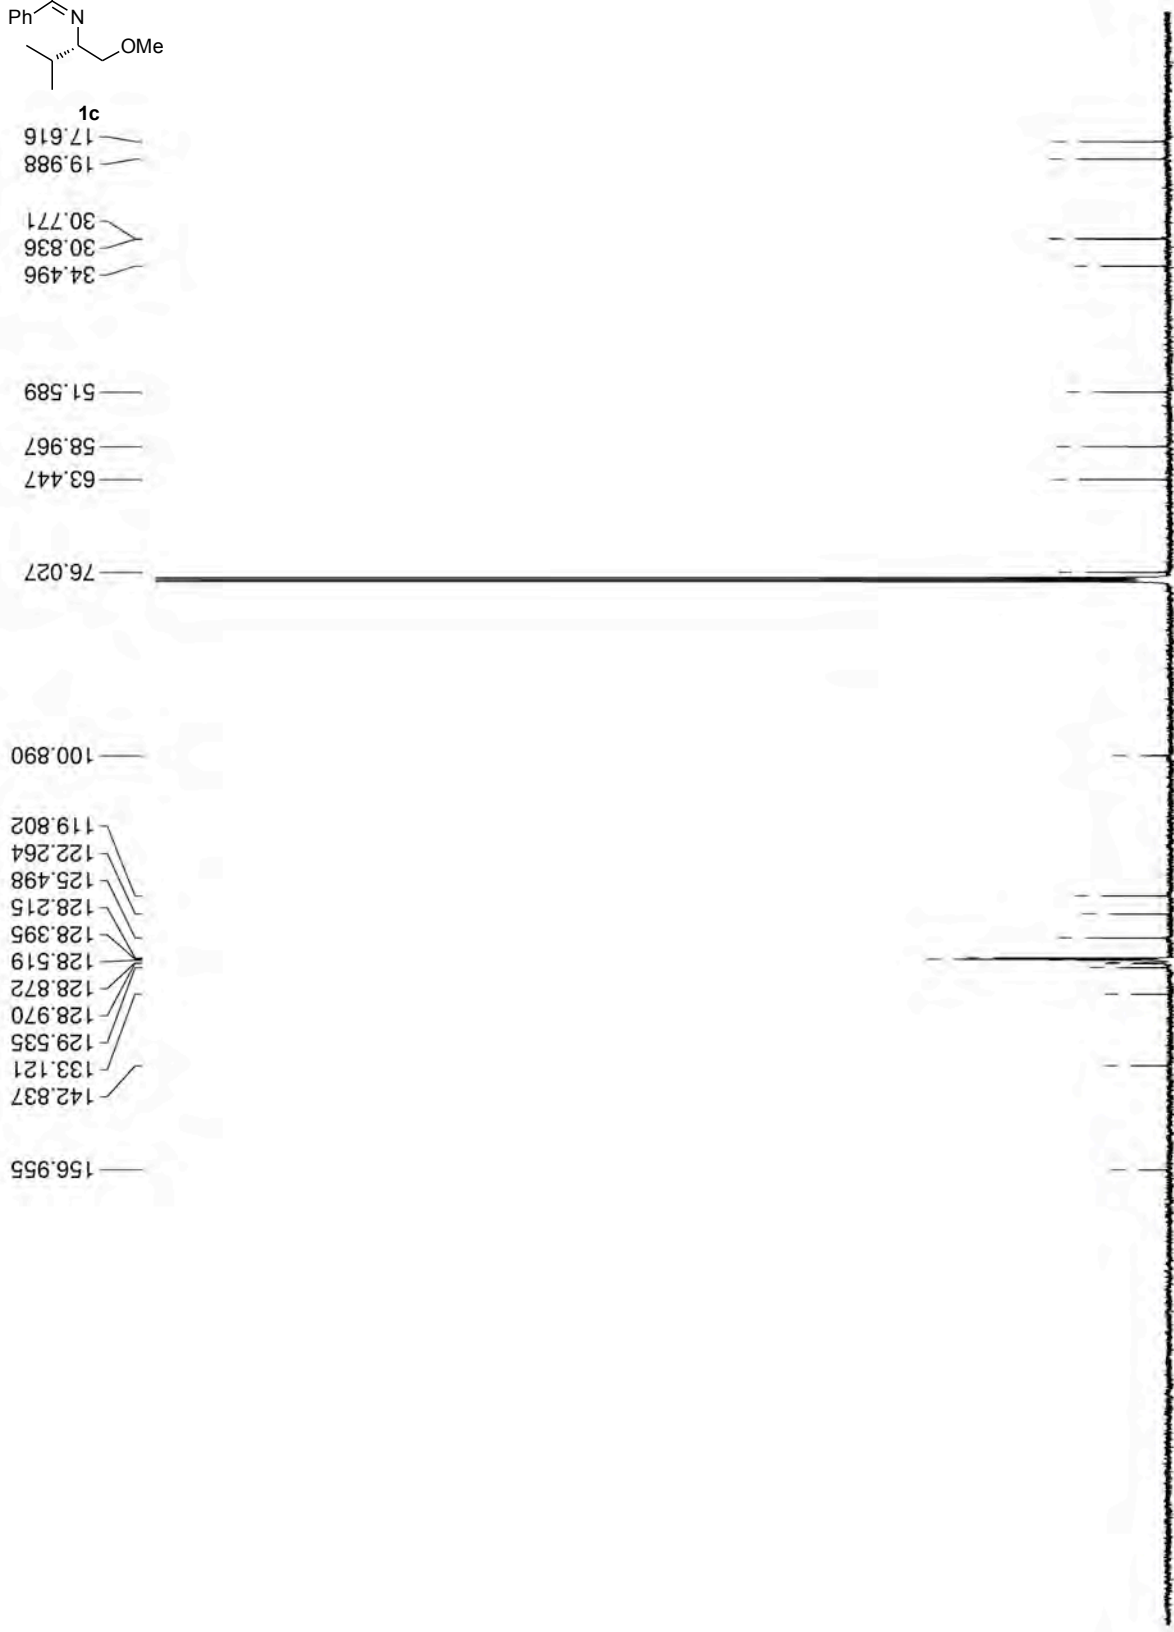

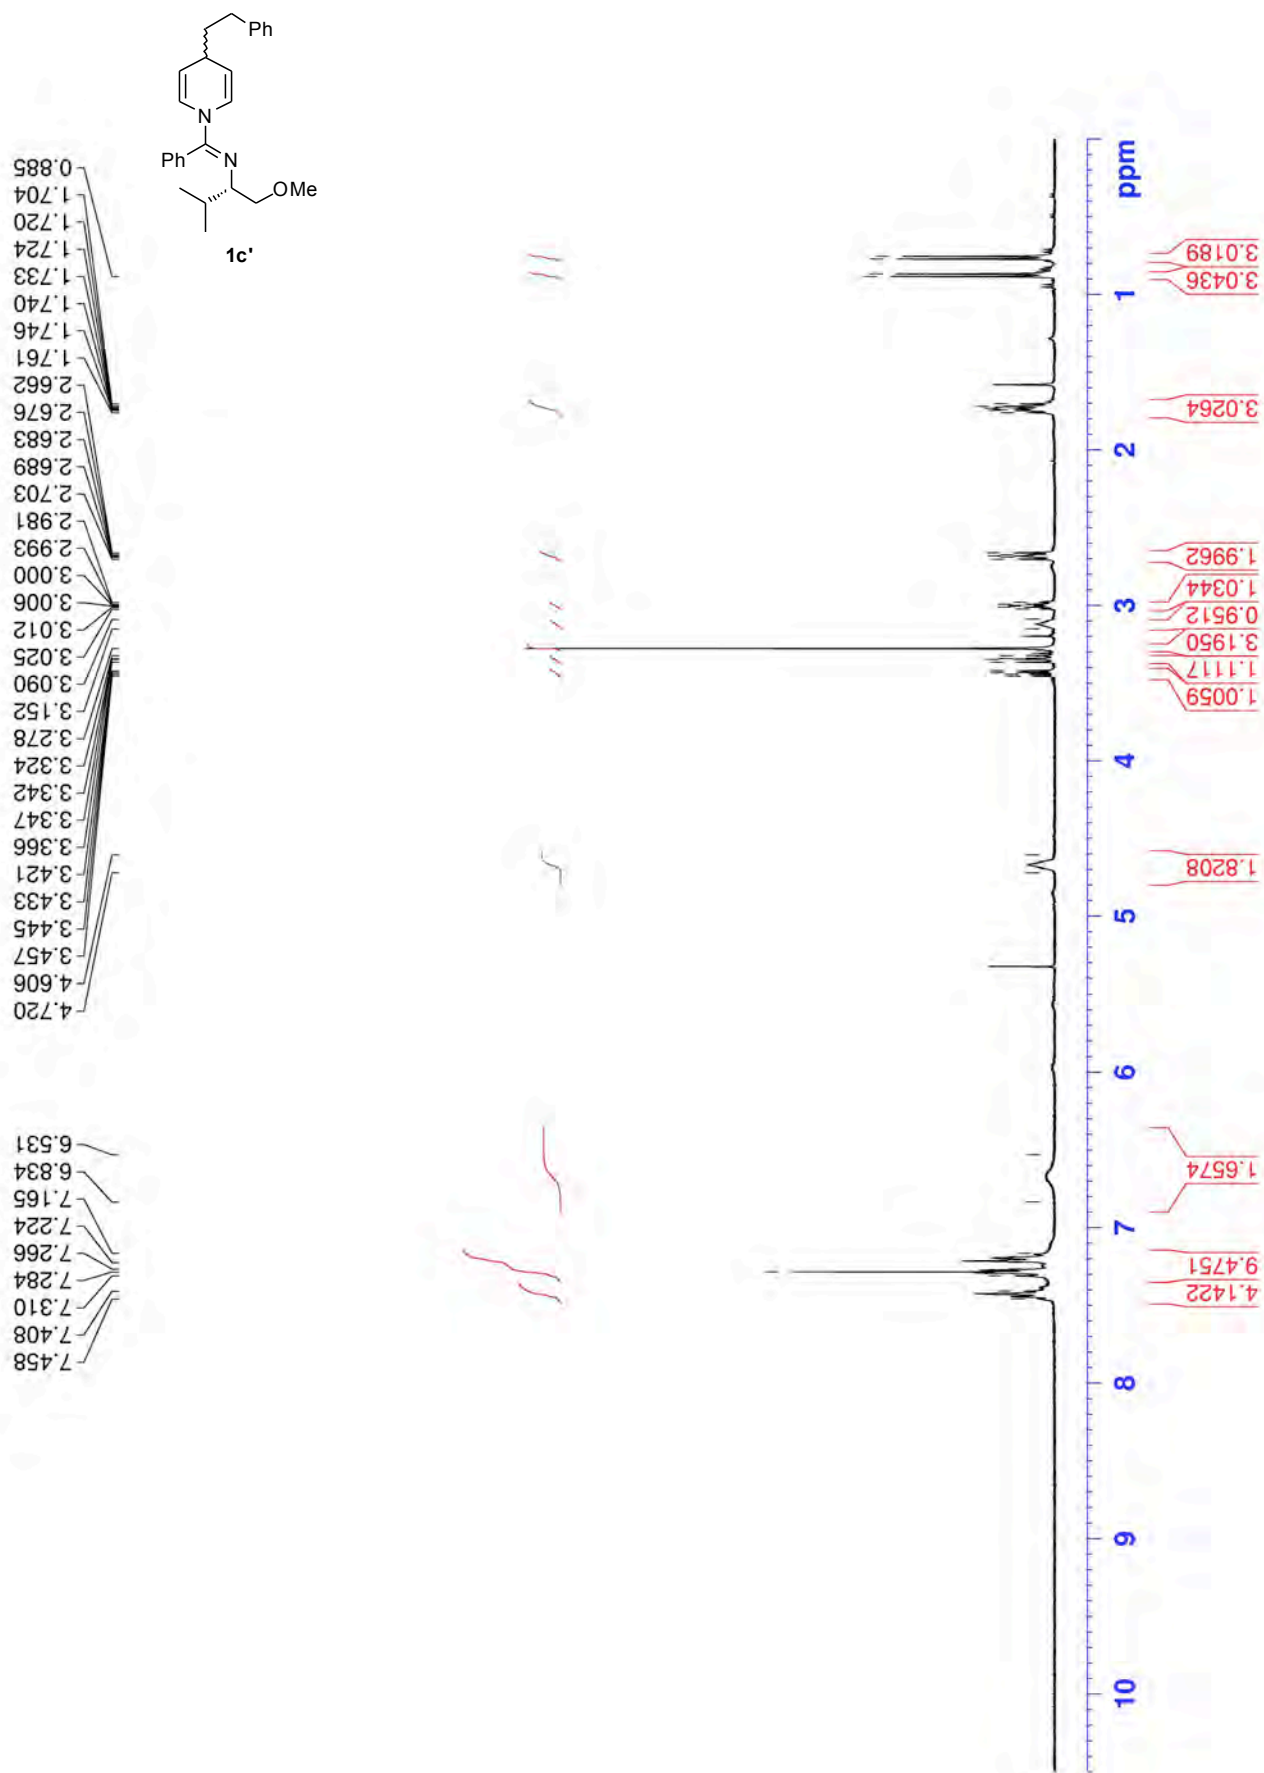

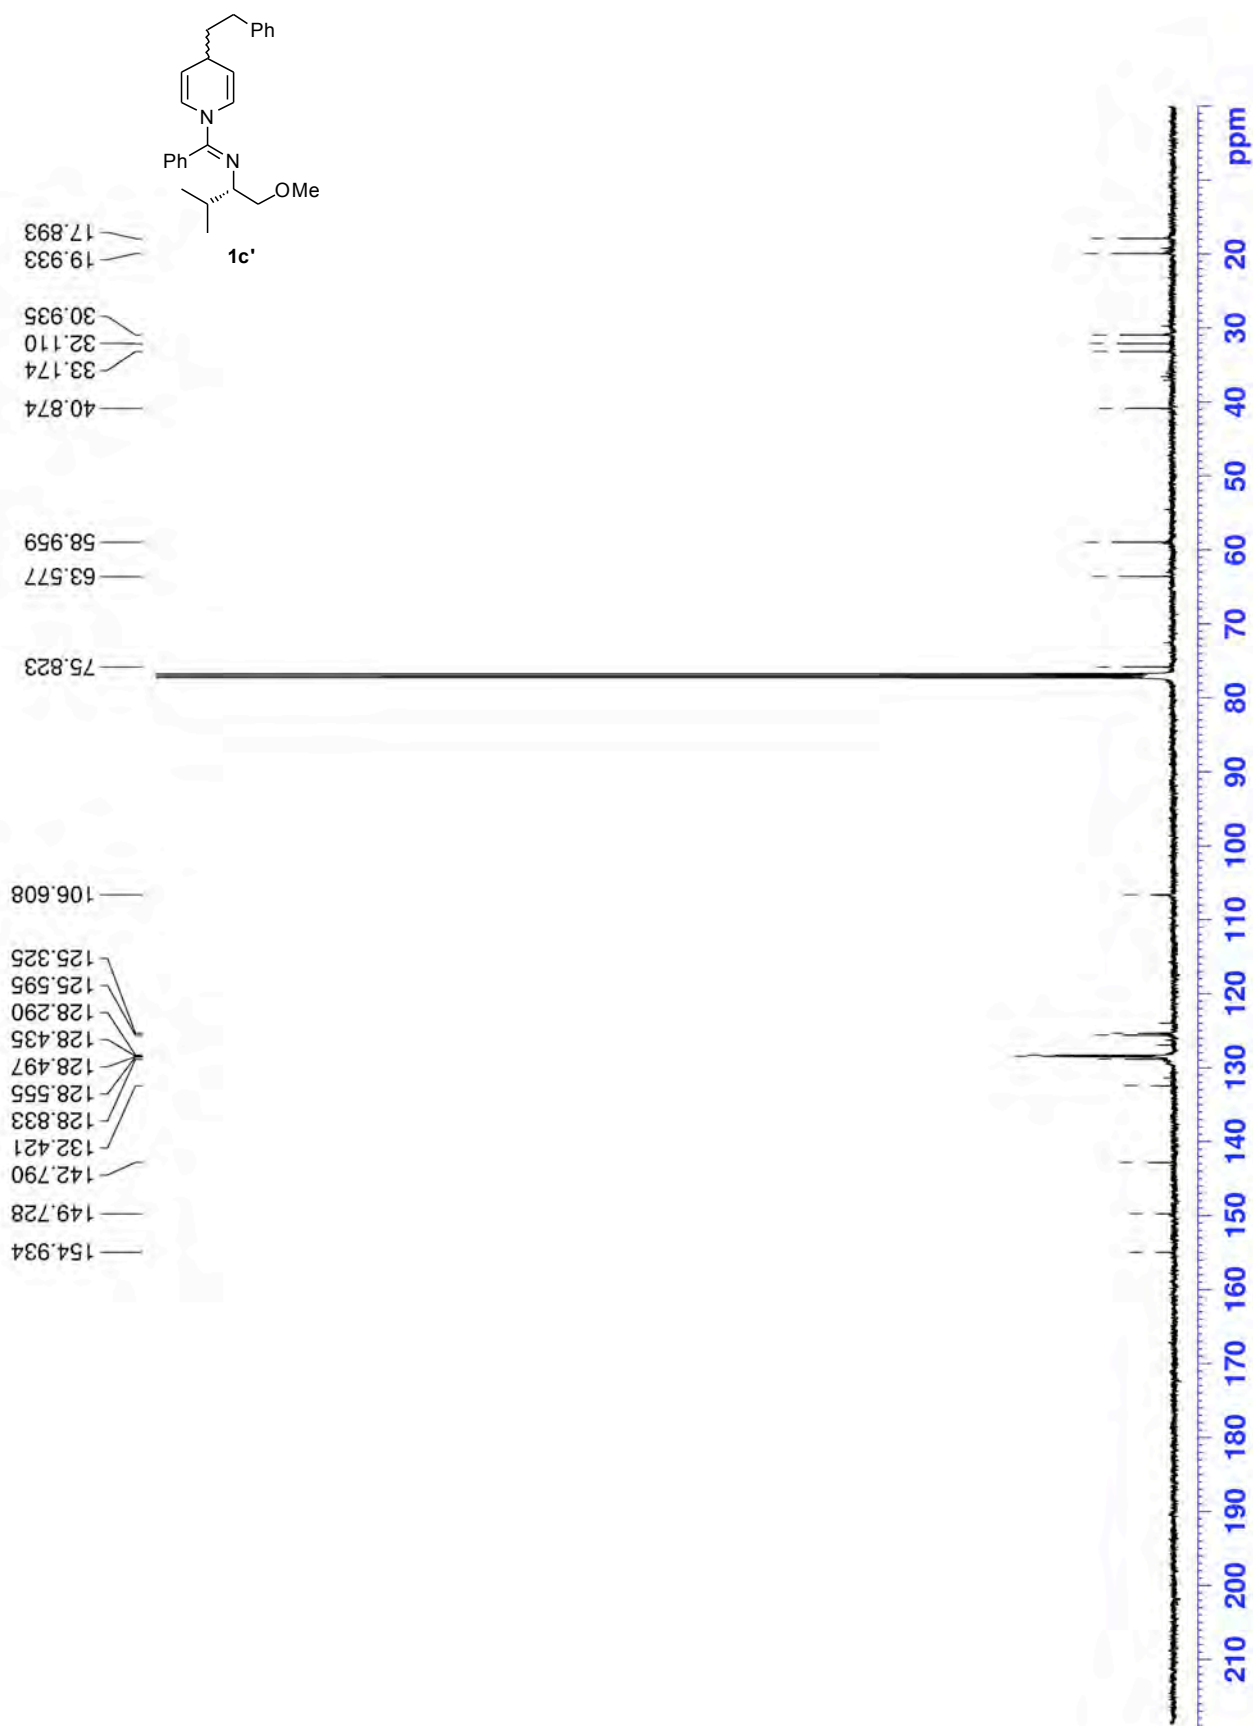

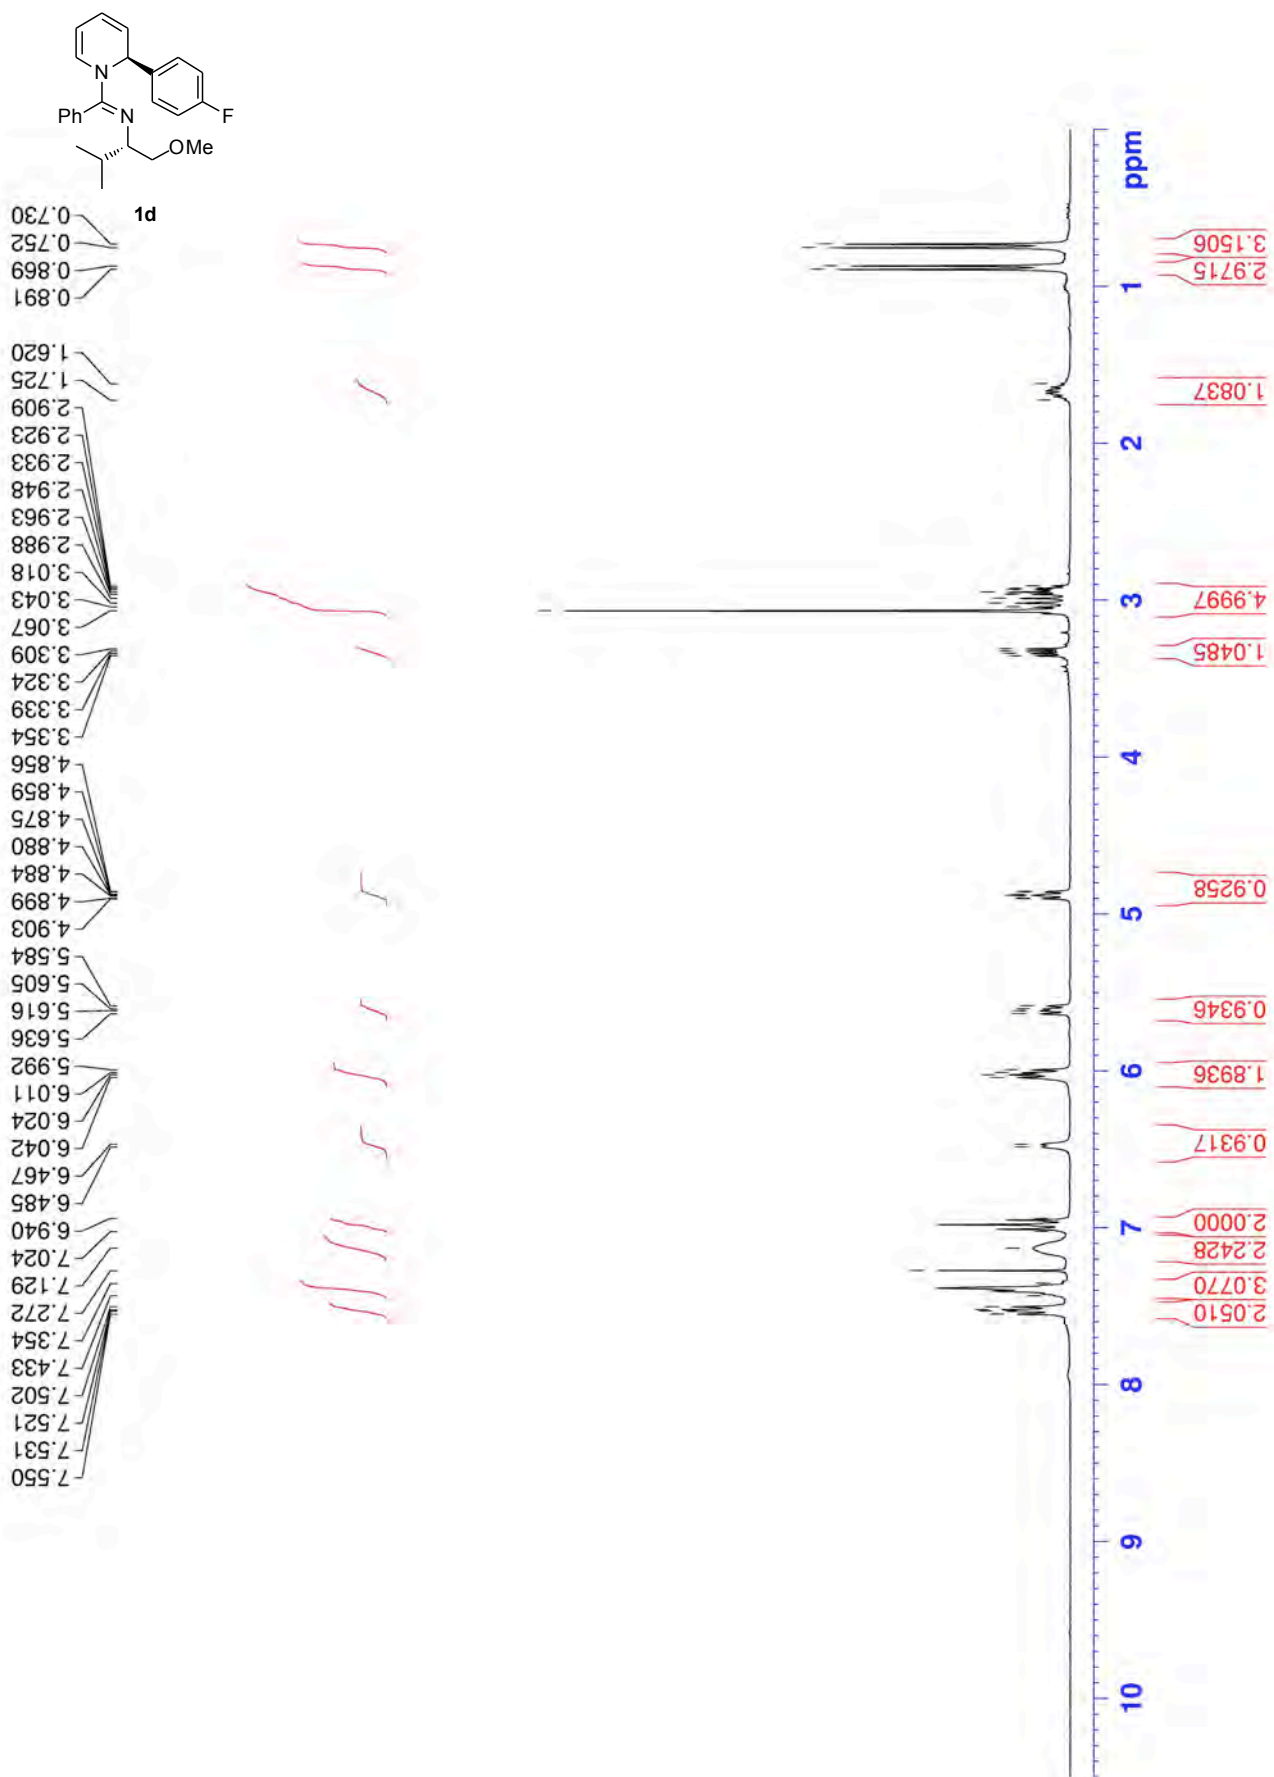

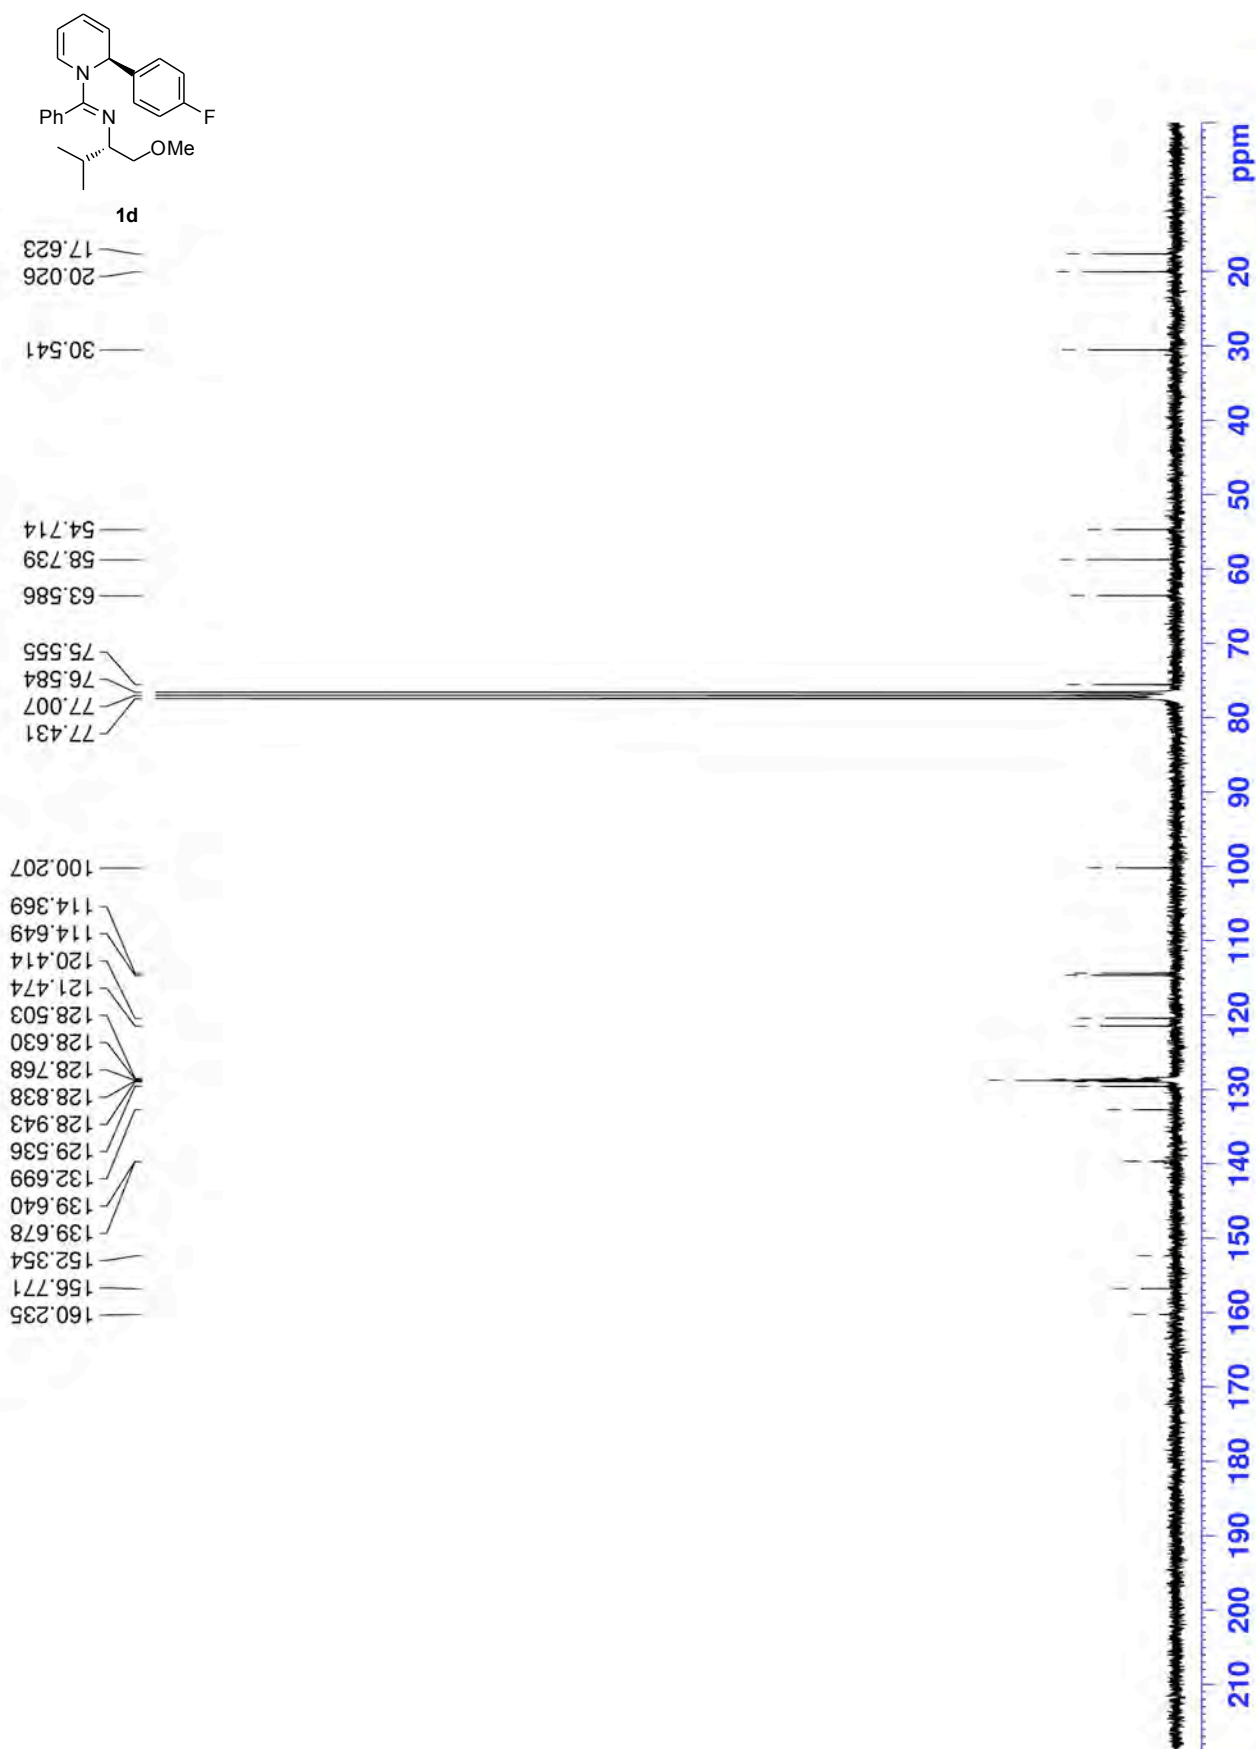

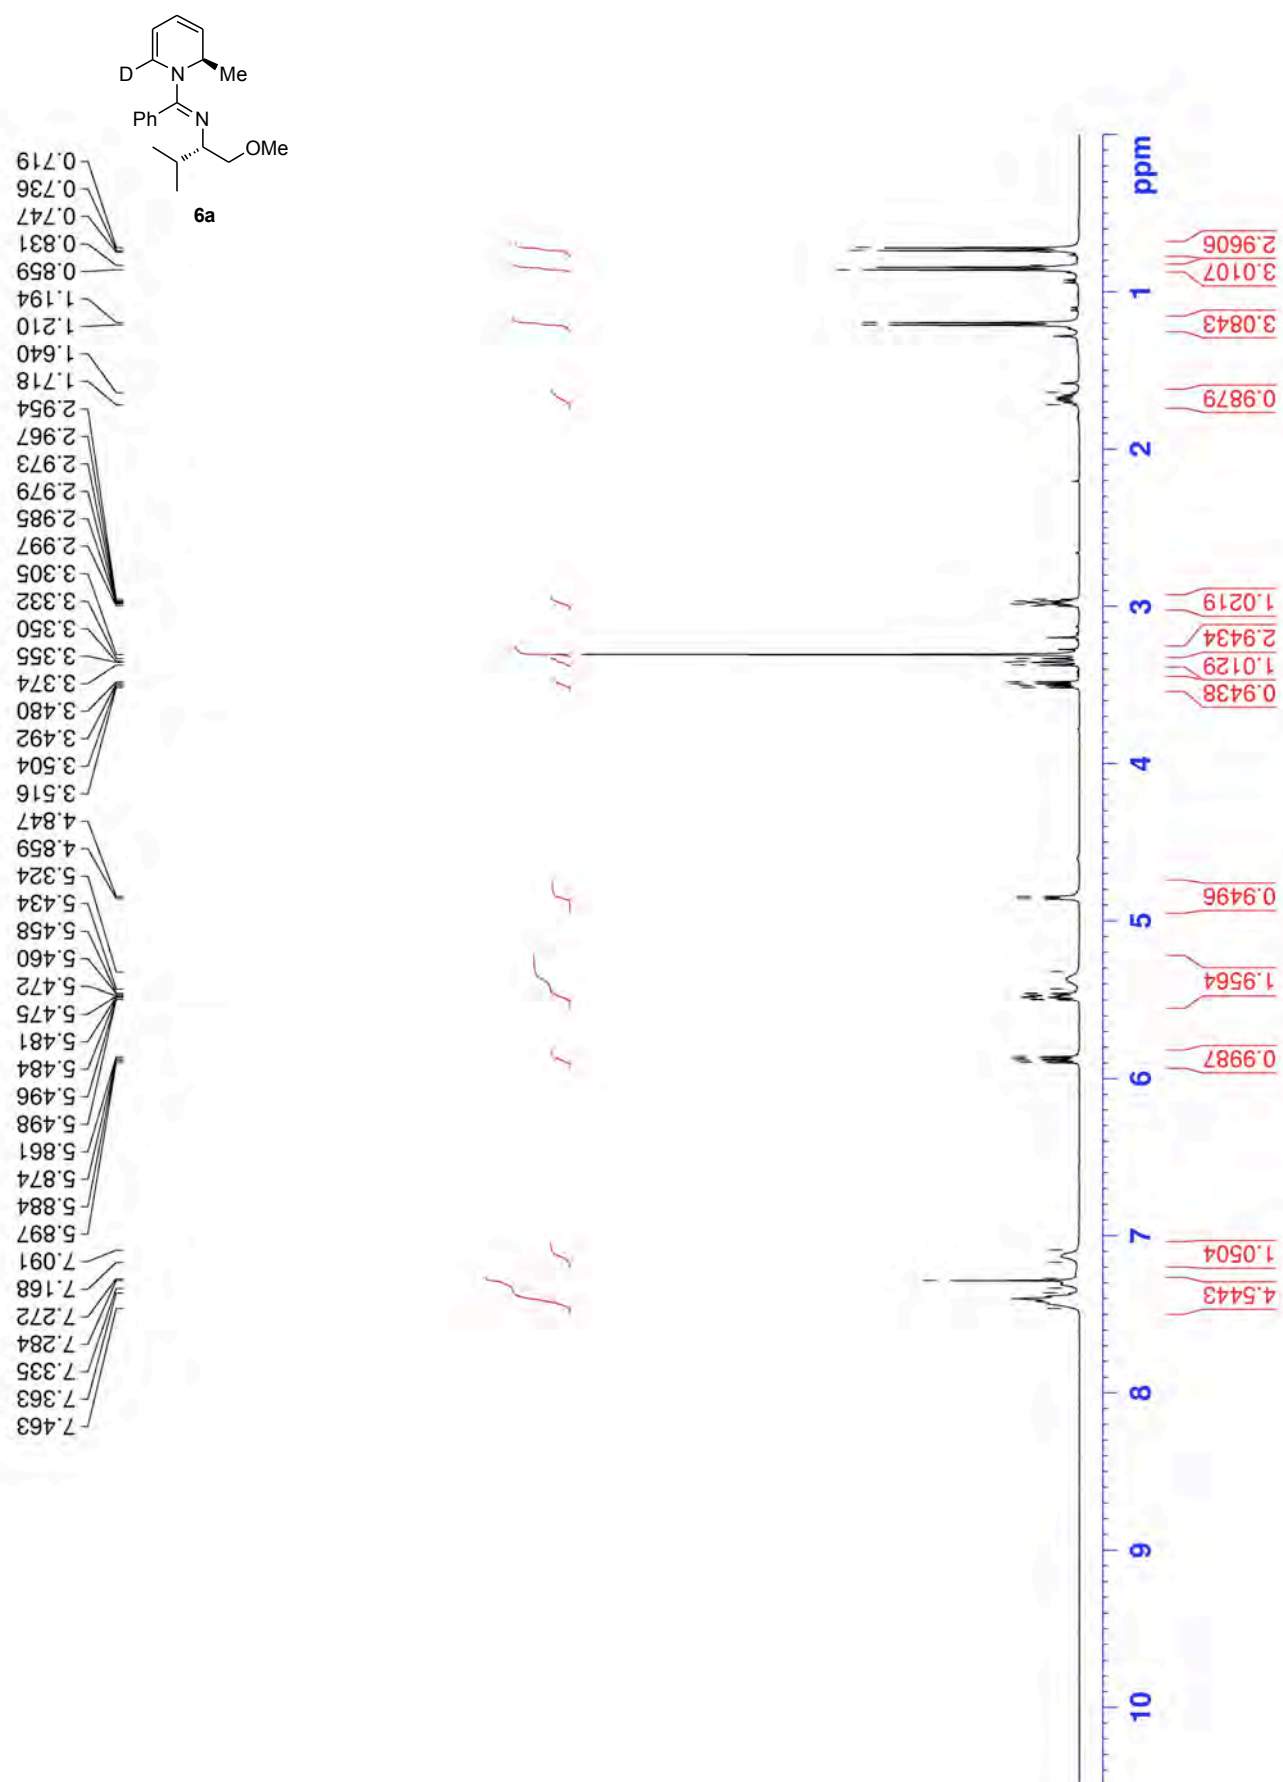



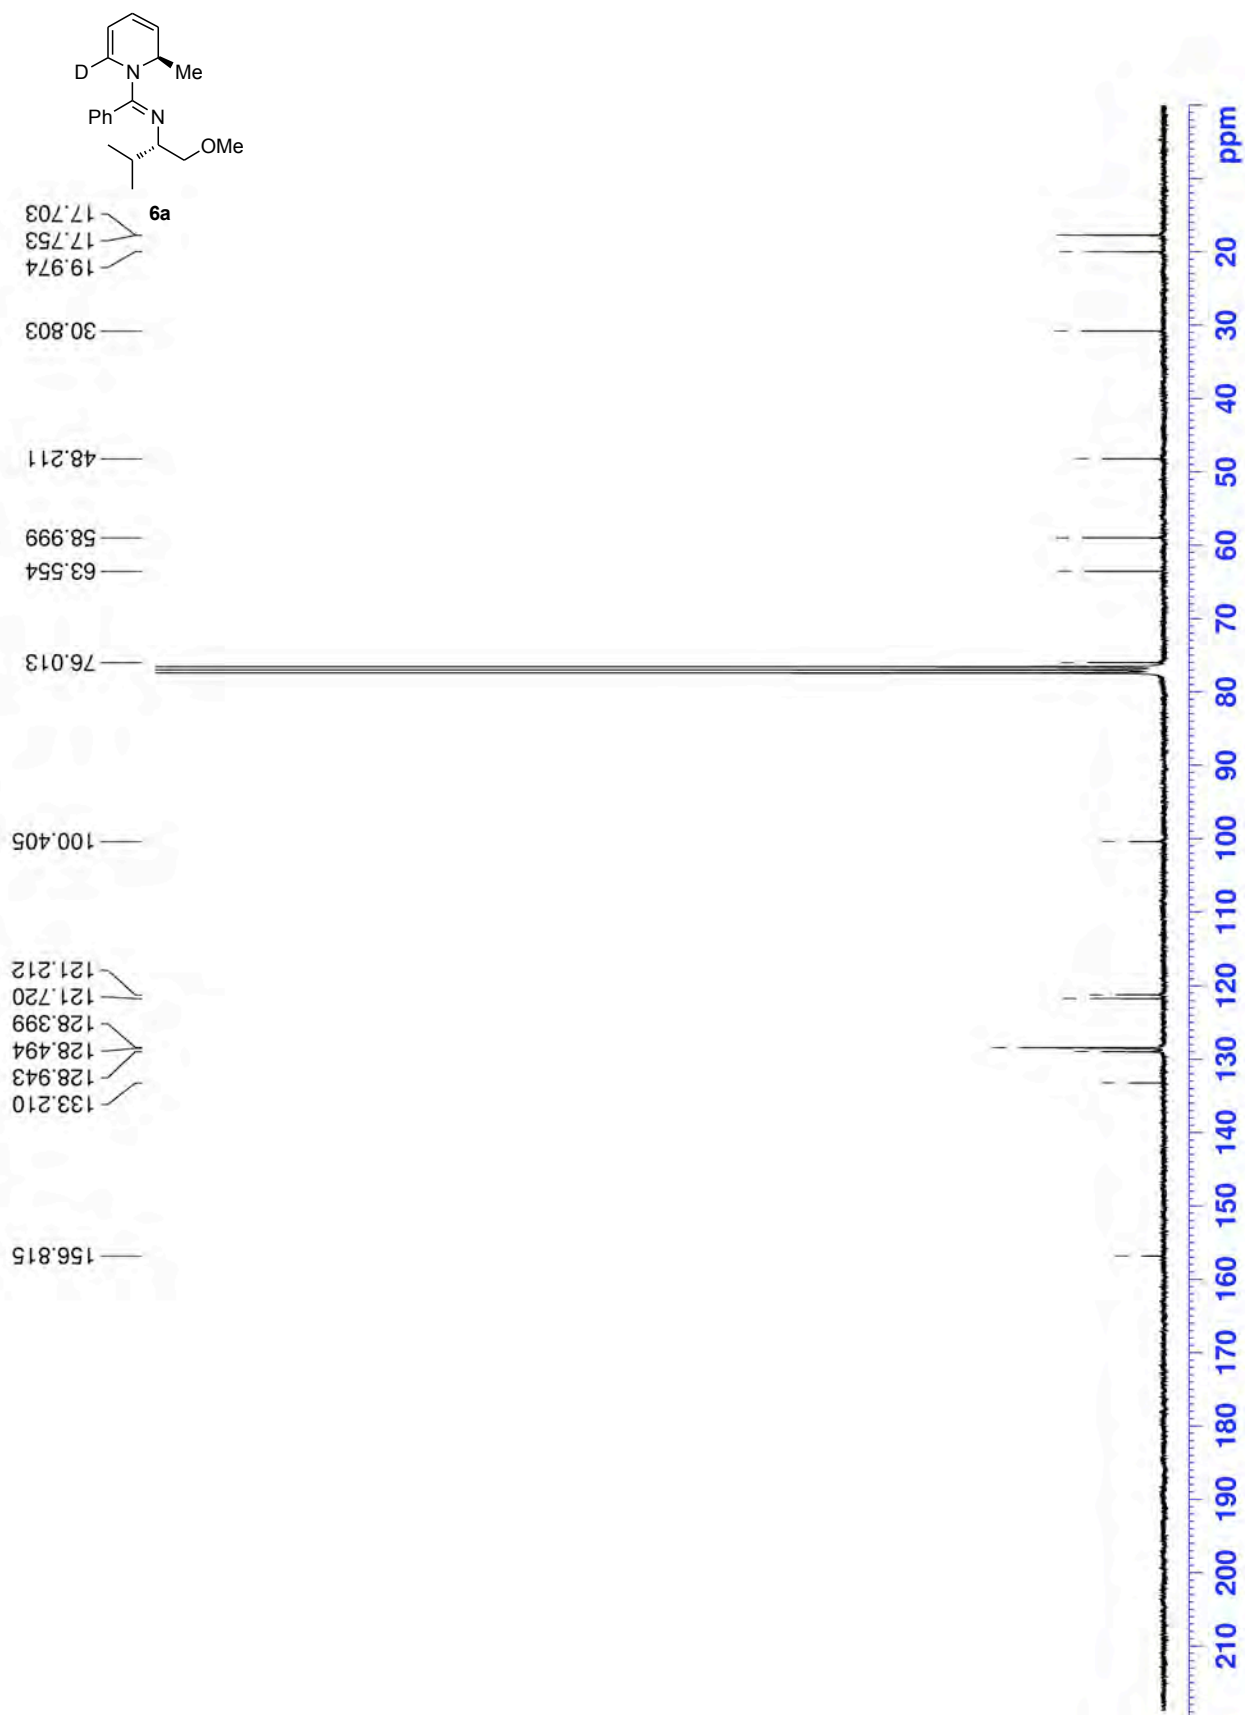

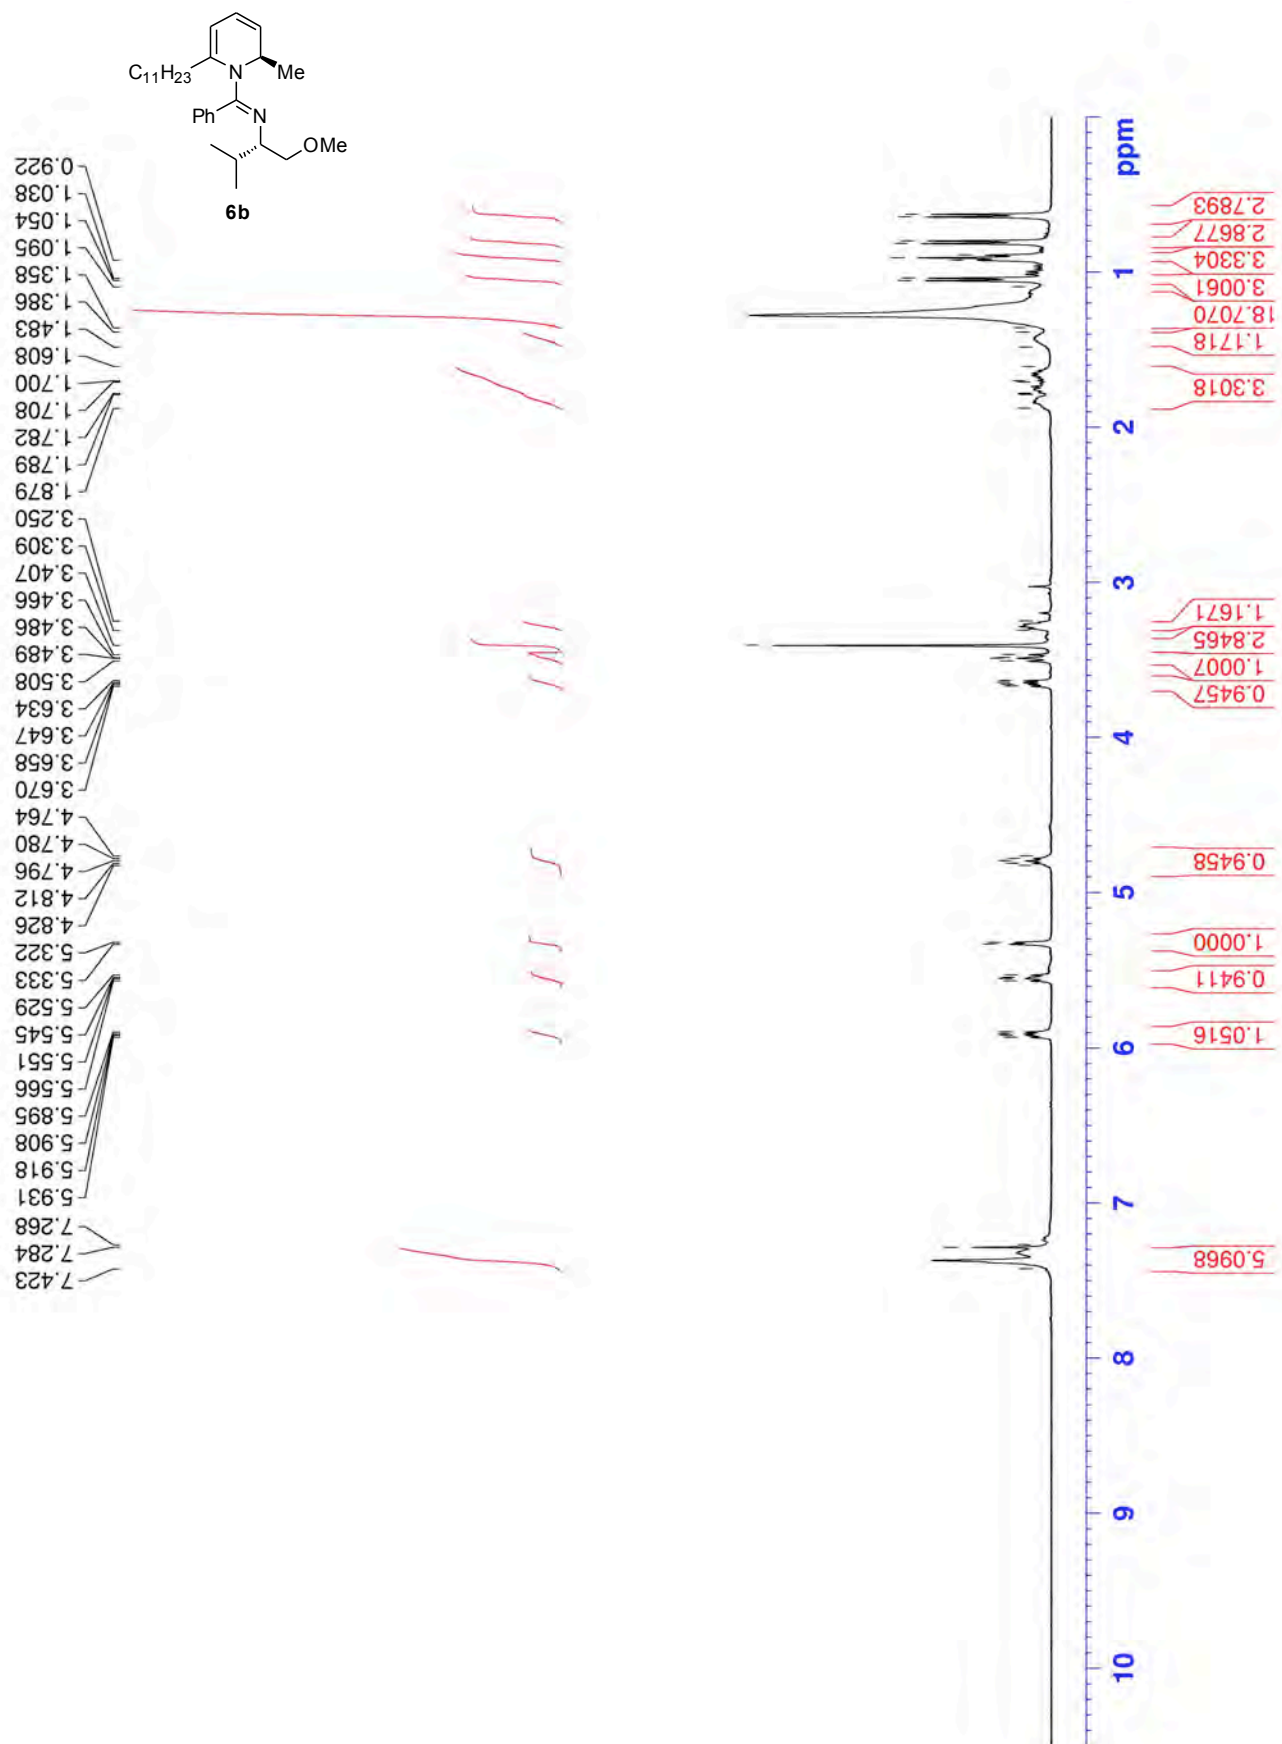

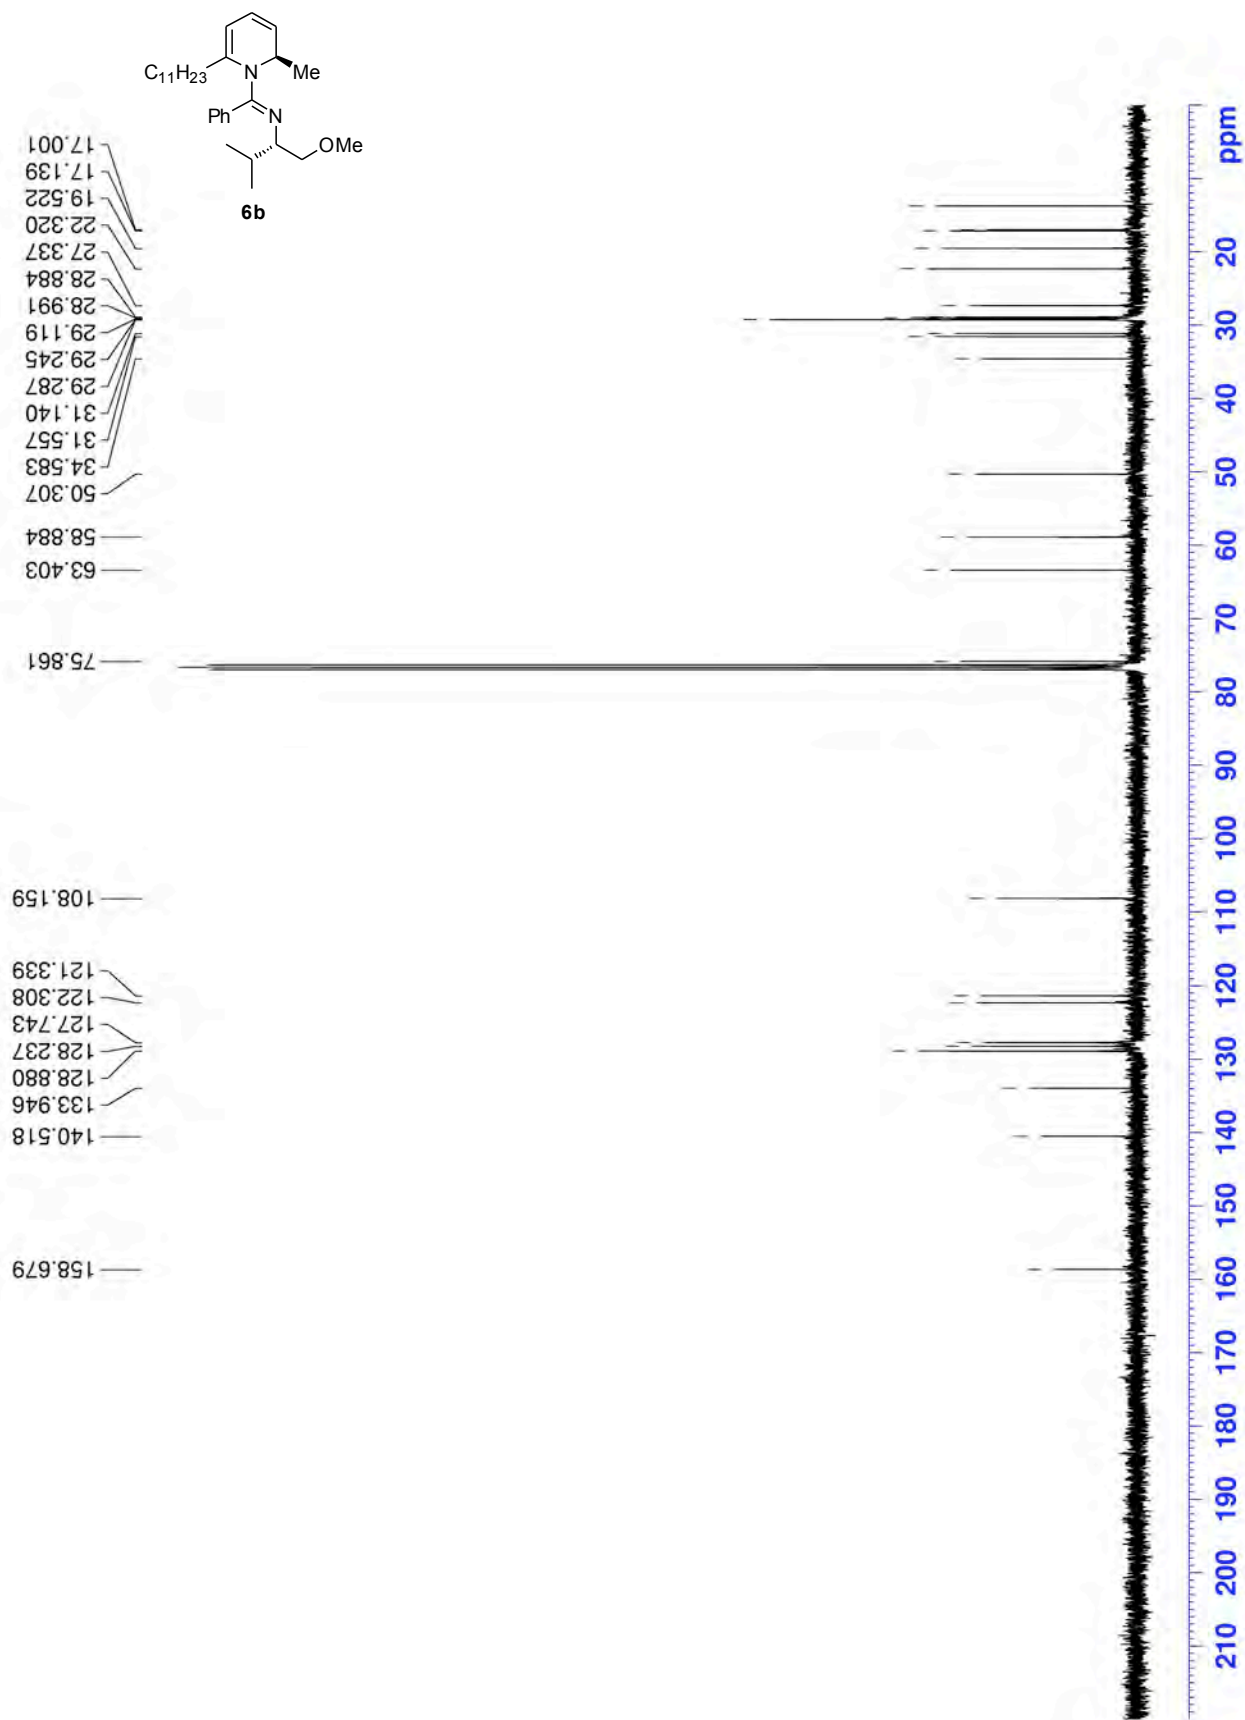

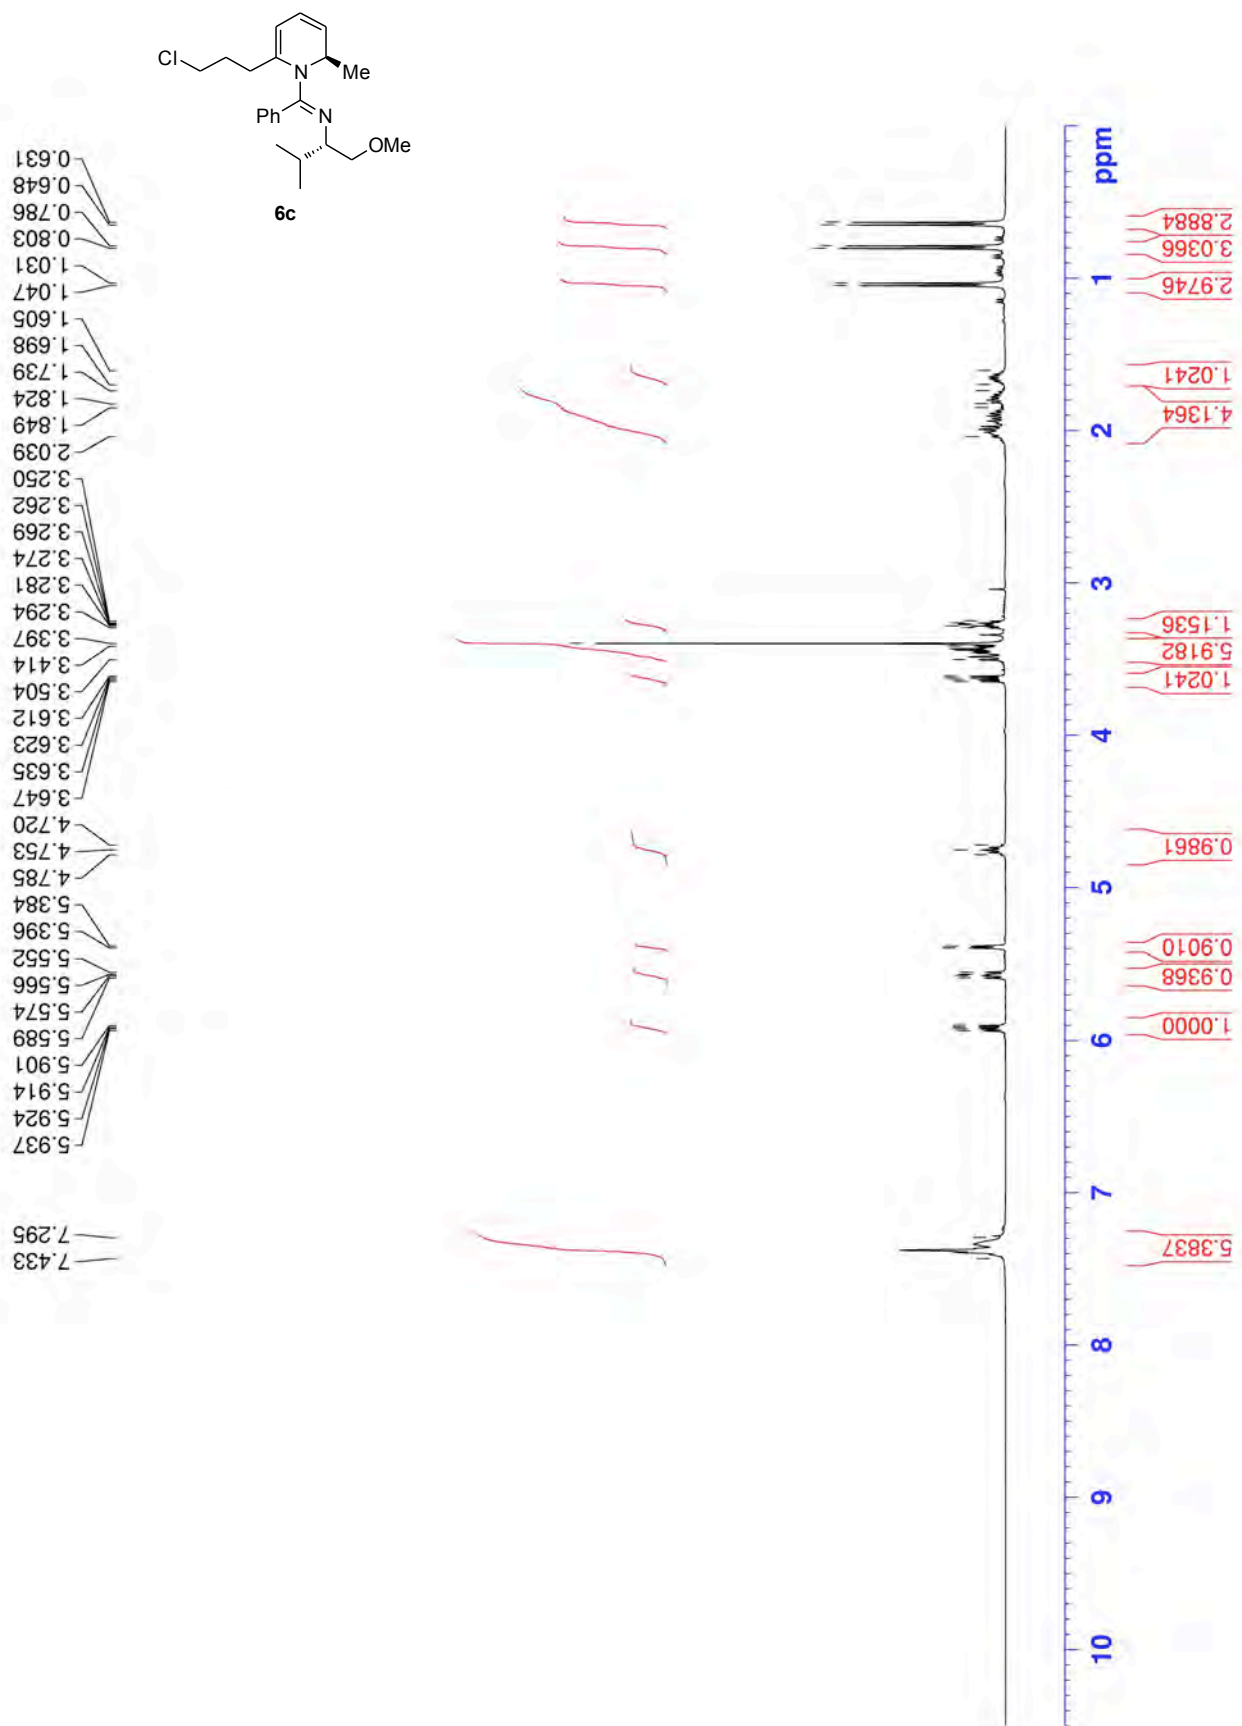

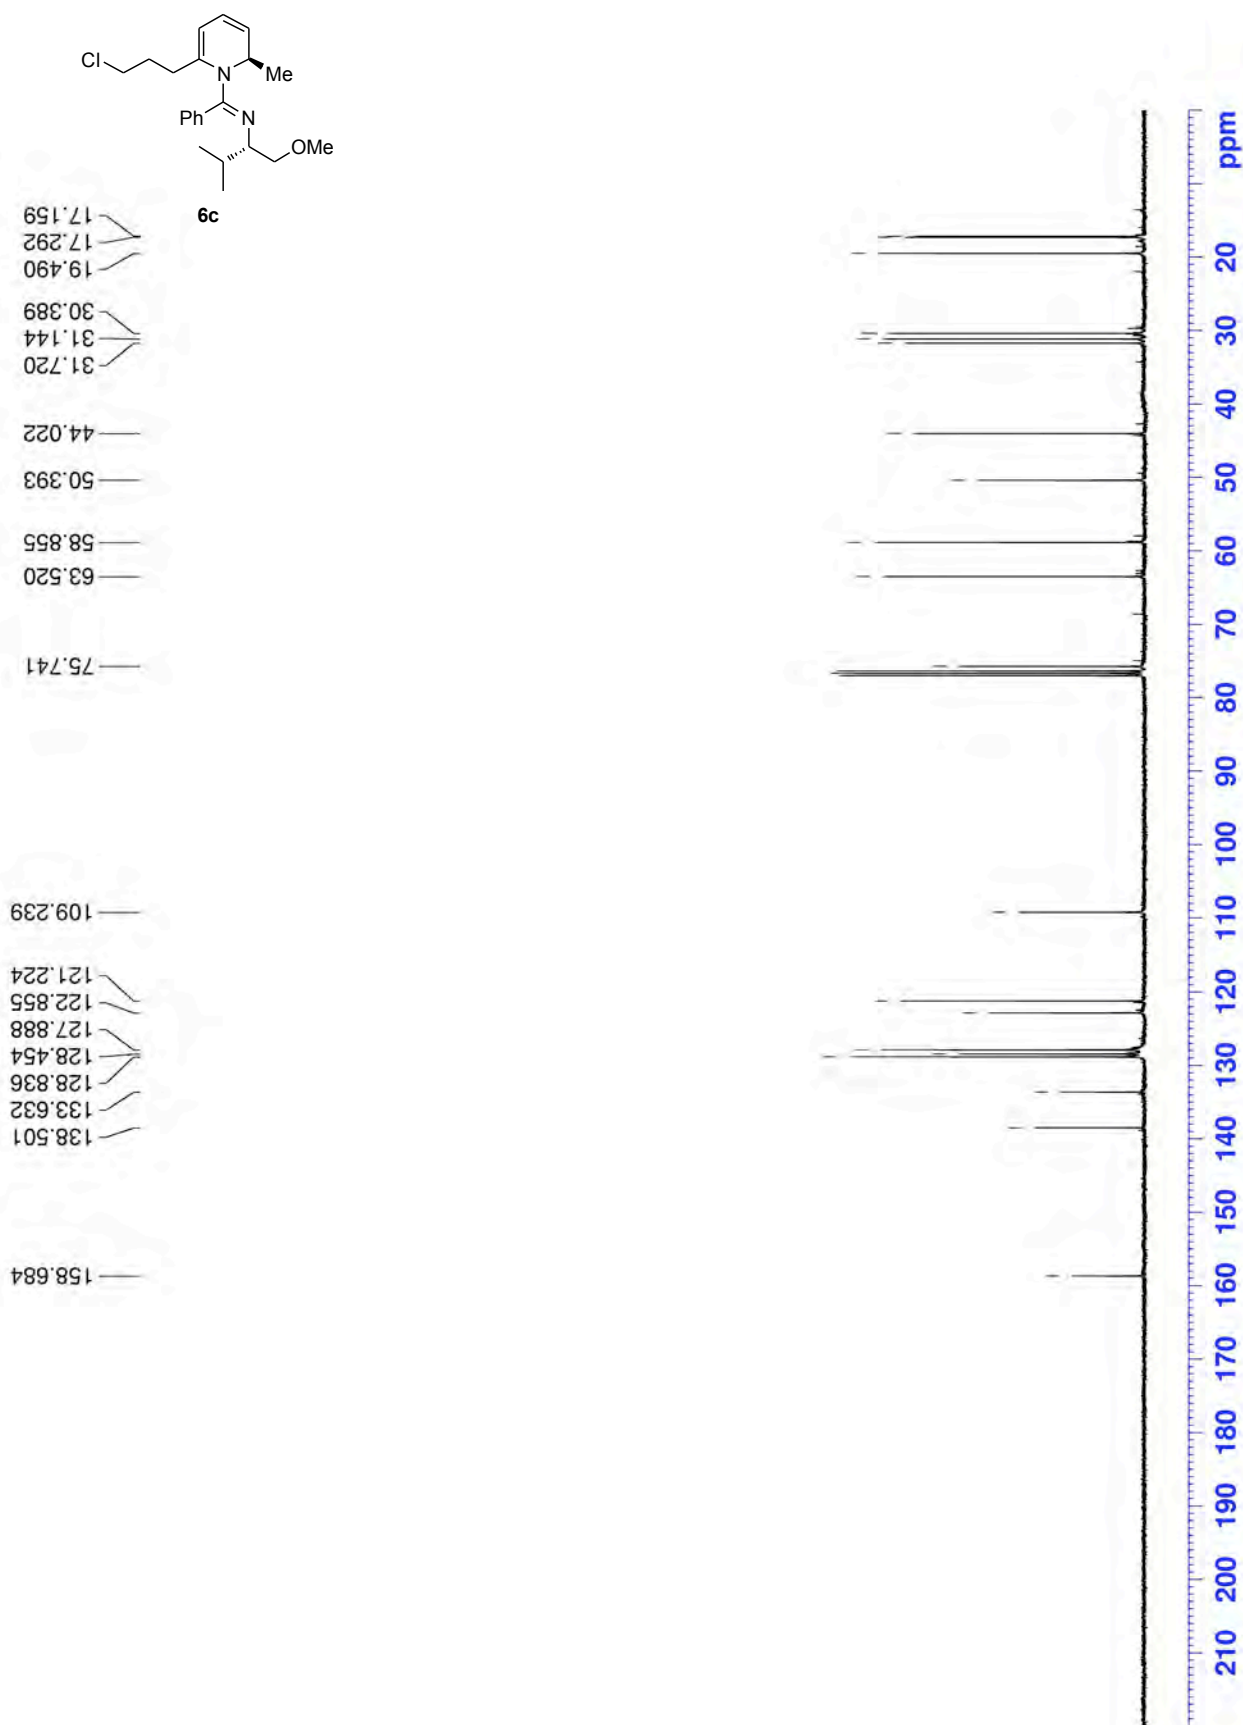

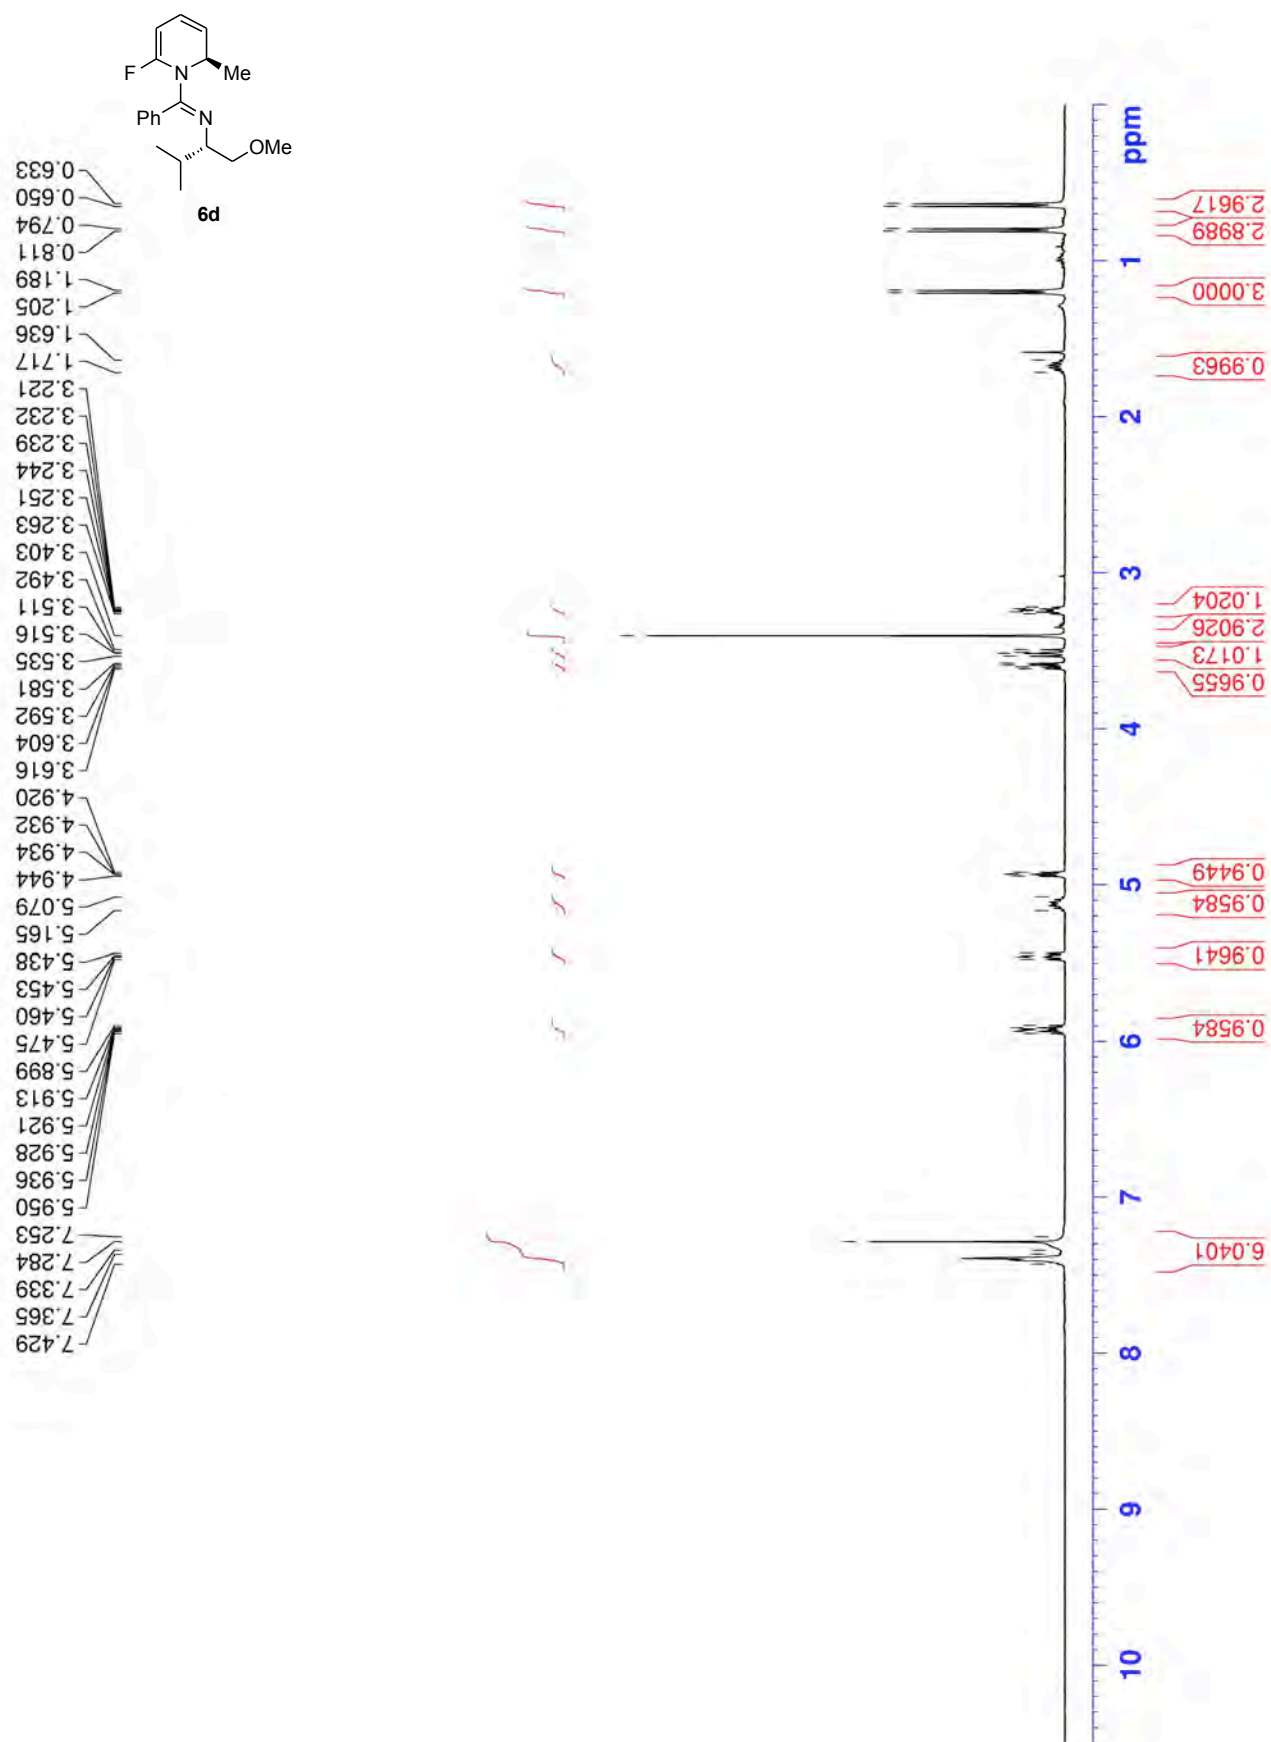

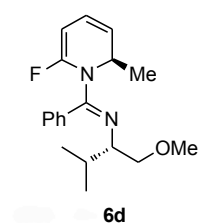

17.179  
17.618  
19.569  
30.896

52.359  
52.374  
58.868  
63.099

75.601  
85.491  
85.242

120.190  
120.232  
120.469  
120.521  
126.919  
127.747  
128.457  
132.767  
132.798

149.860  
152.529  
155.811  
155.837

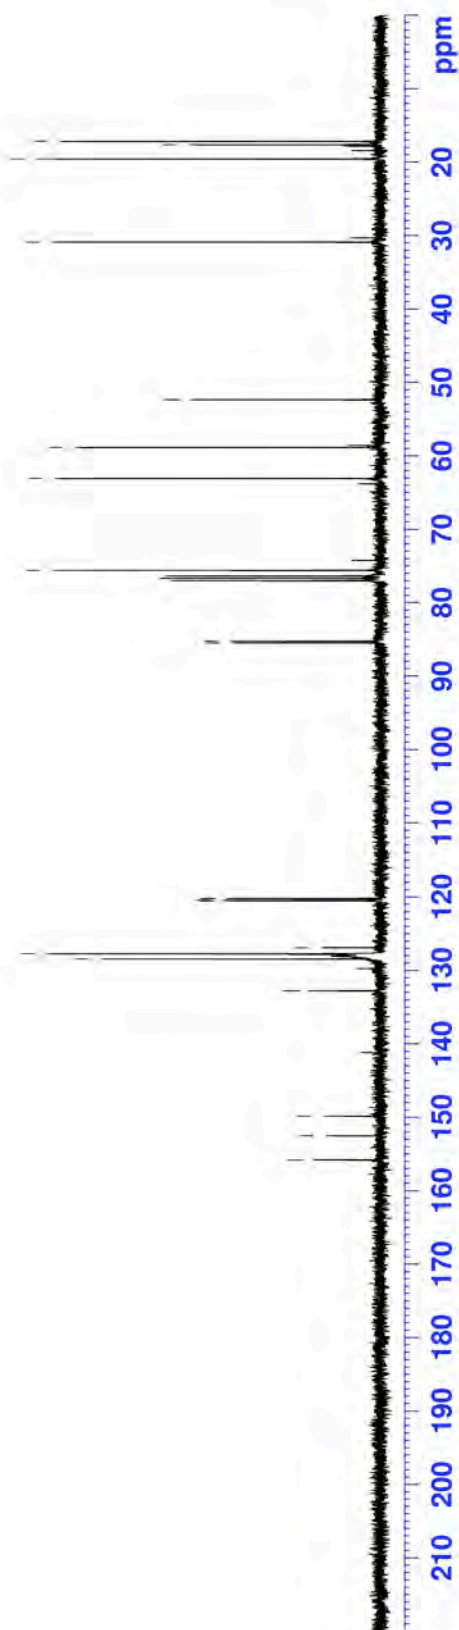

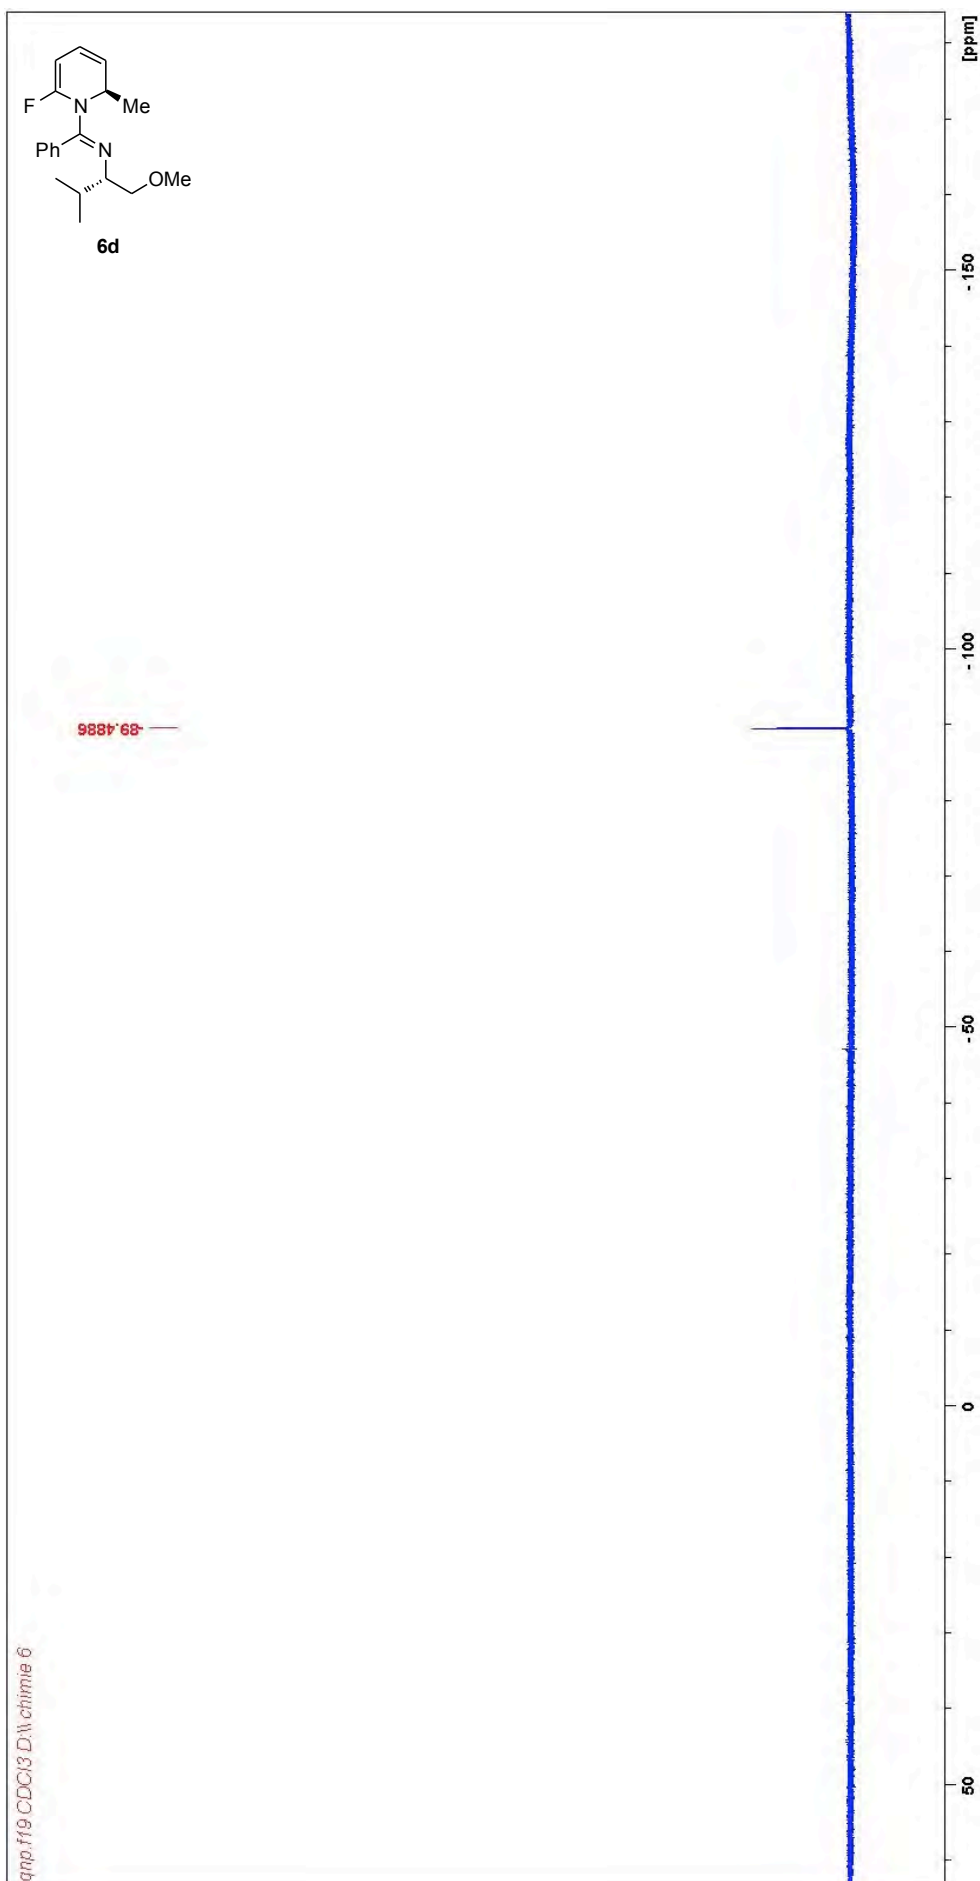



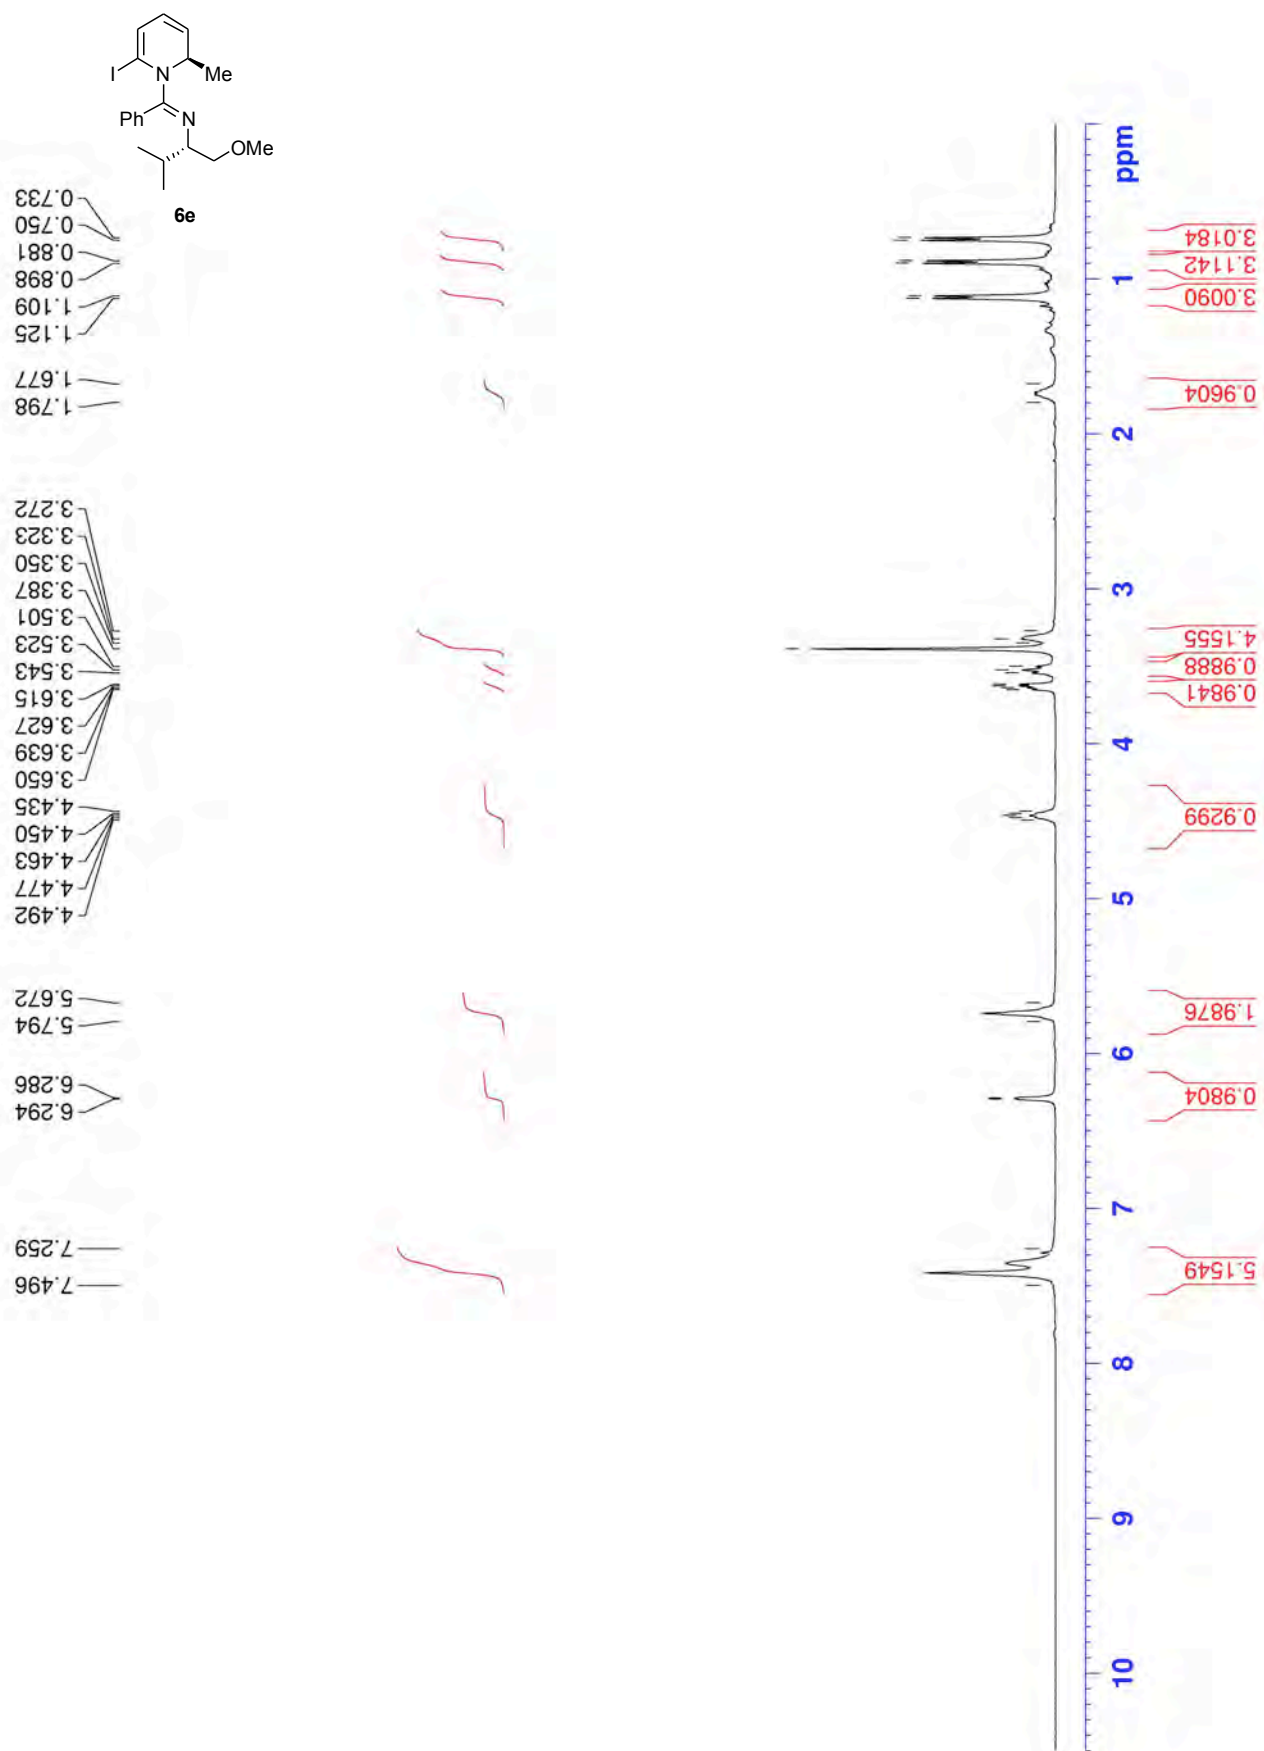

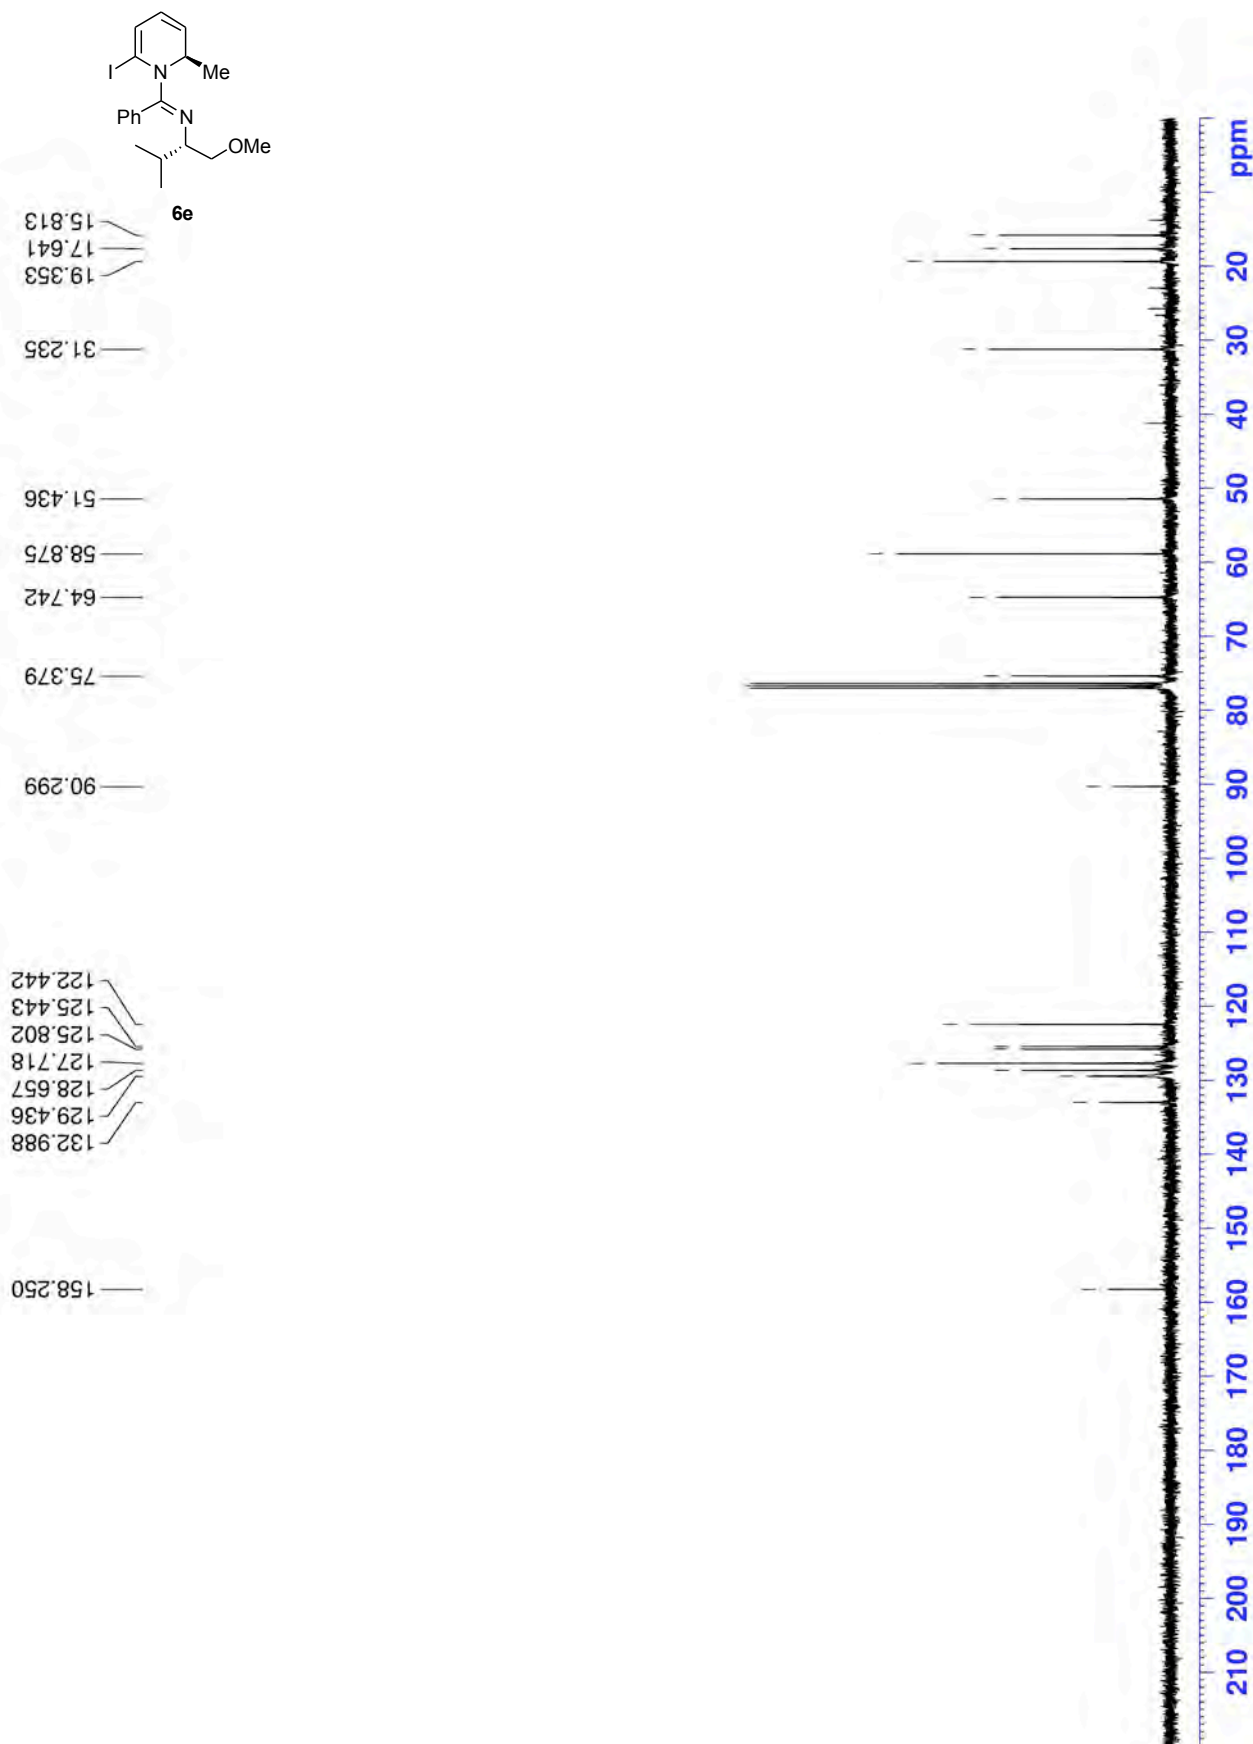

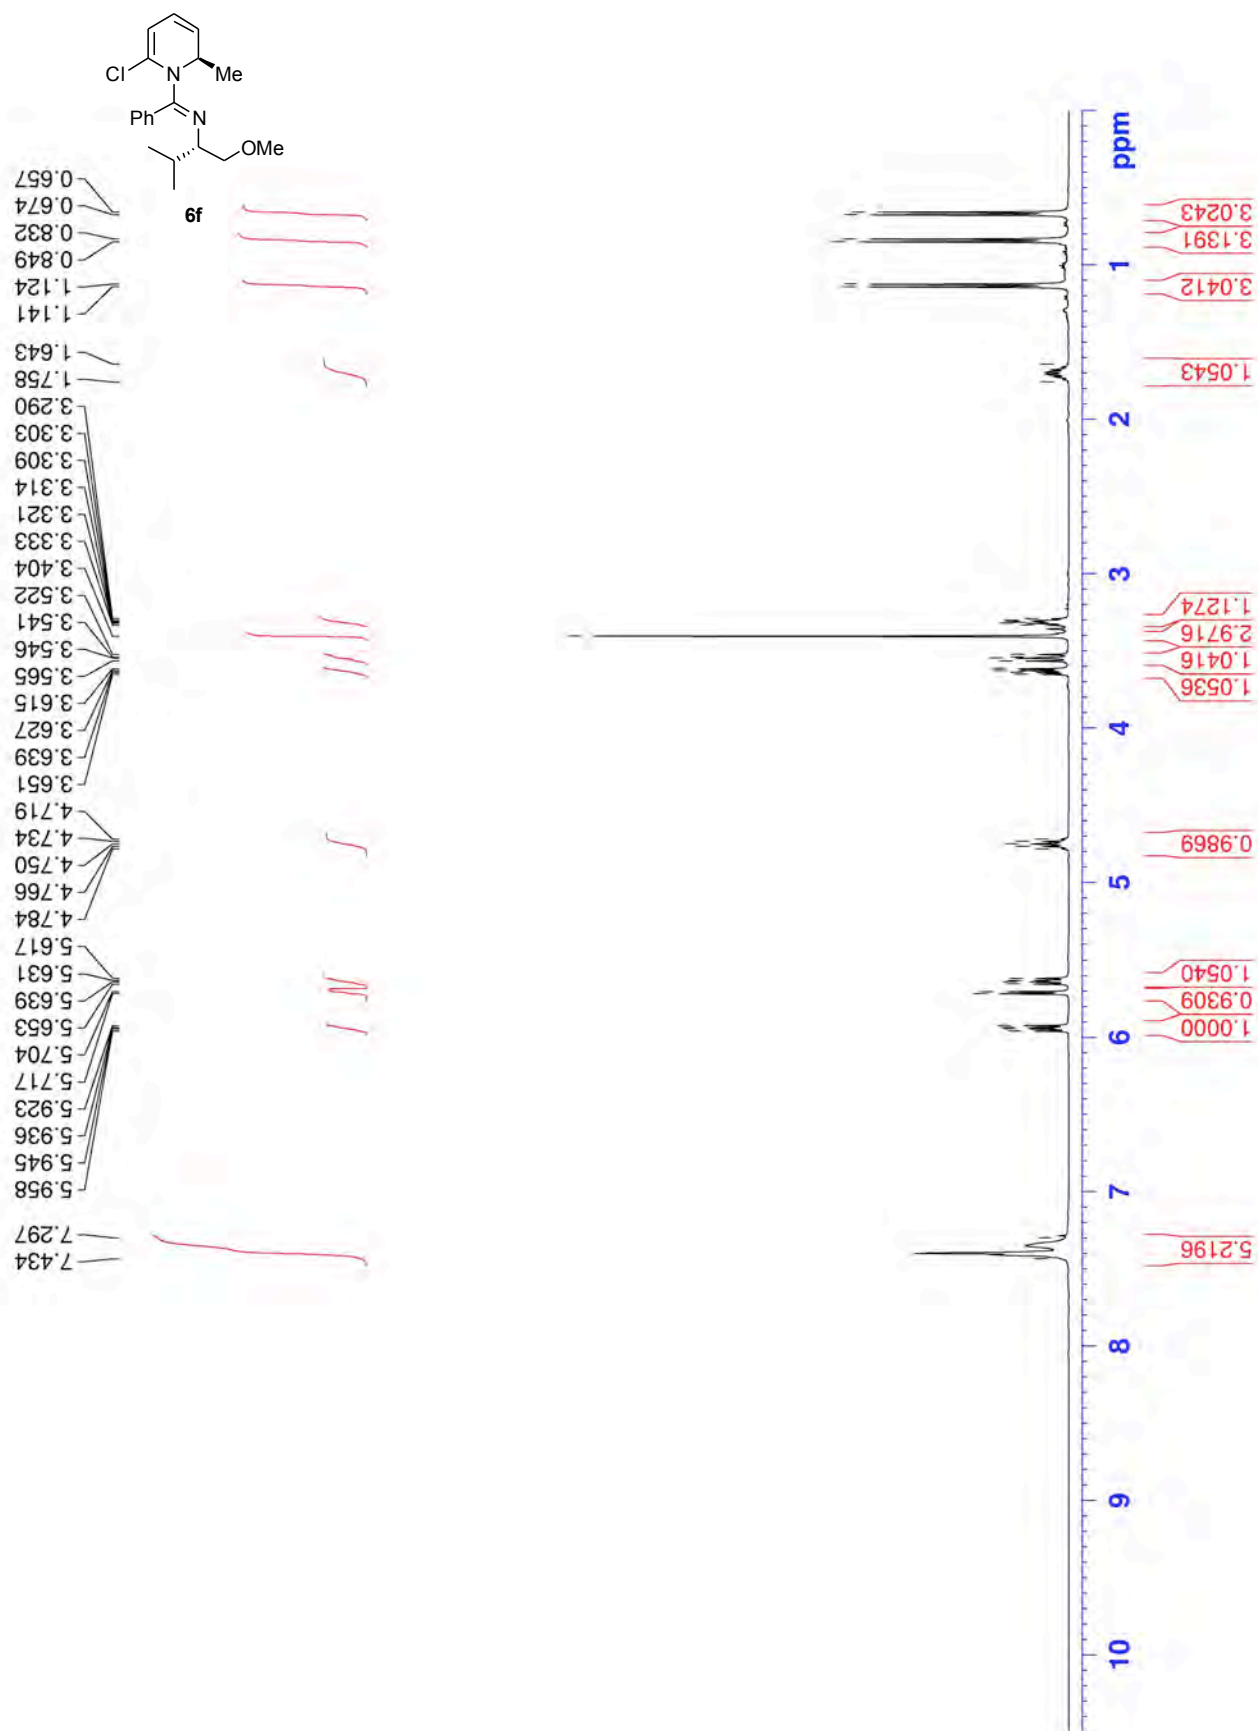

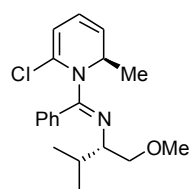

**6f**

19.880  
17.482  
17.455

31.566

52.450

59.245

64.293

75.966

111.207

121.784

124.274

128.065

128.908

129.386

129.720

133.194

158.030

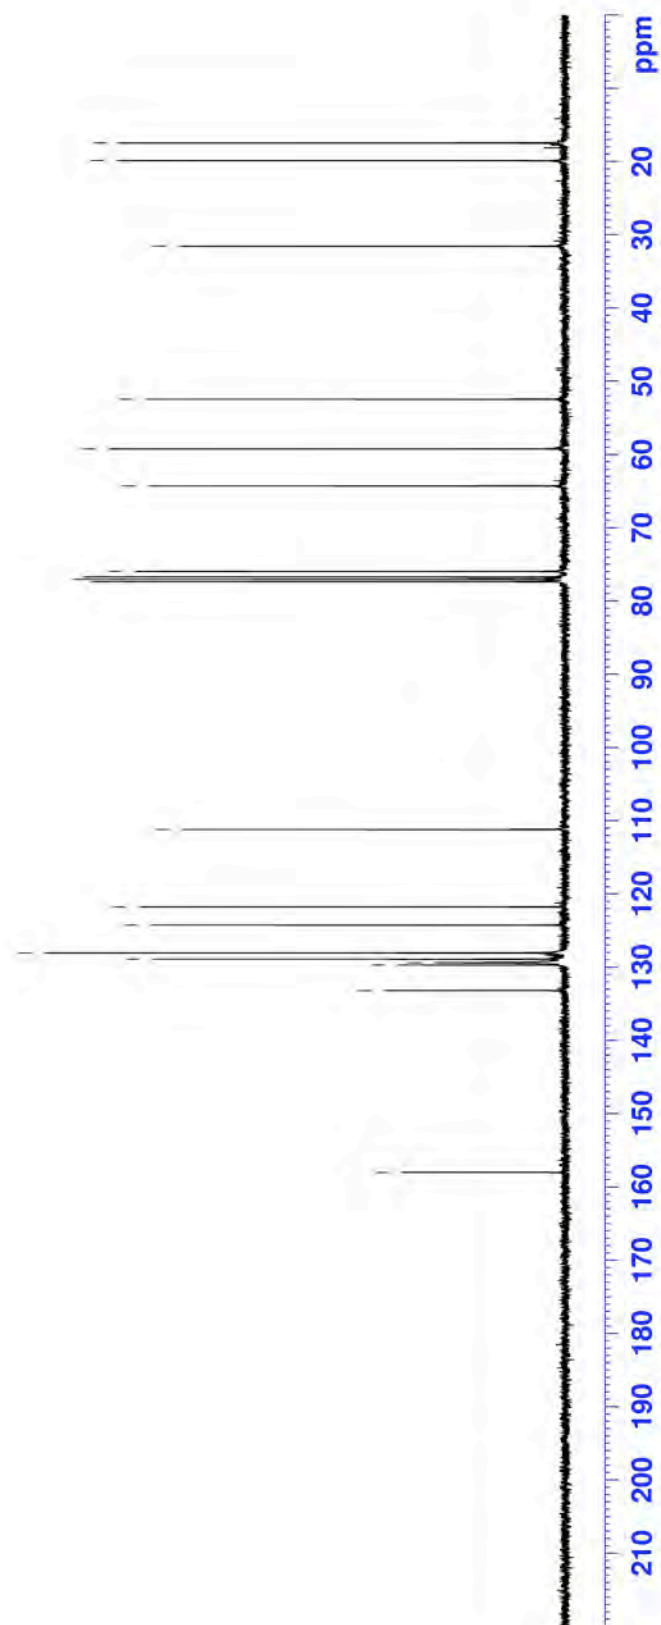

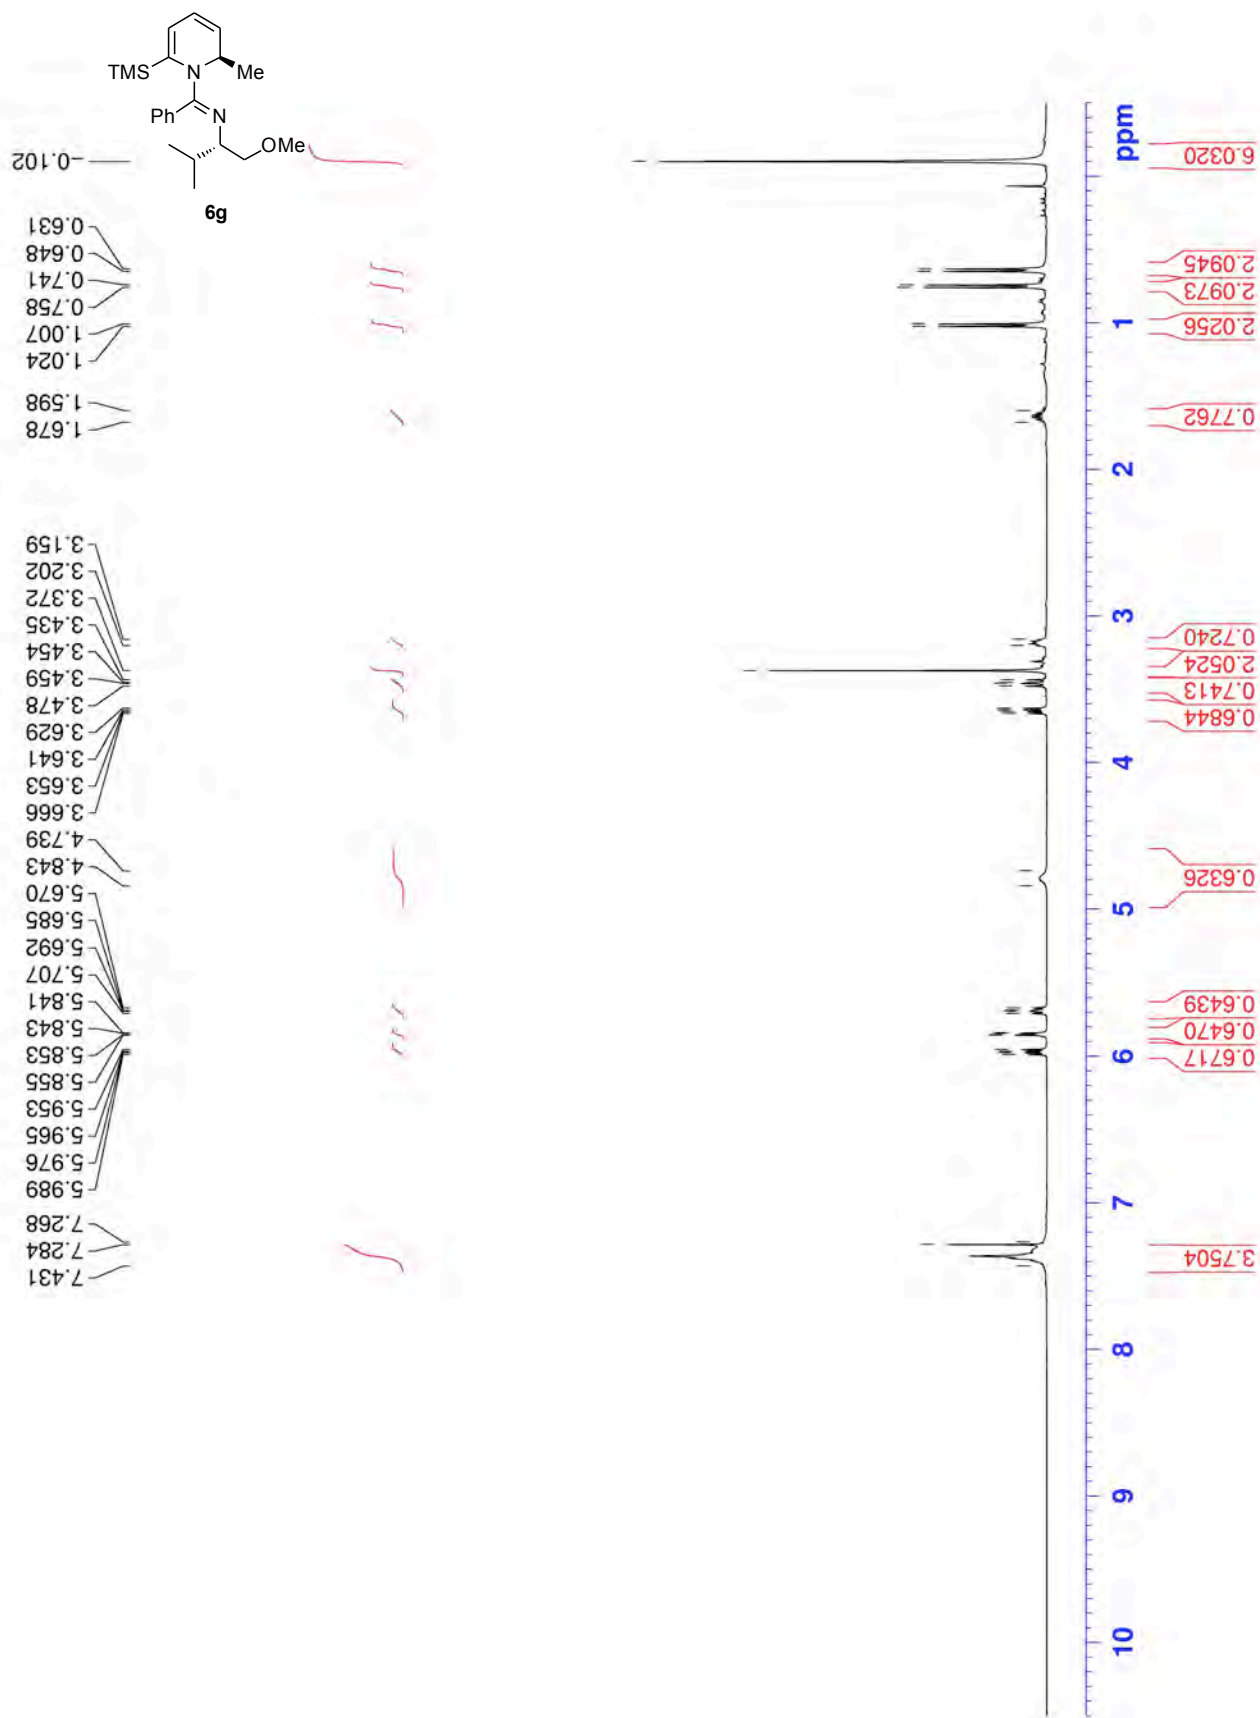

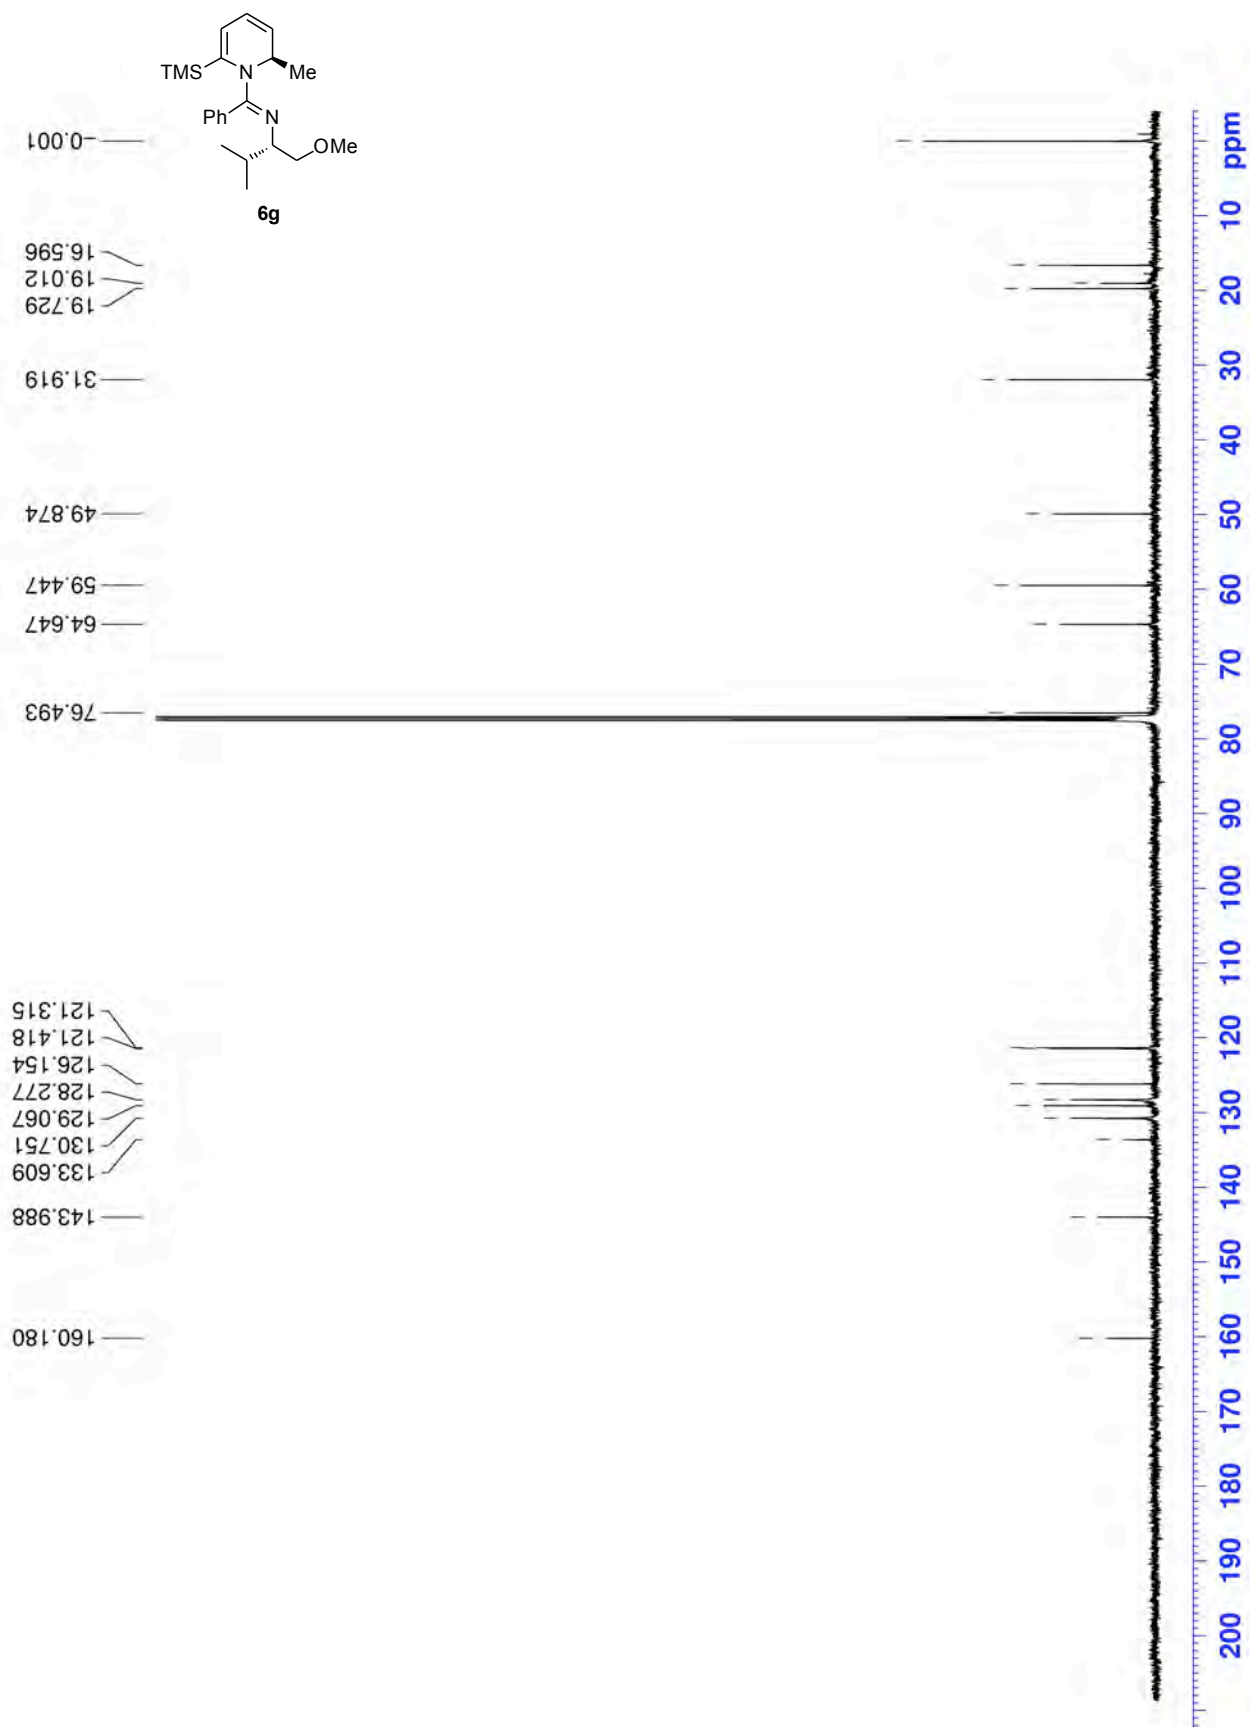

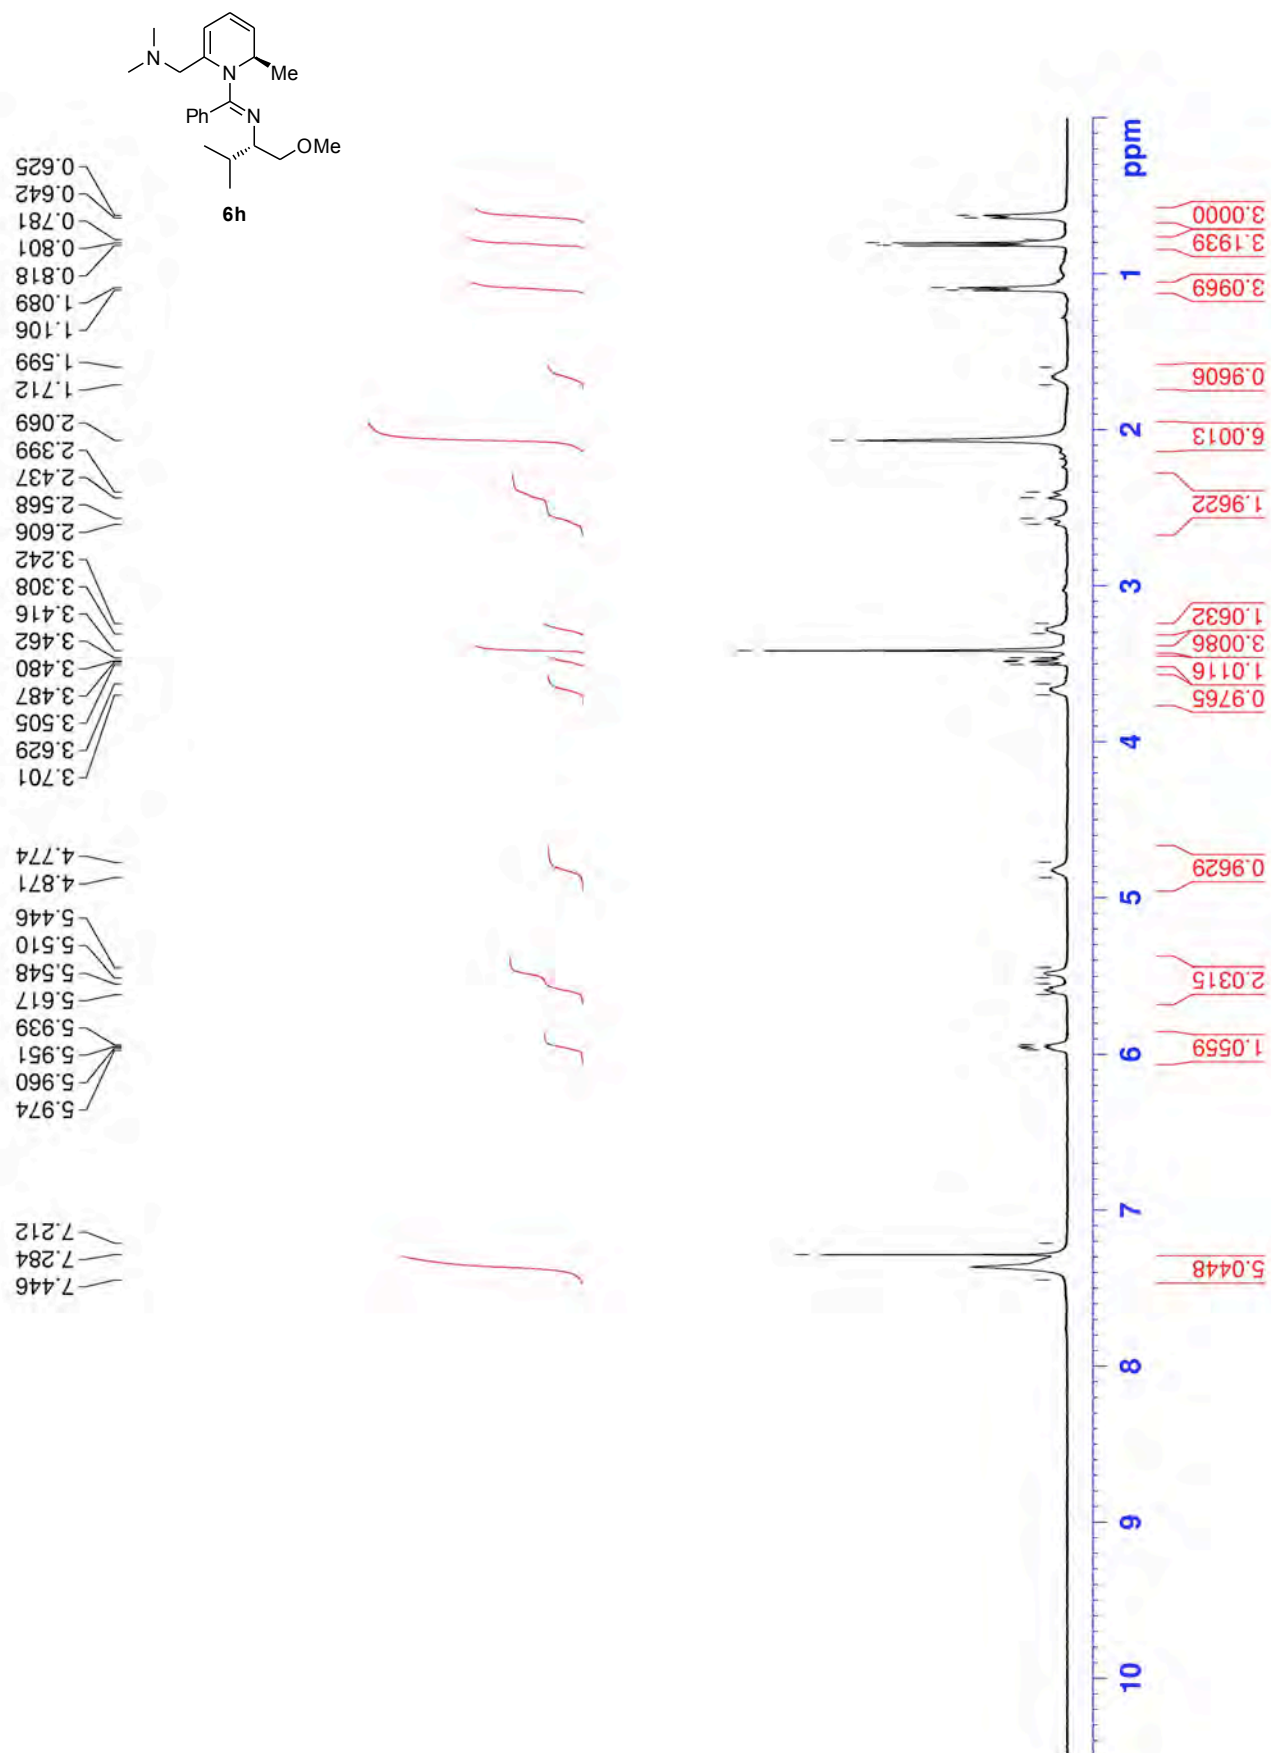

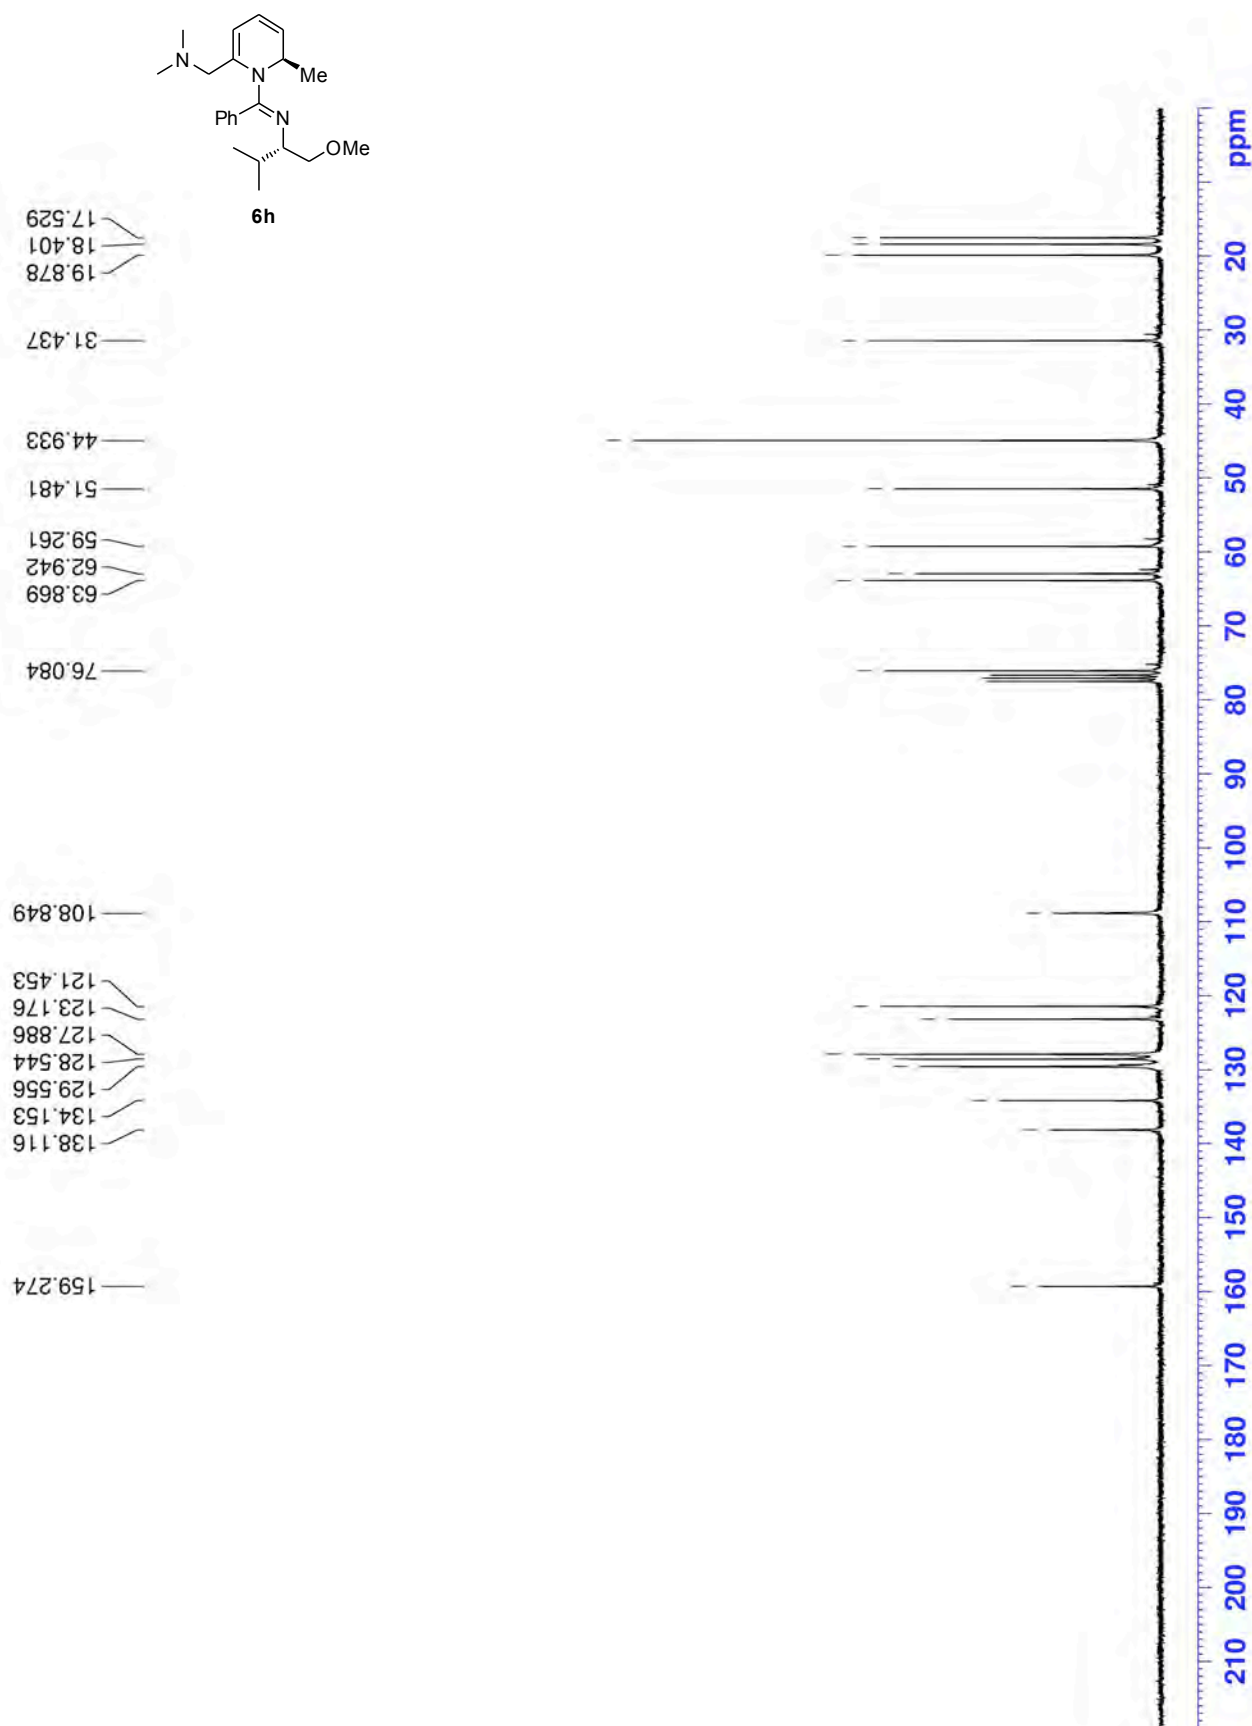



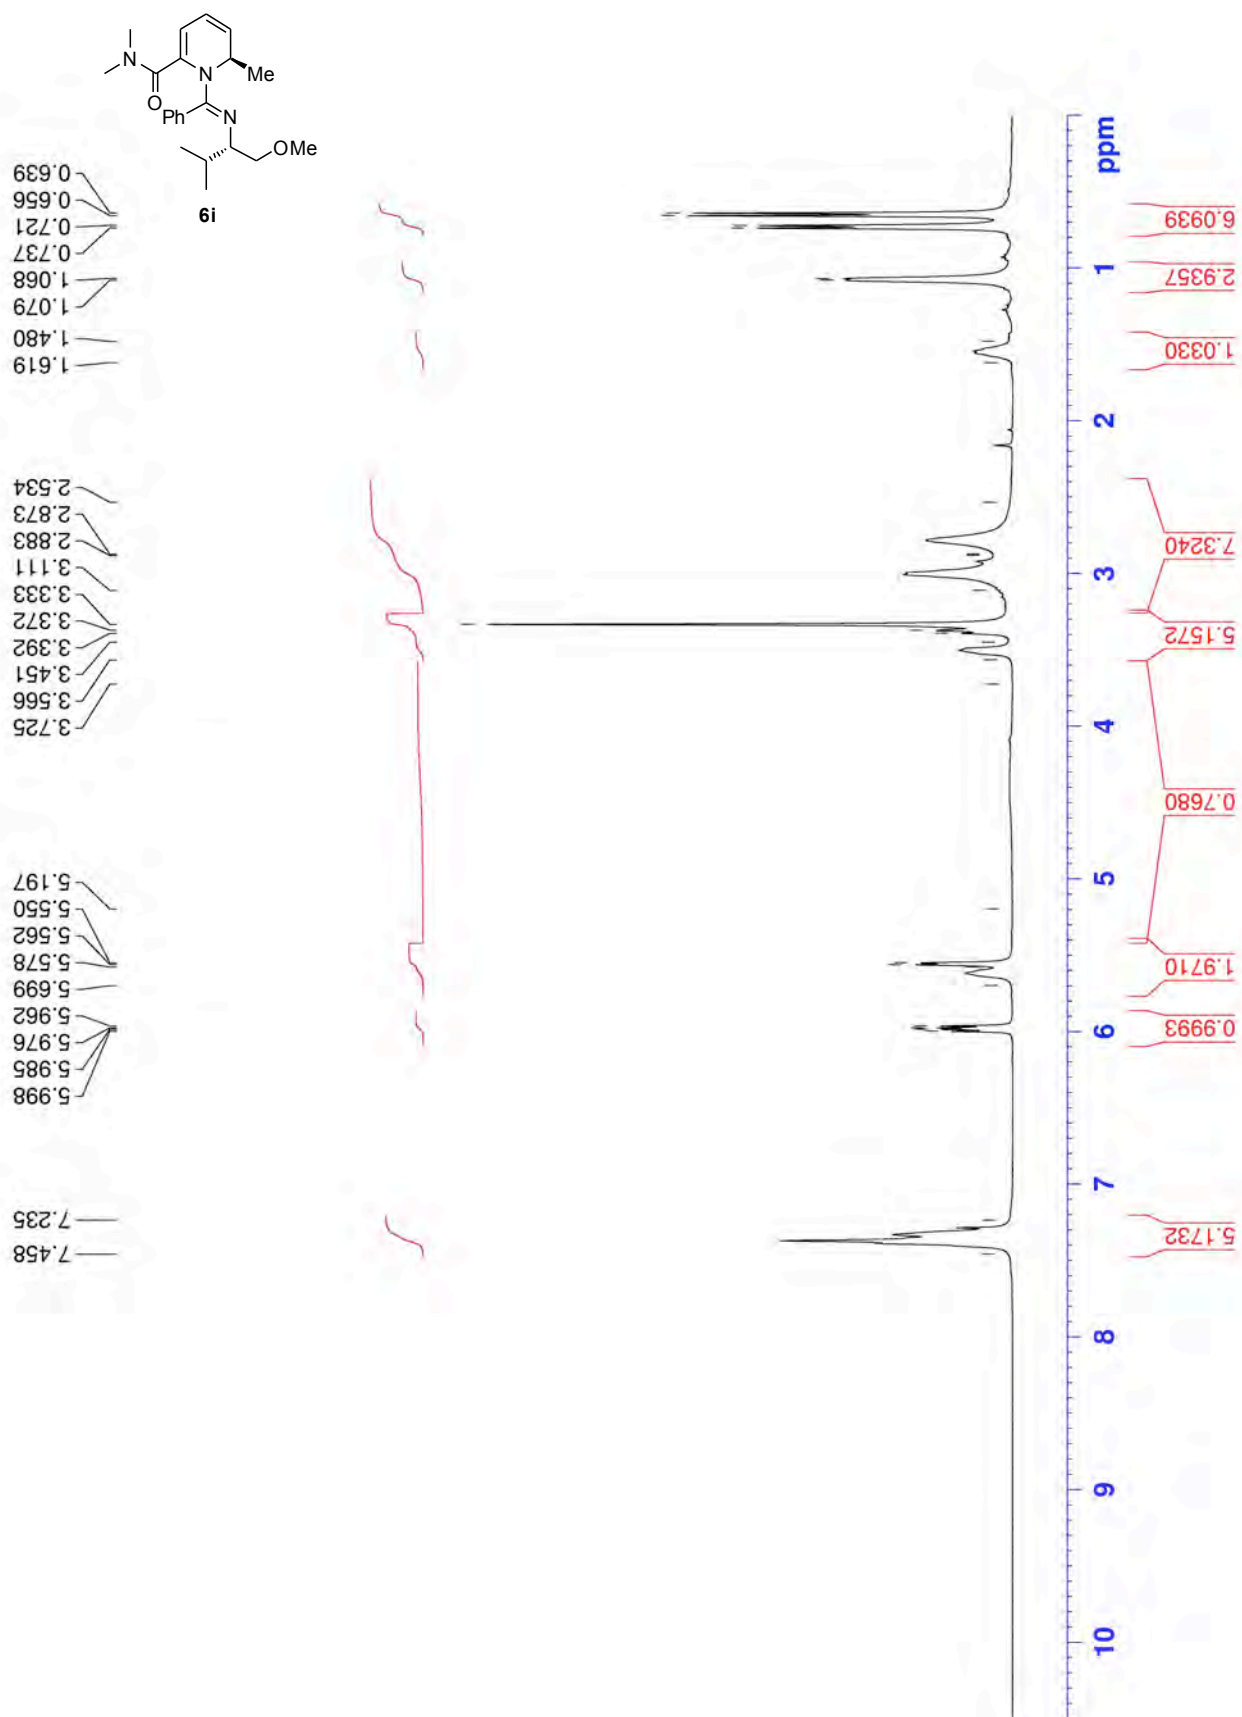

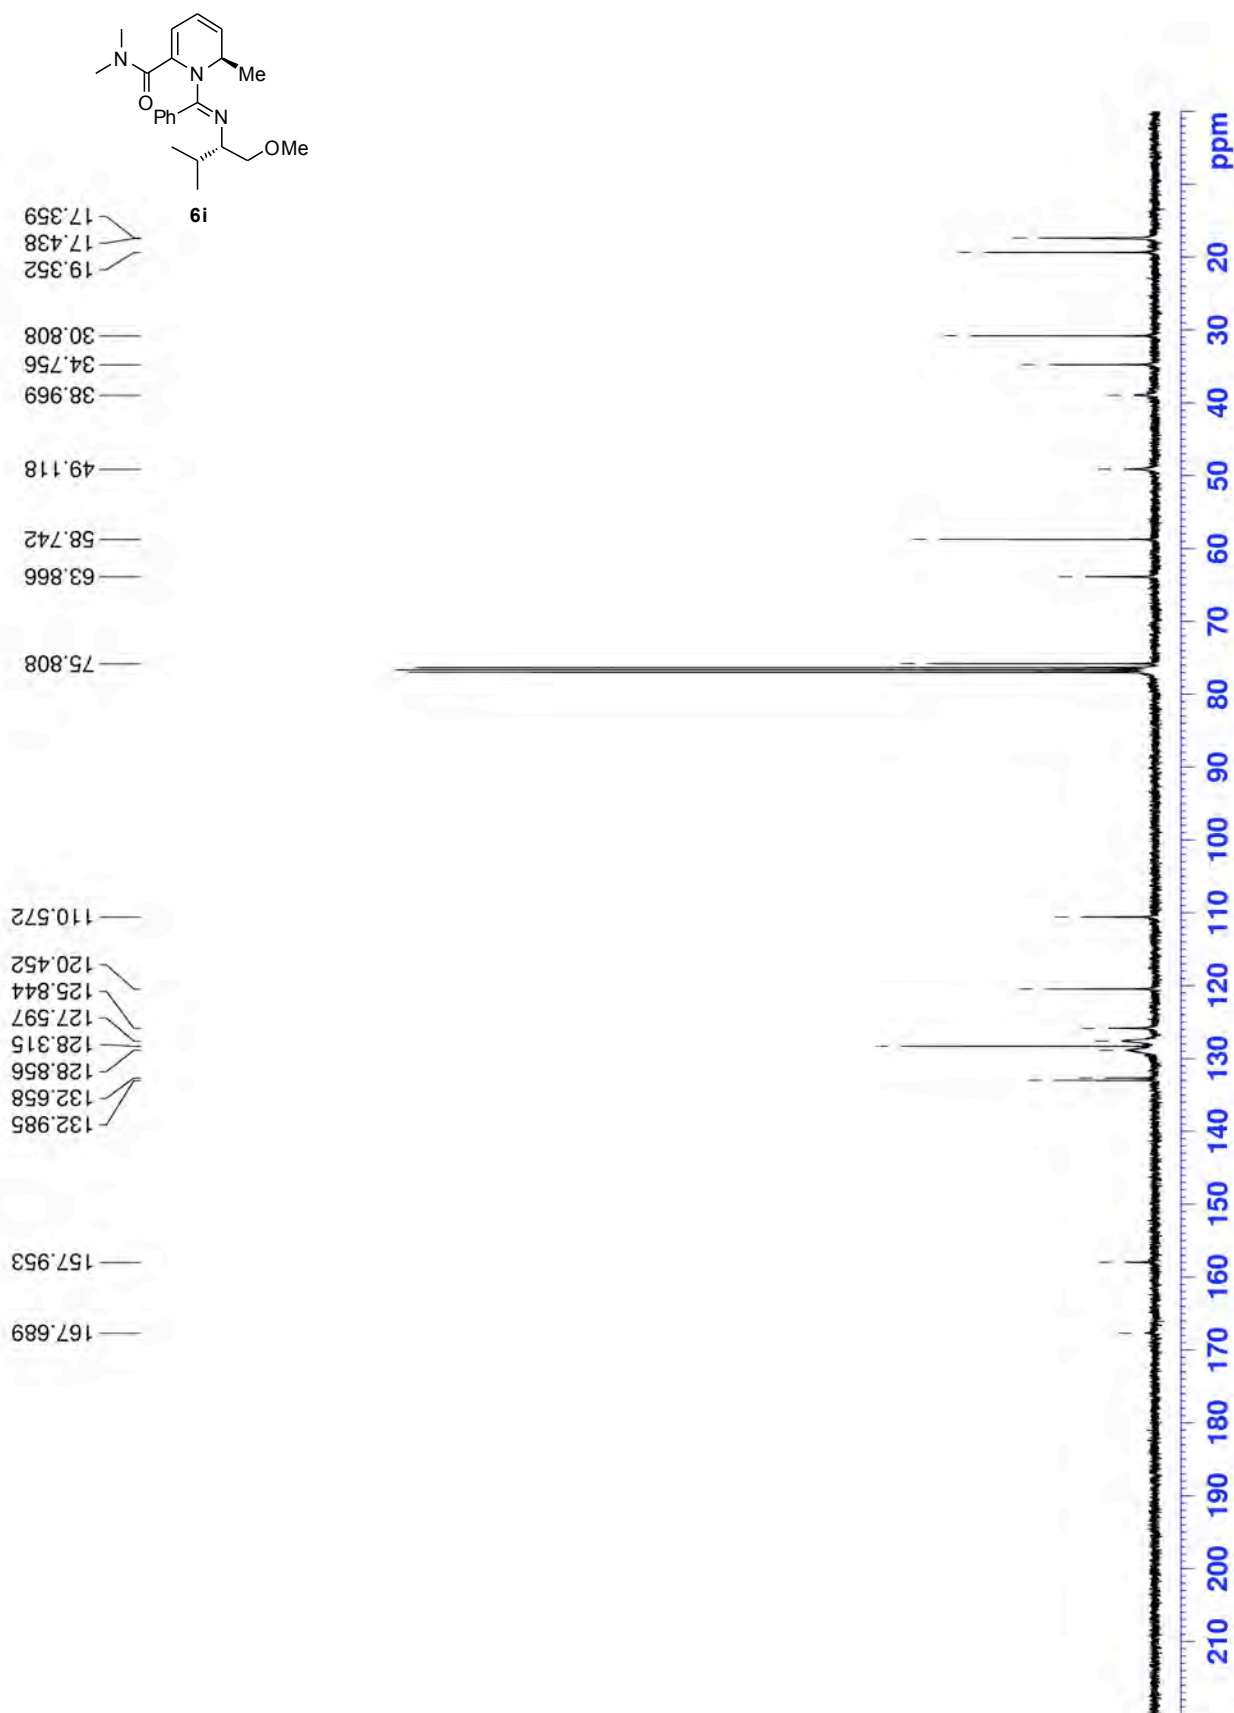

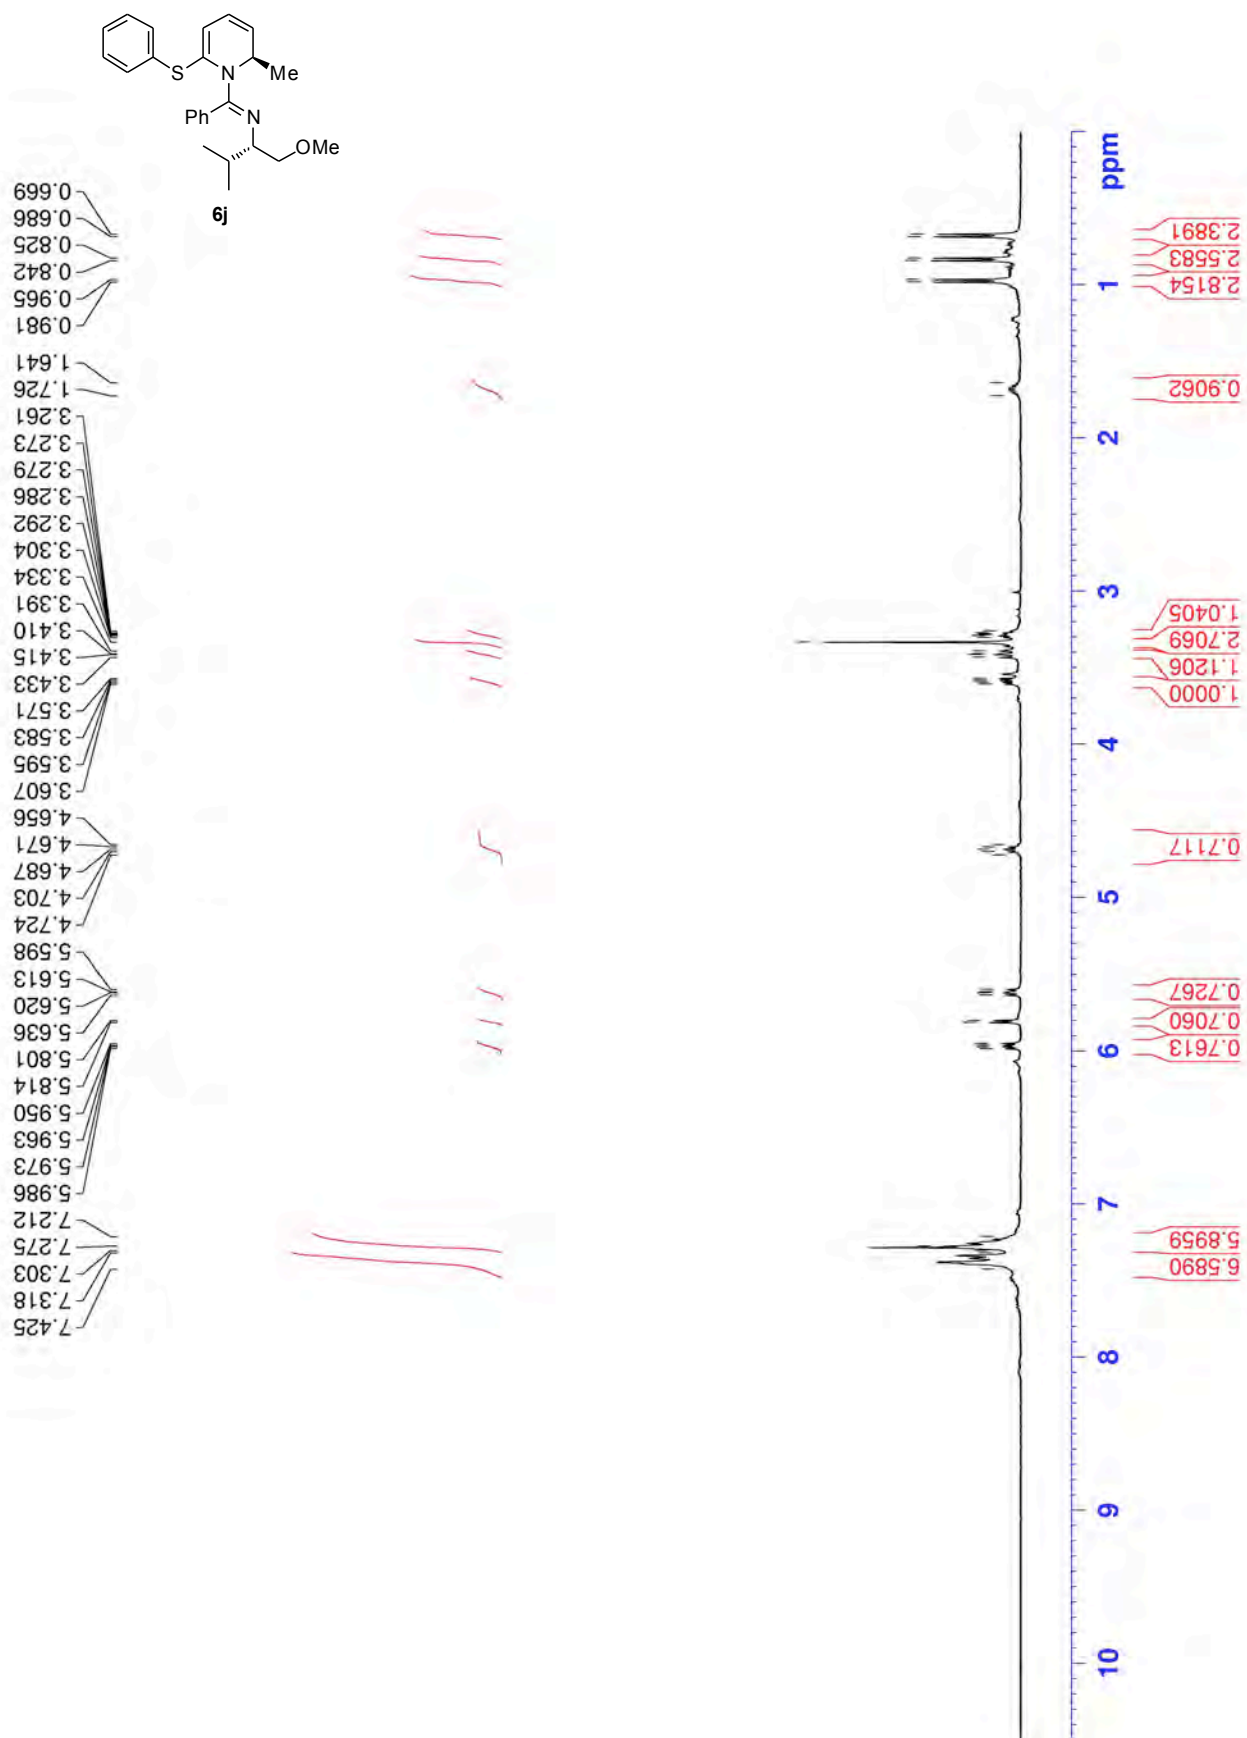

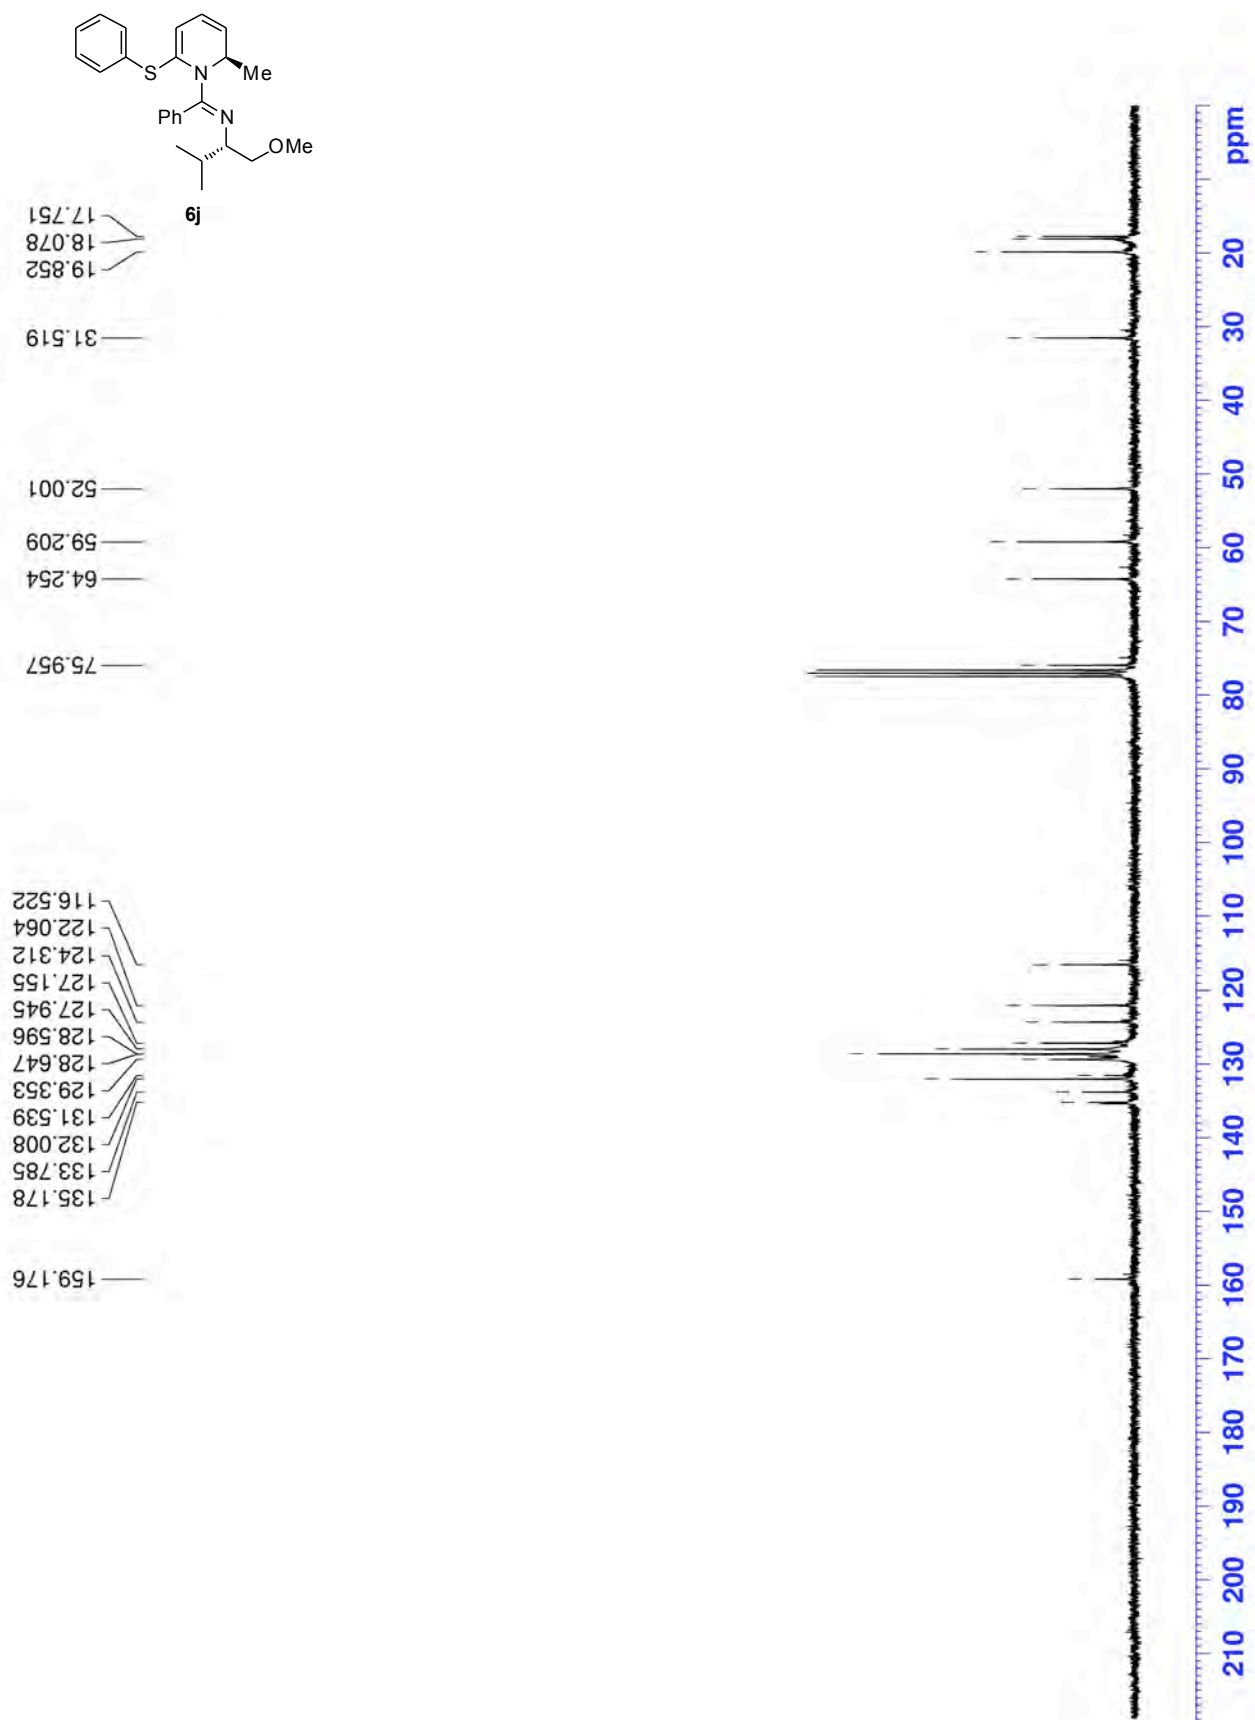

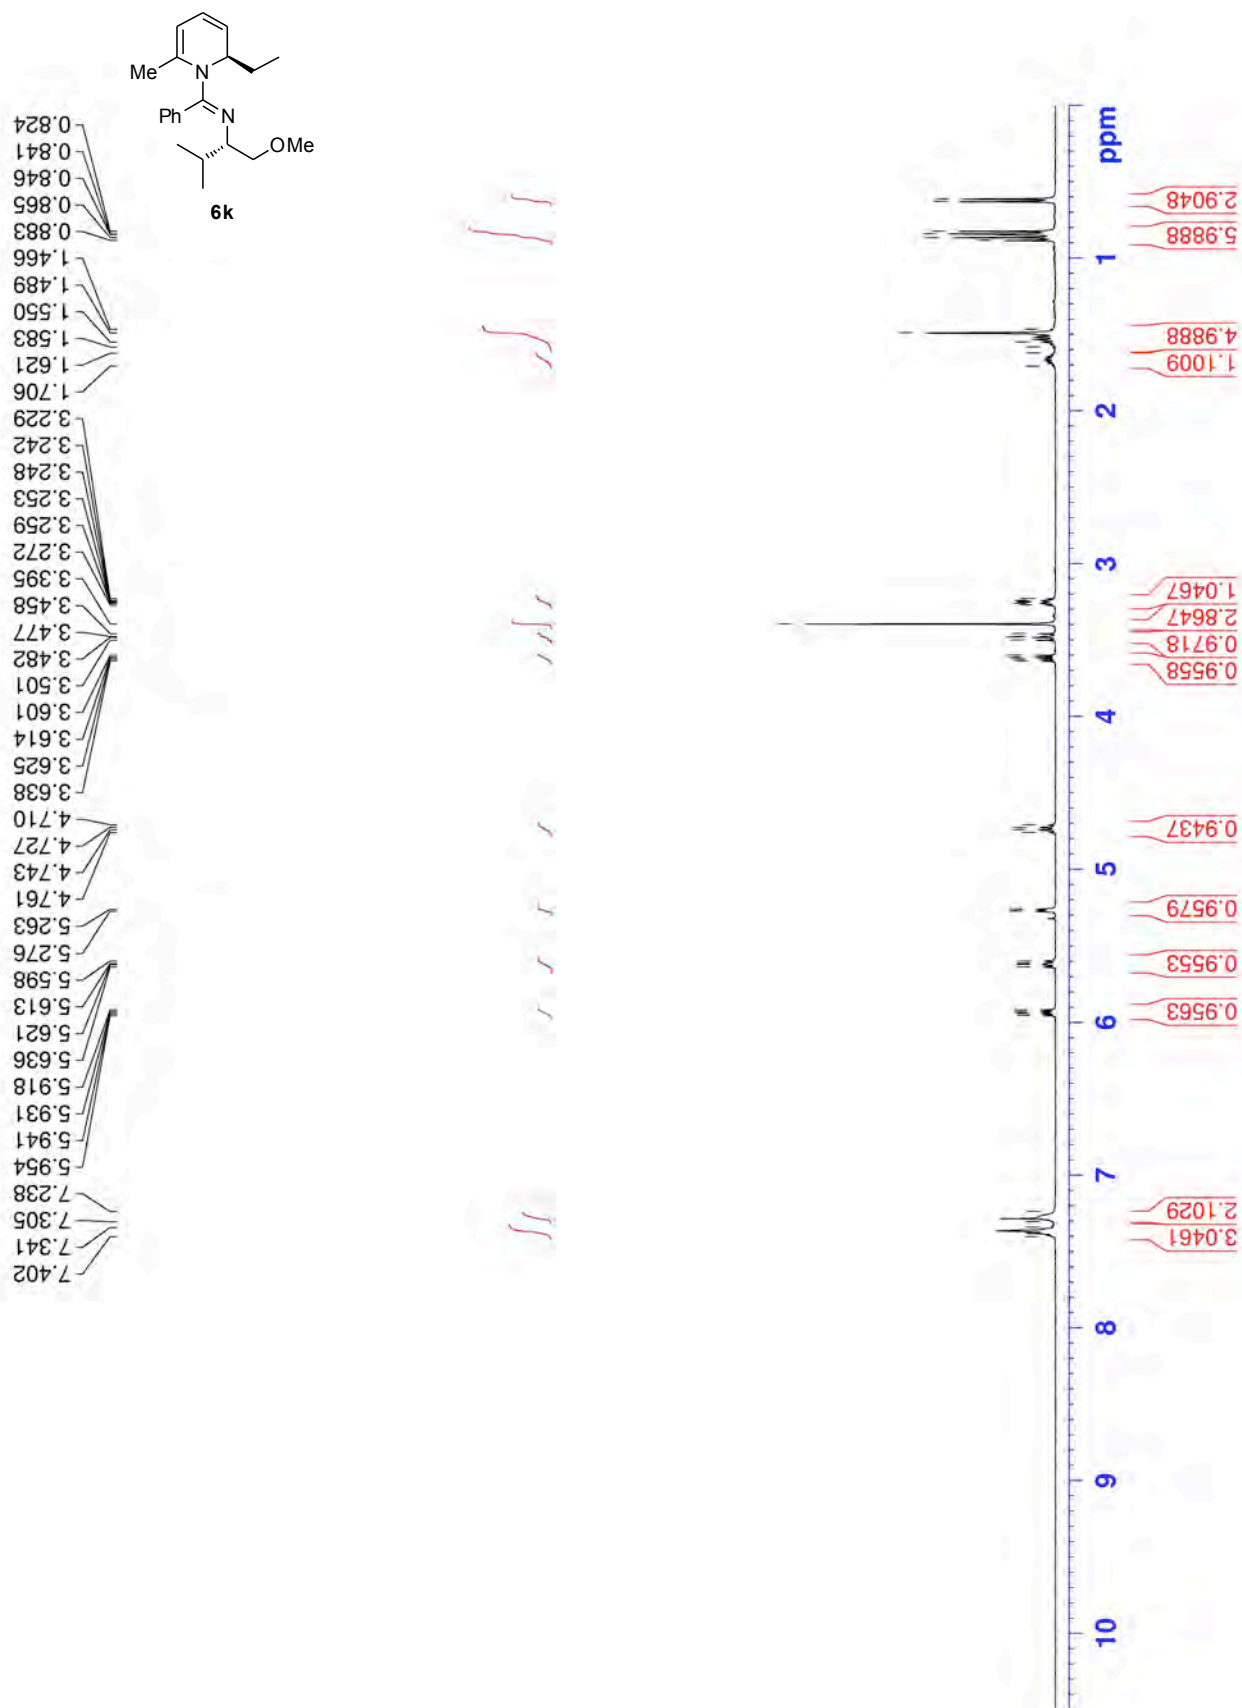

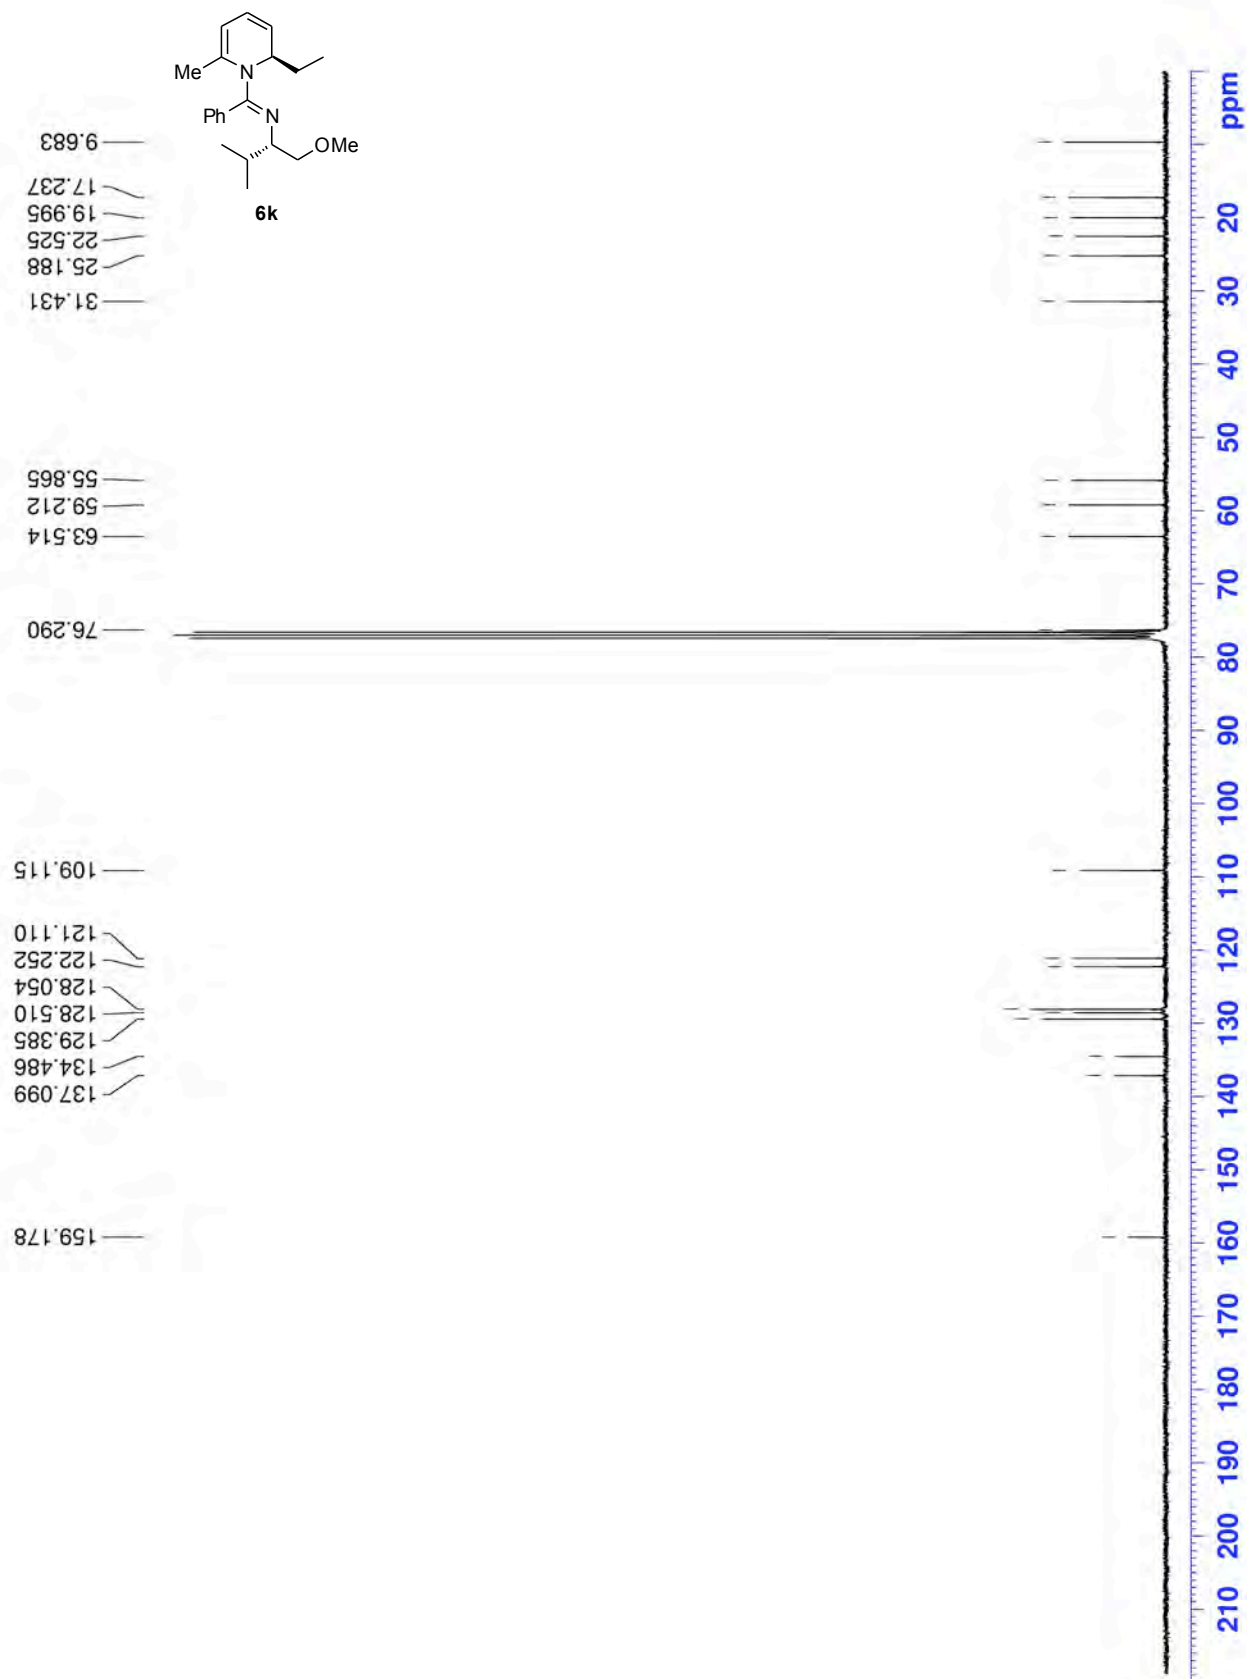

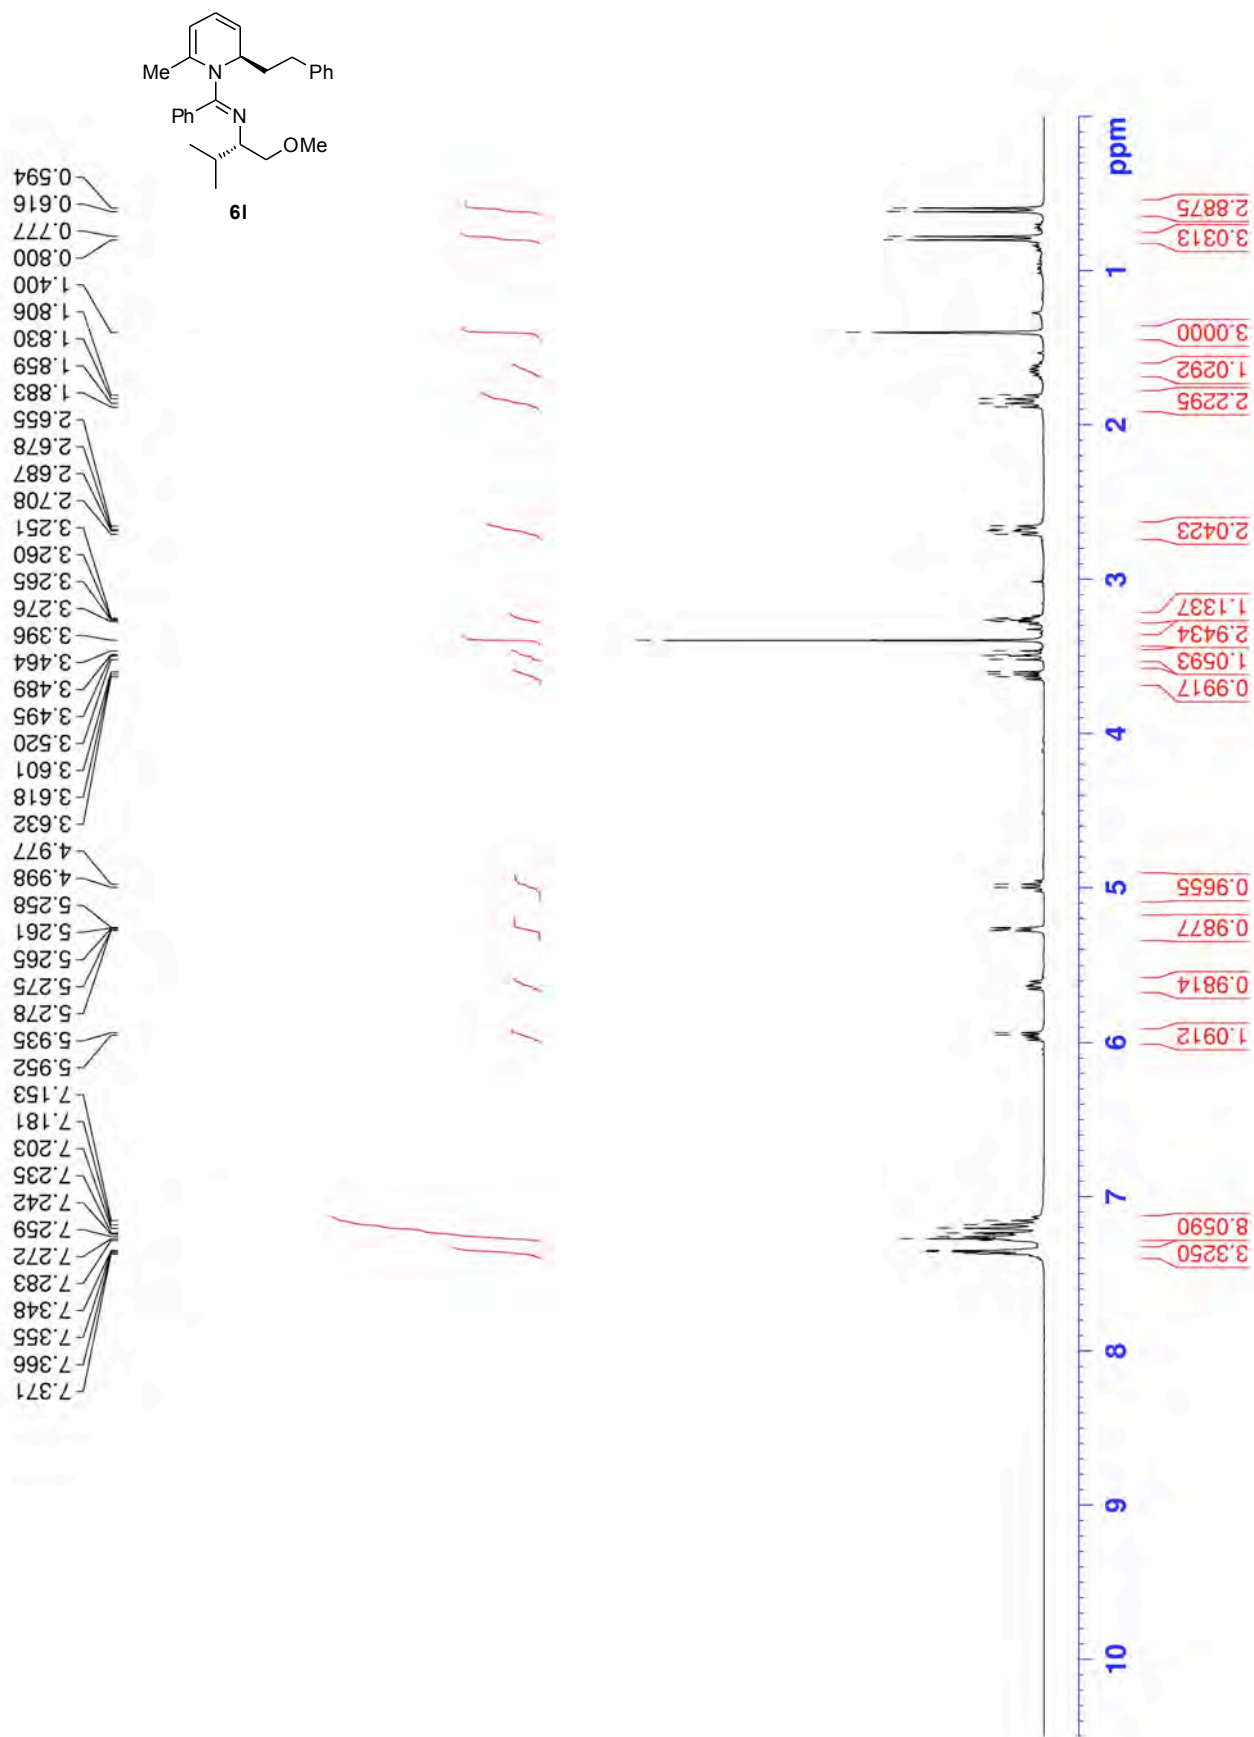

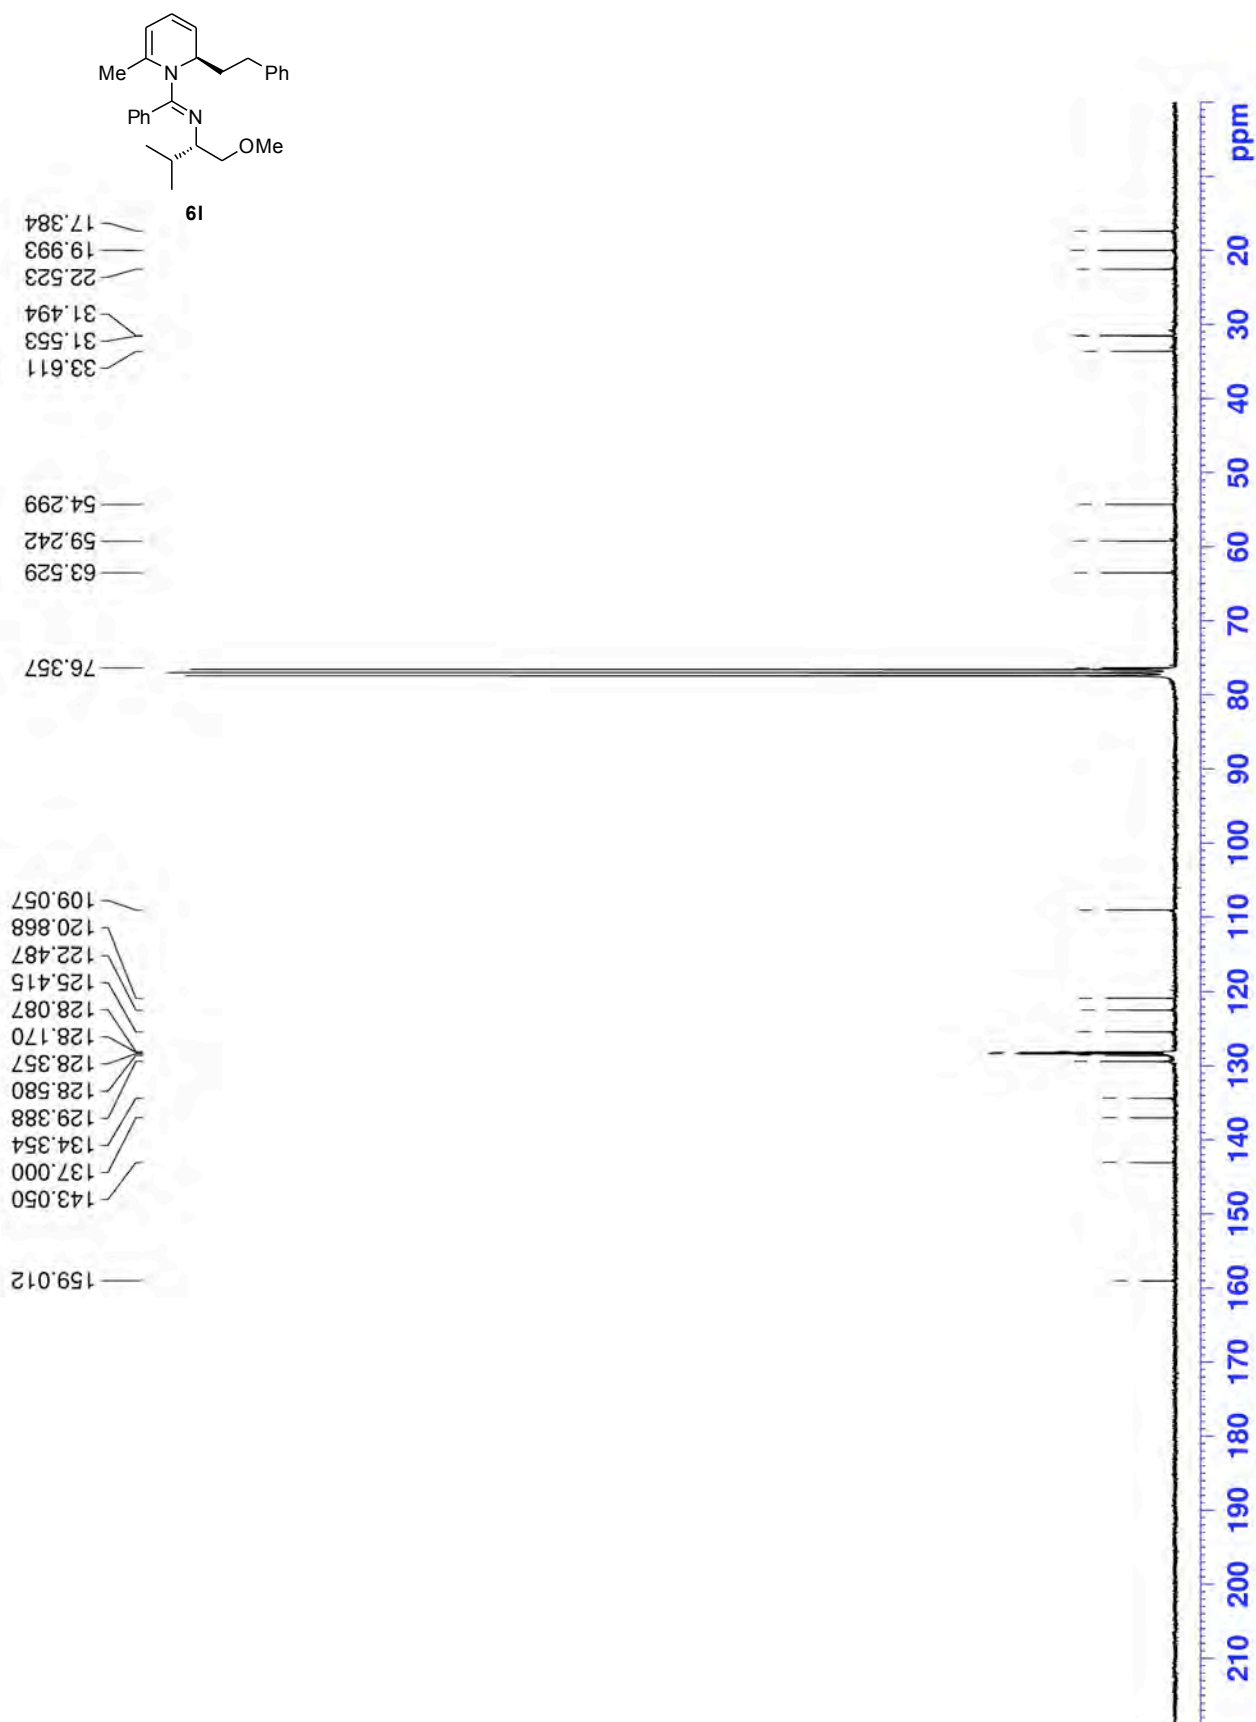



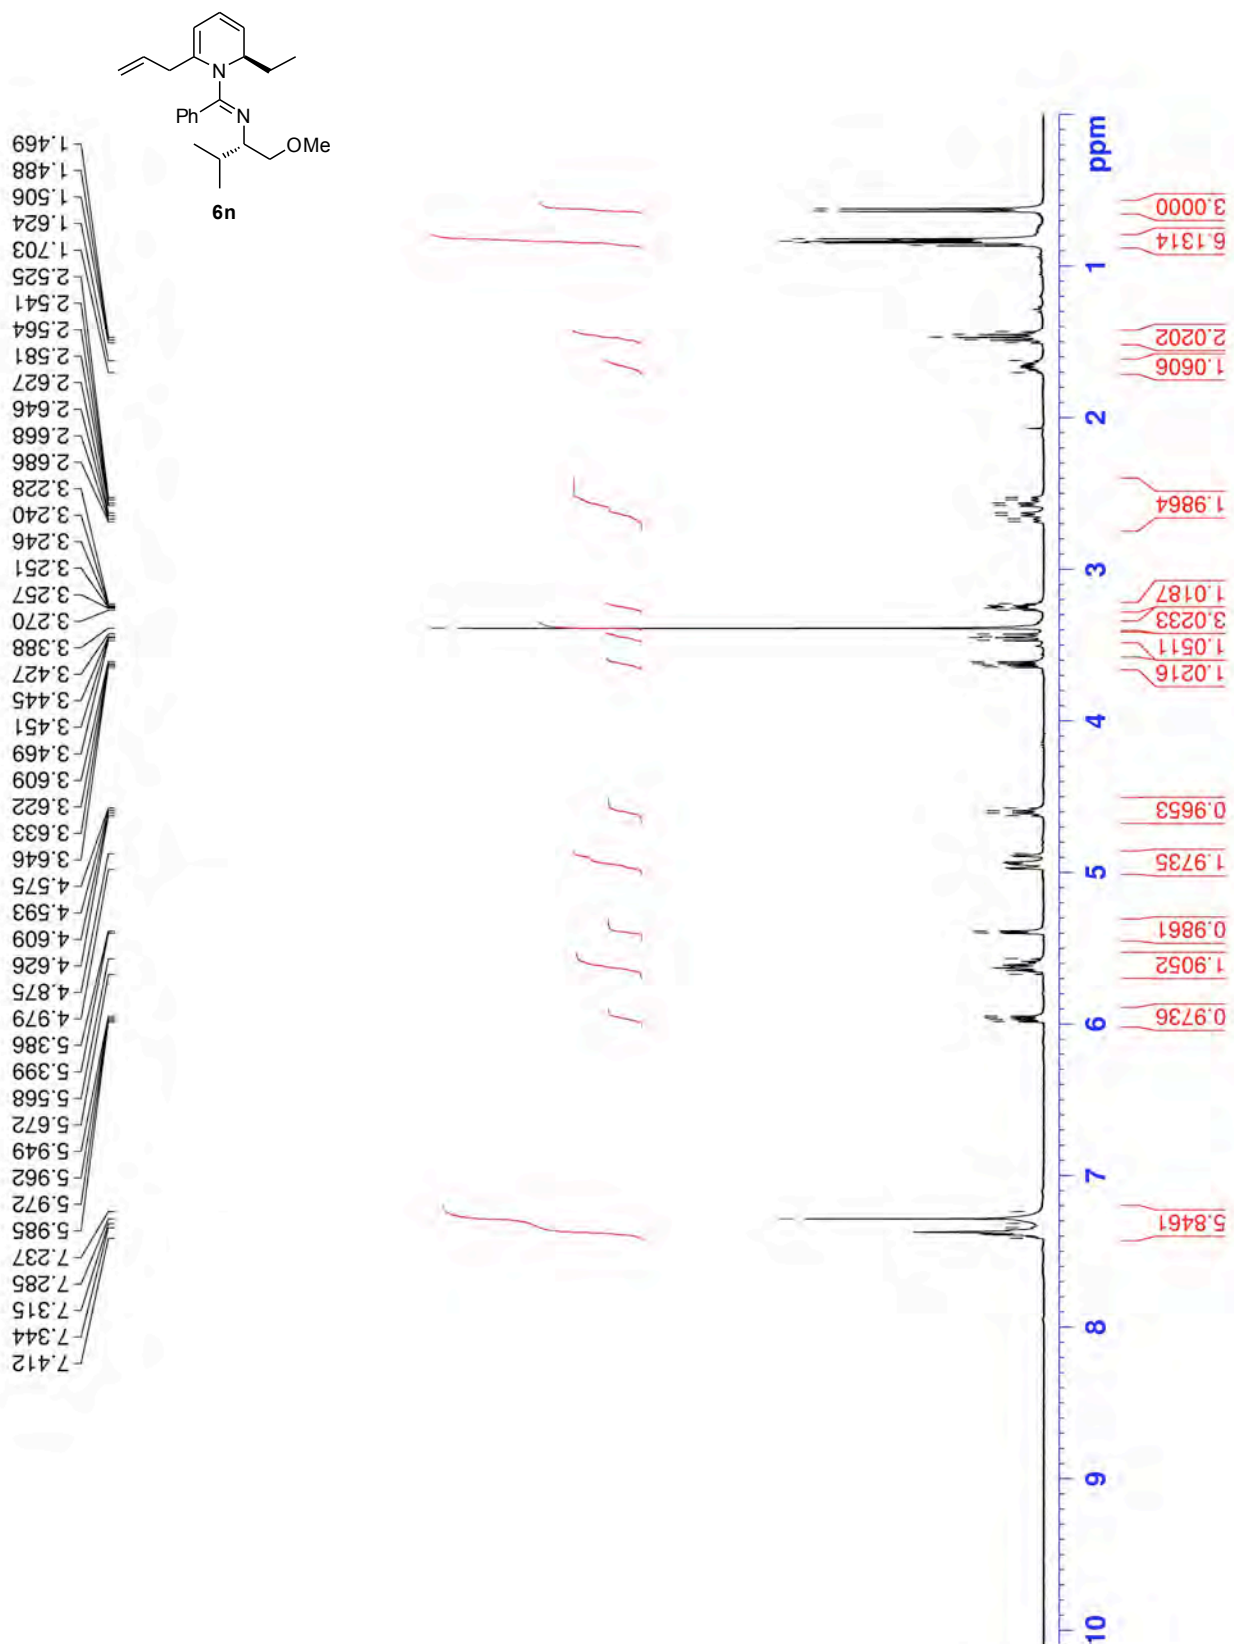

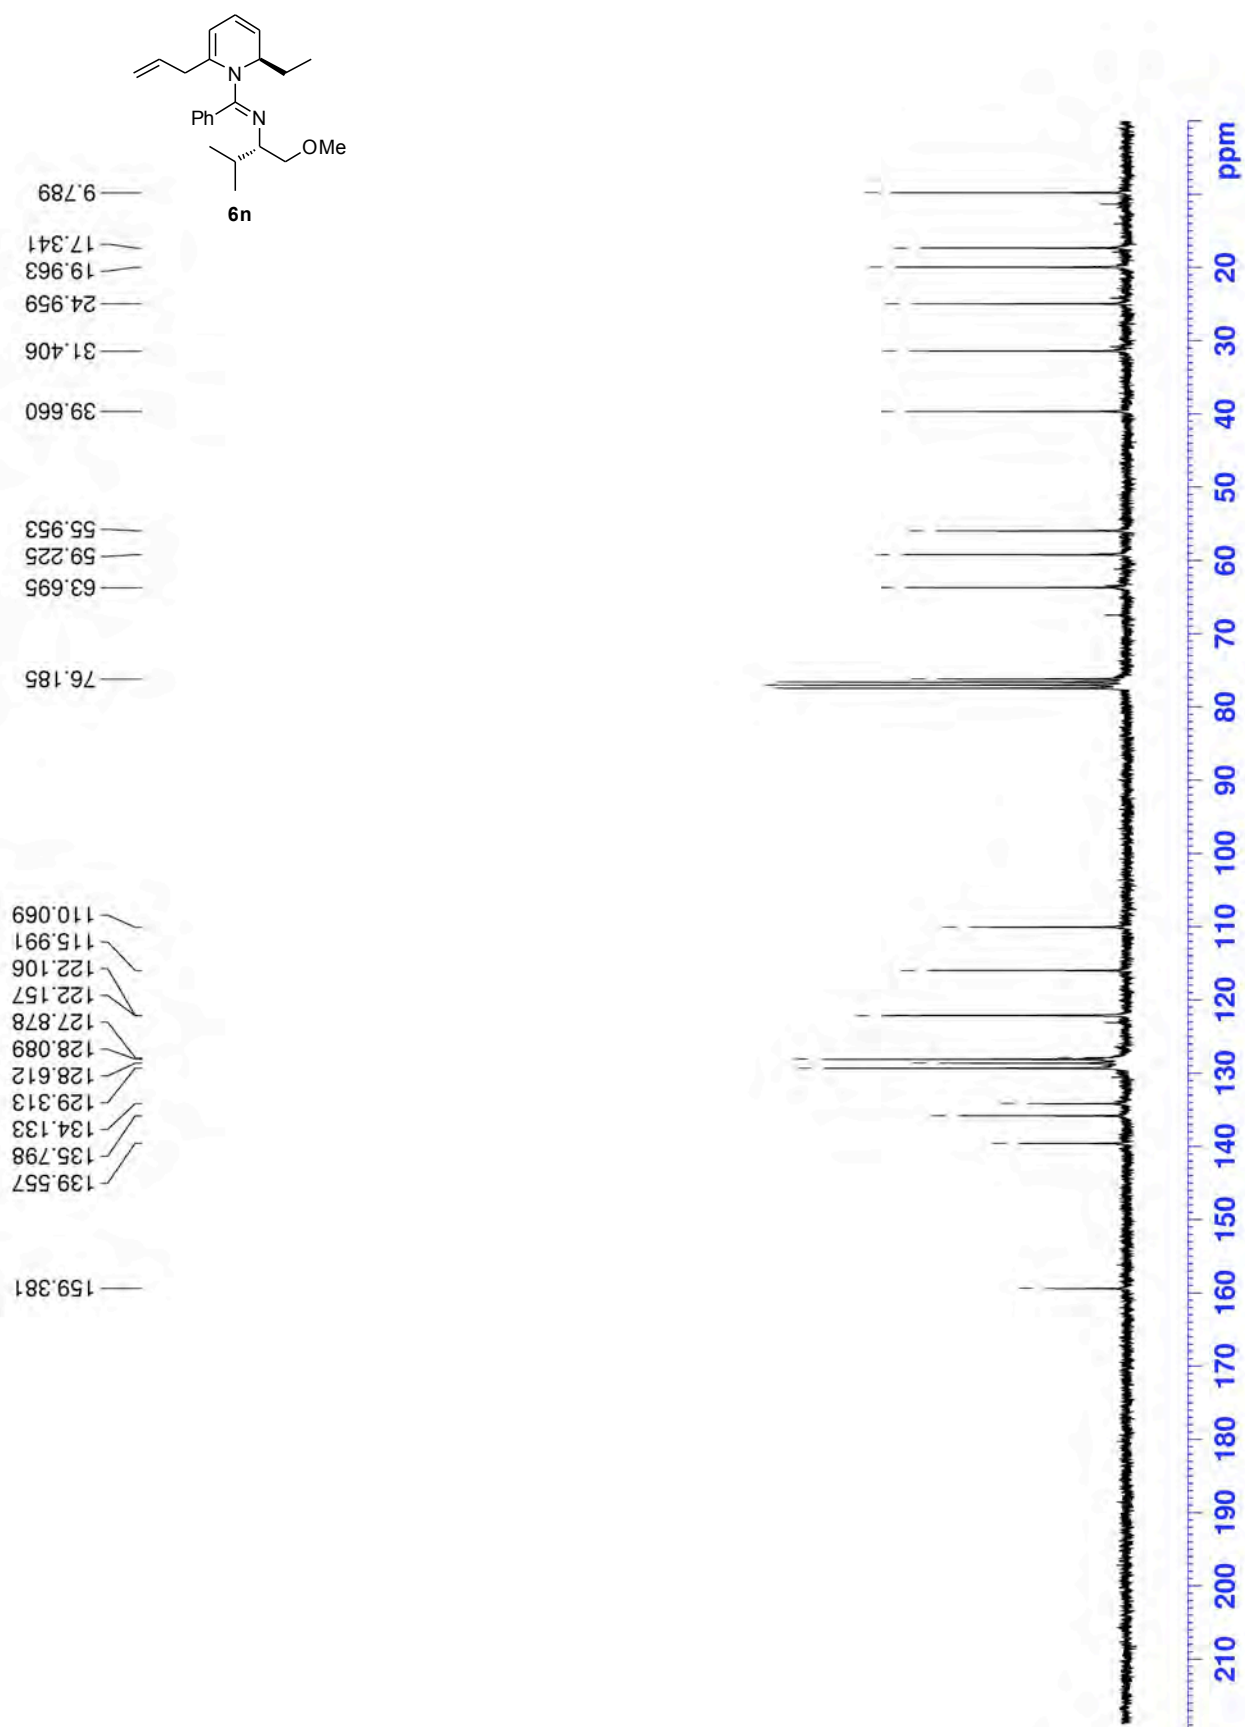

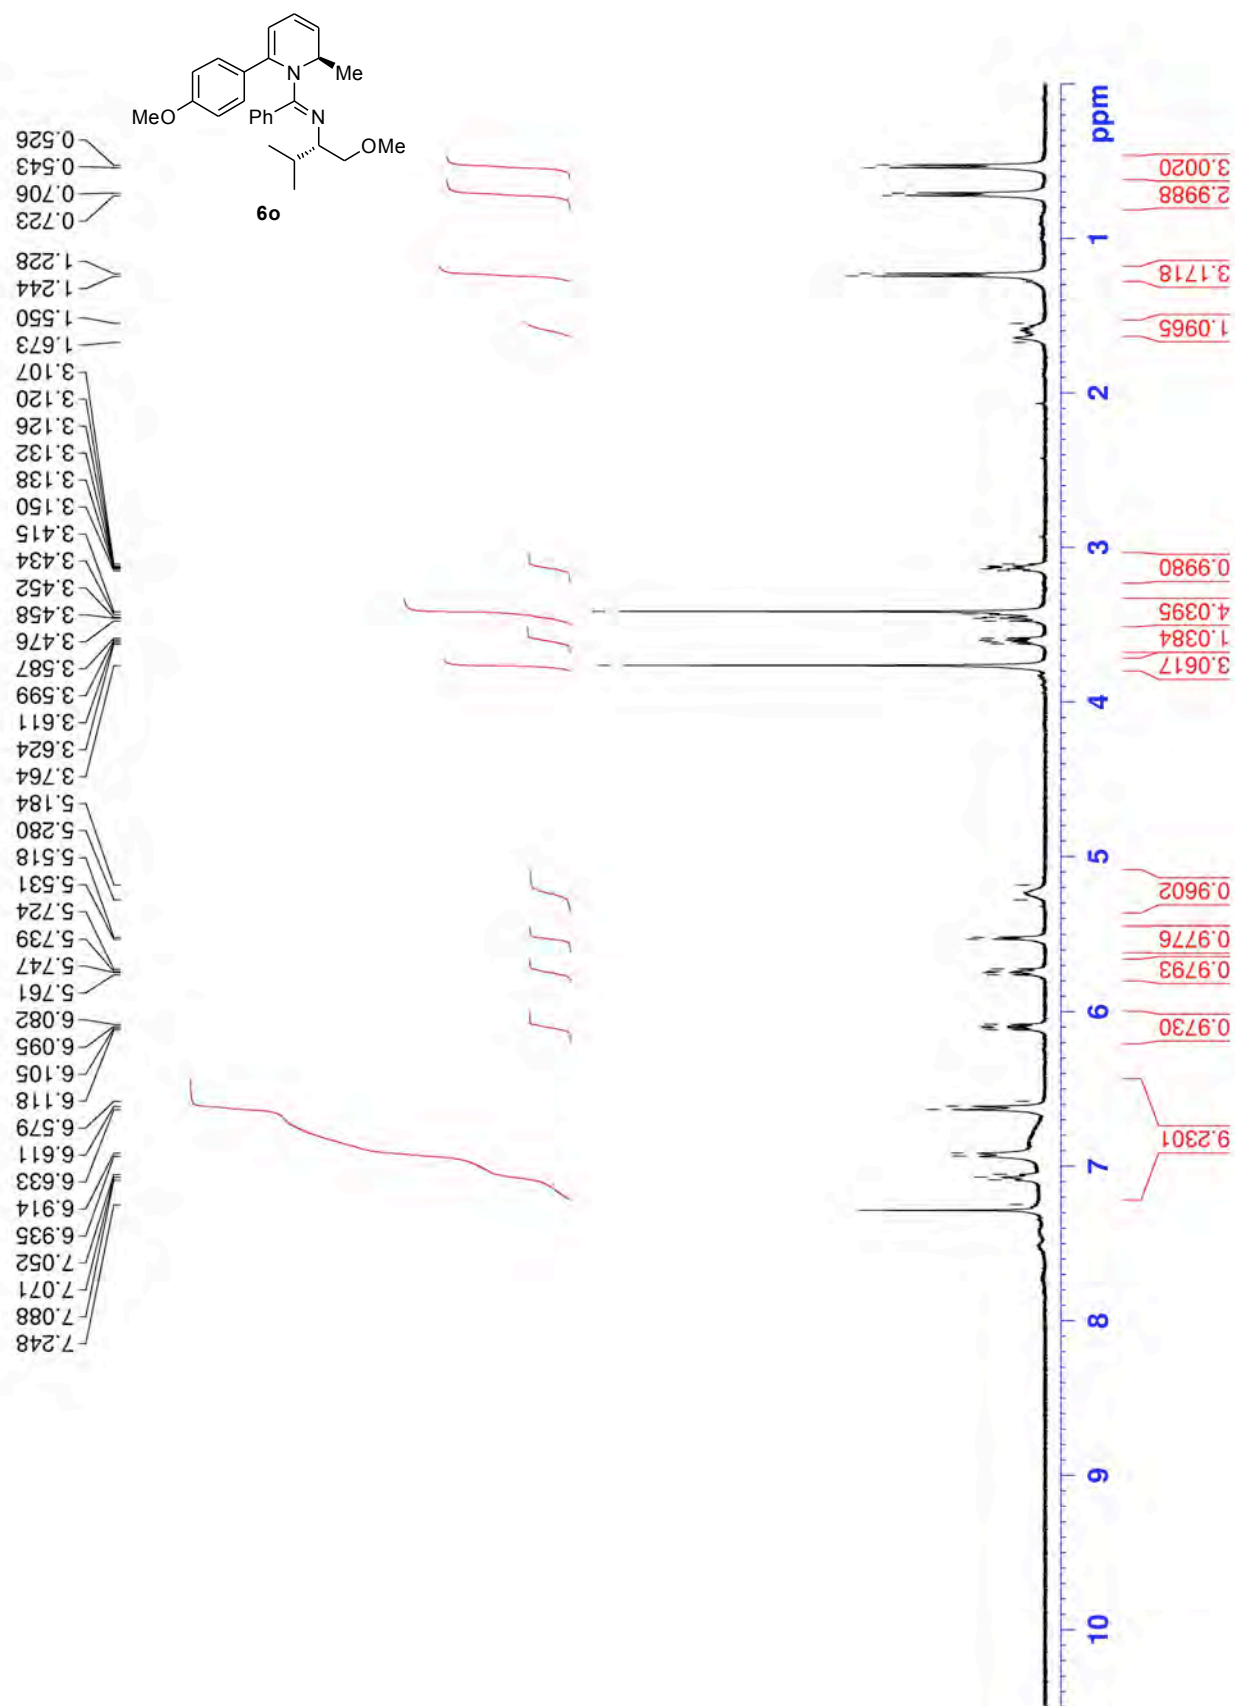

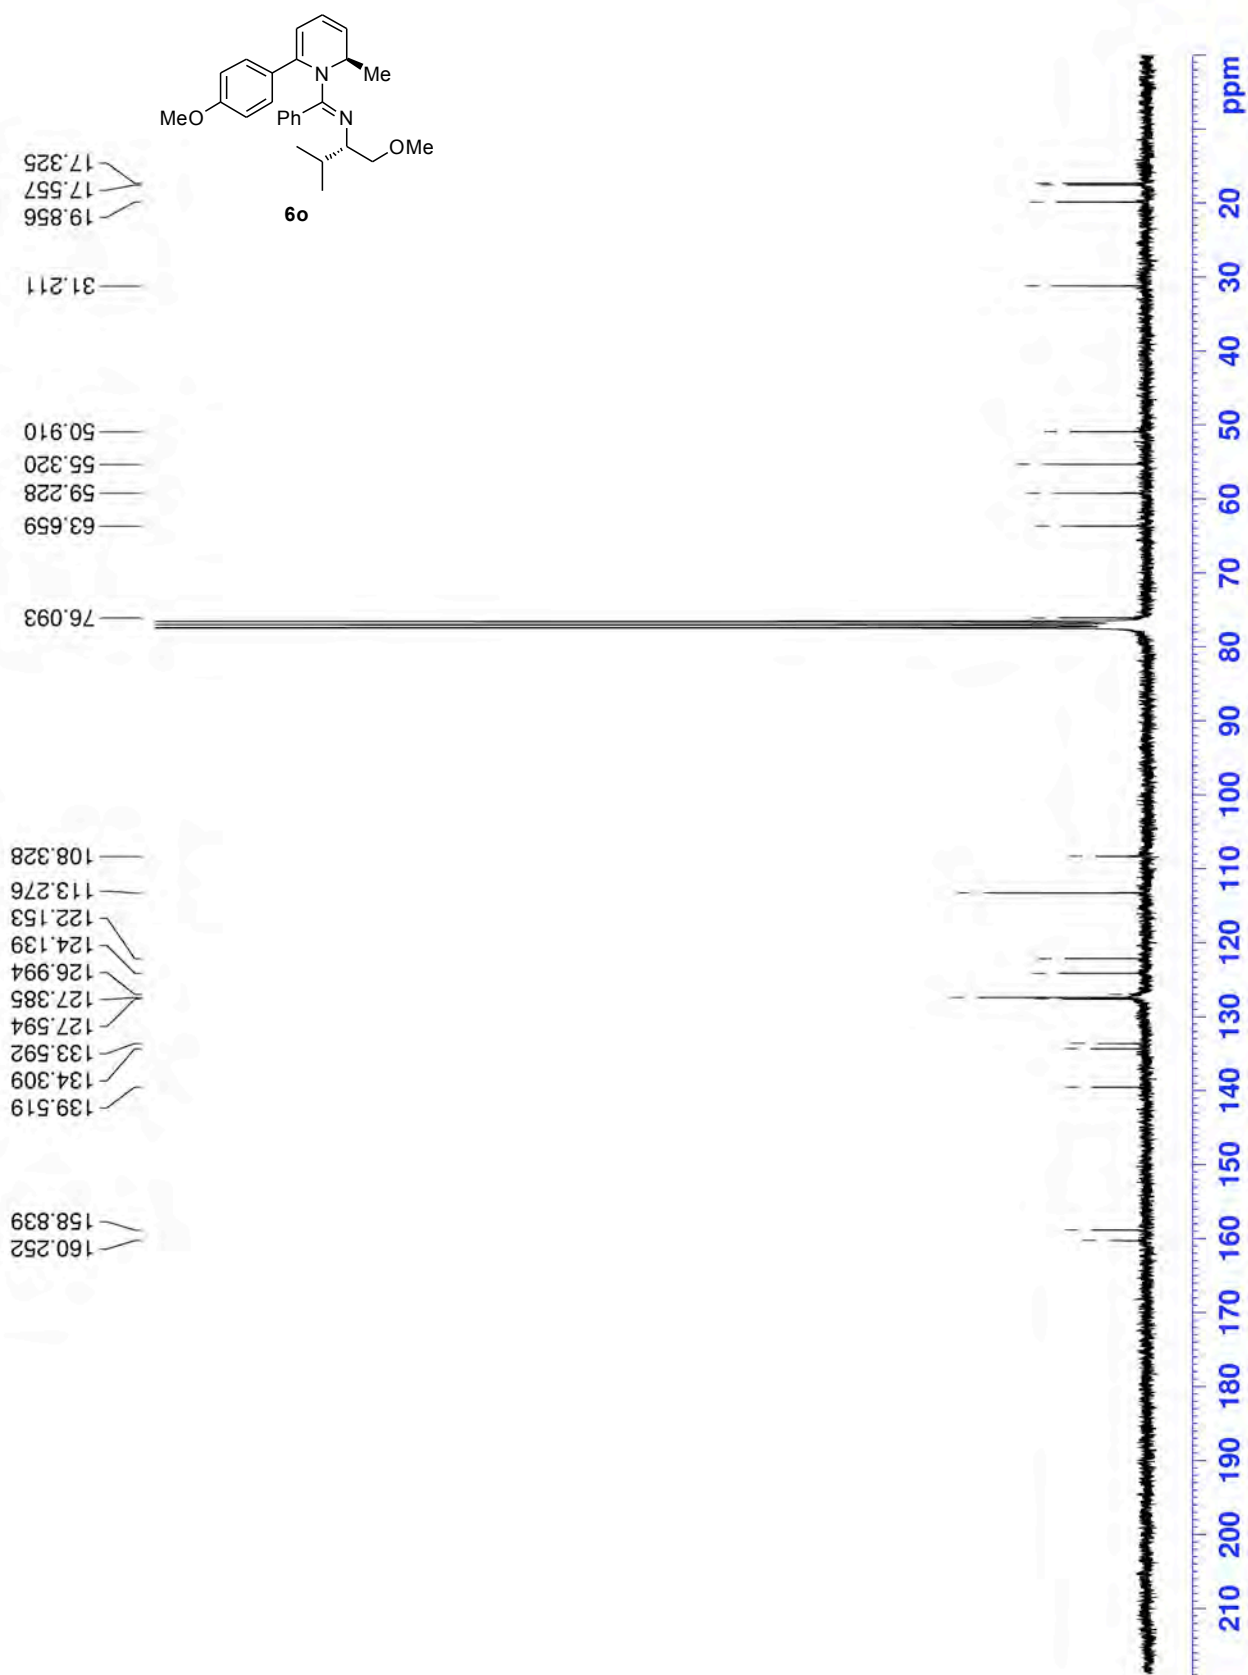

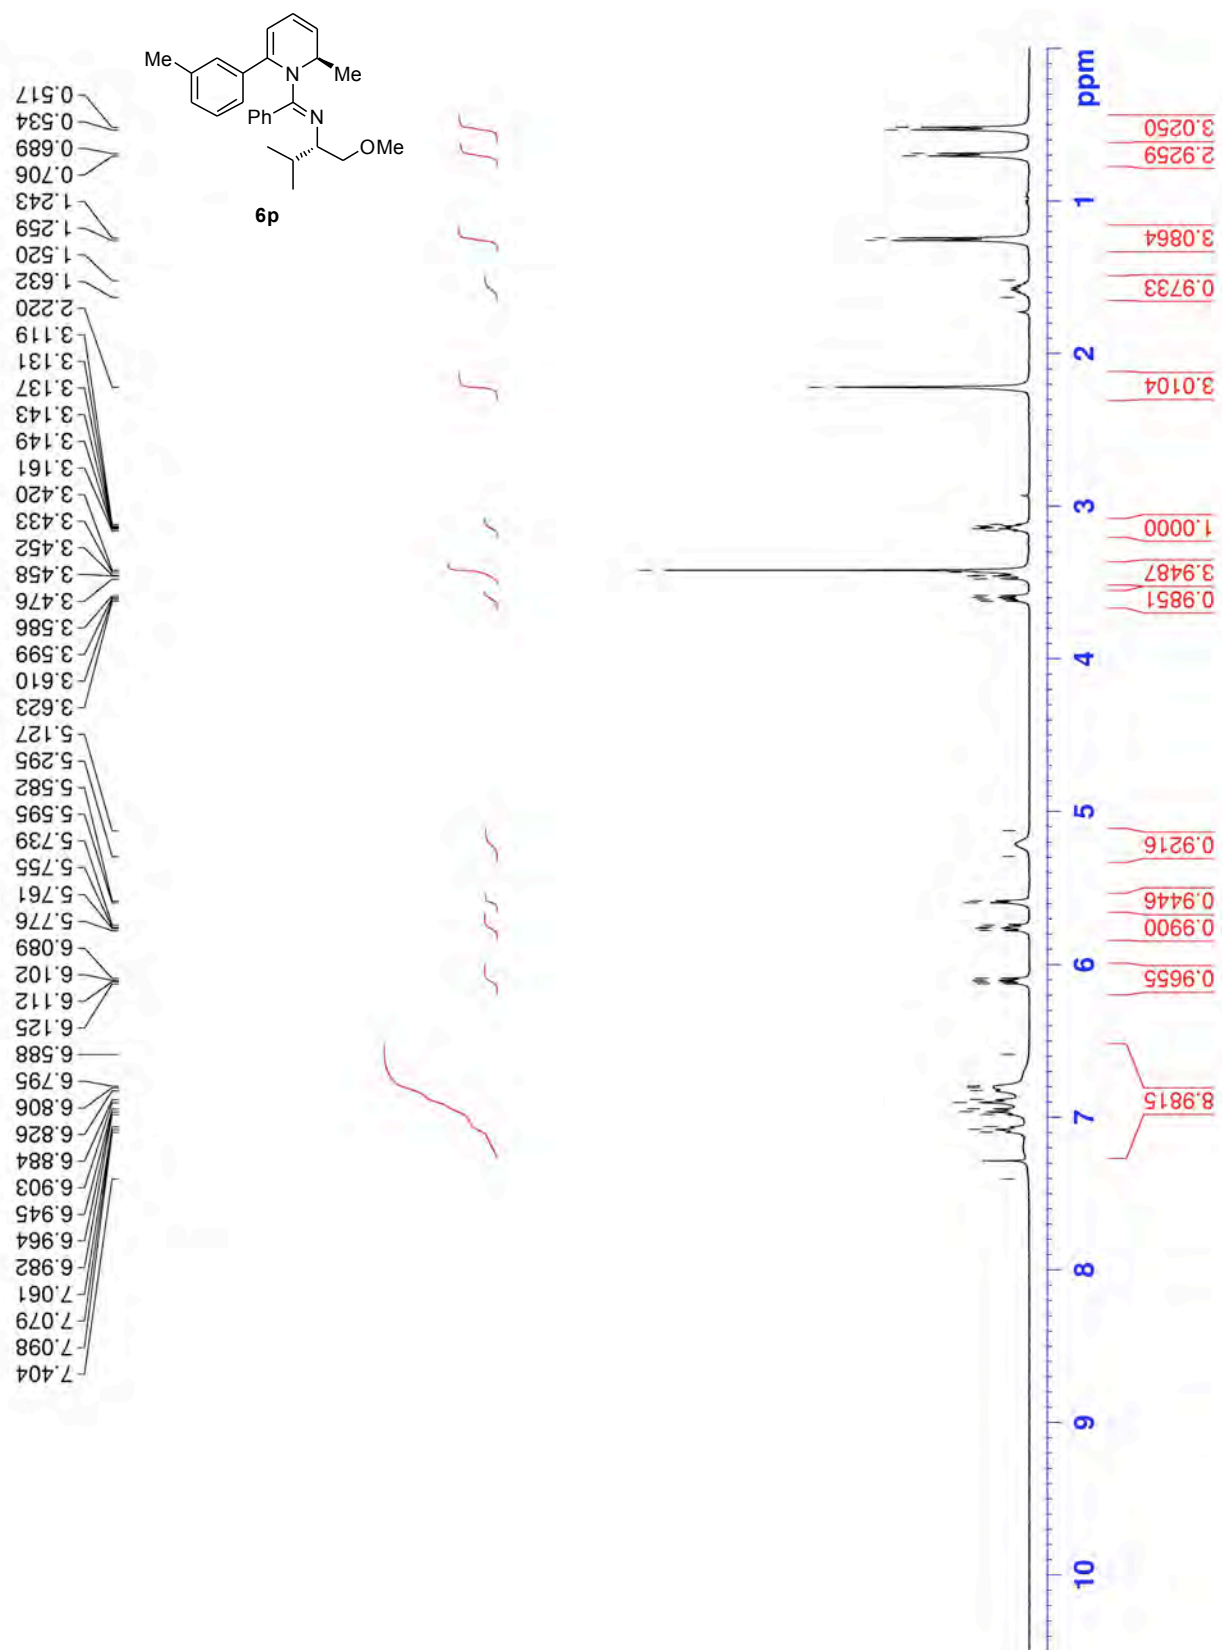

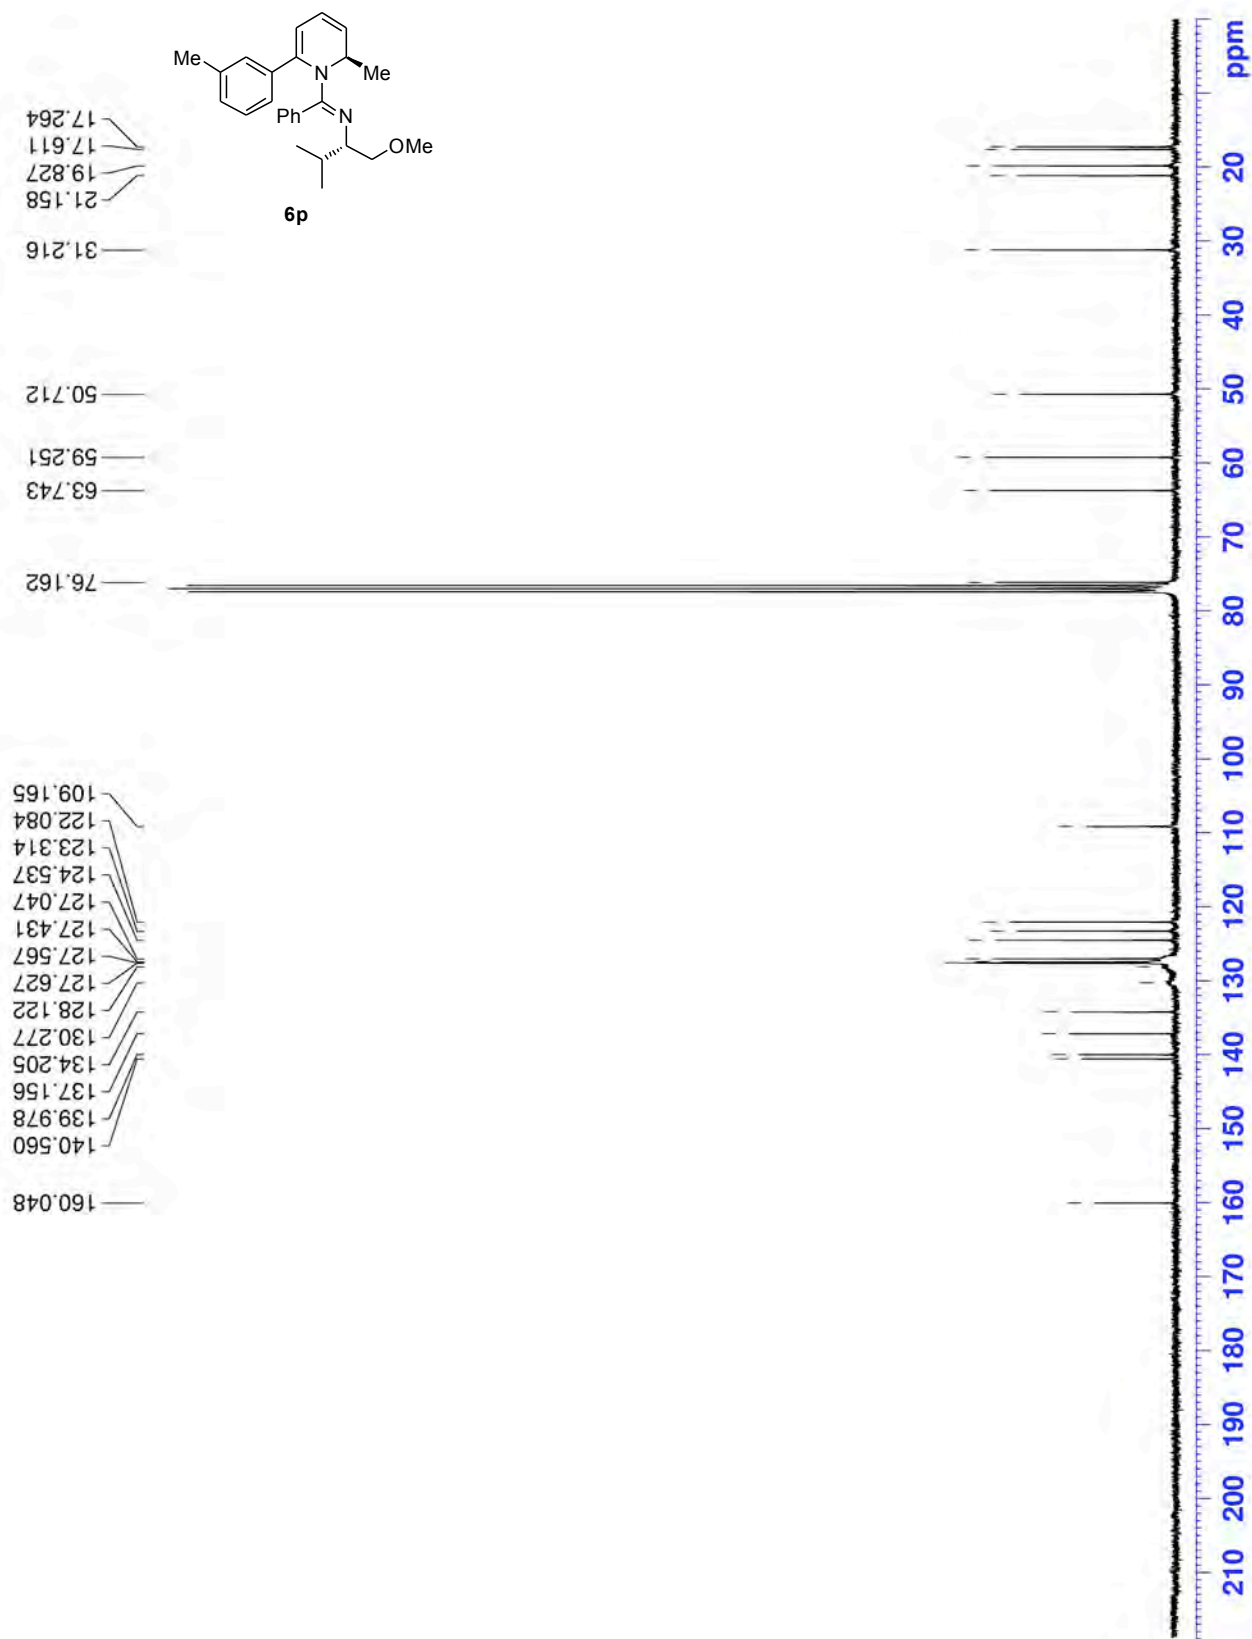

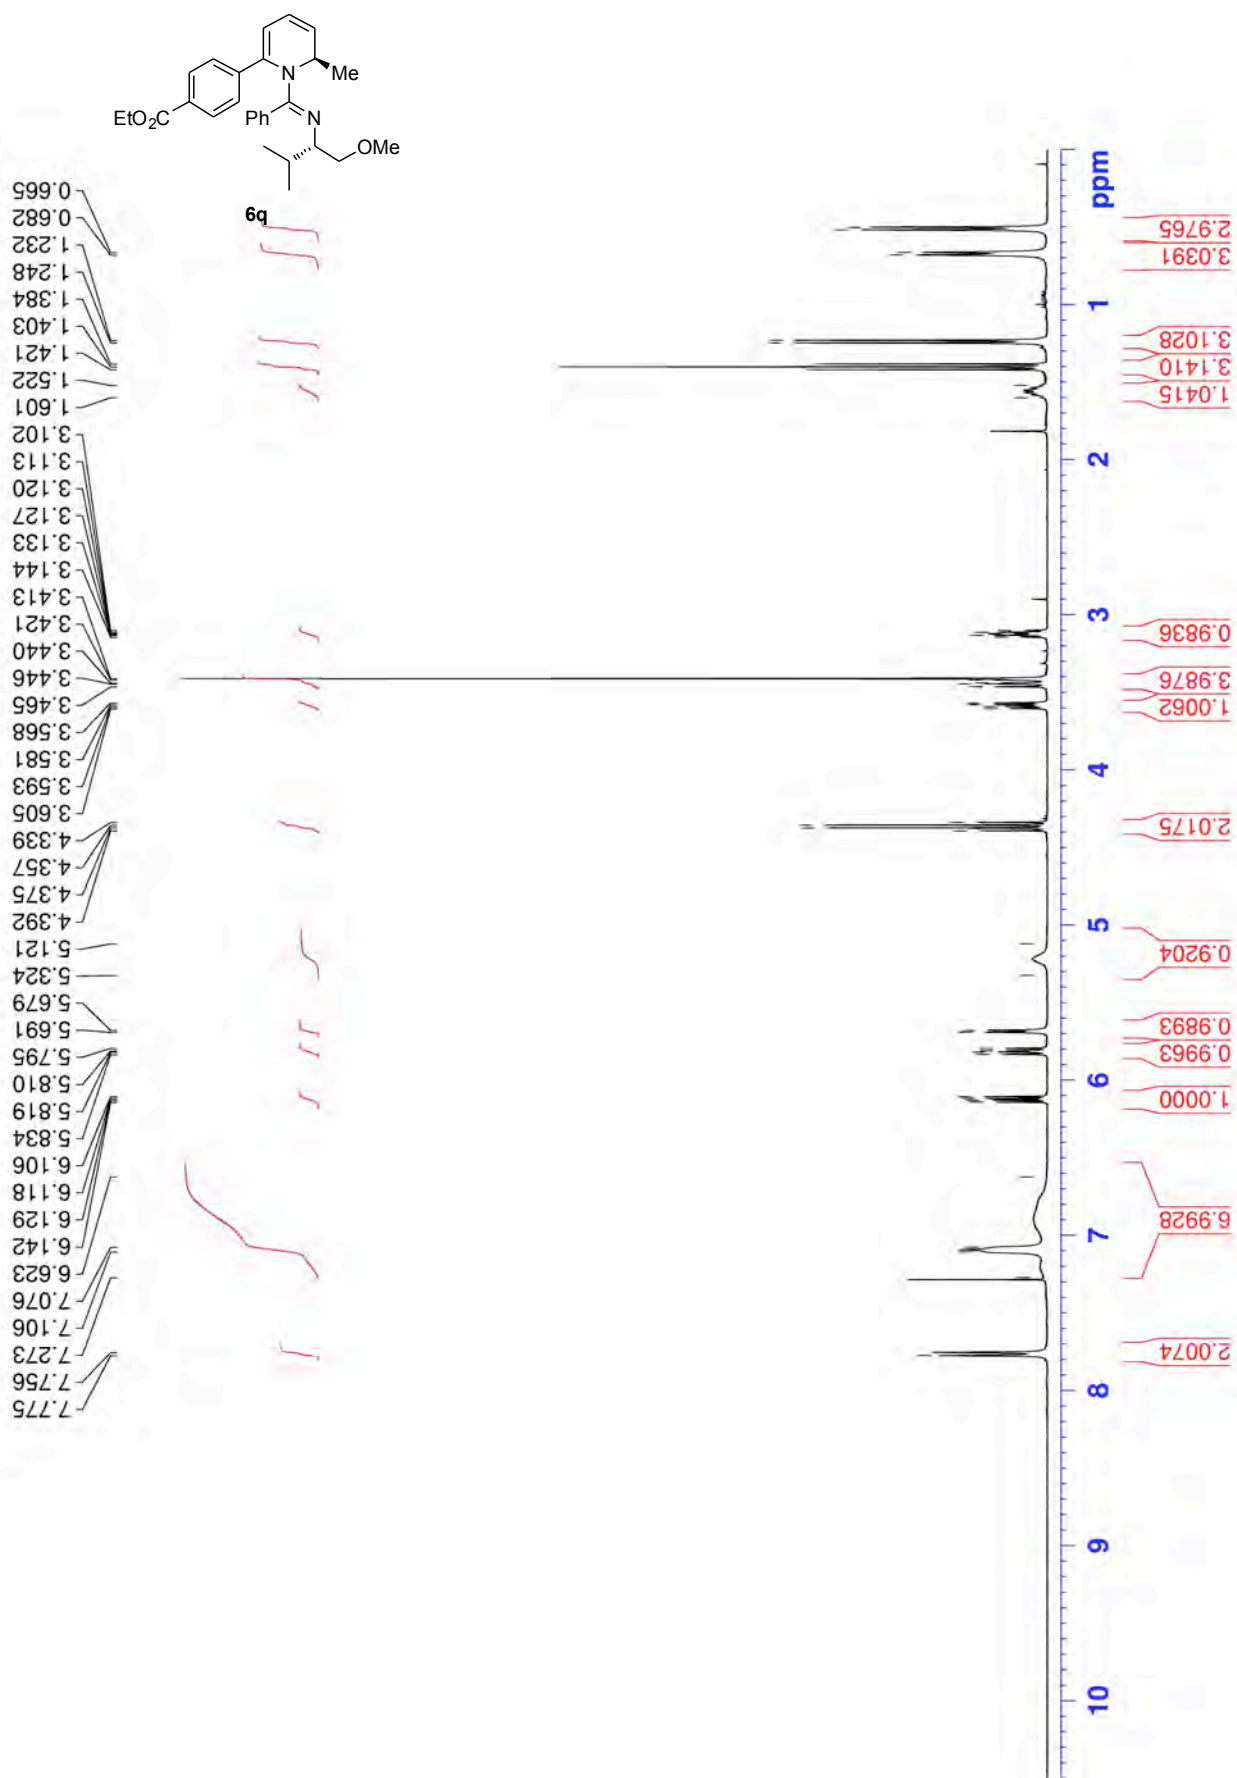

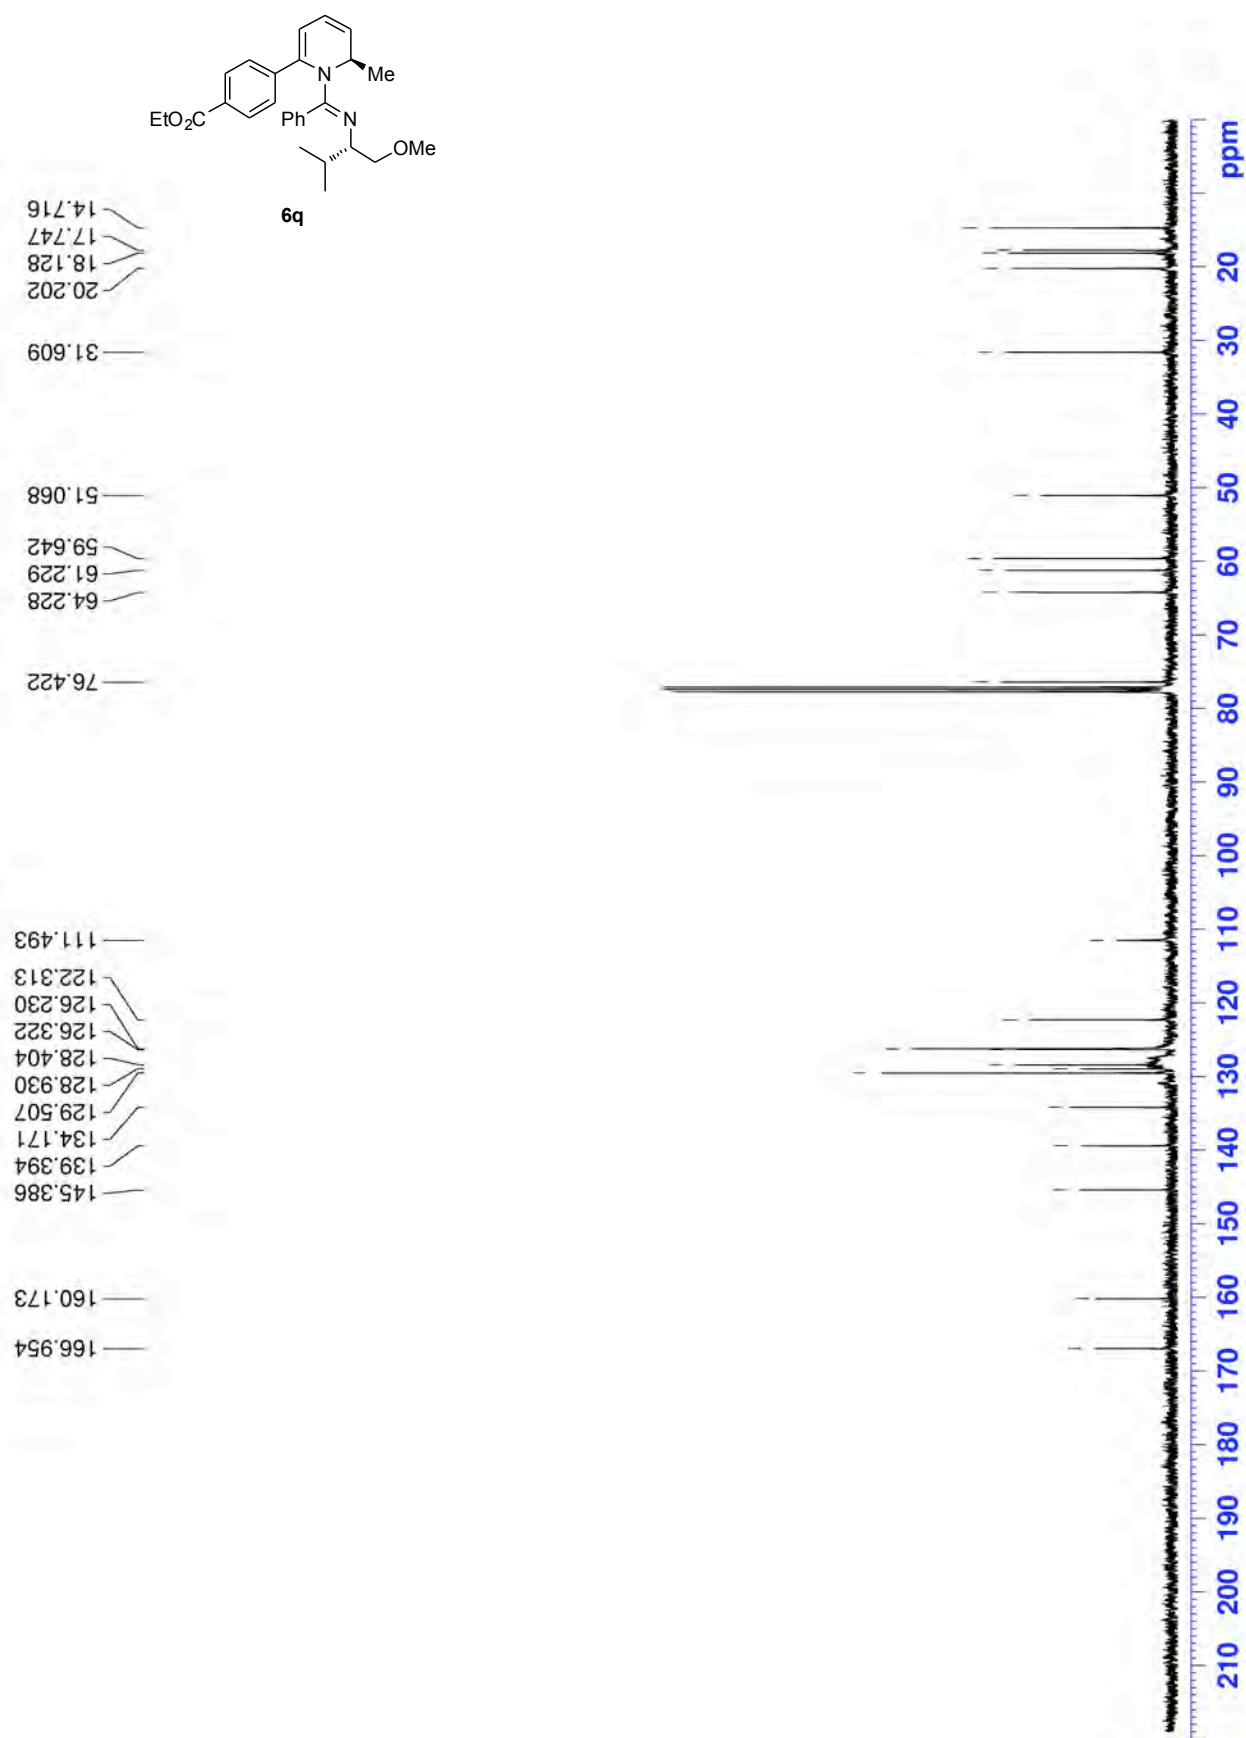



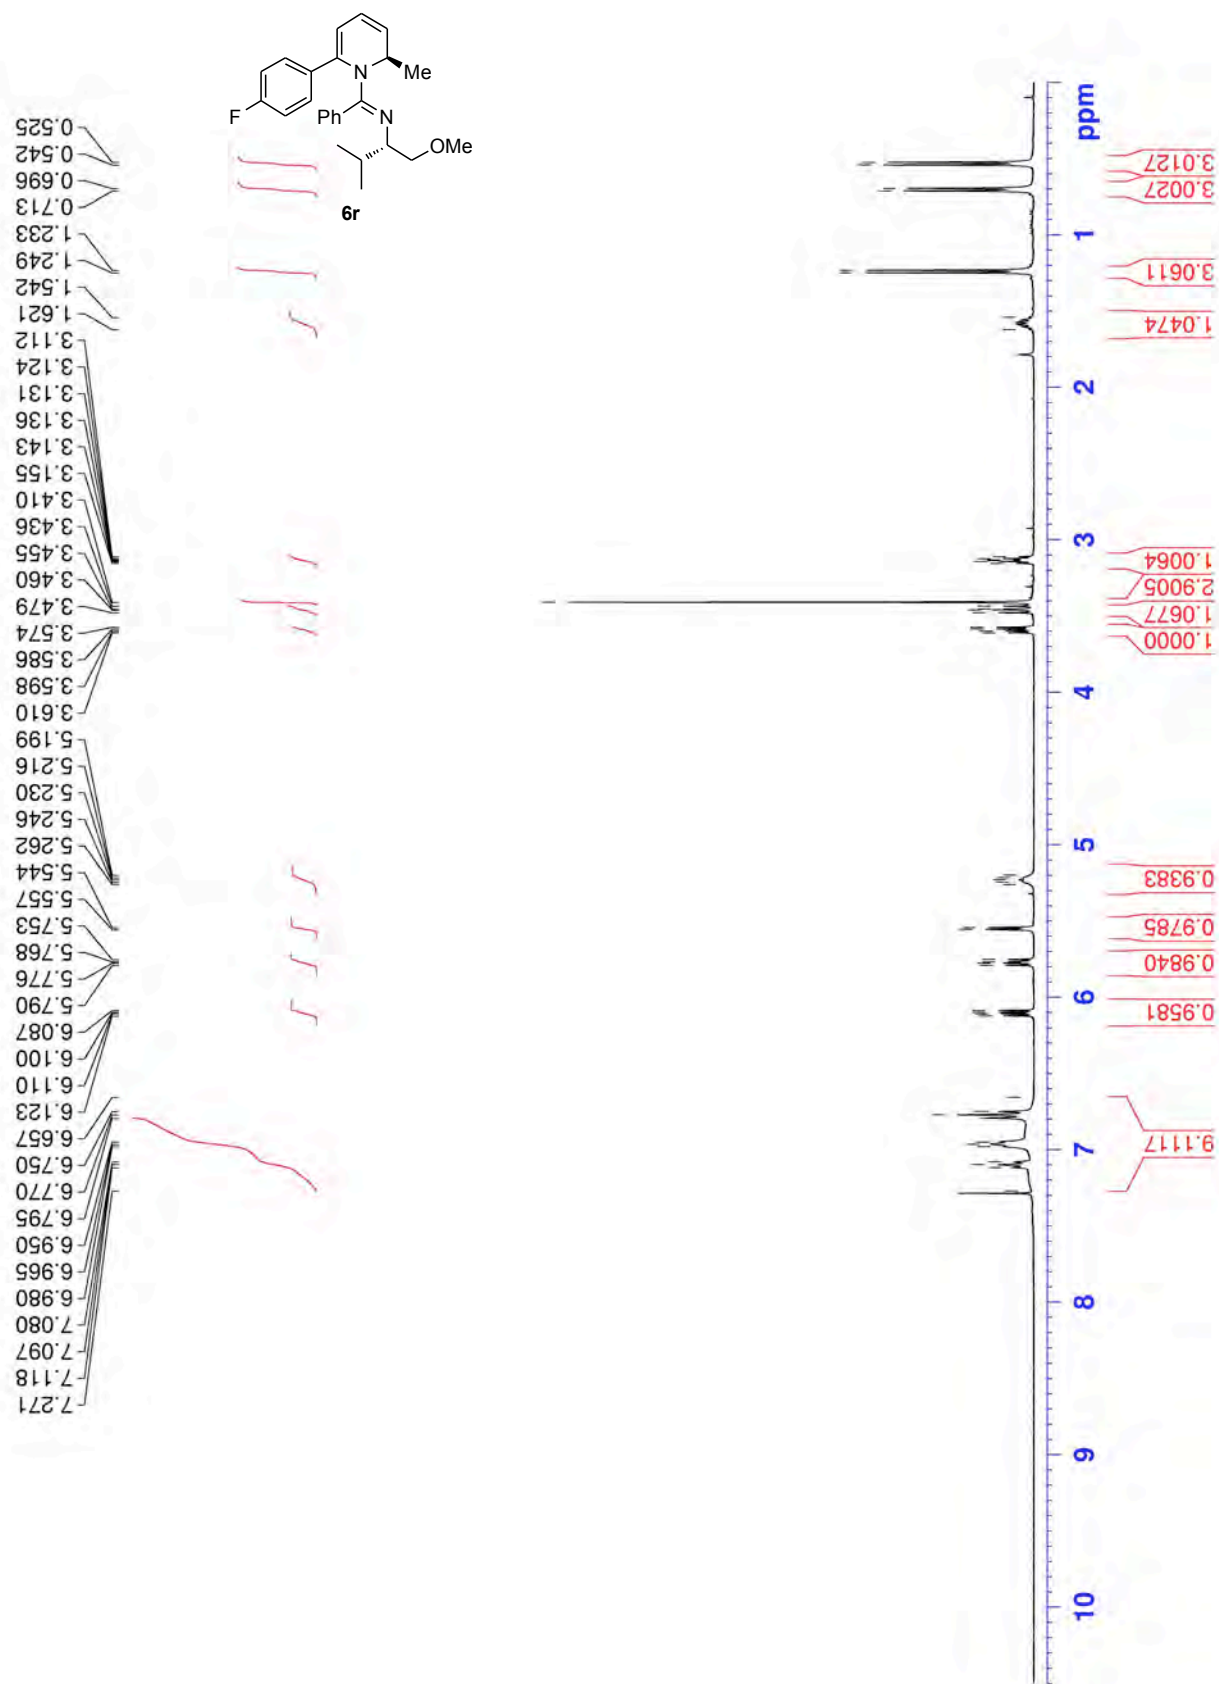

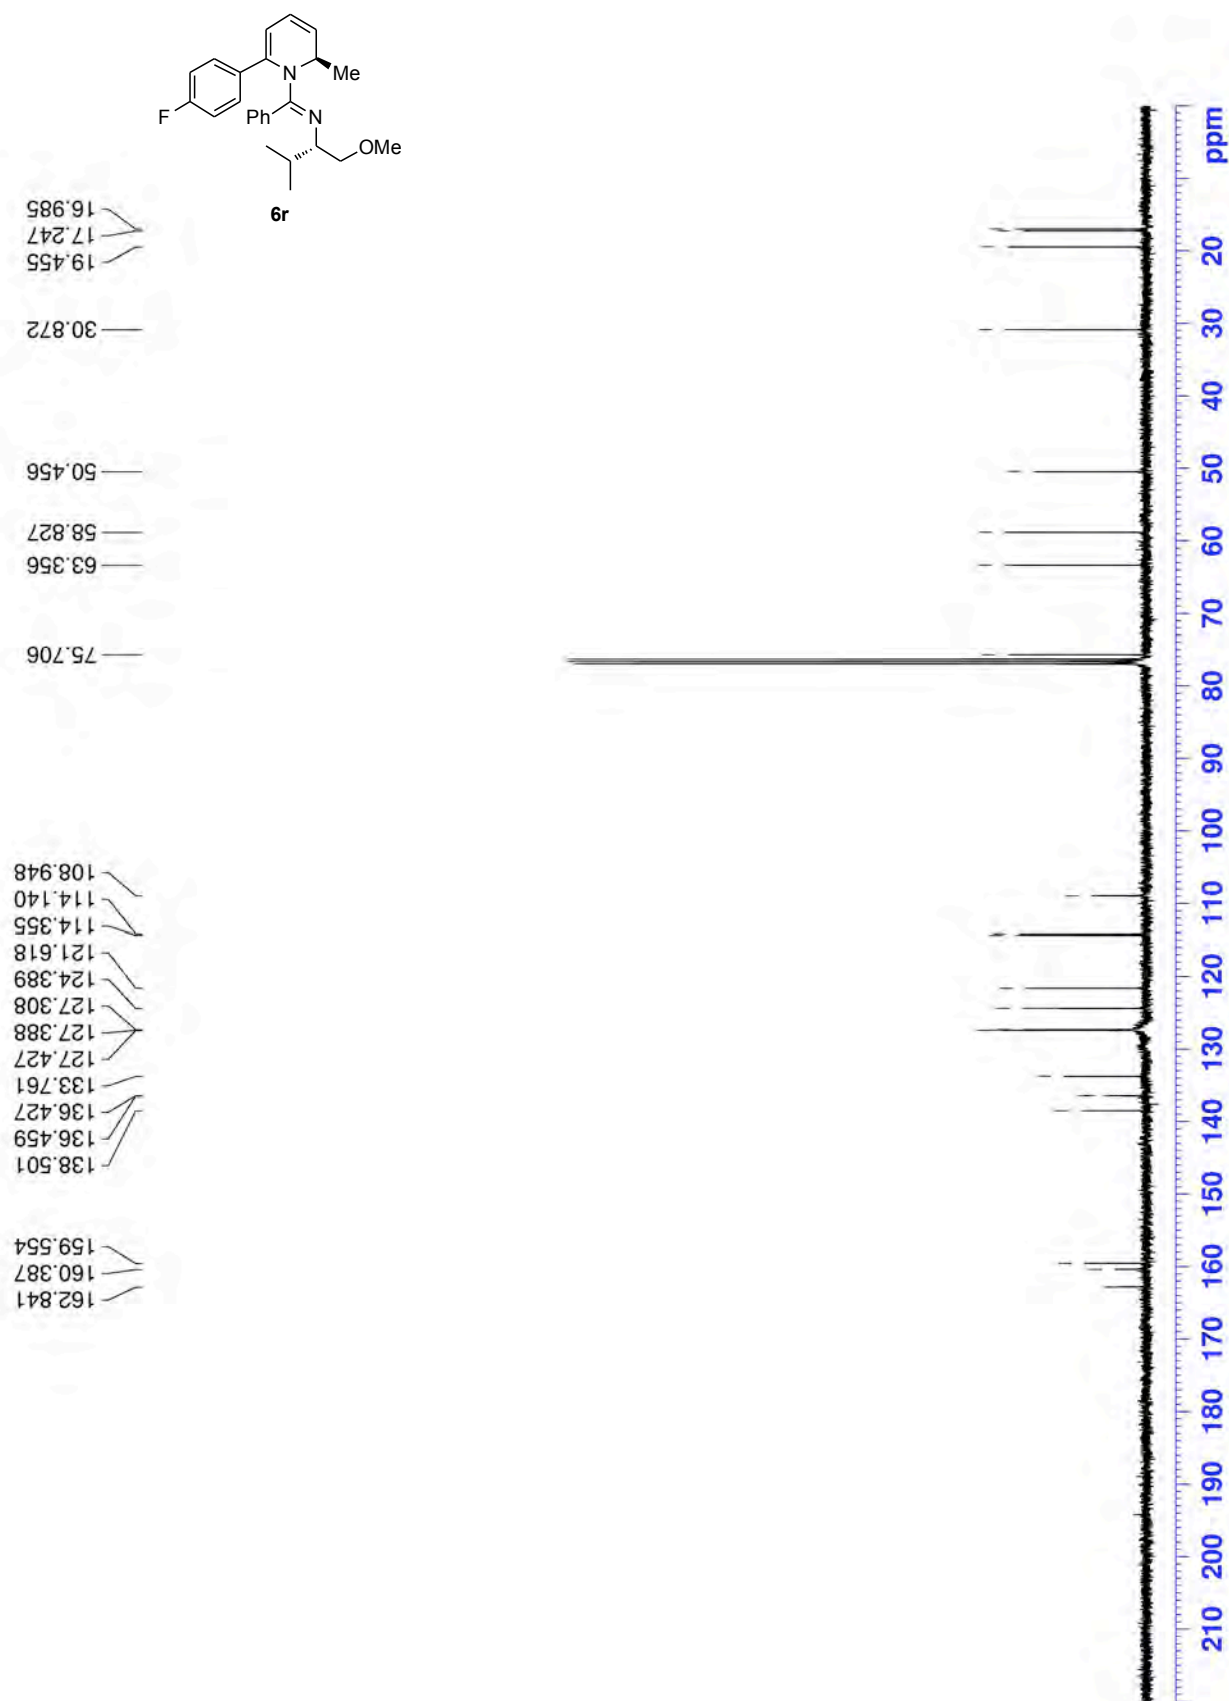

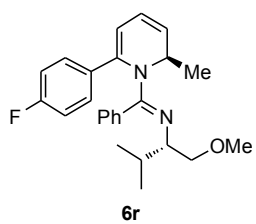

-115.869

ppm

-120

-100

-80

-60

-40

-20

0

20

40

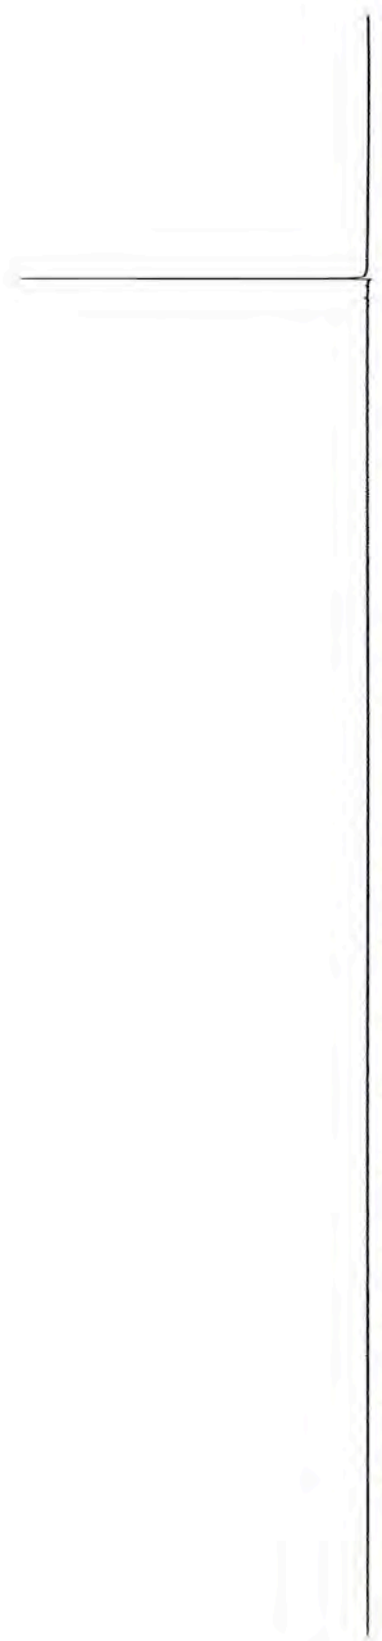

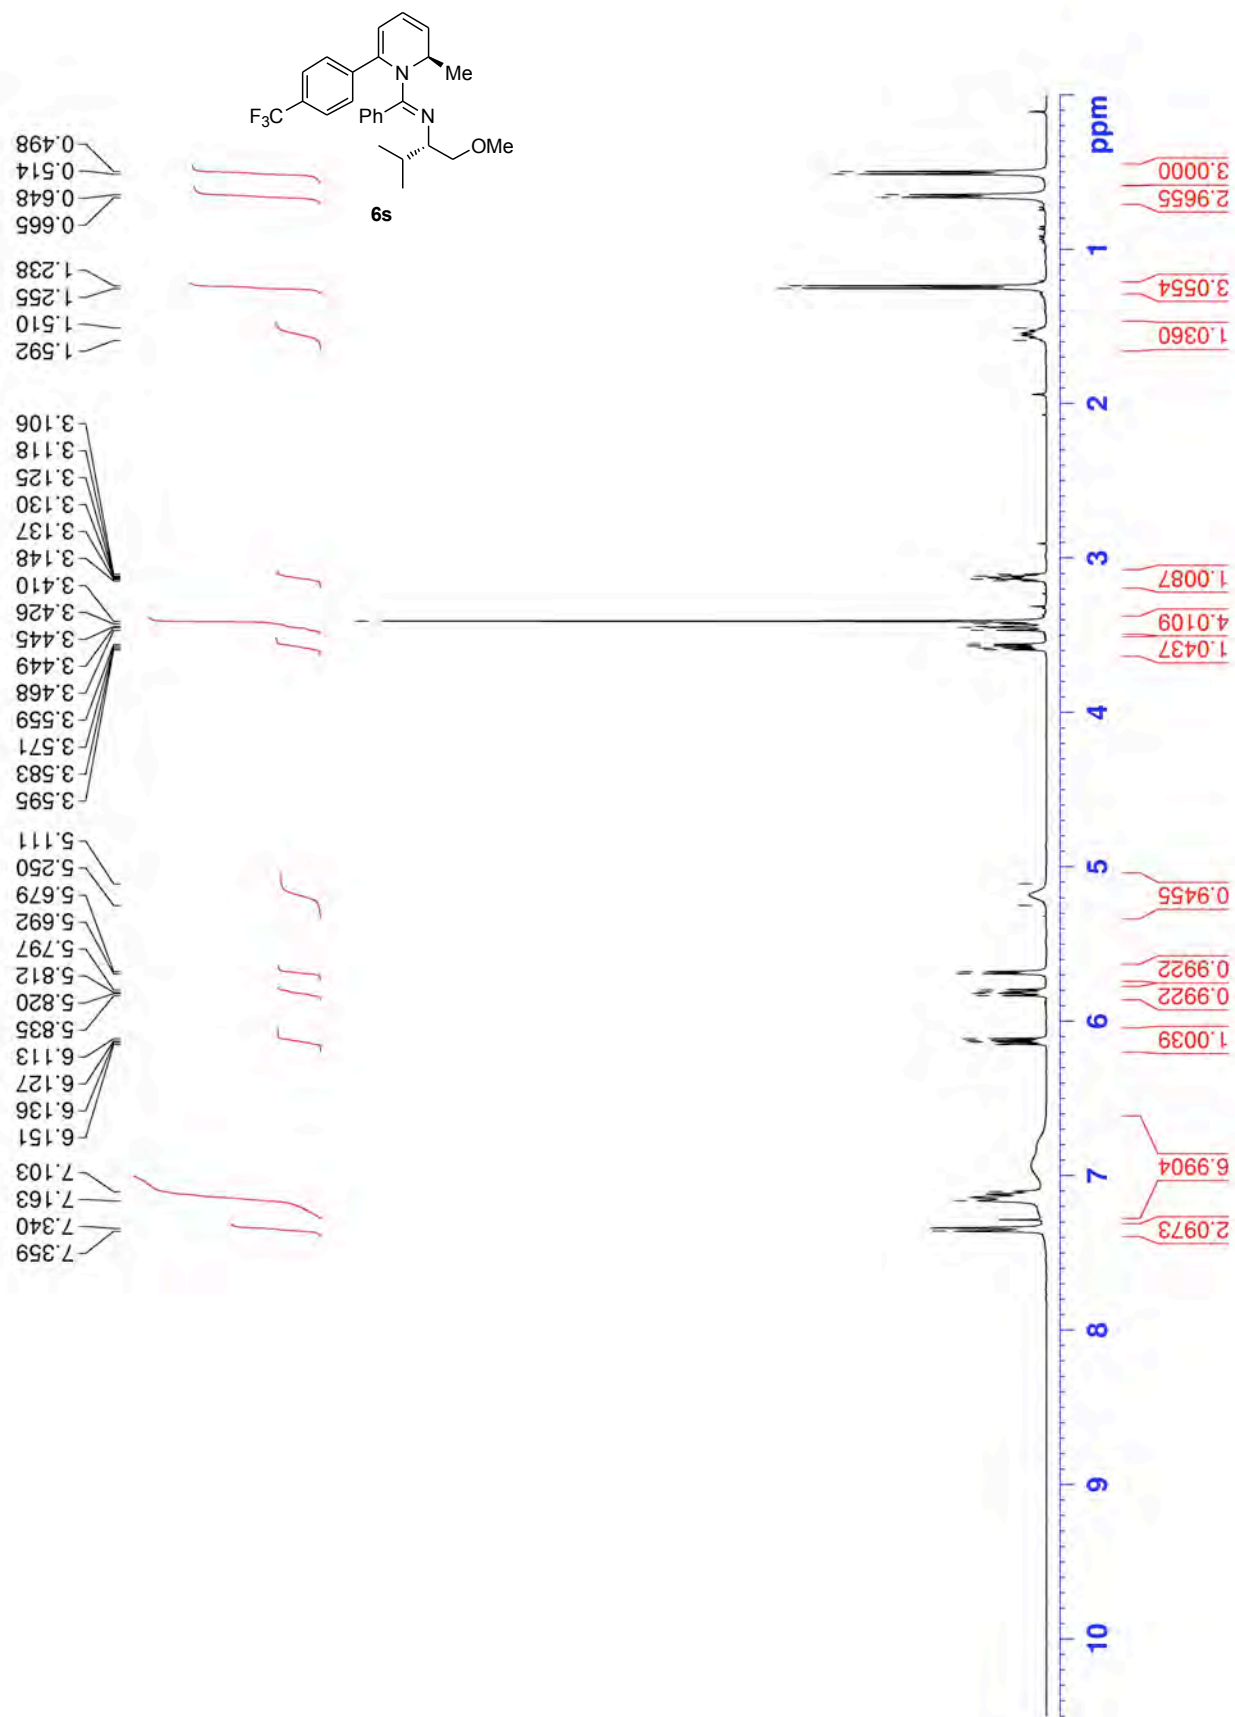

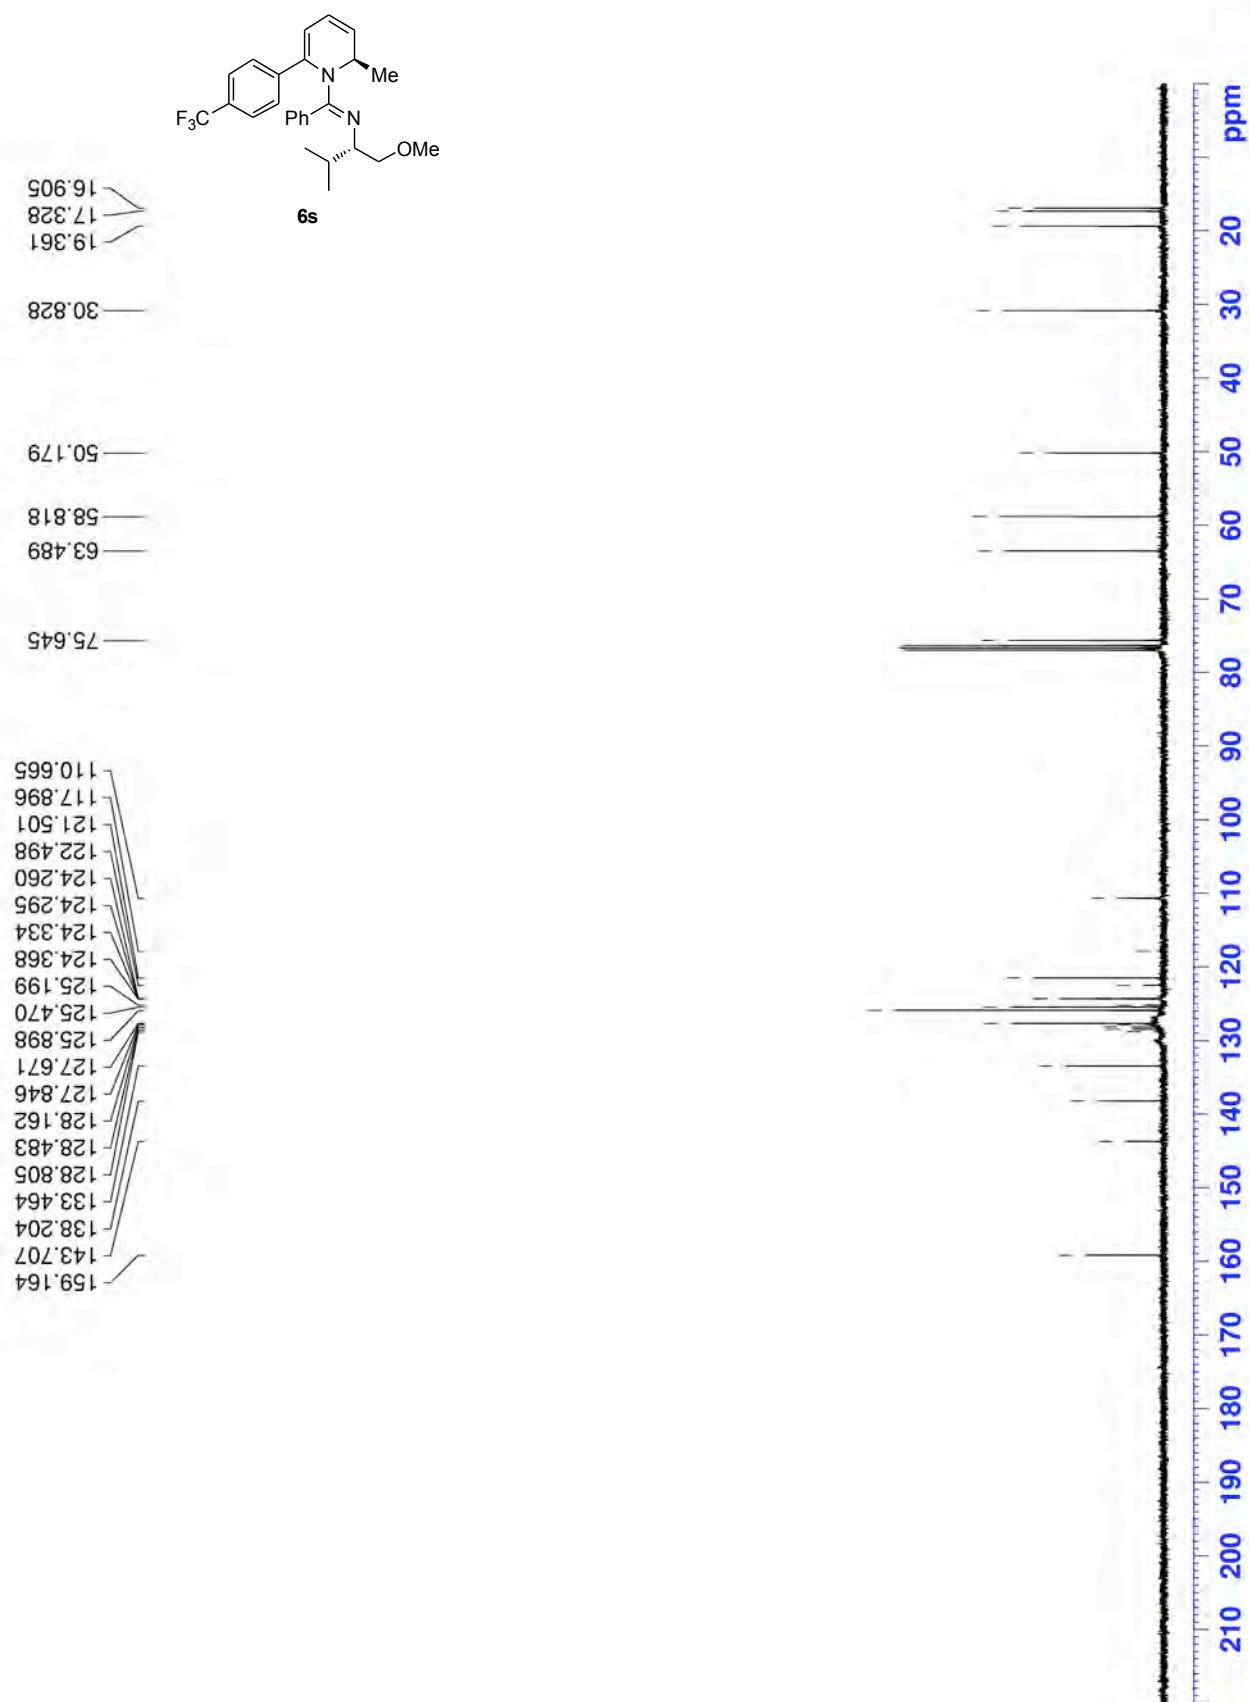

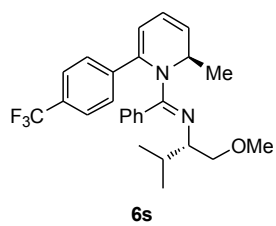

-62.889

ppm  
-140  
-120  
-100  
-80  
-60  
-40  
-20  
0  
20  
40

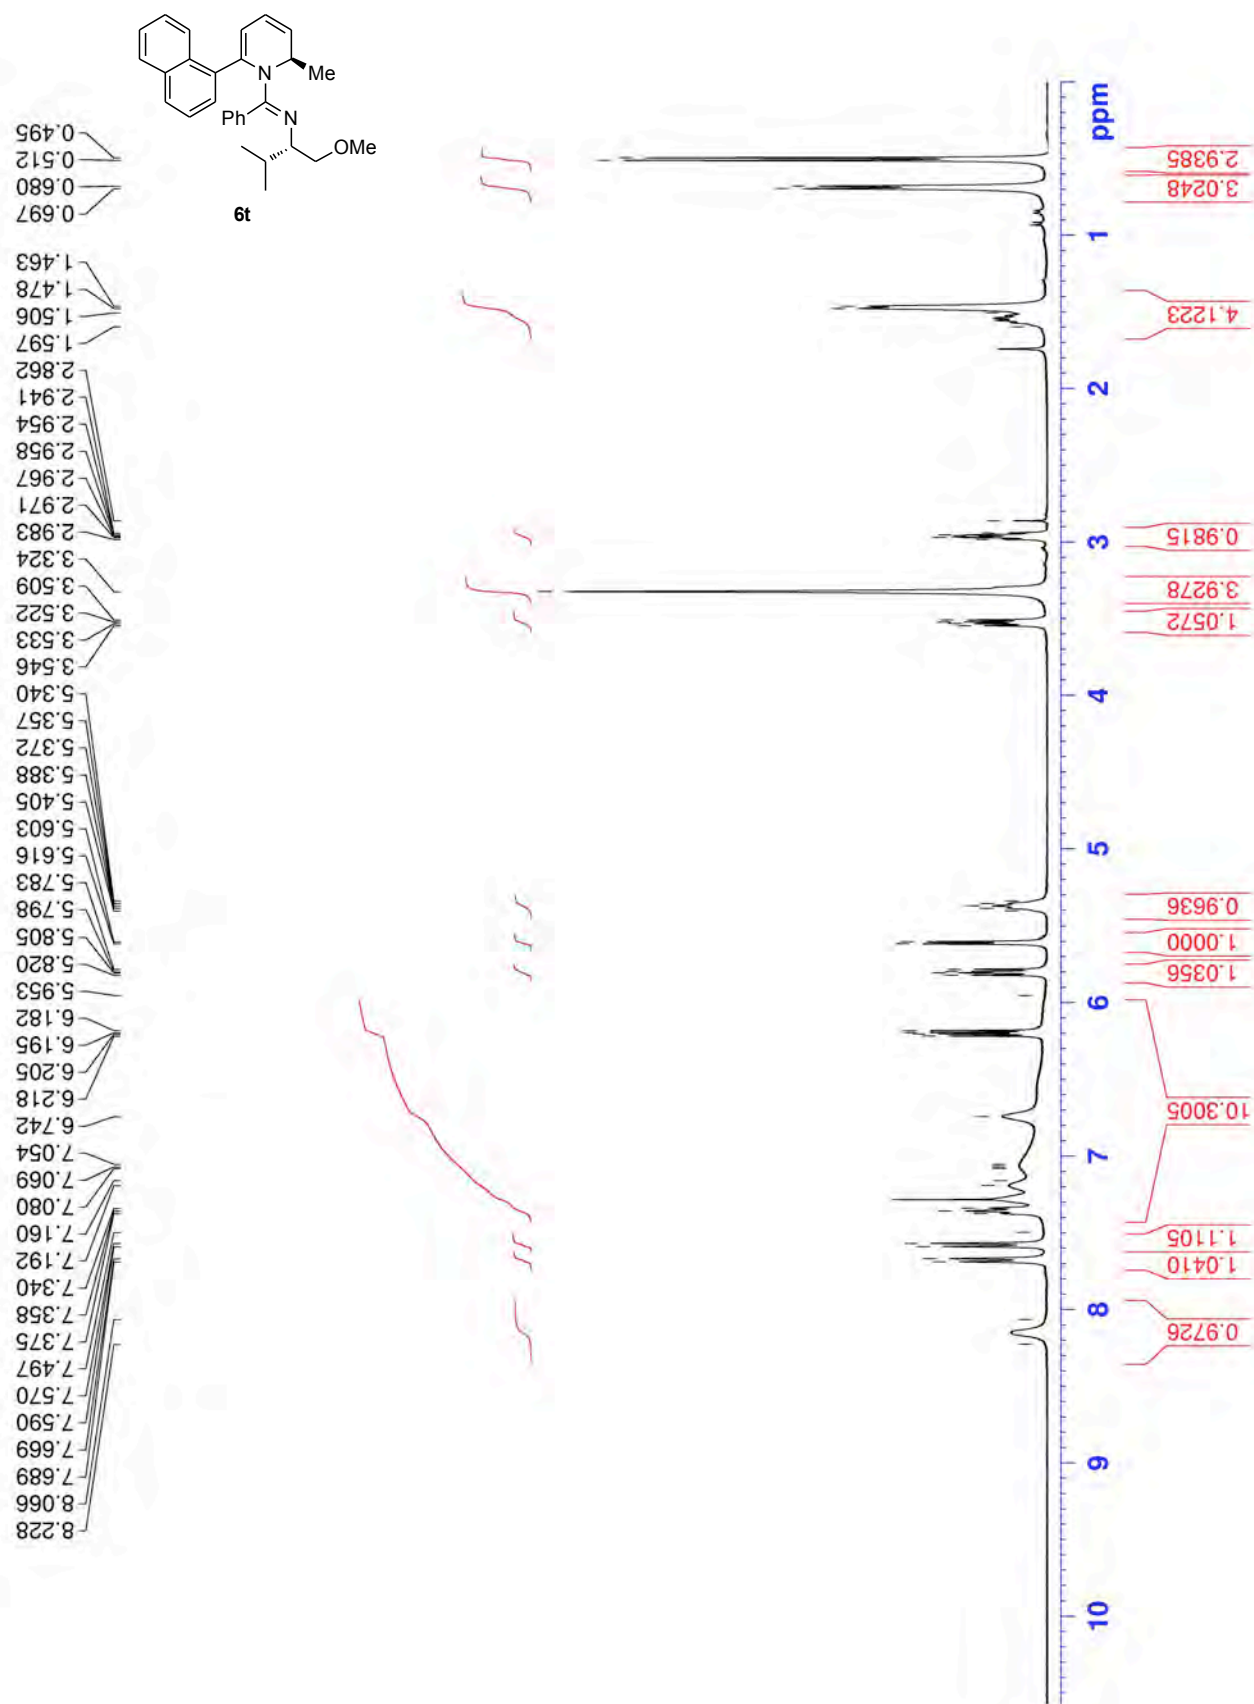

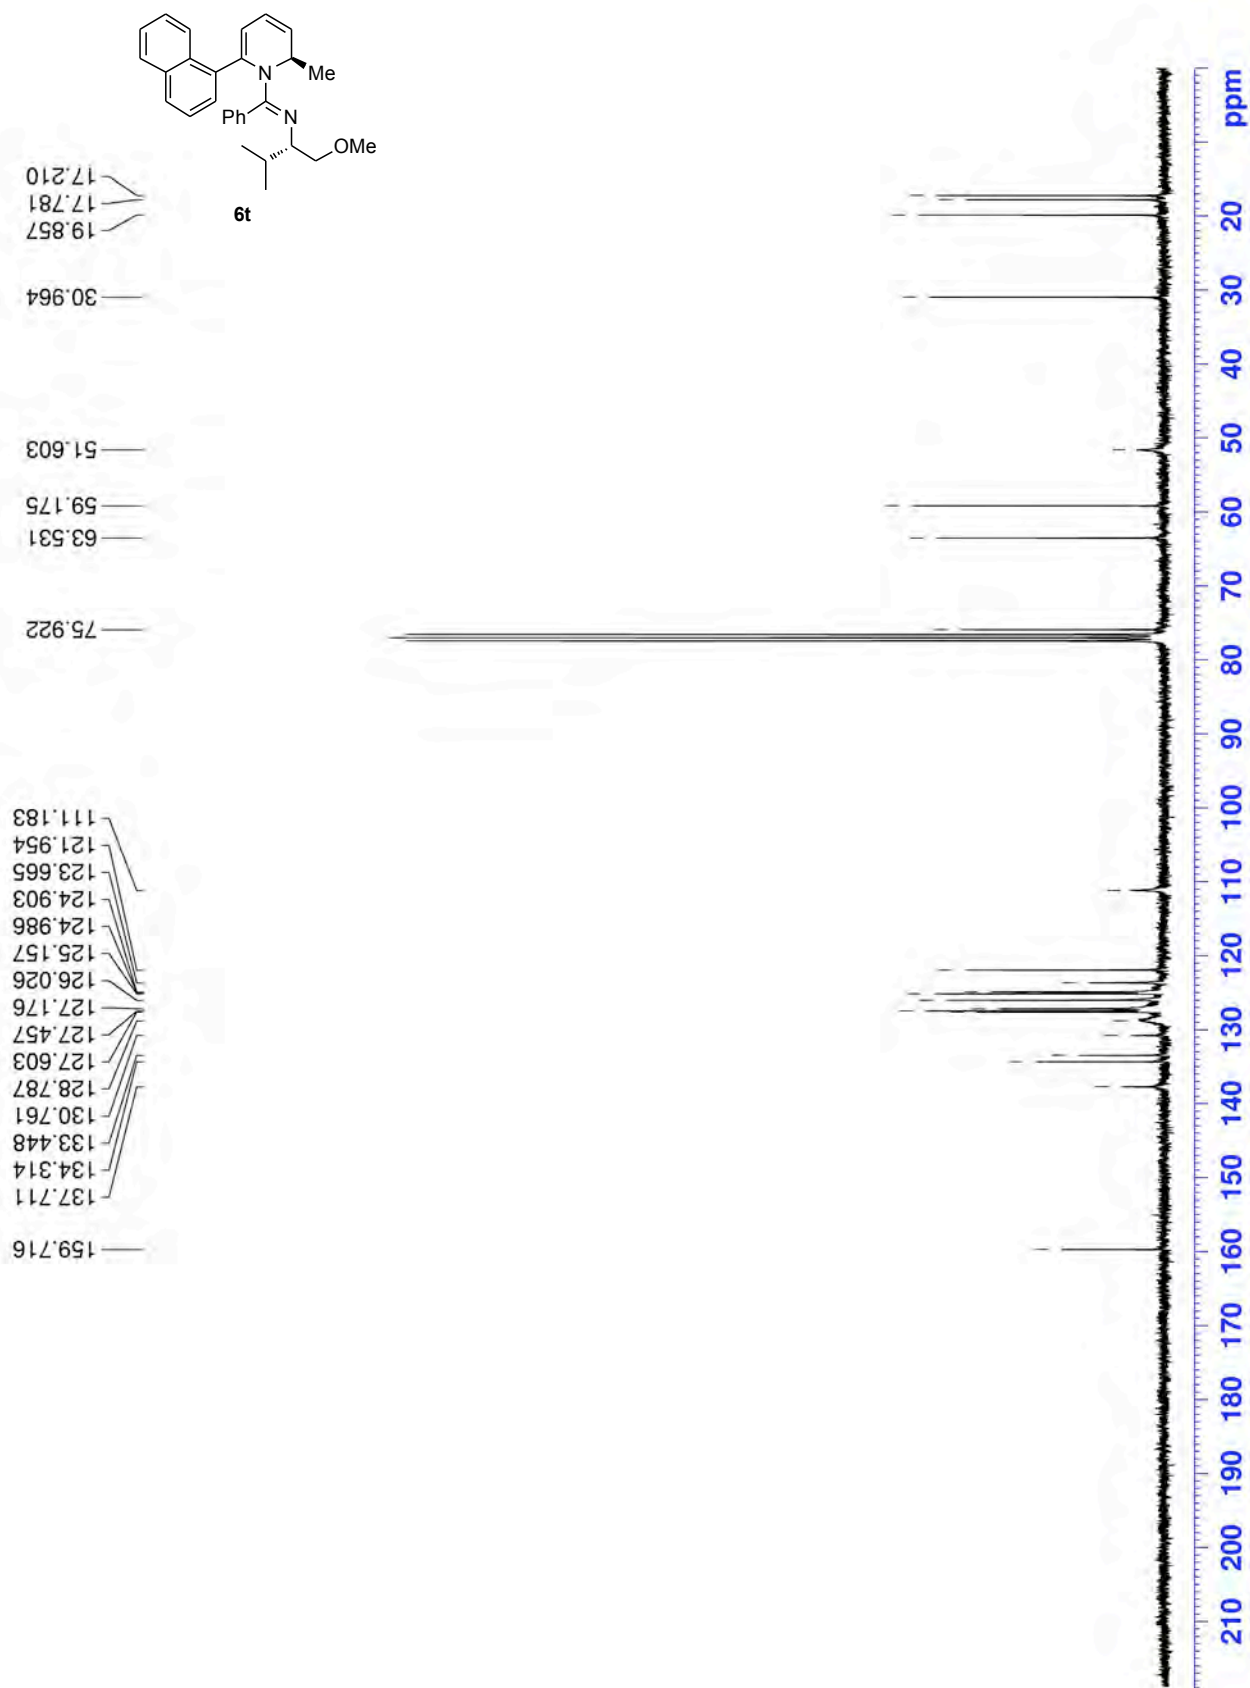



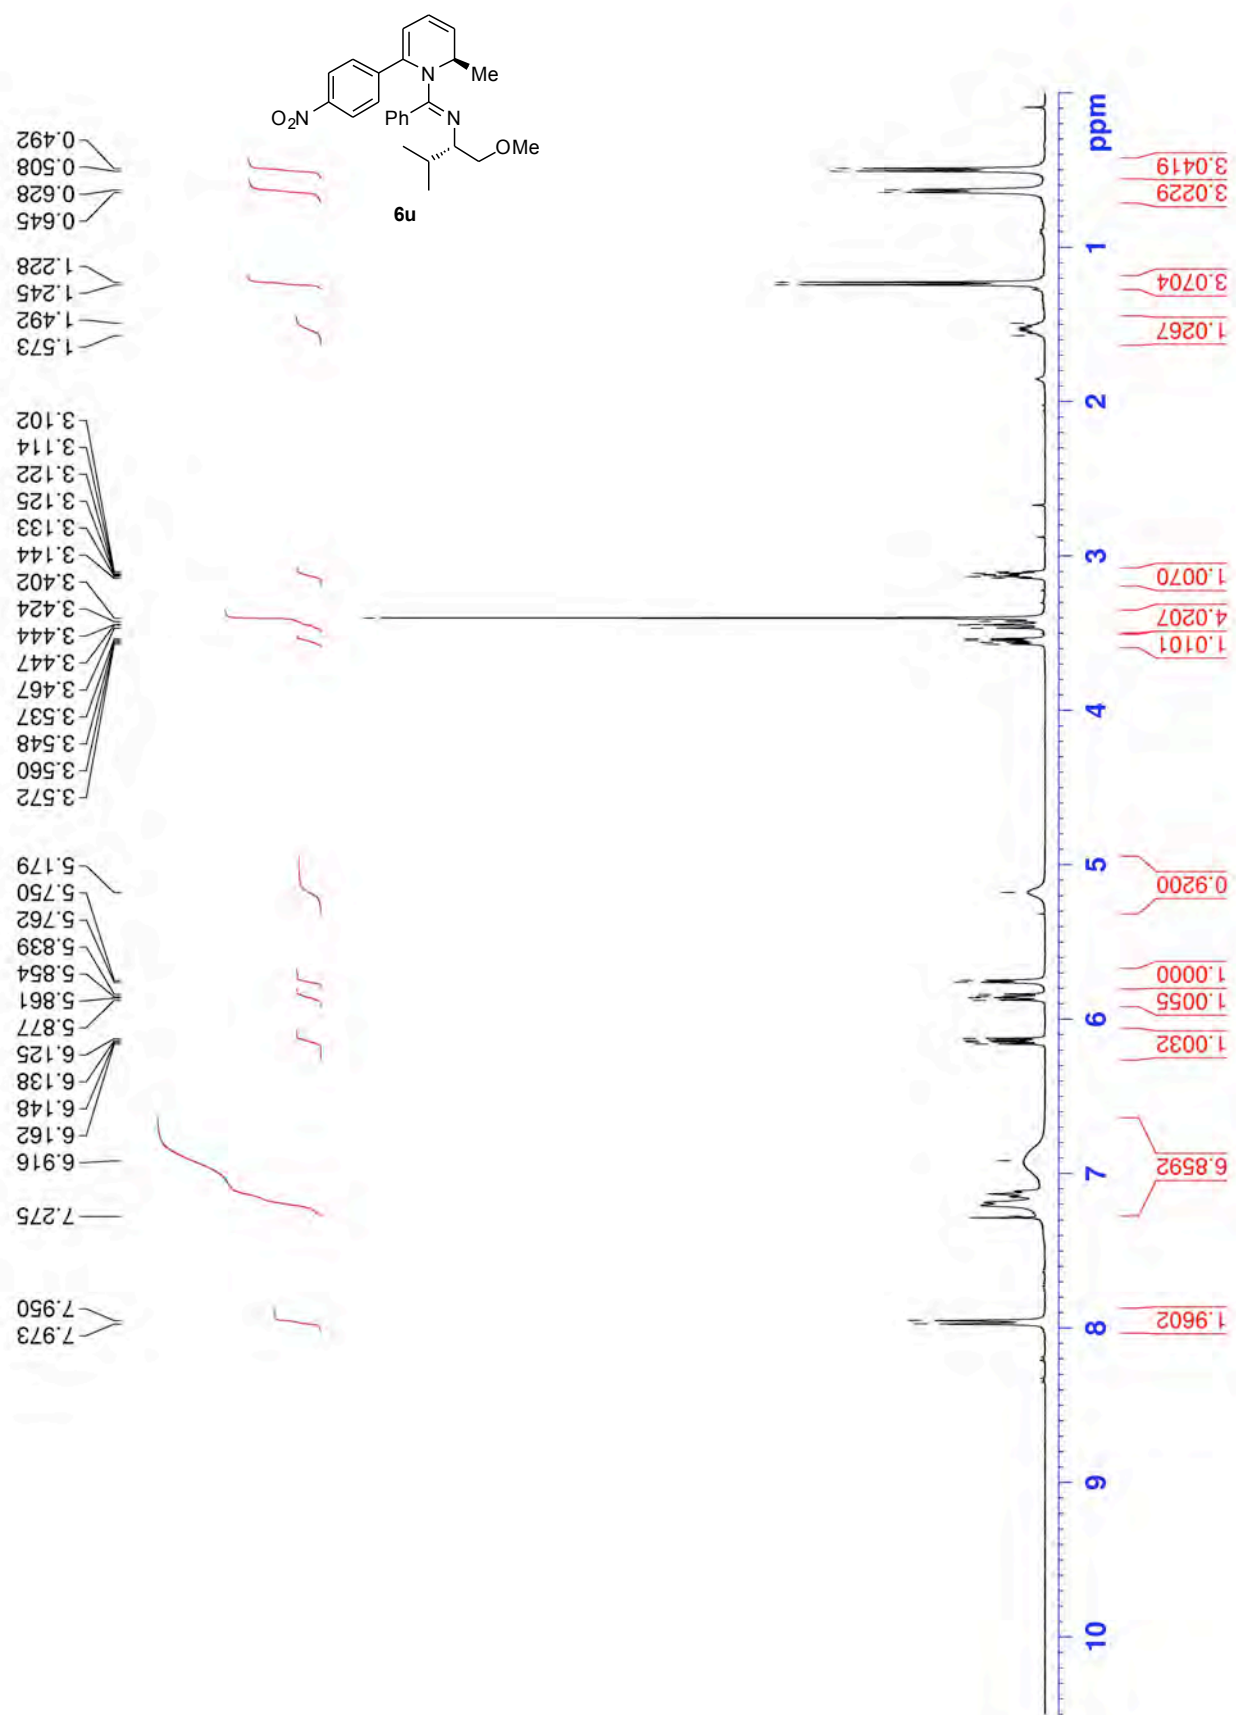

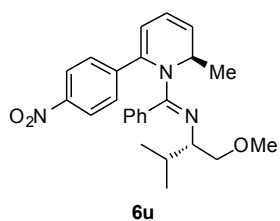

18.242  
18.668  
20.581

32.083

51.463

60.042

64.751

76.817

113.295  
122.621  
124.053  
127.313  
127.753  
128.532  
129.156  
131.310  
134.301  
138.766  
147.114  
147.823

160.183

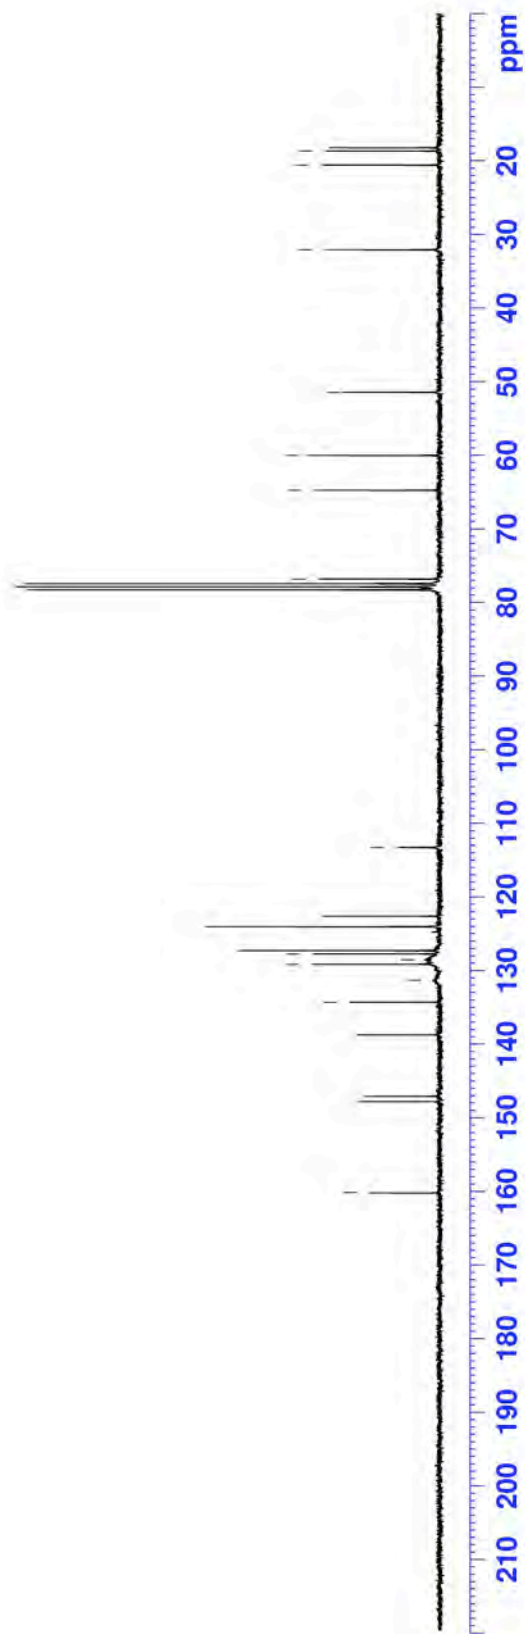

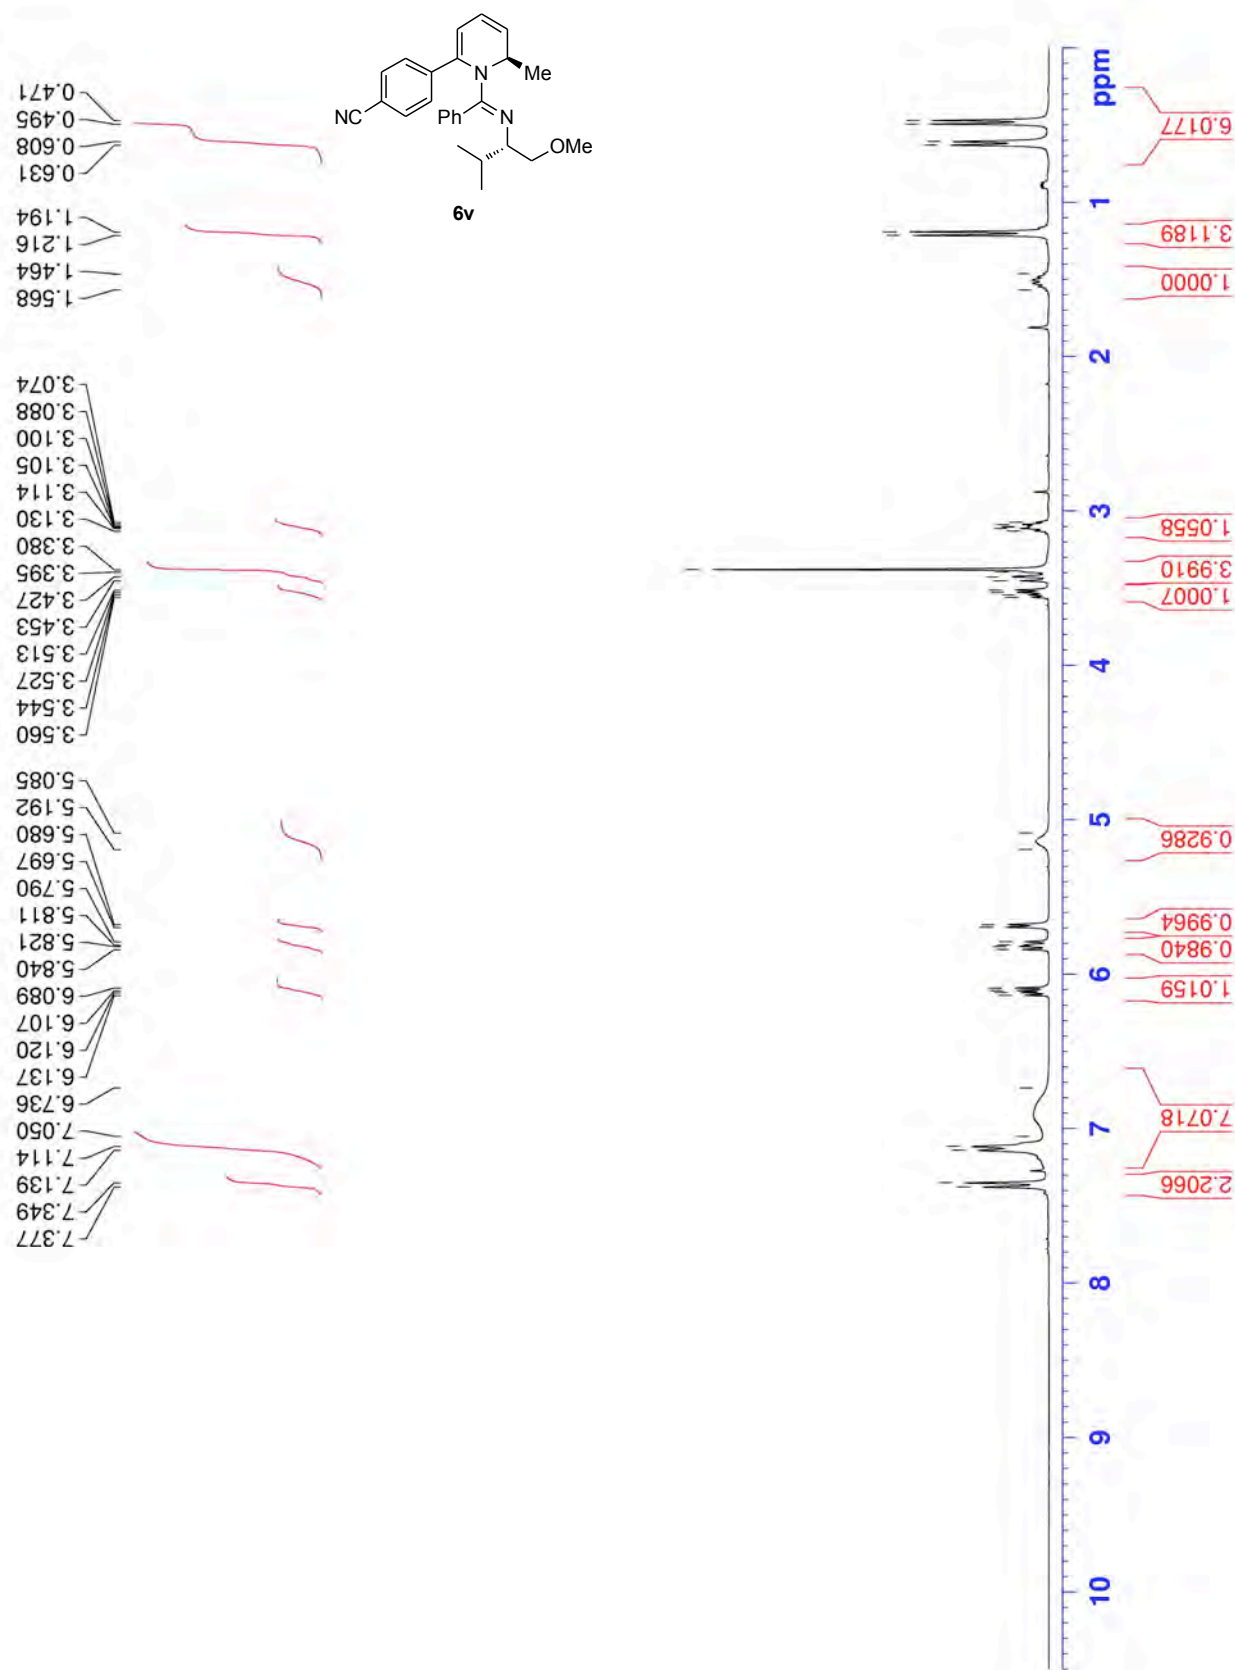

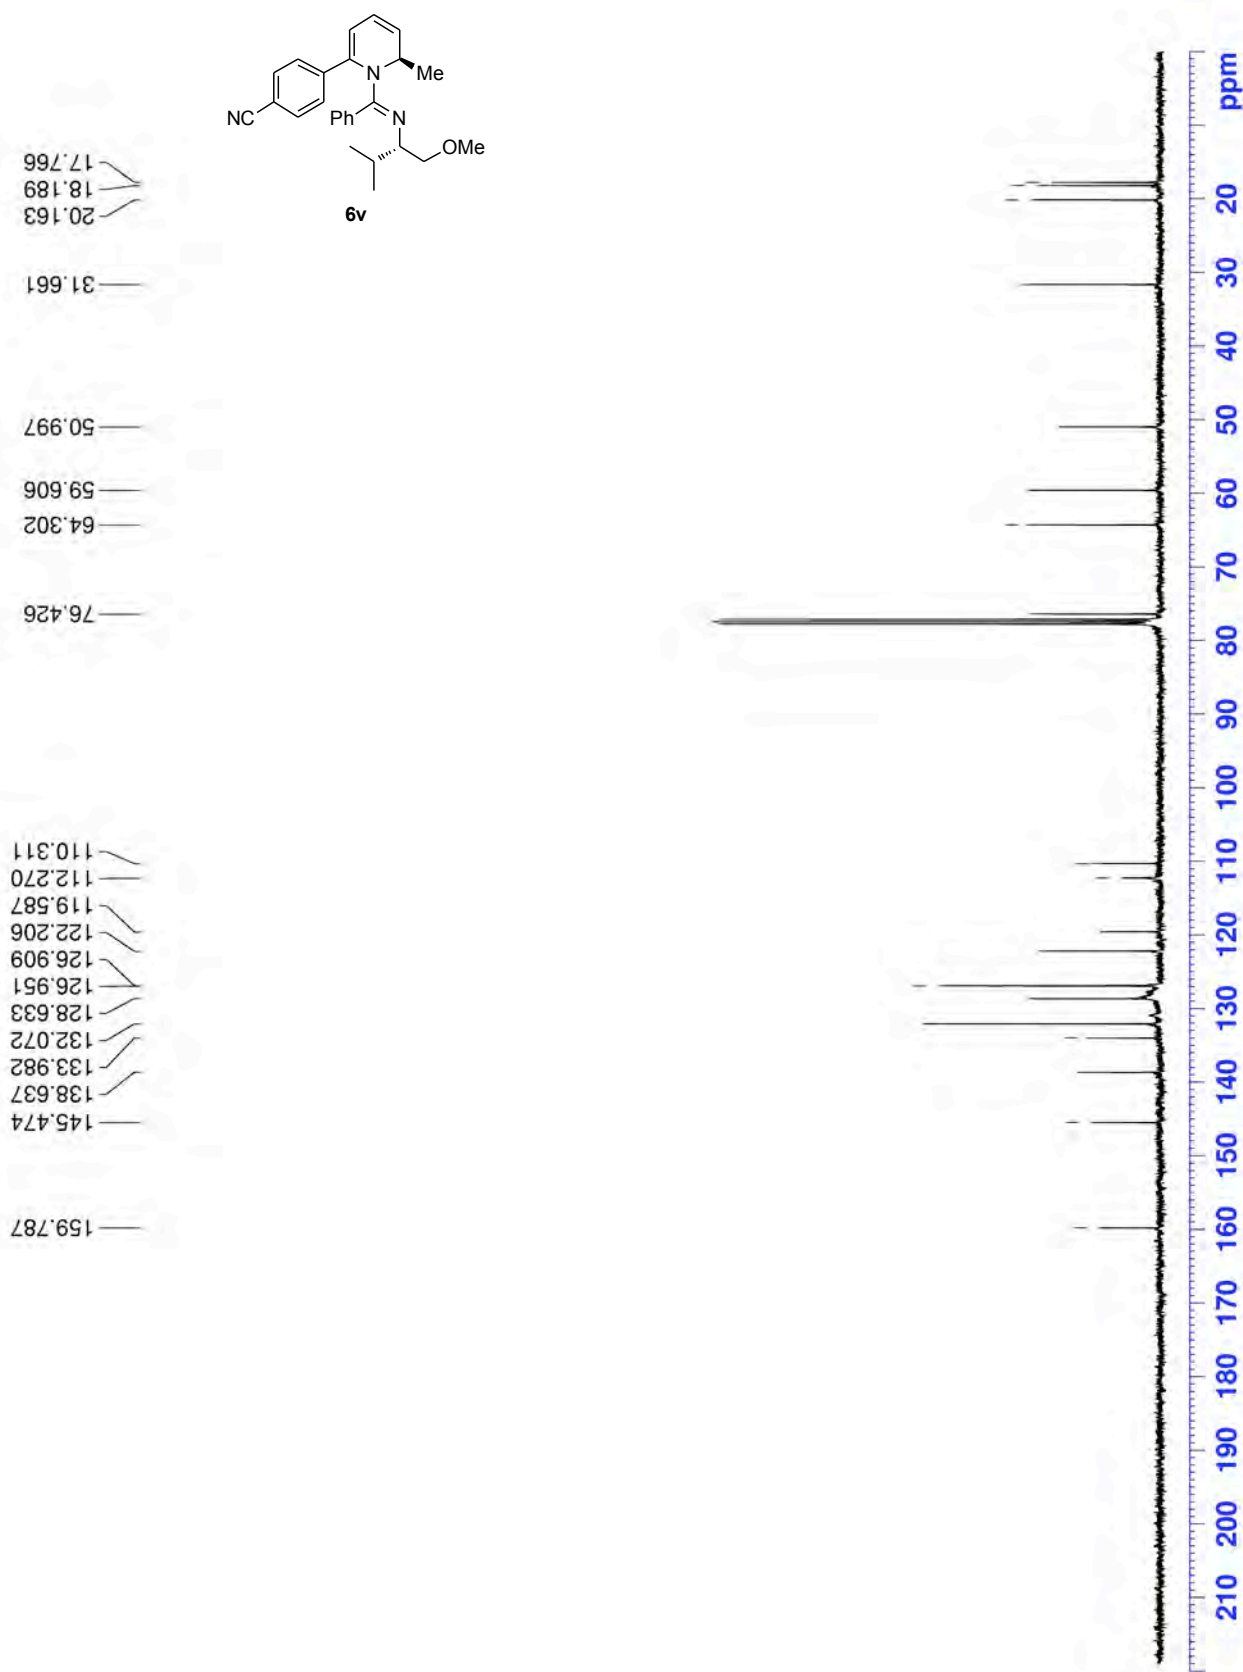

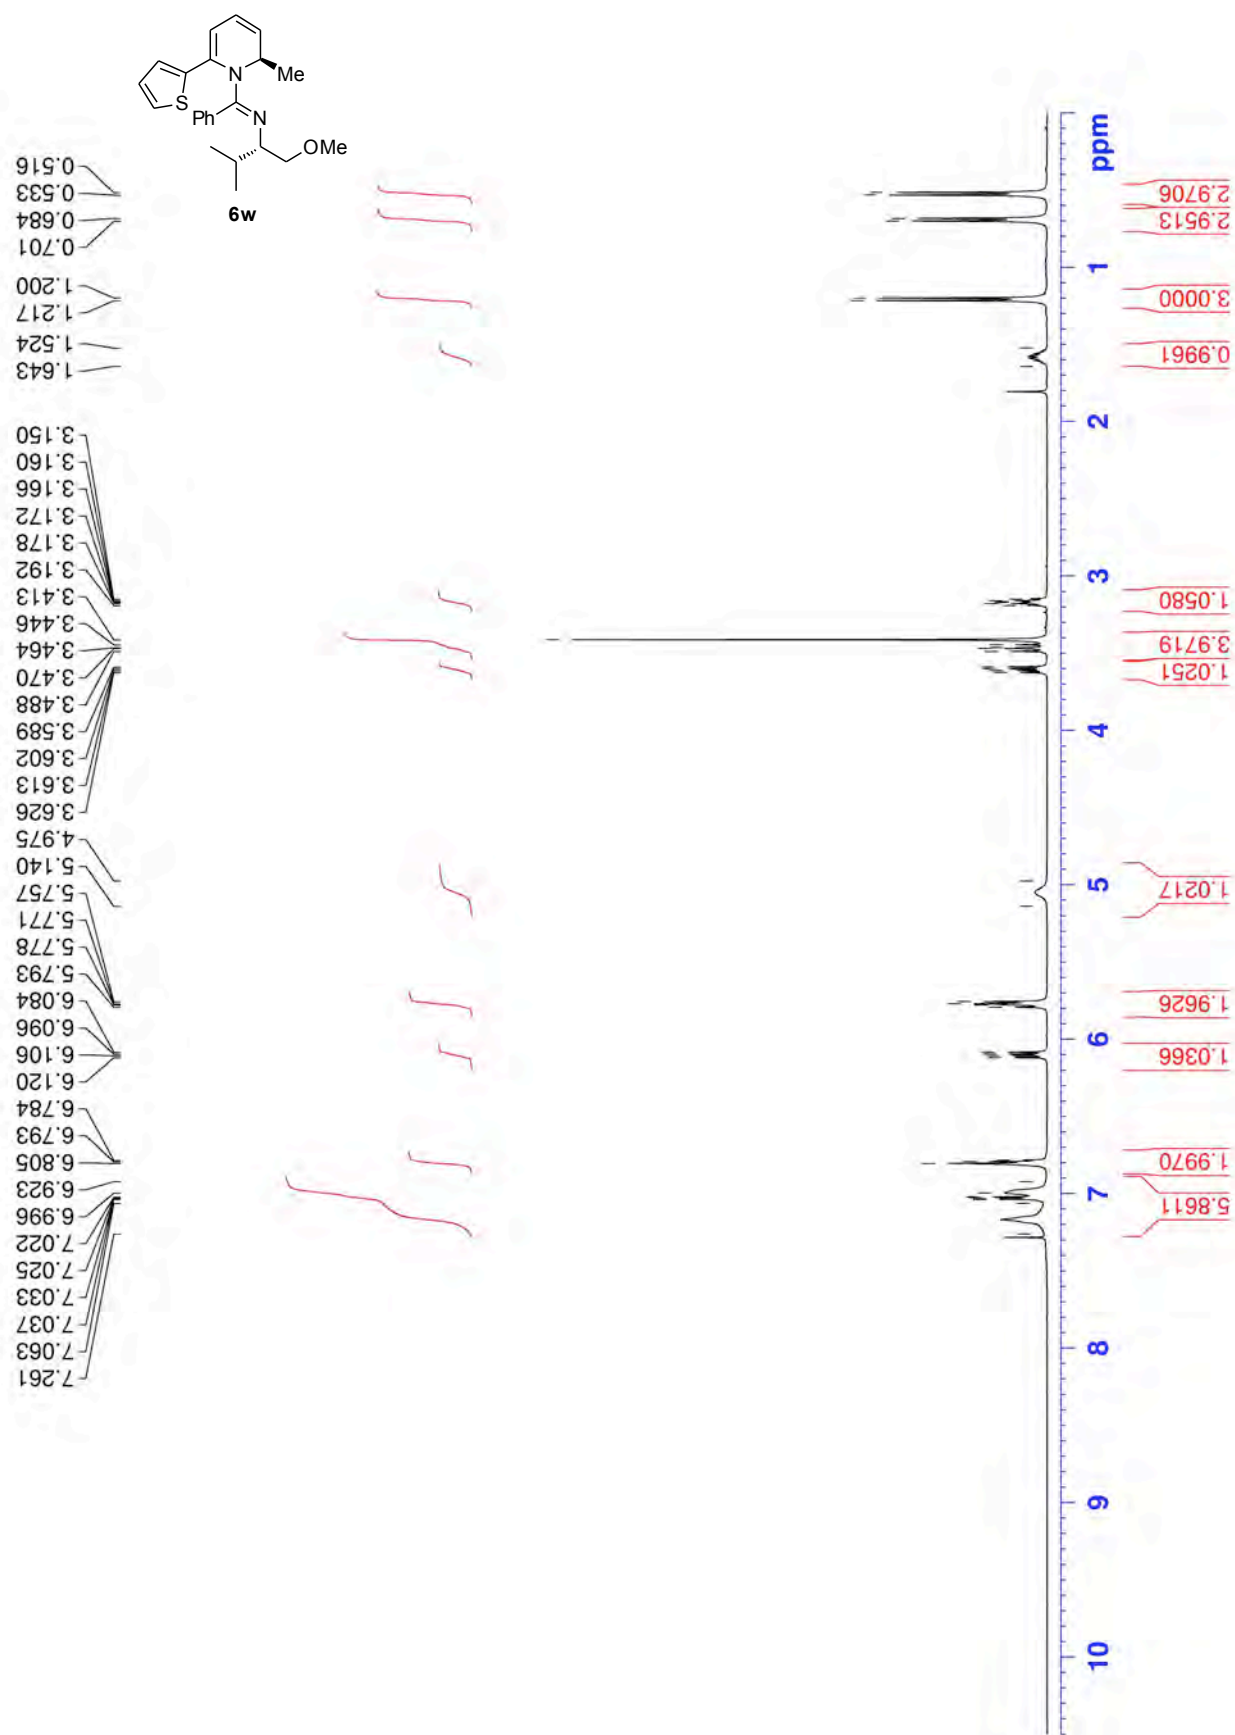

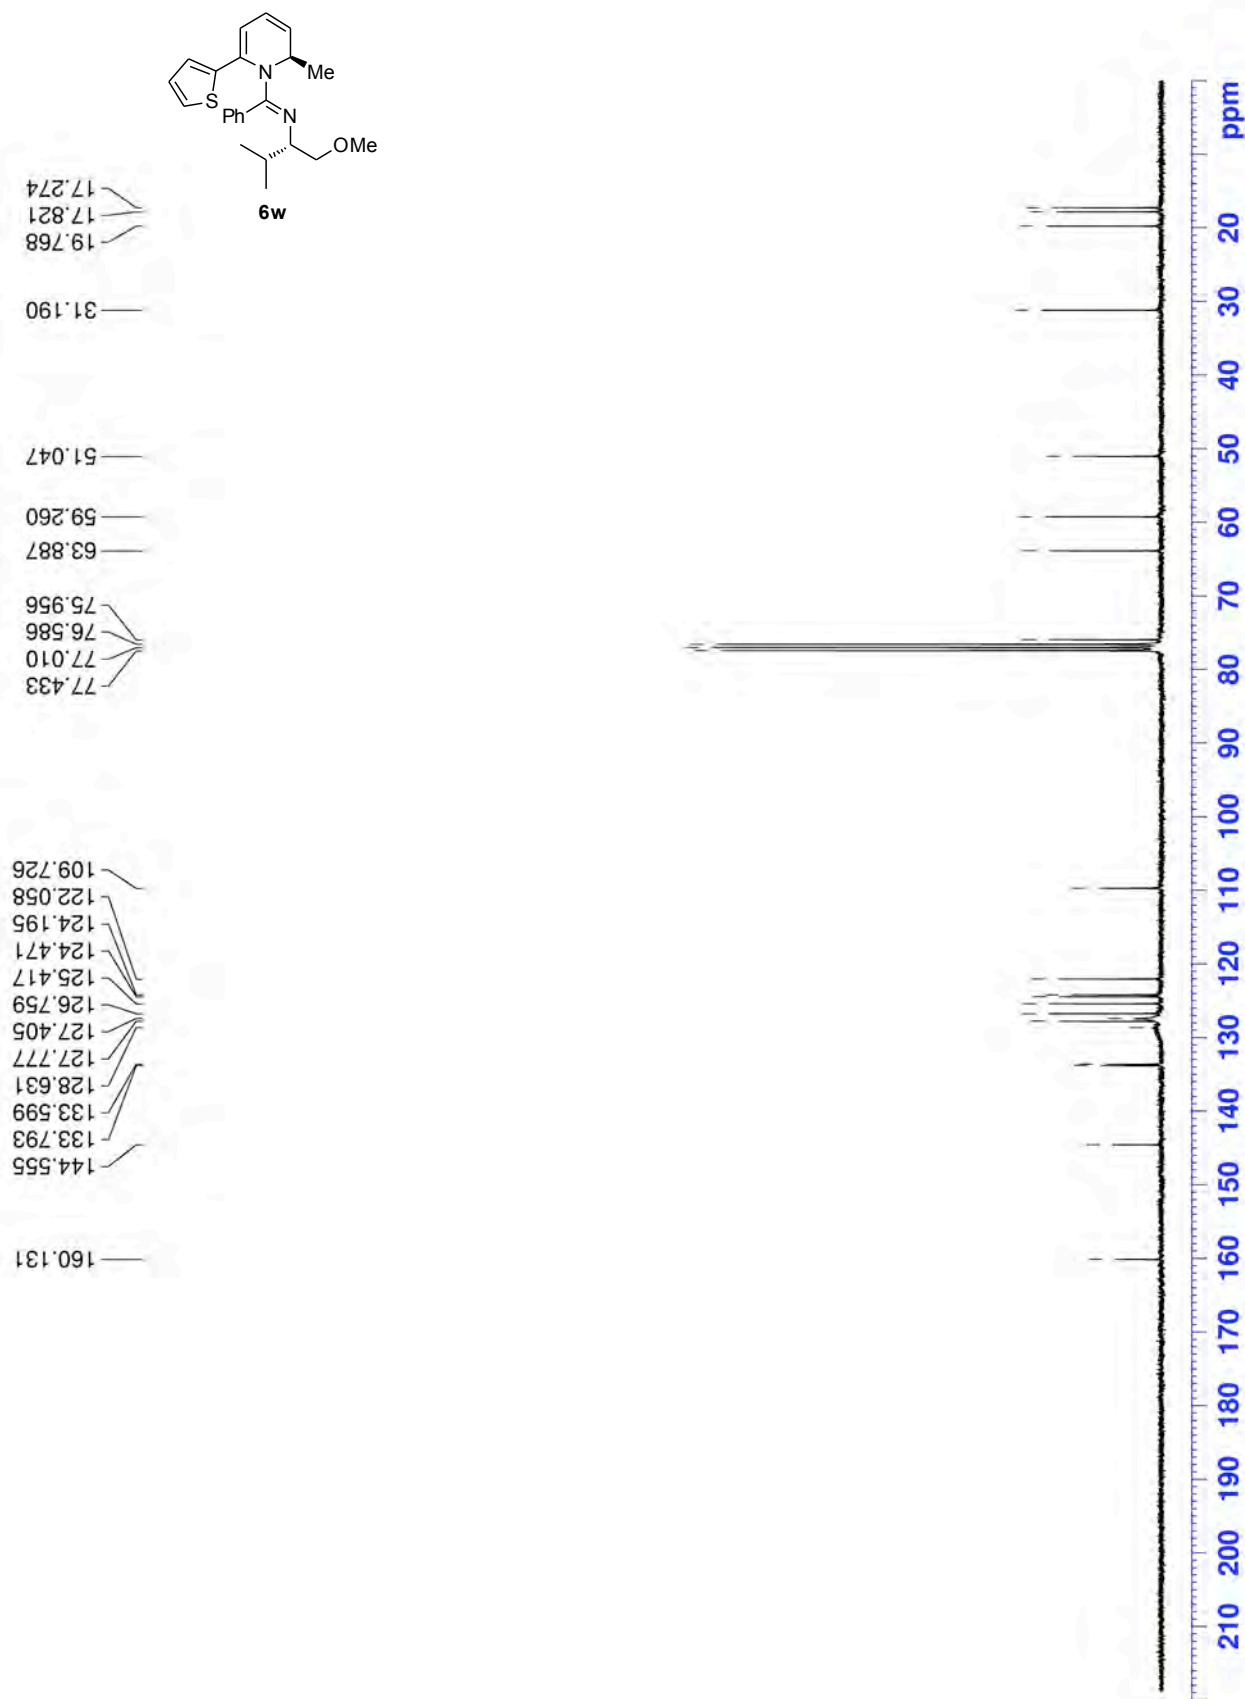

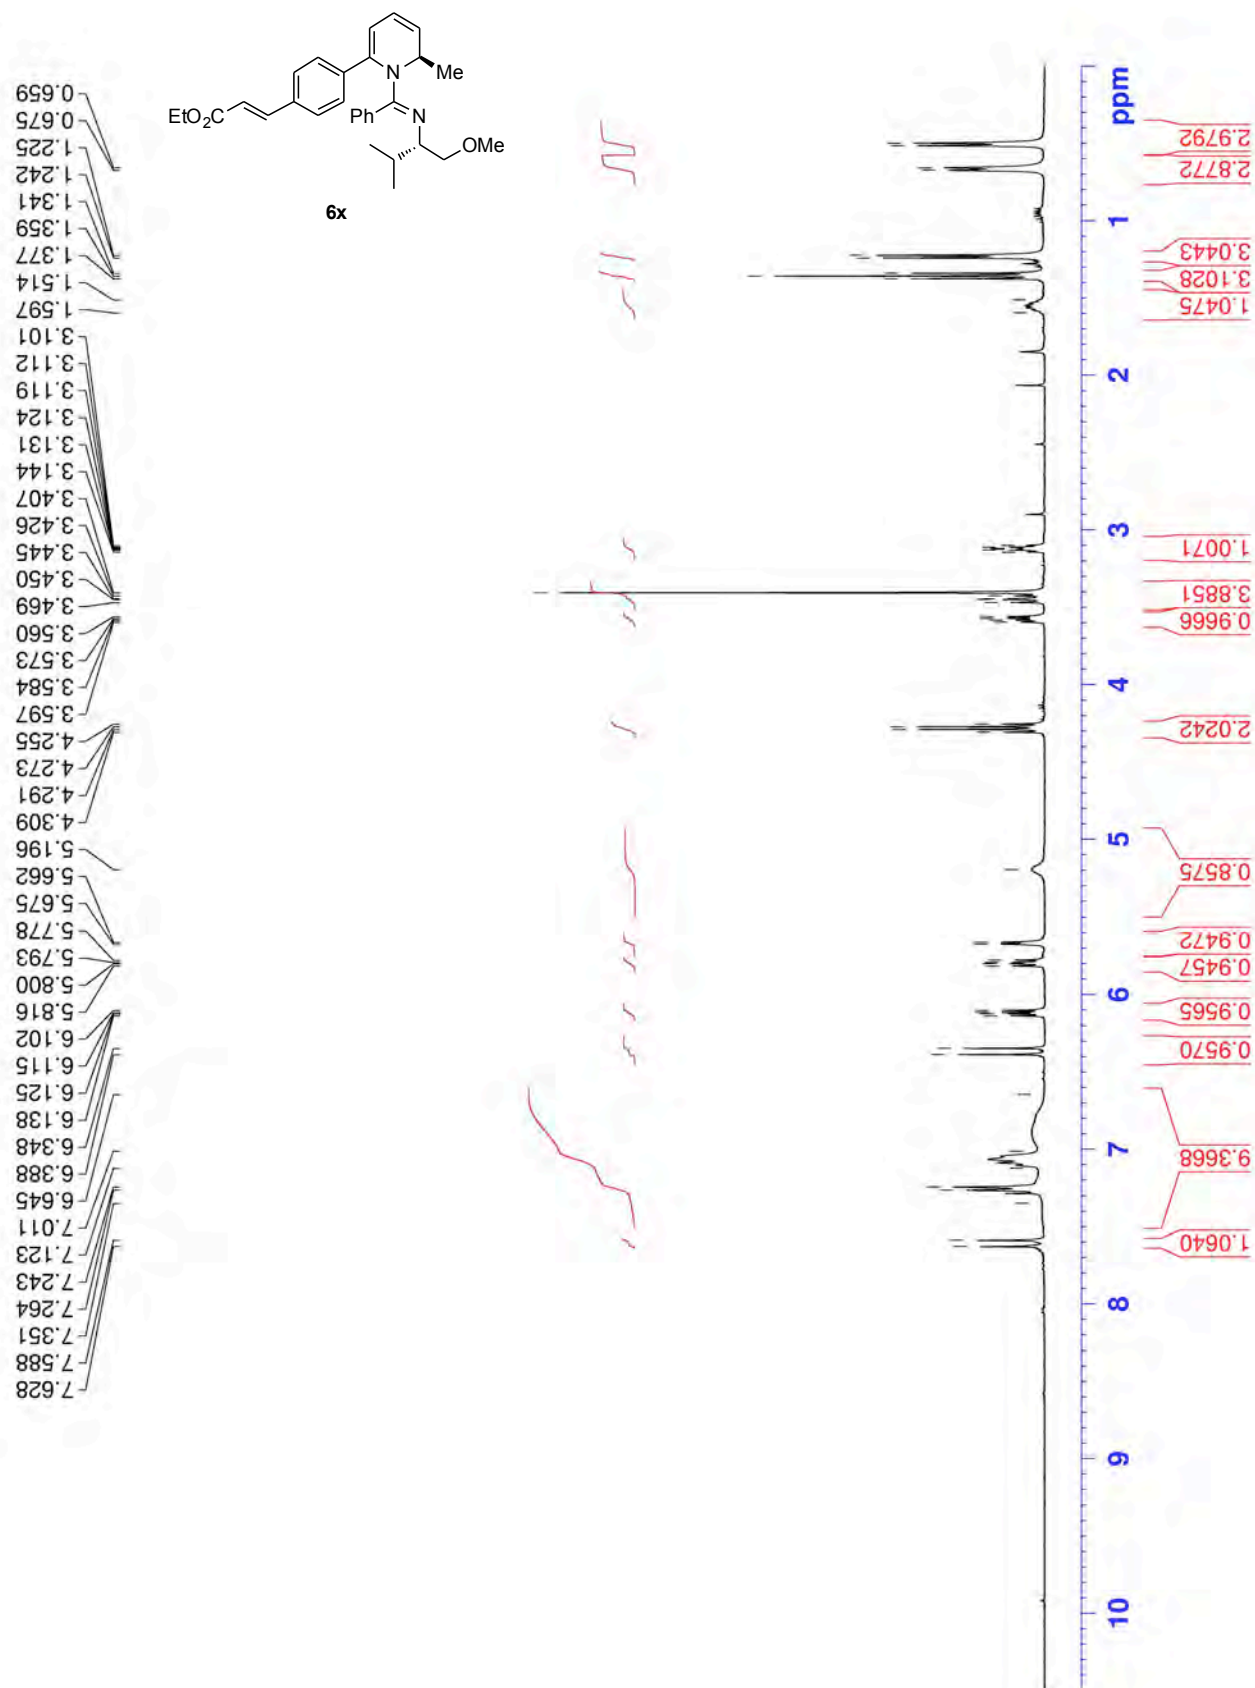

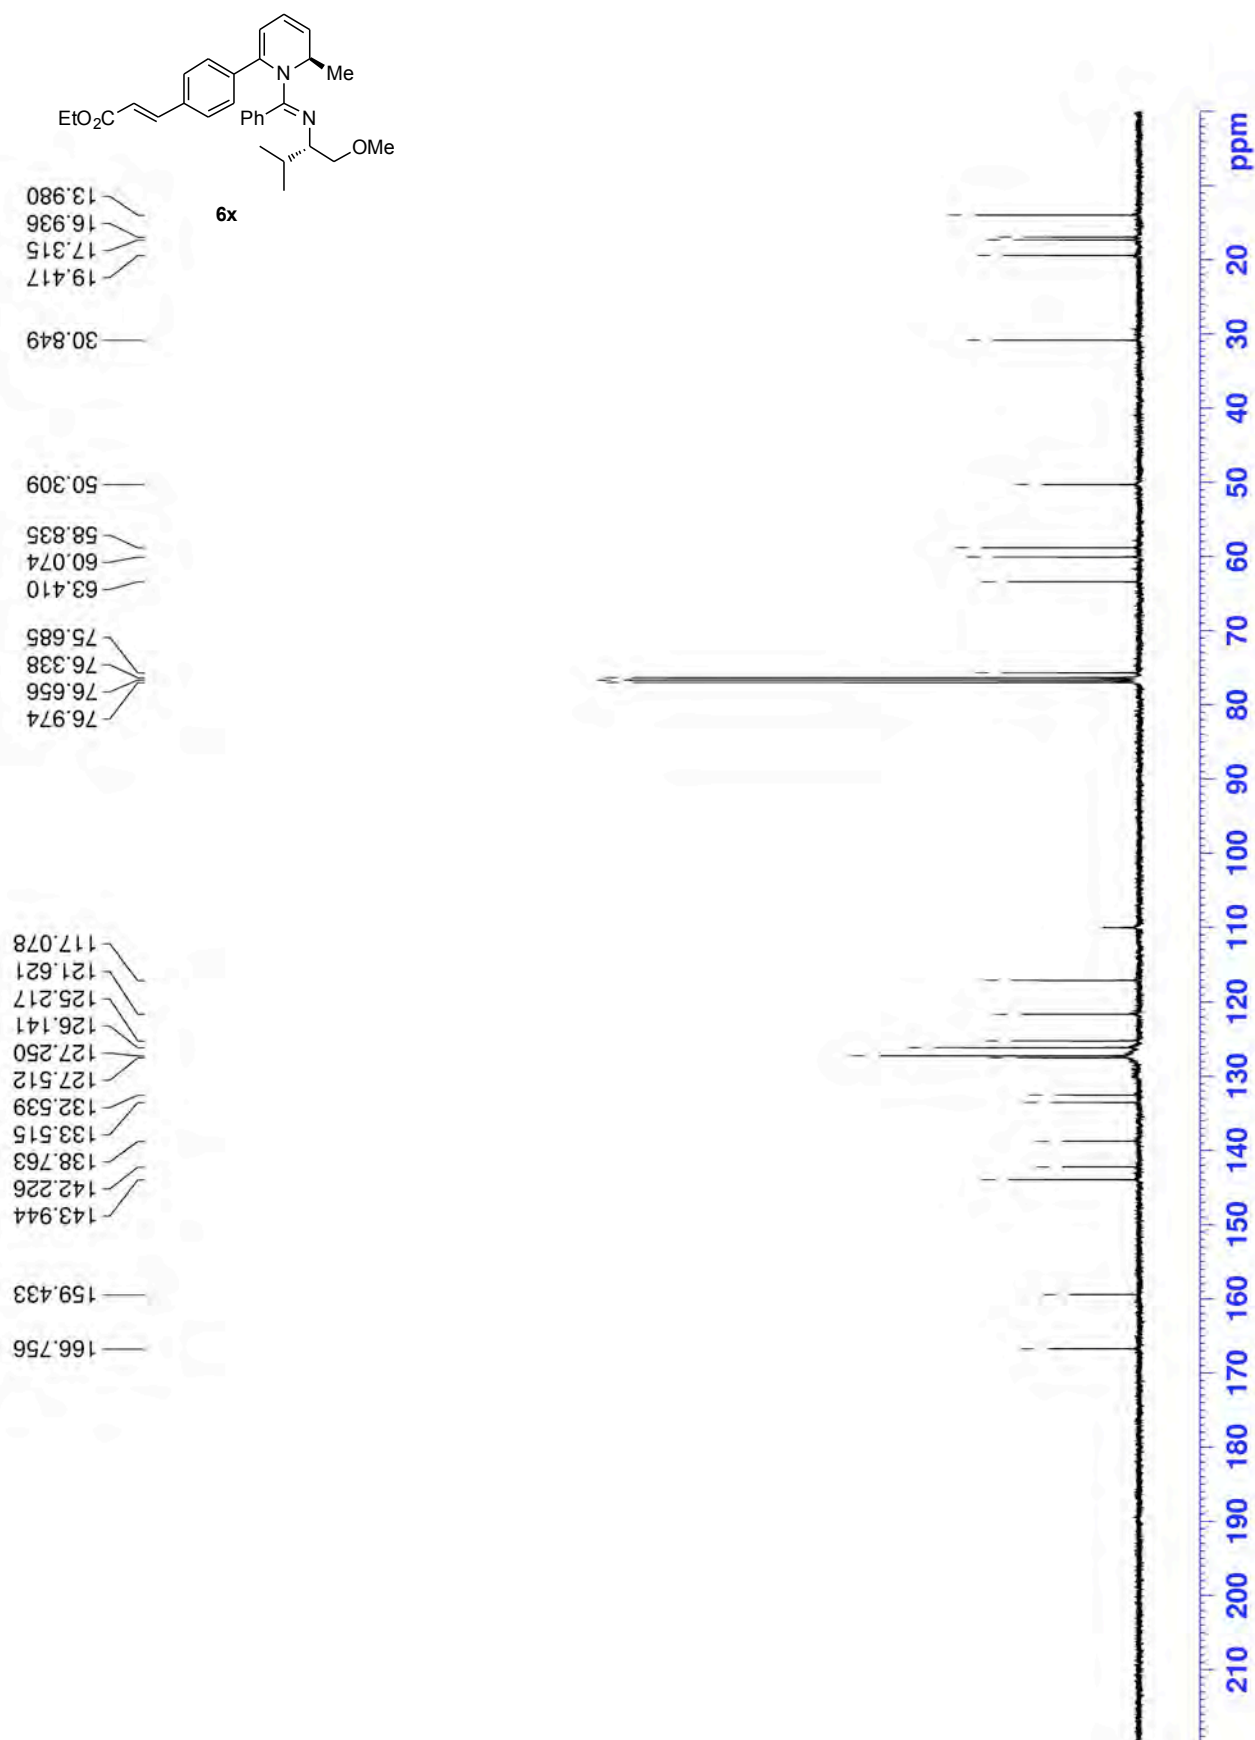



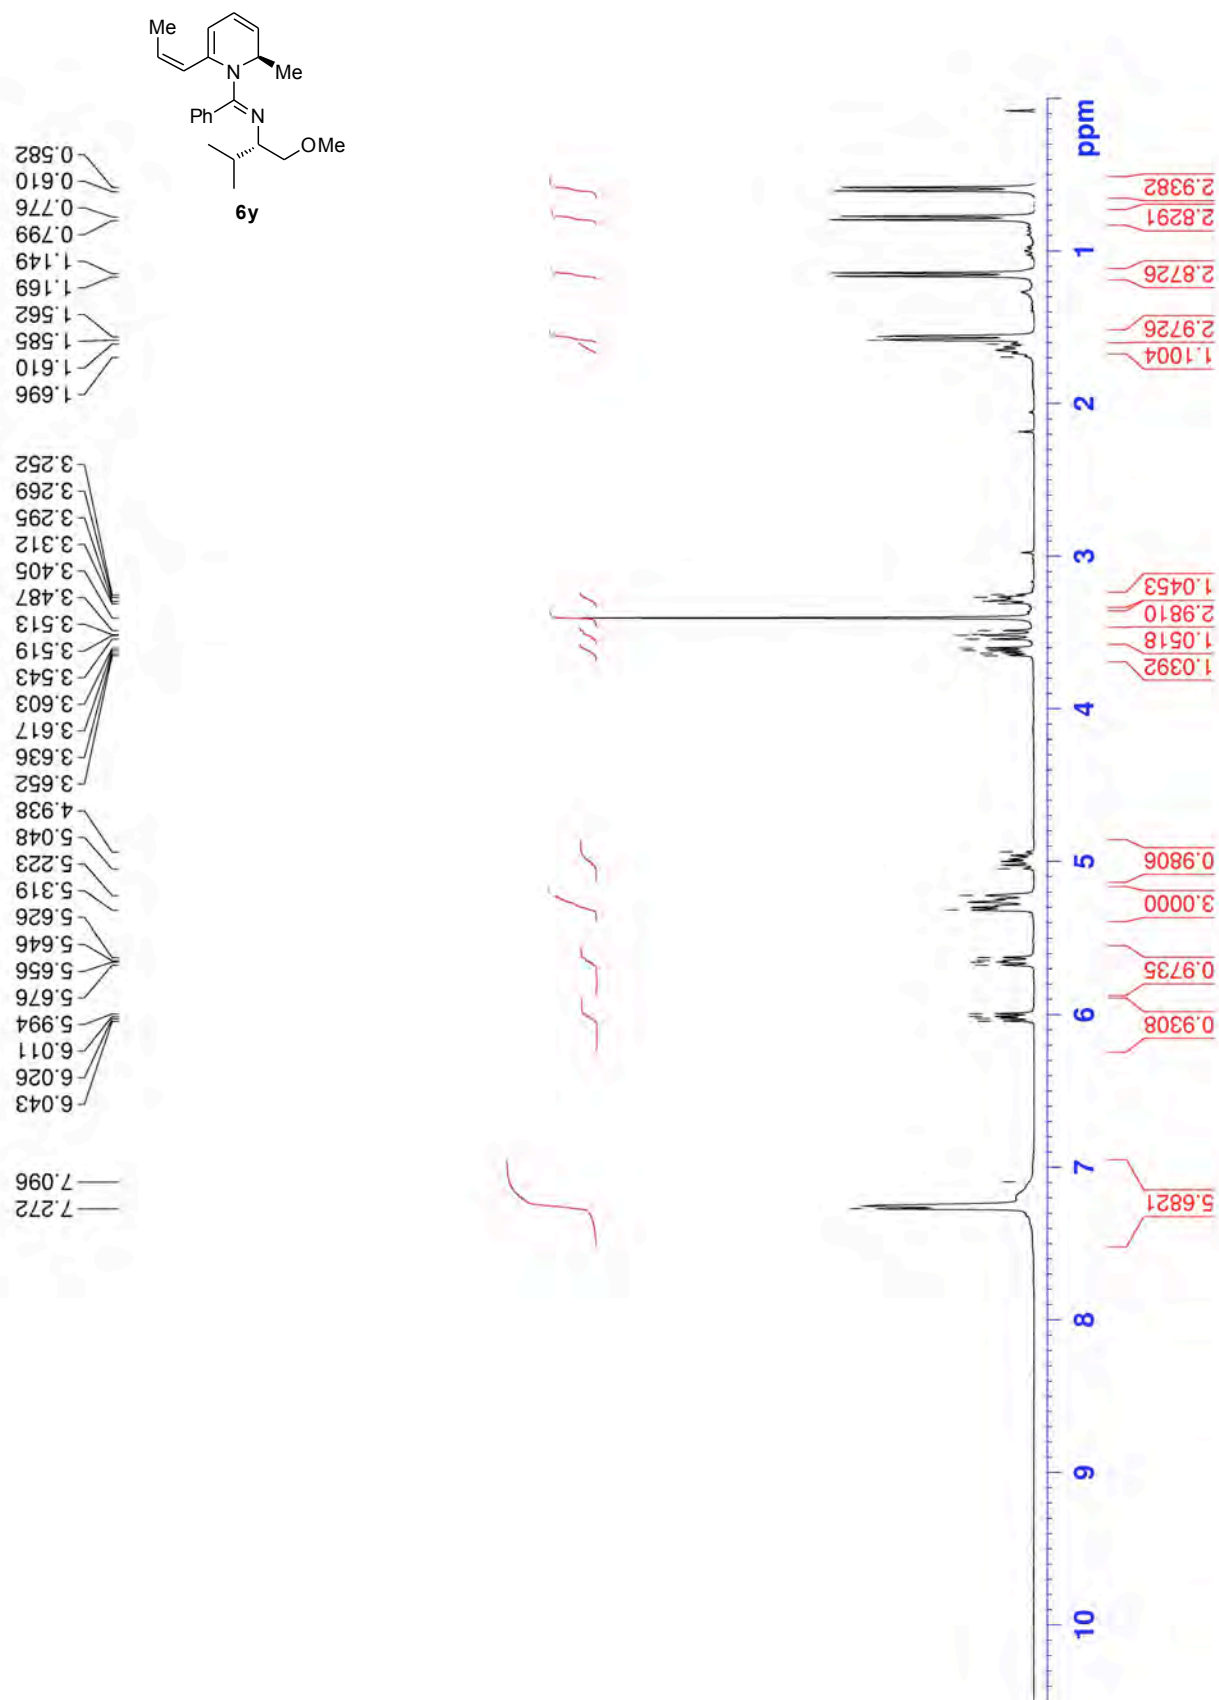

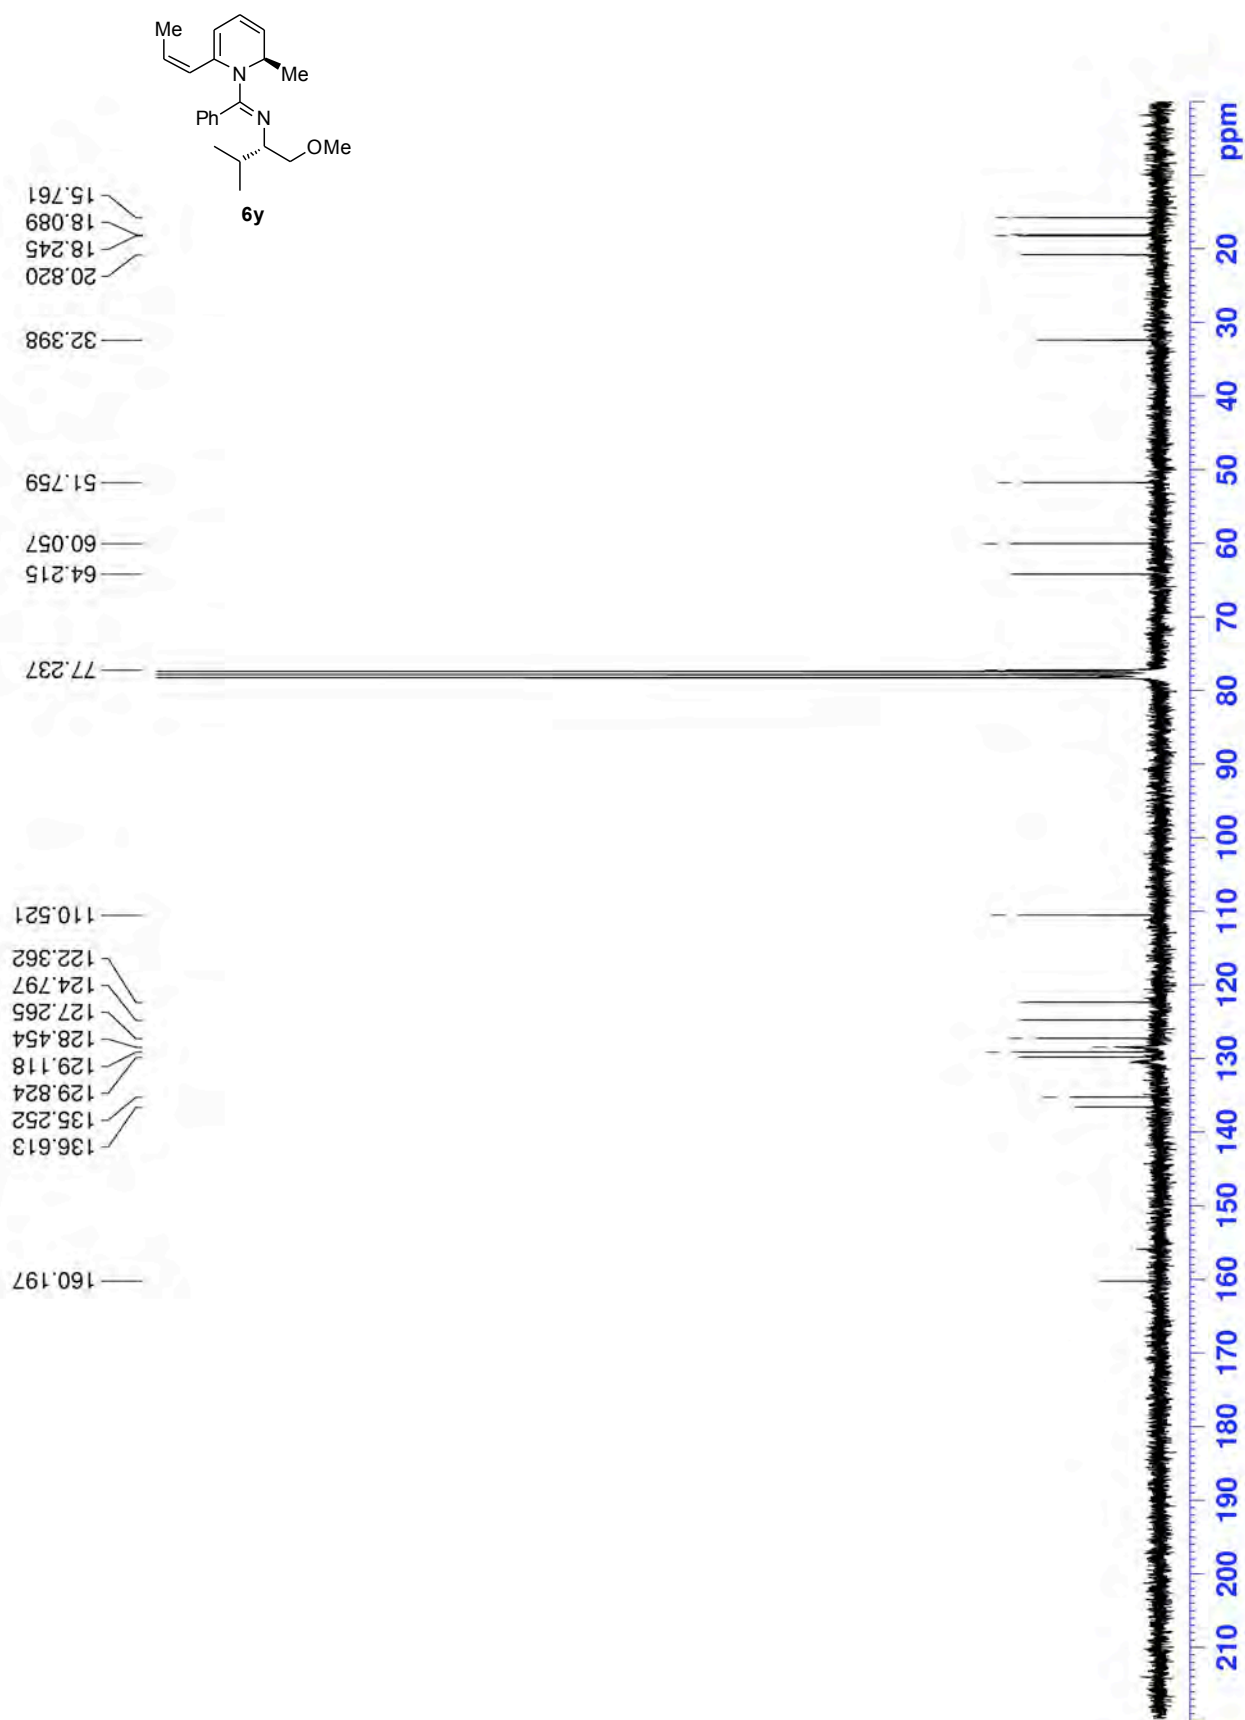

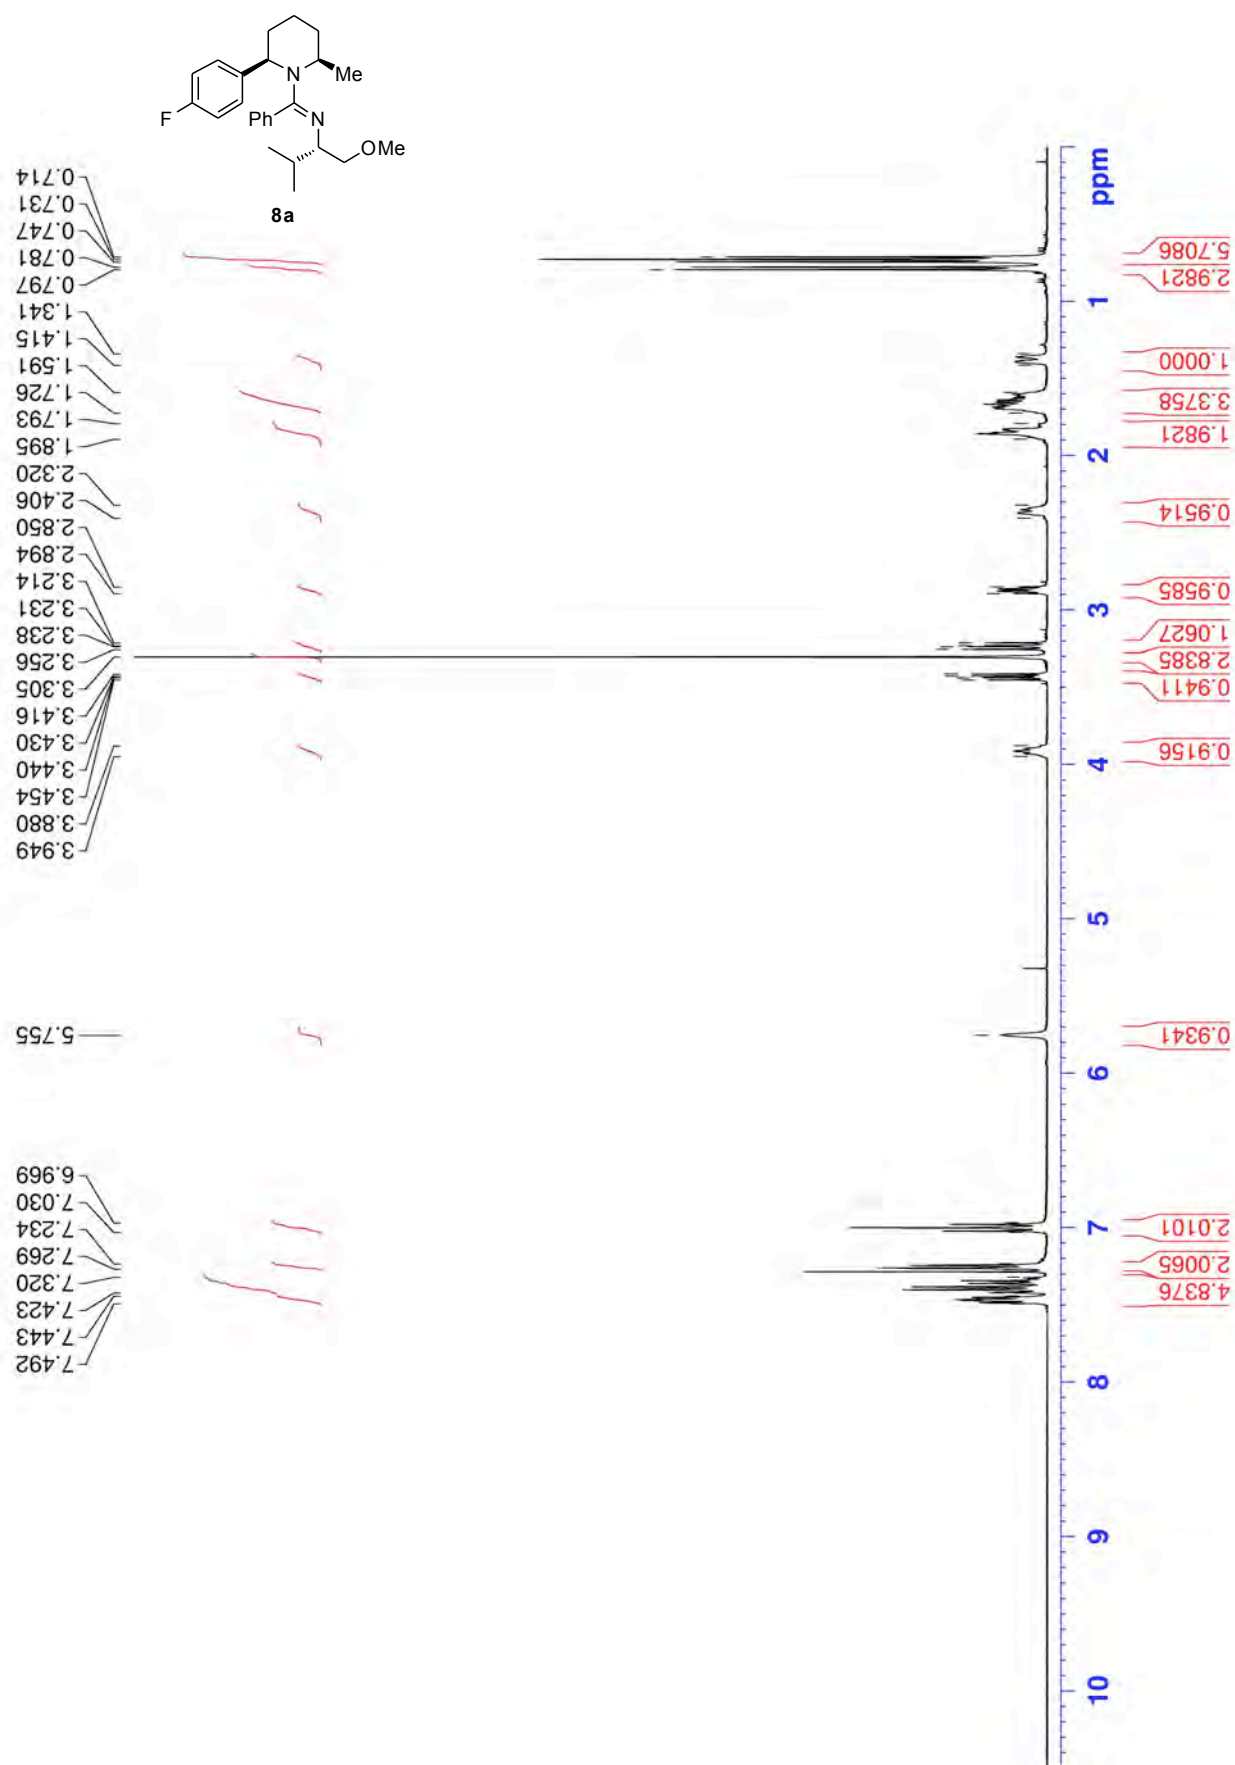

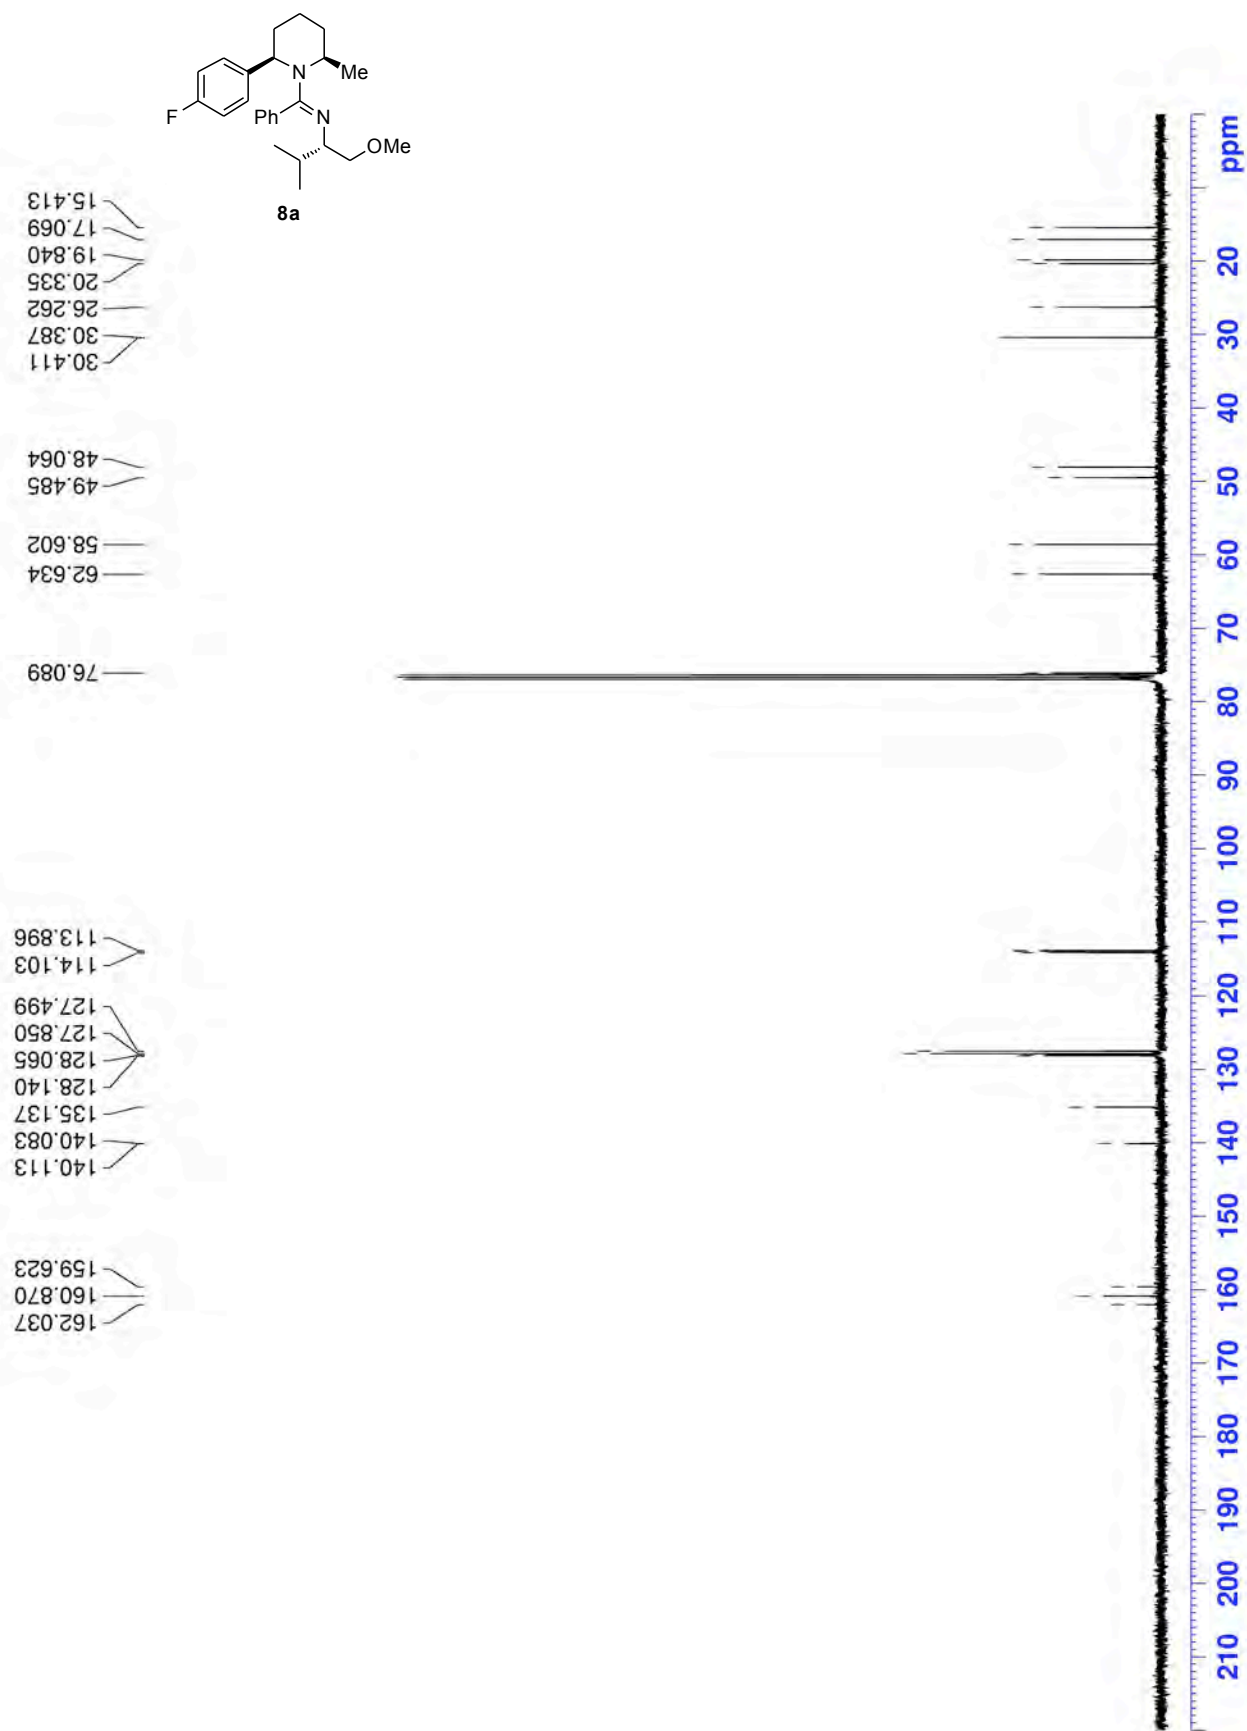

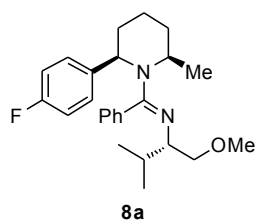

-118.695

ppm

-140

-120

-100

-80

-60

-40

-20

0

20

40

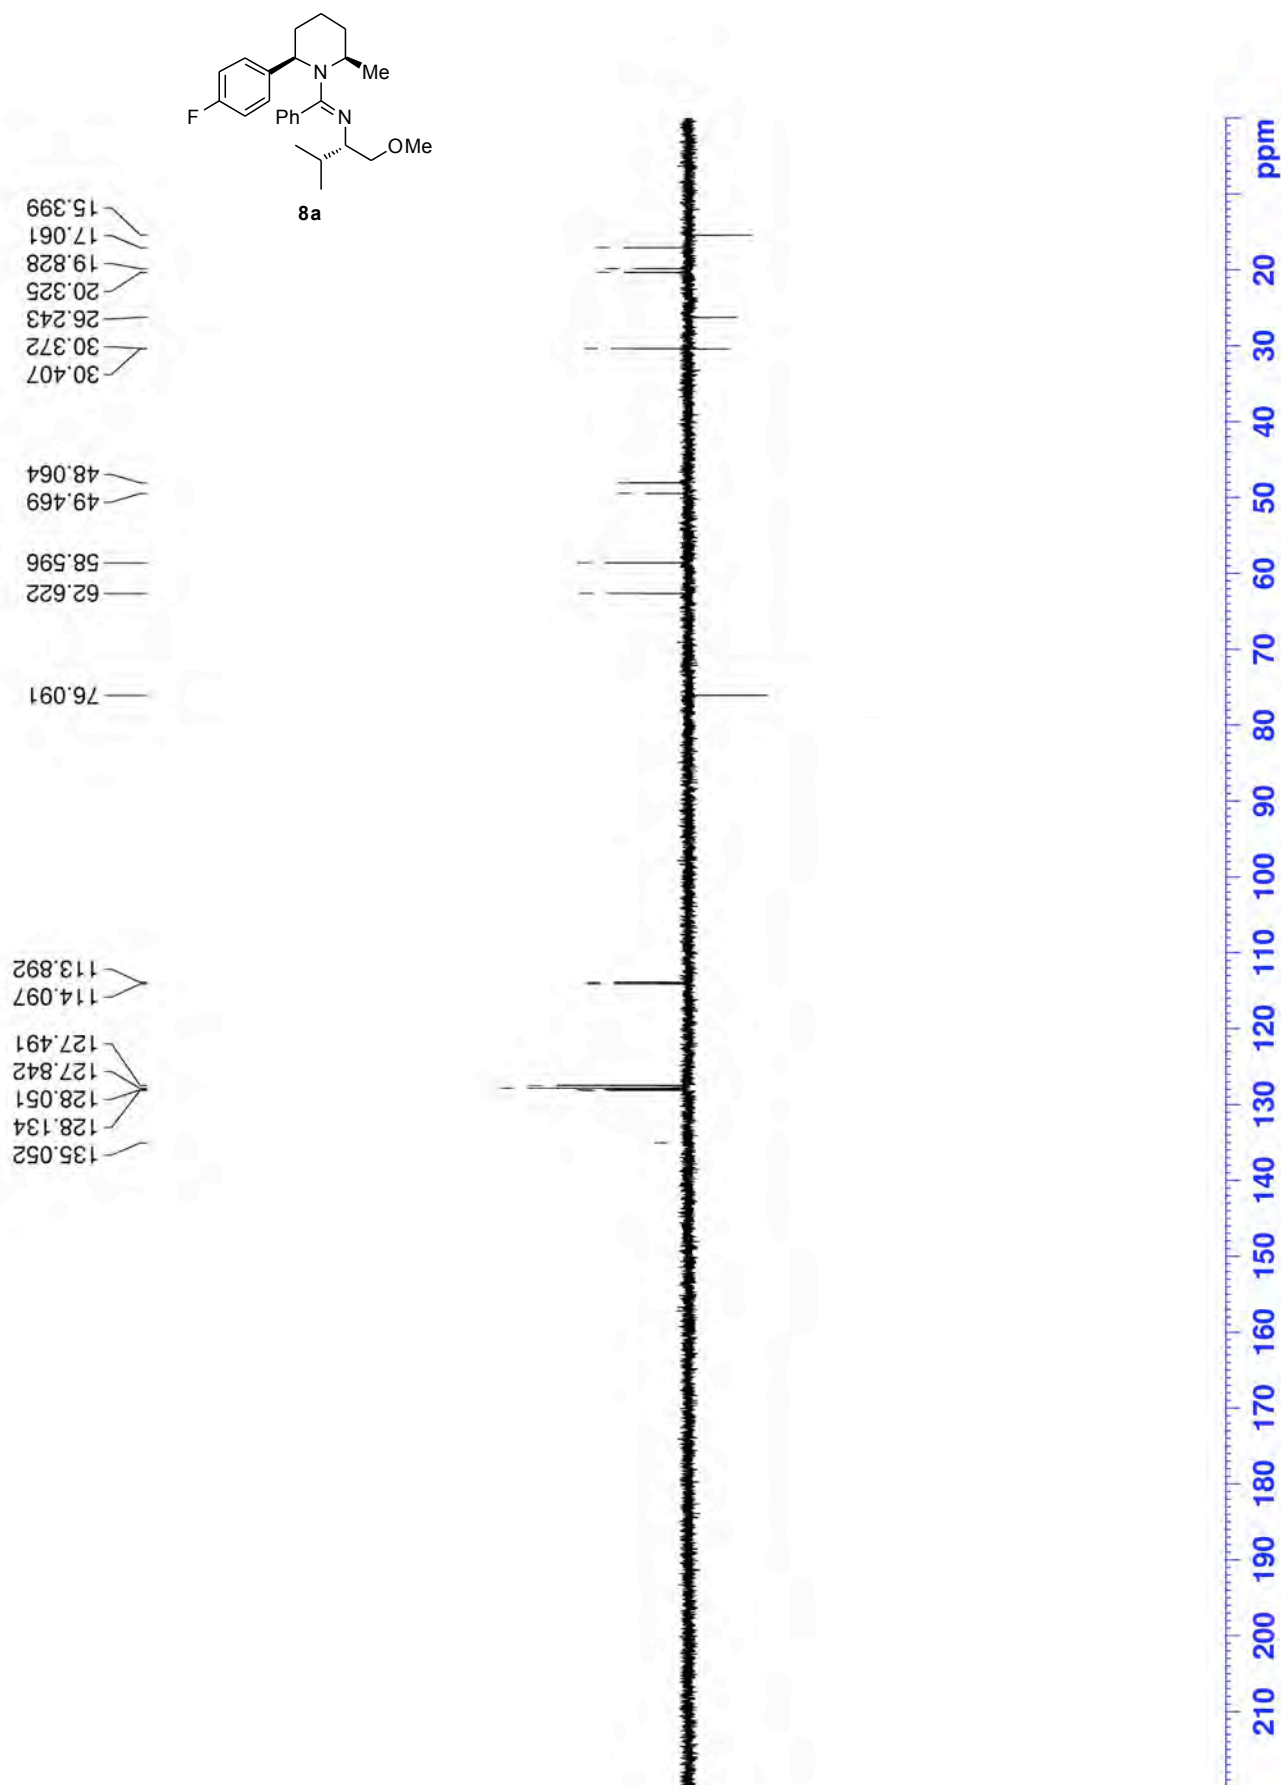

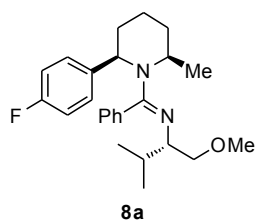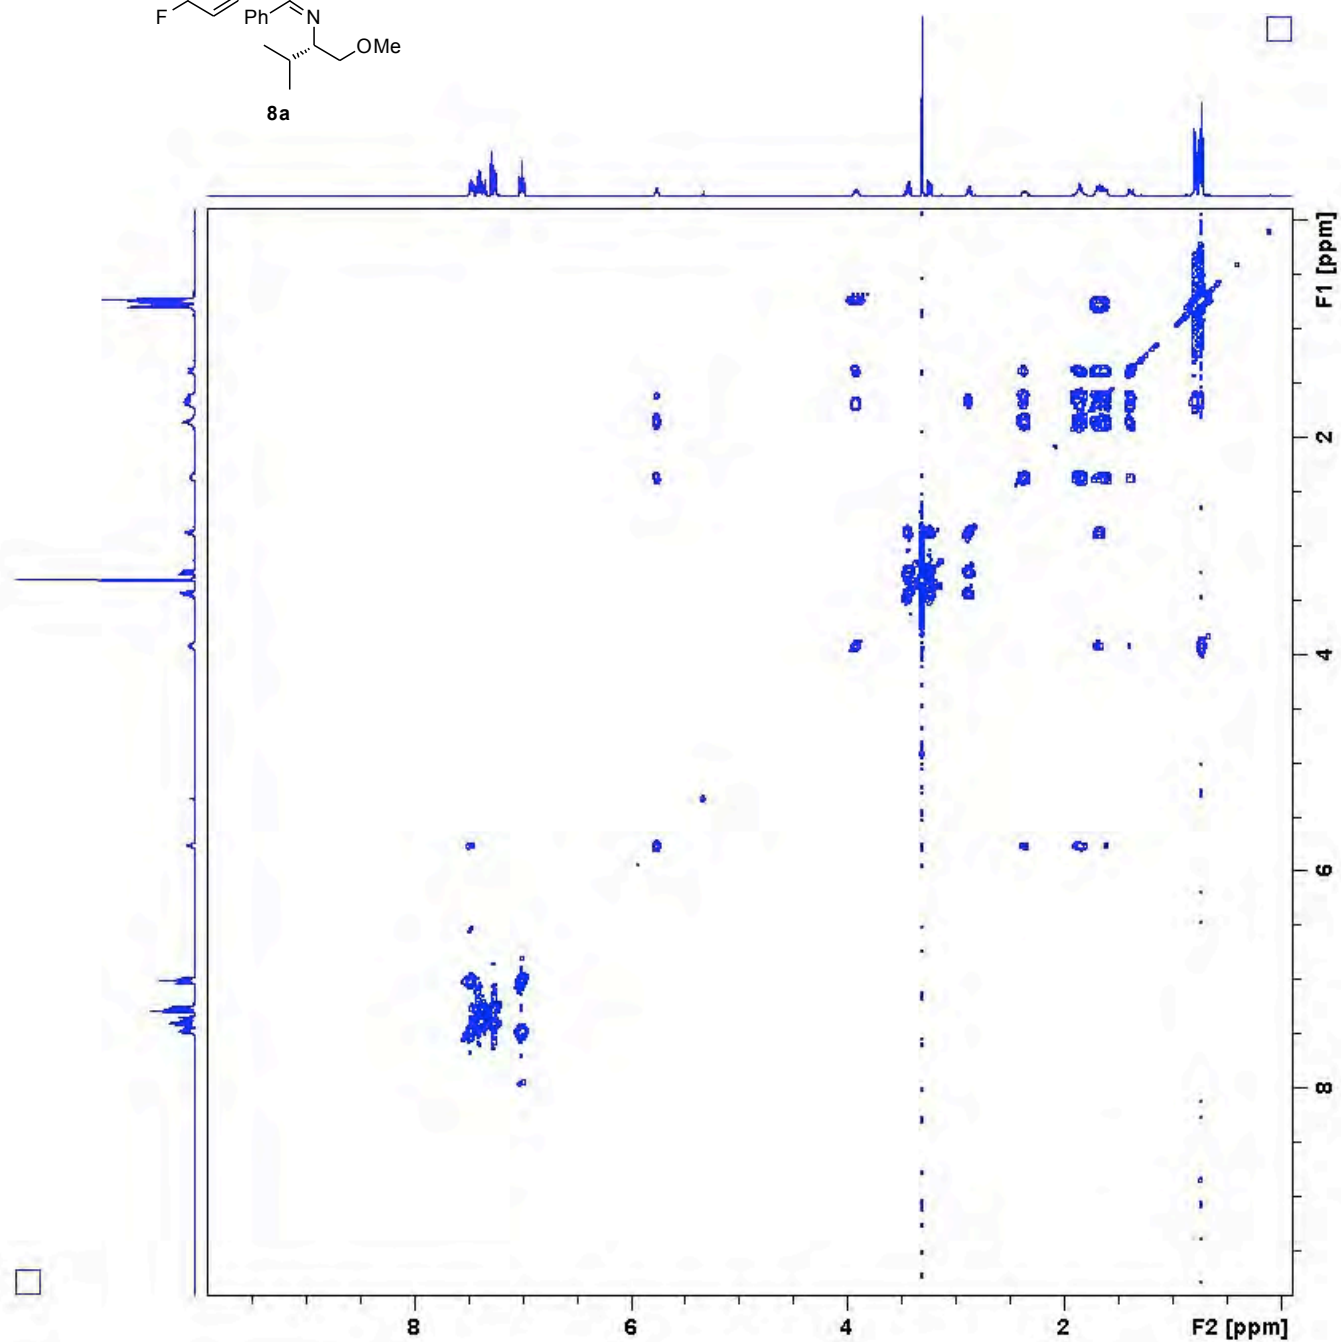

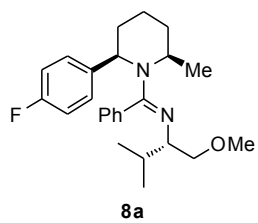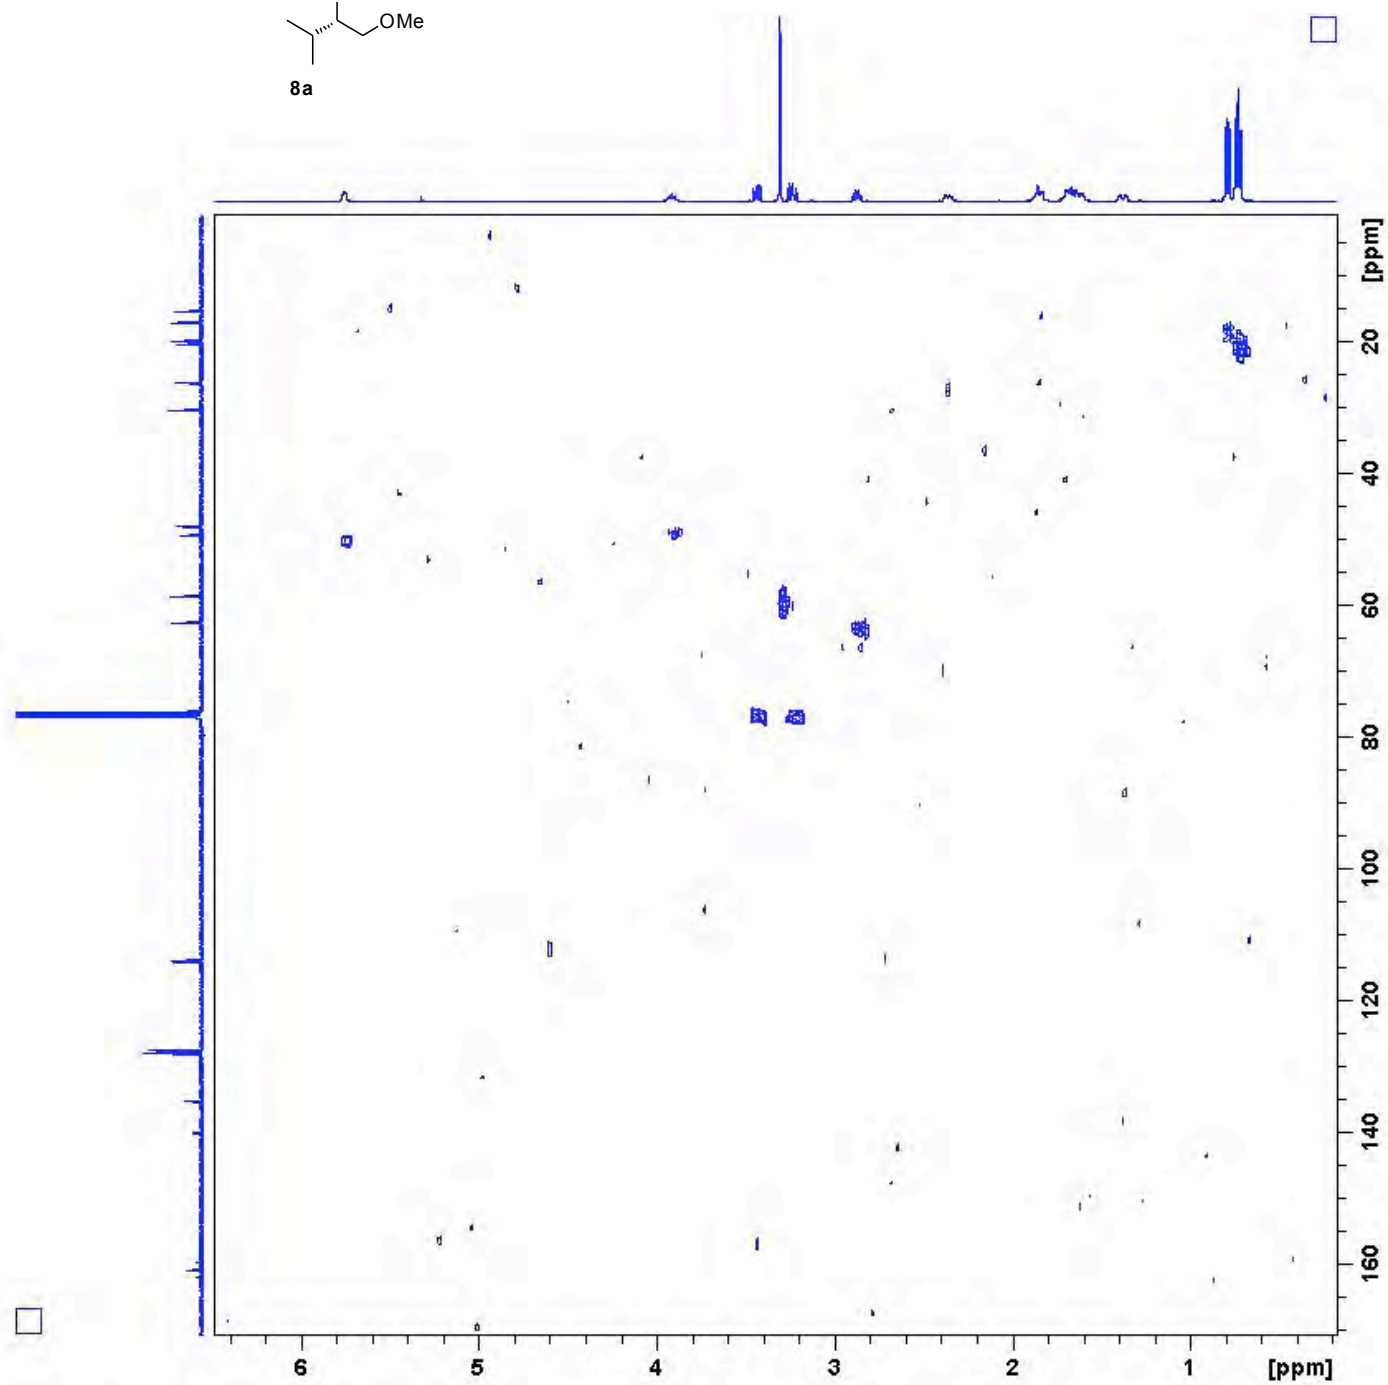



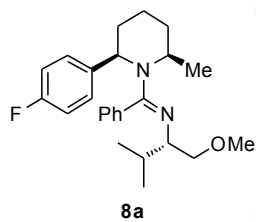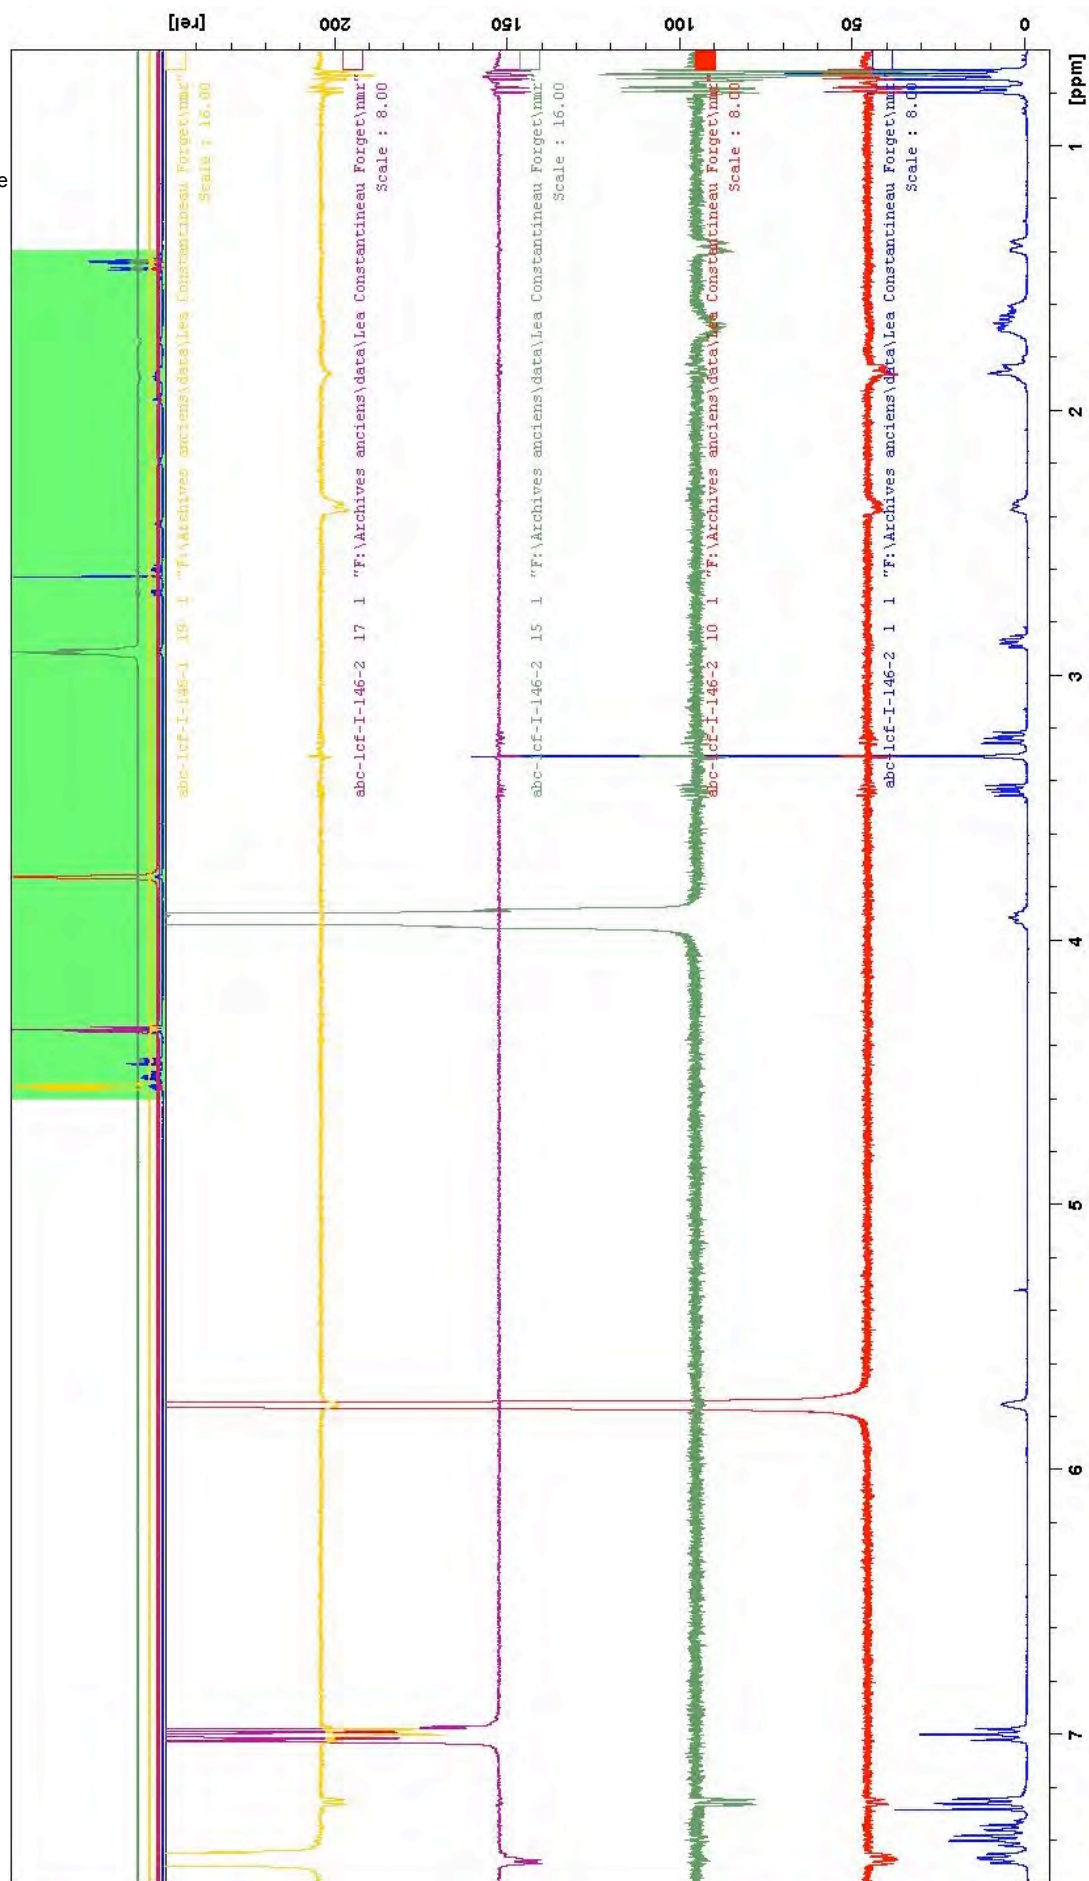

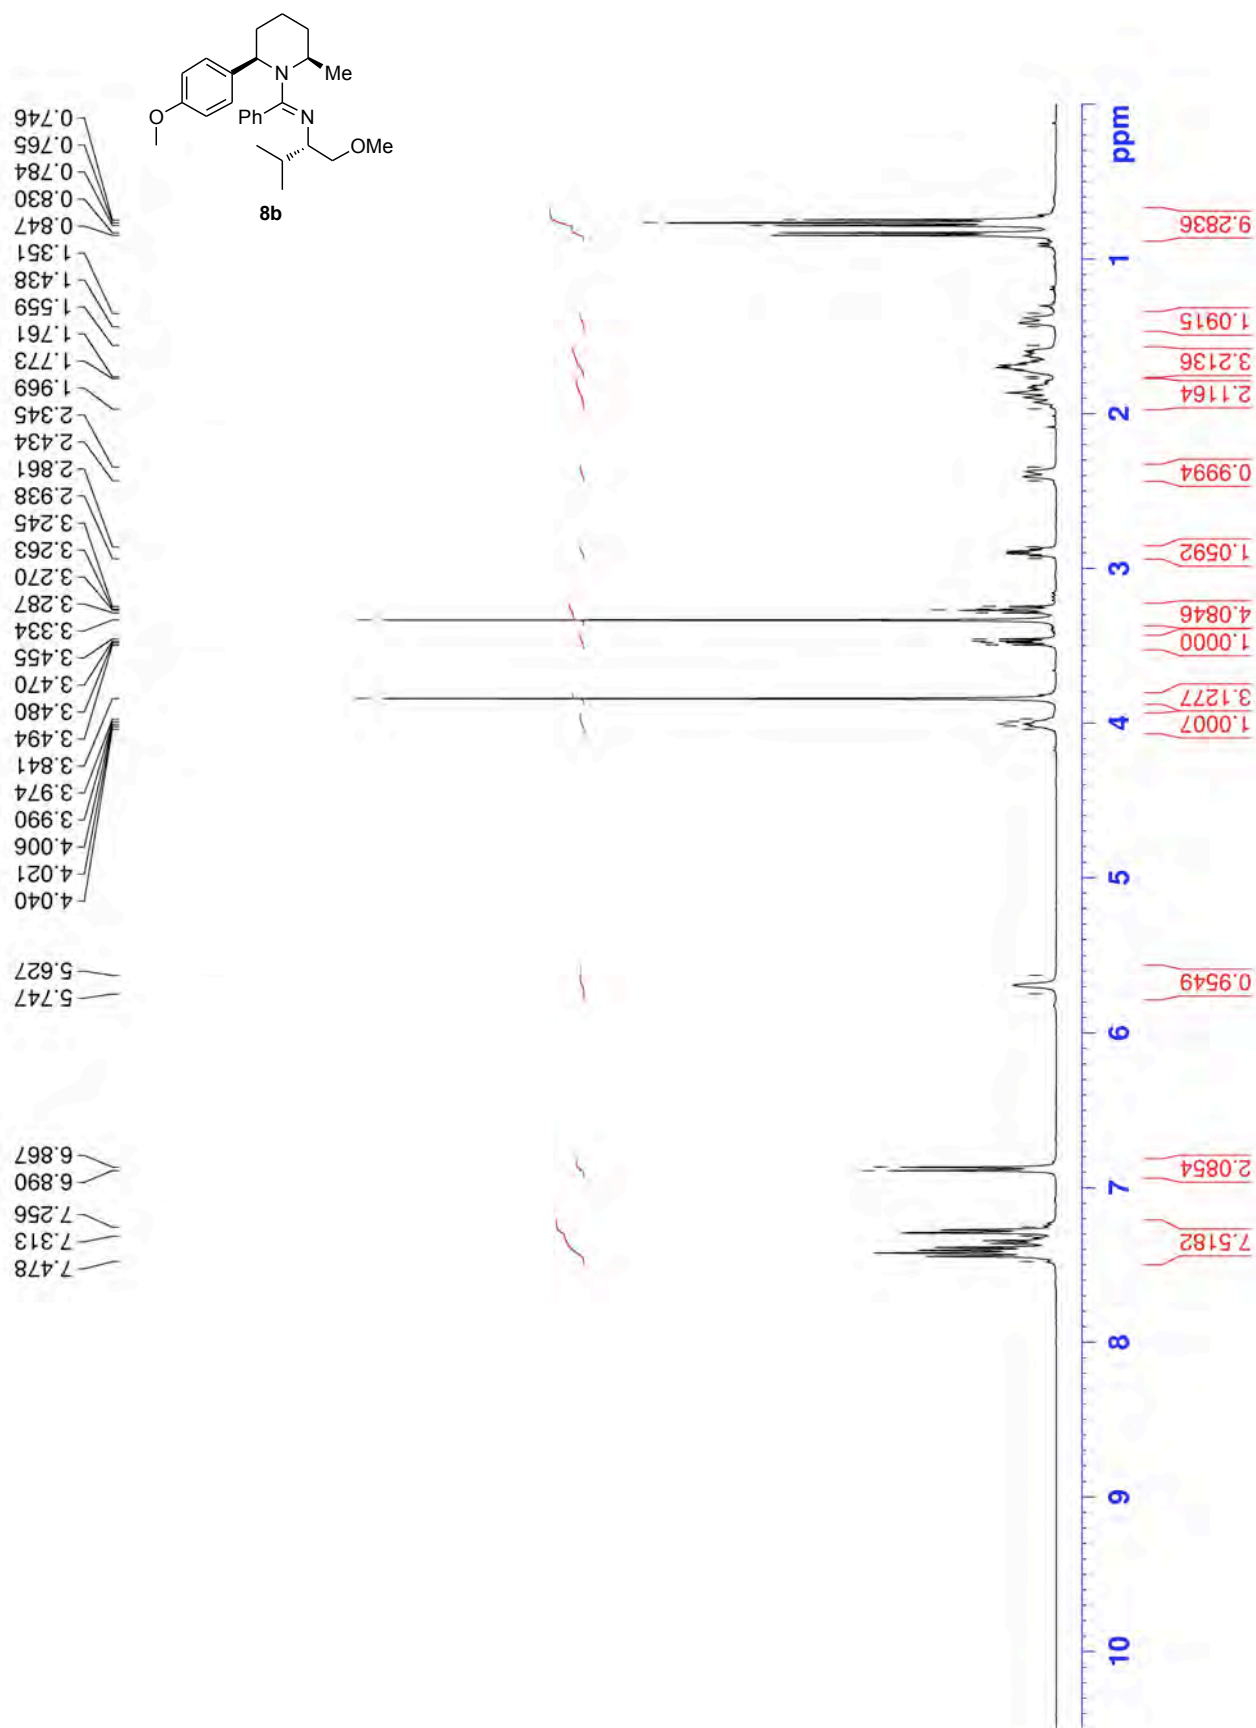

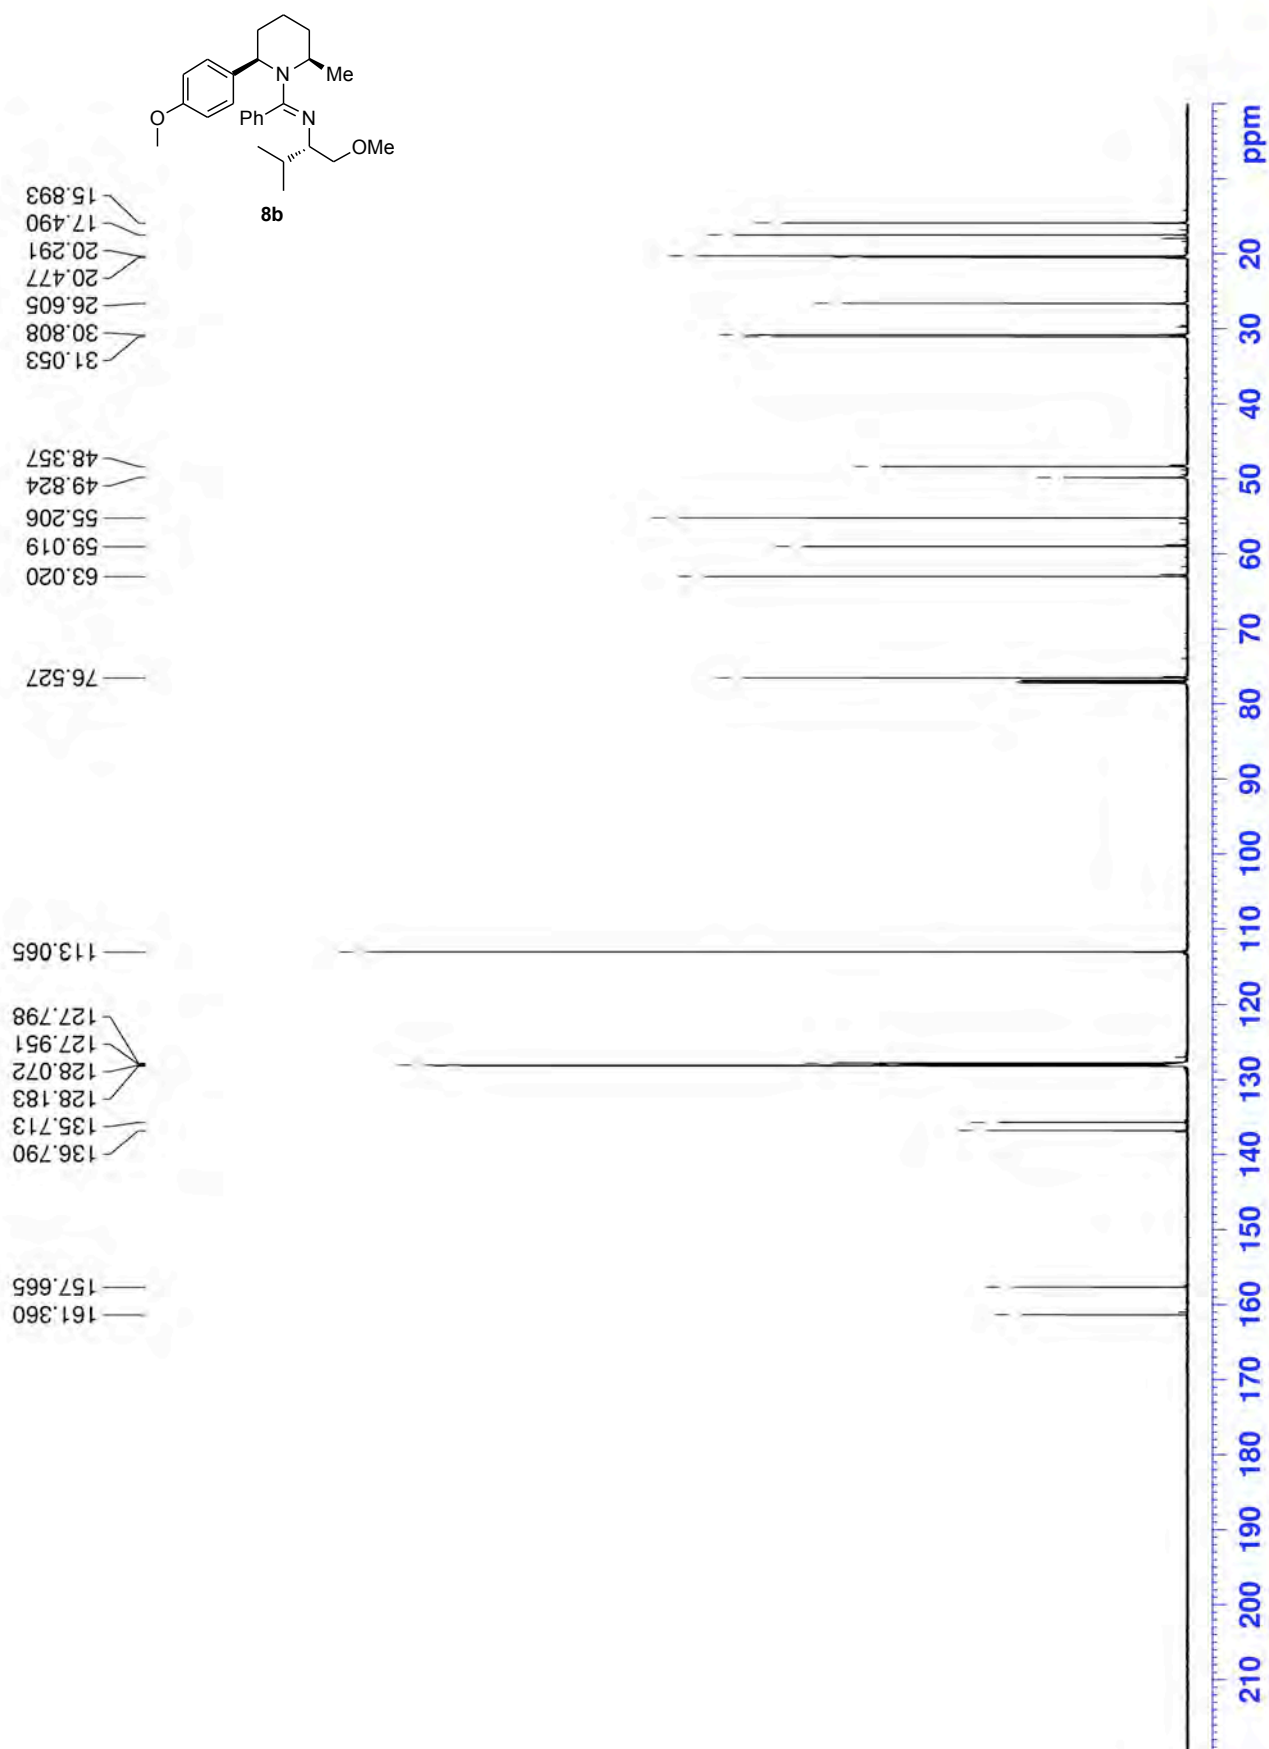

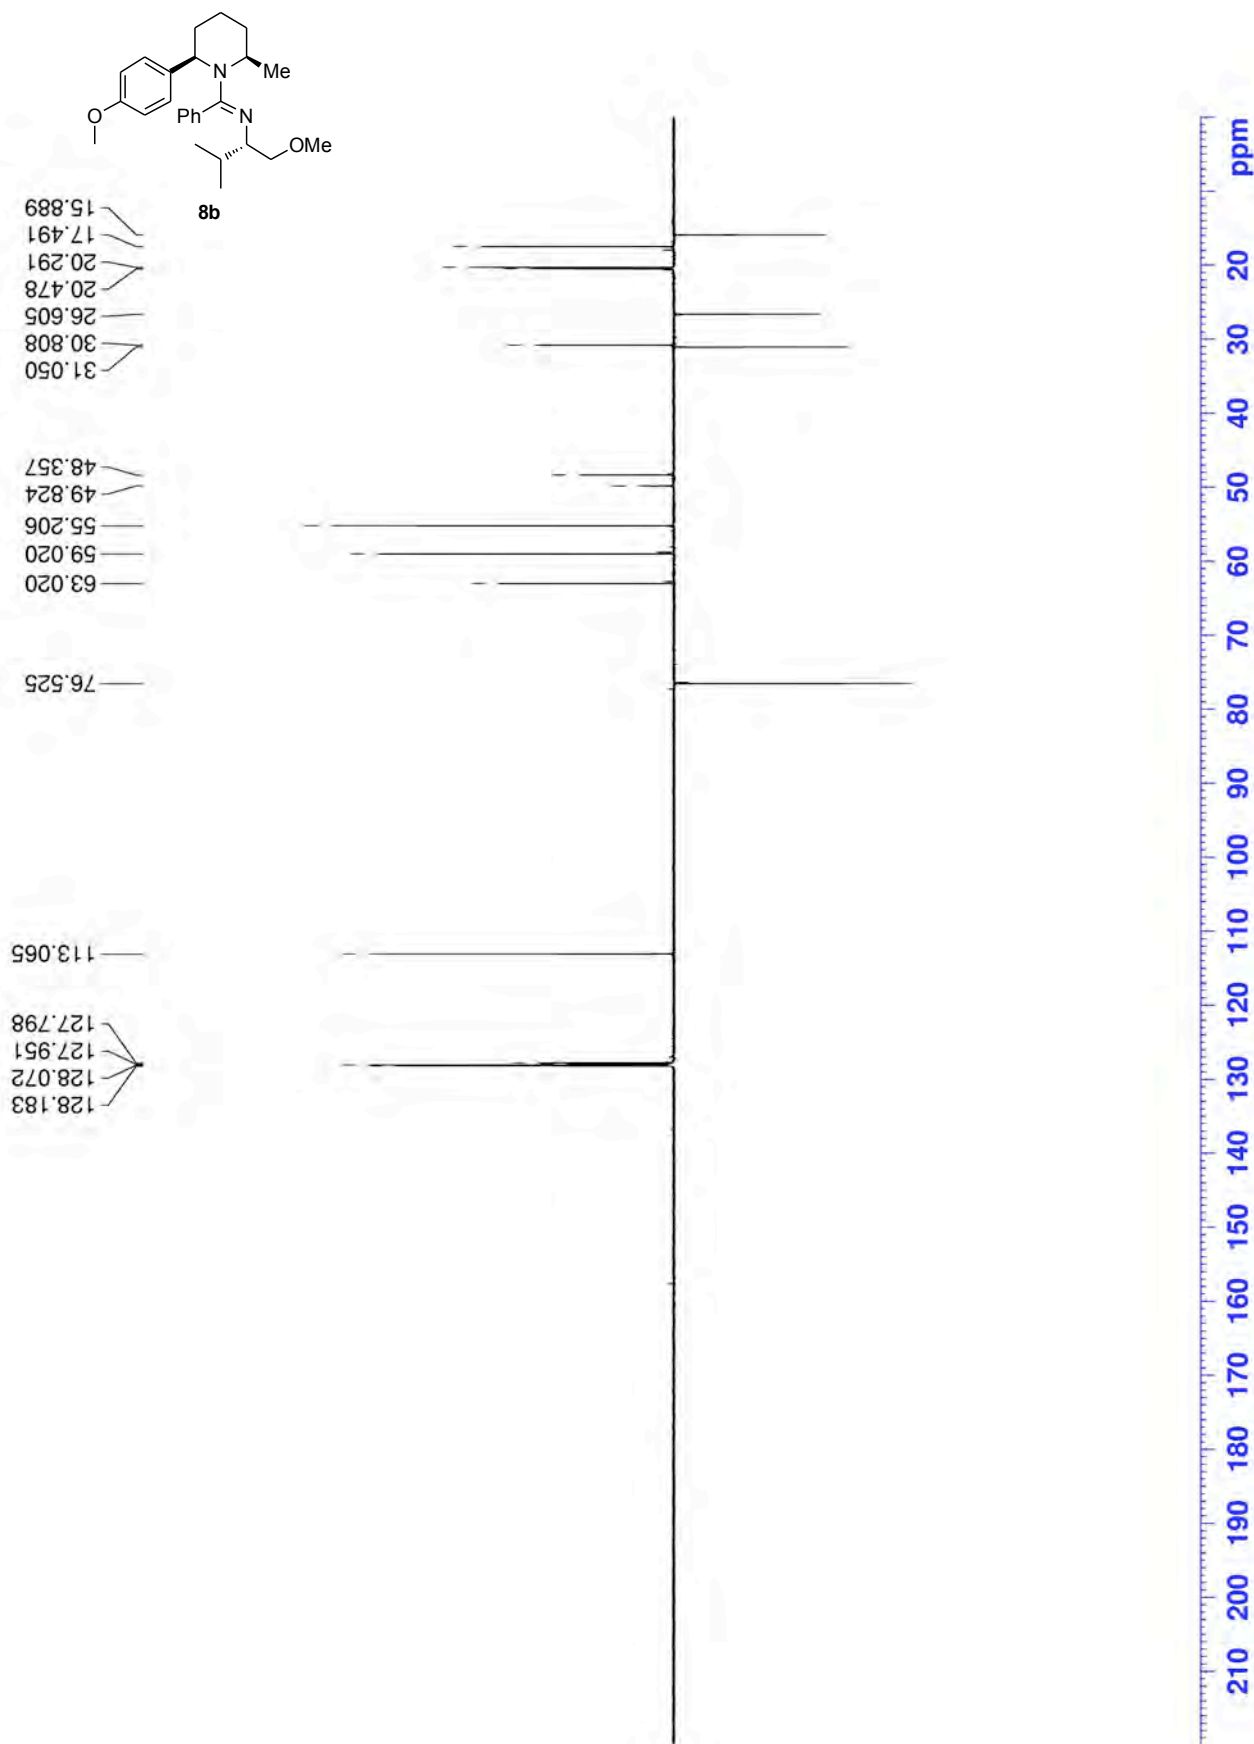

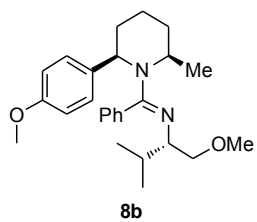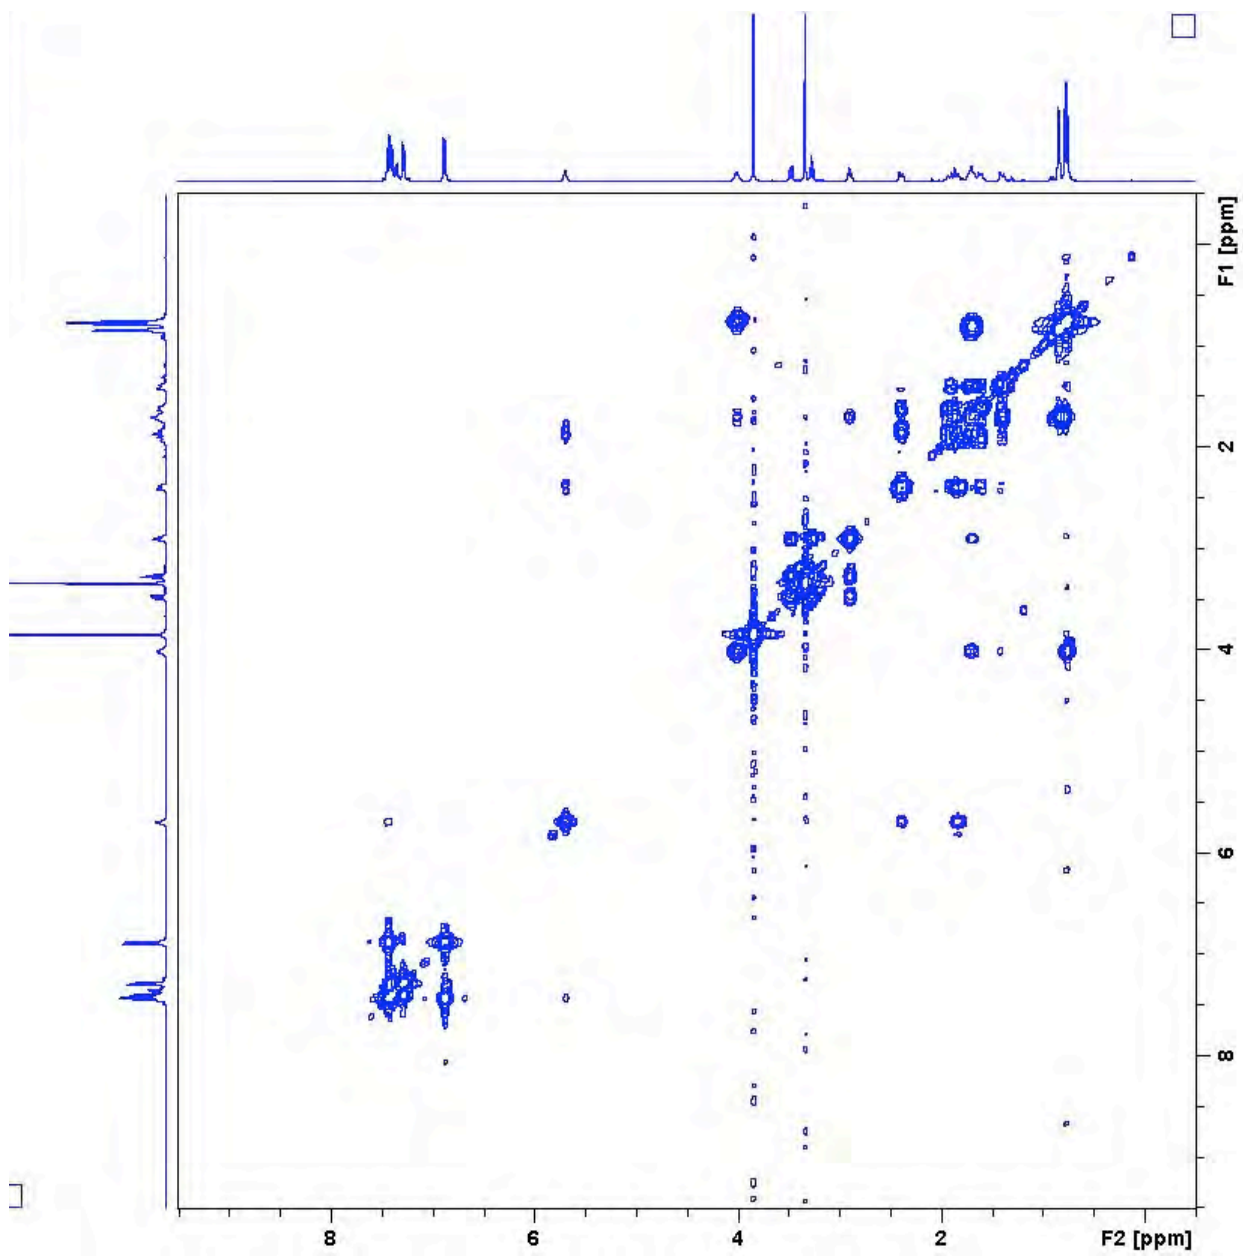

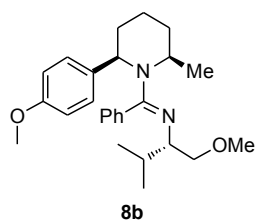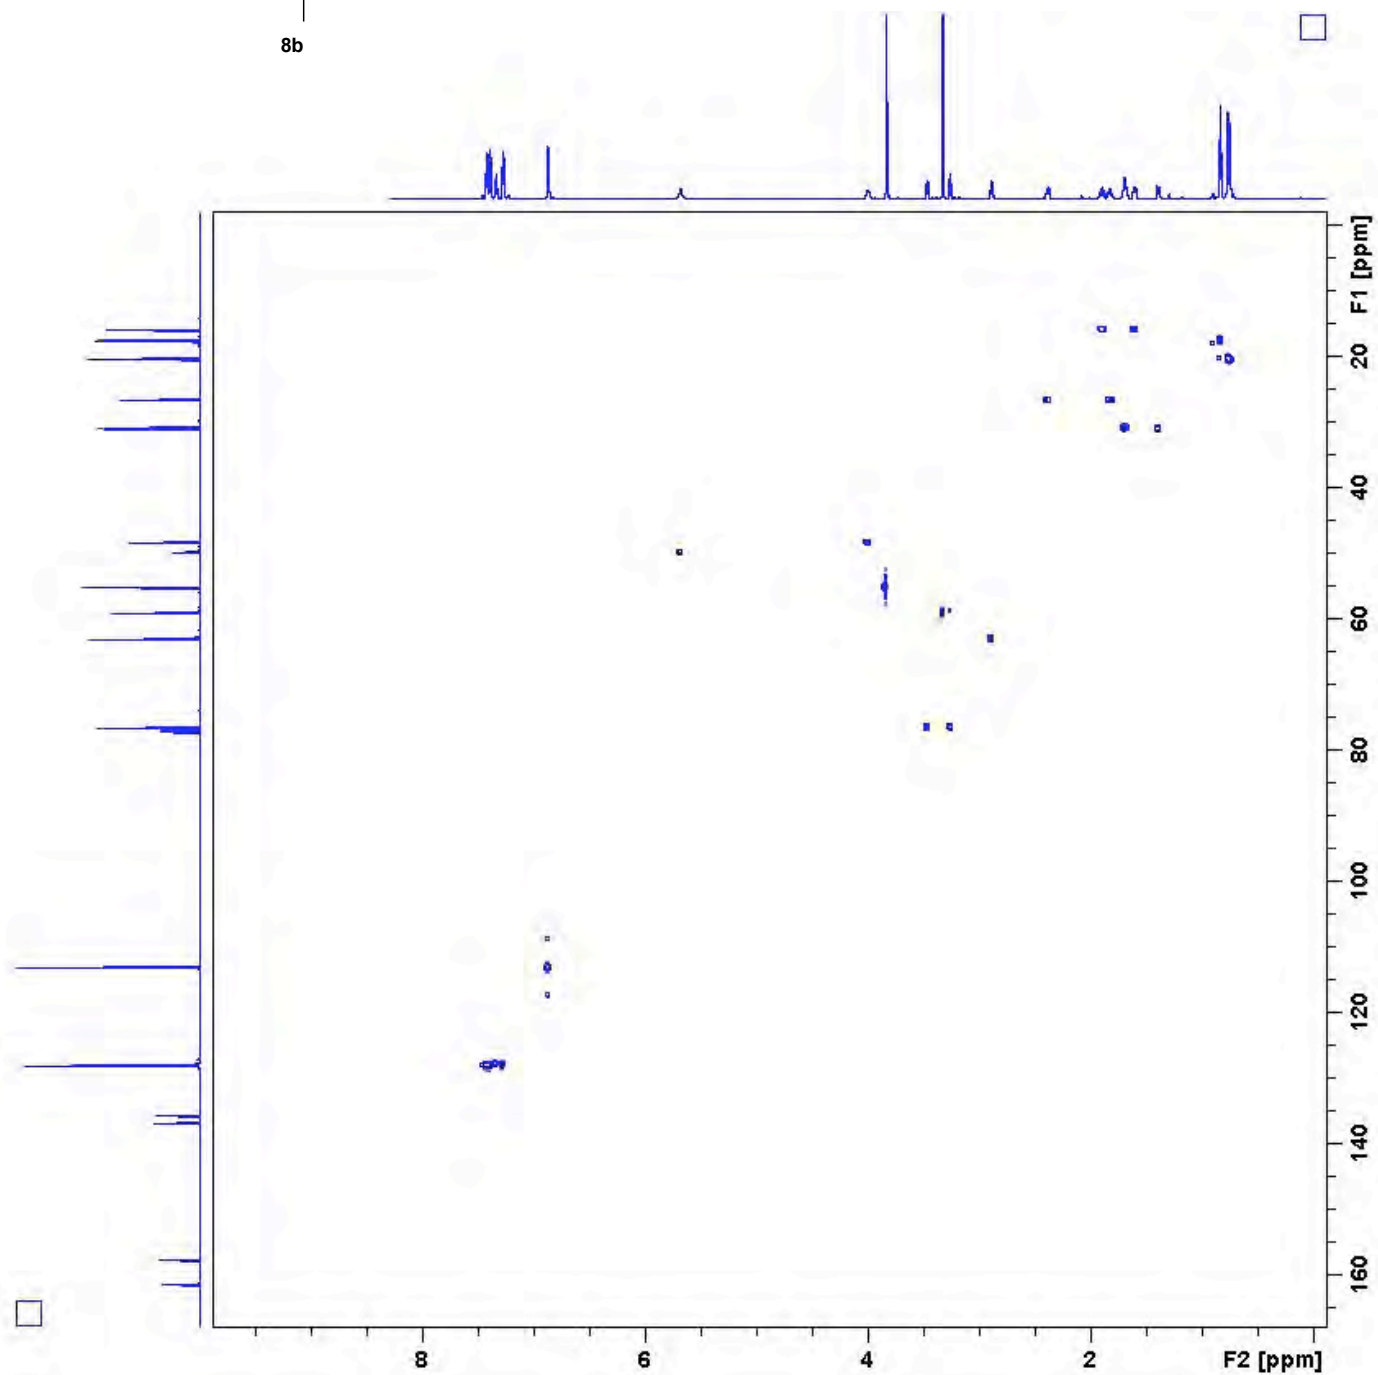

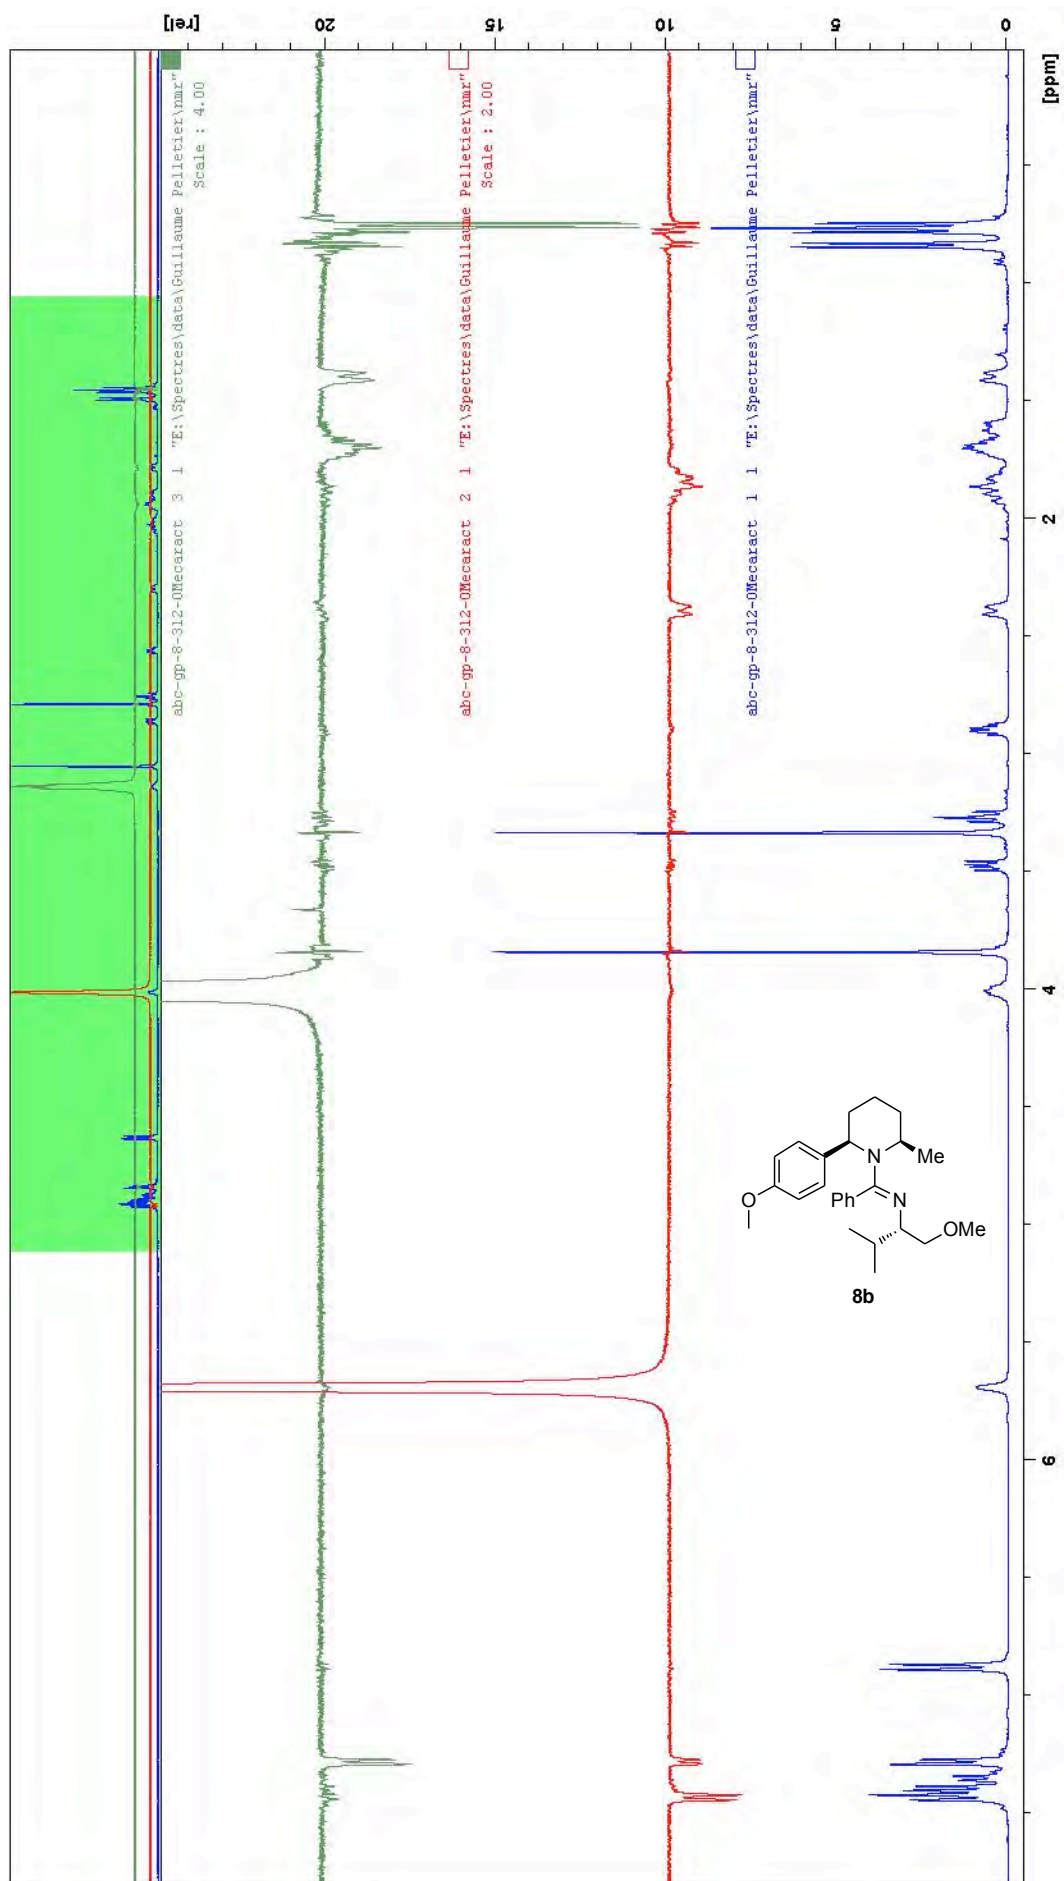

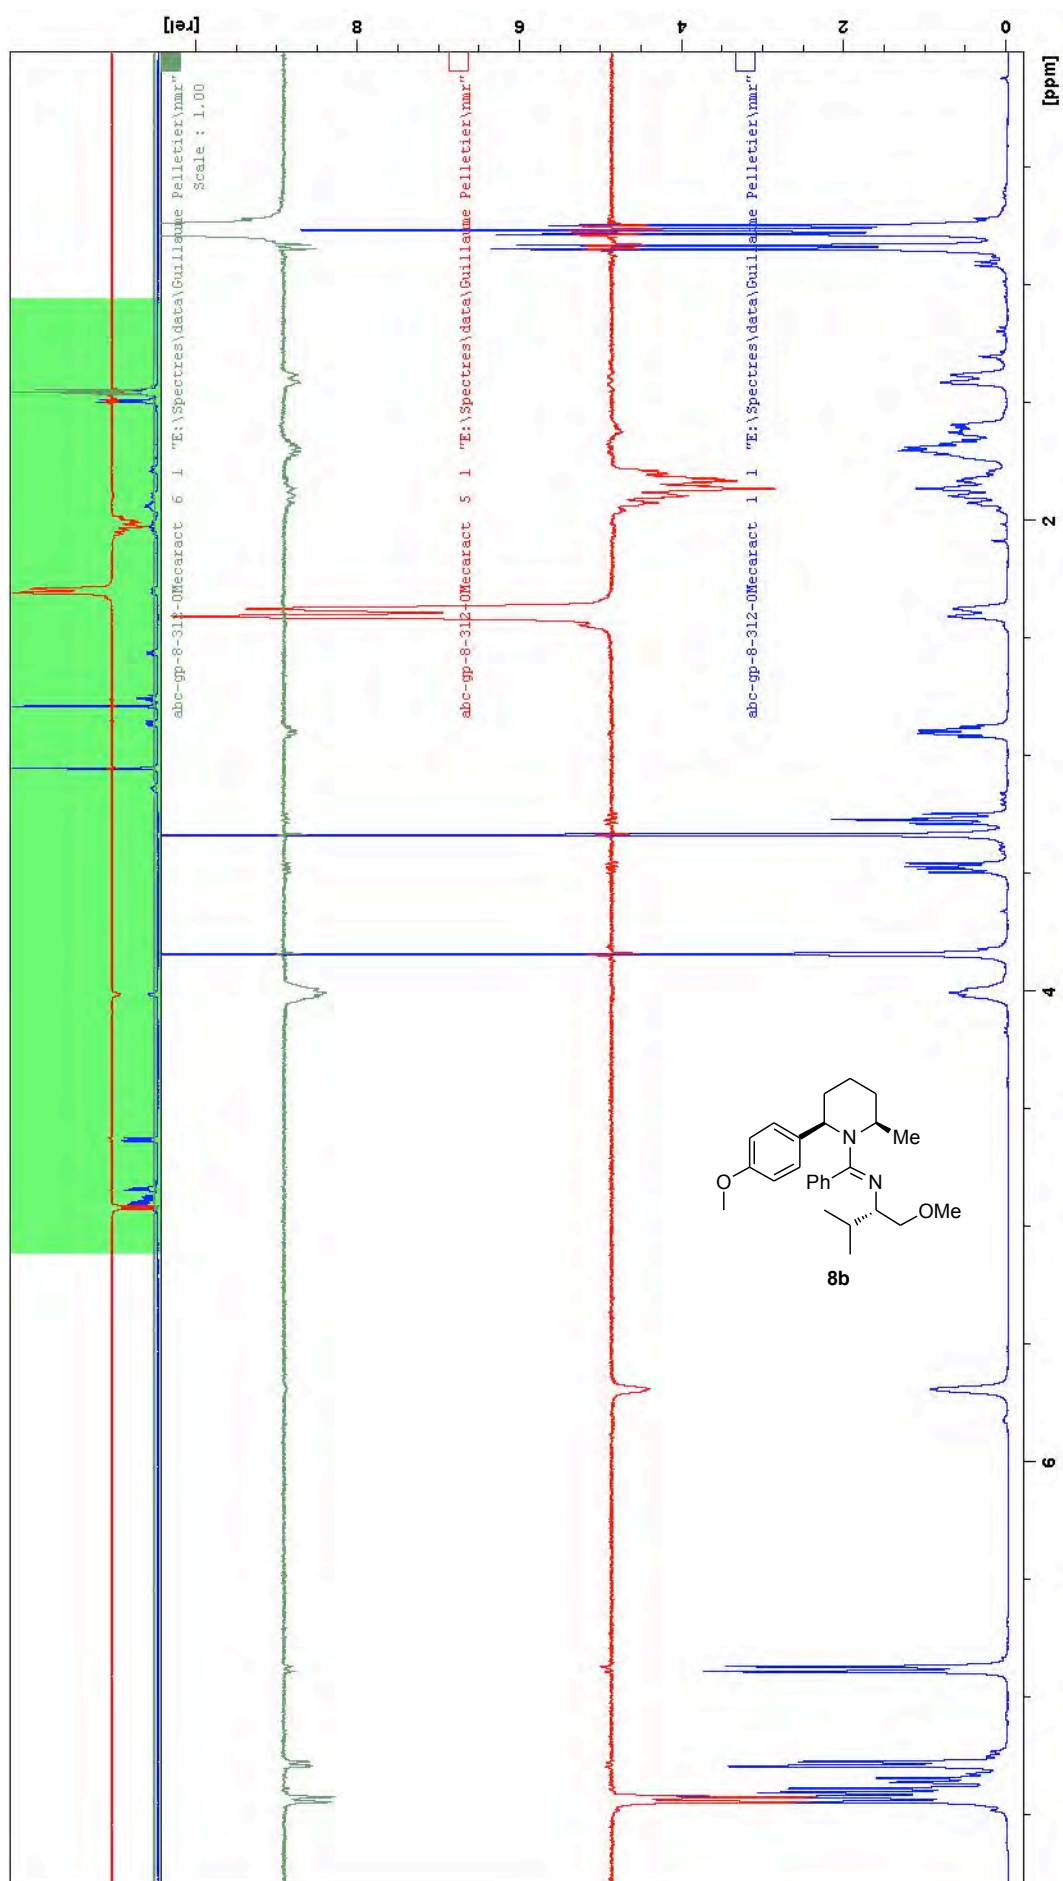



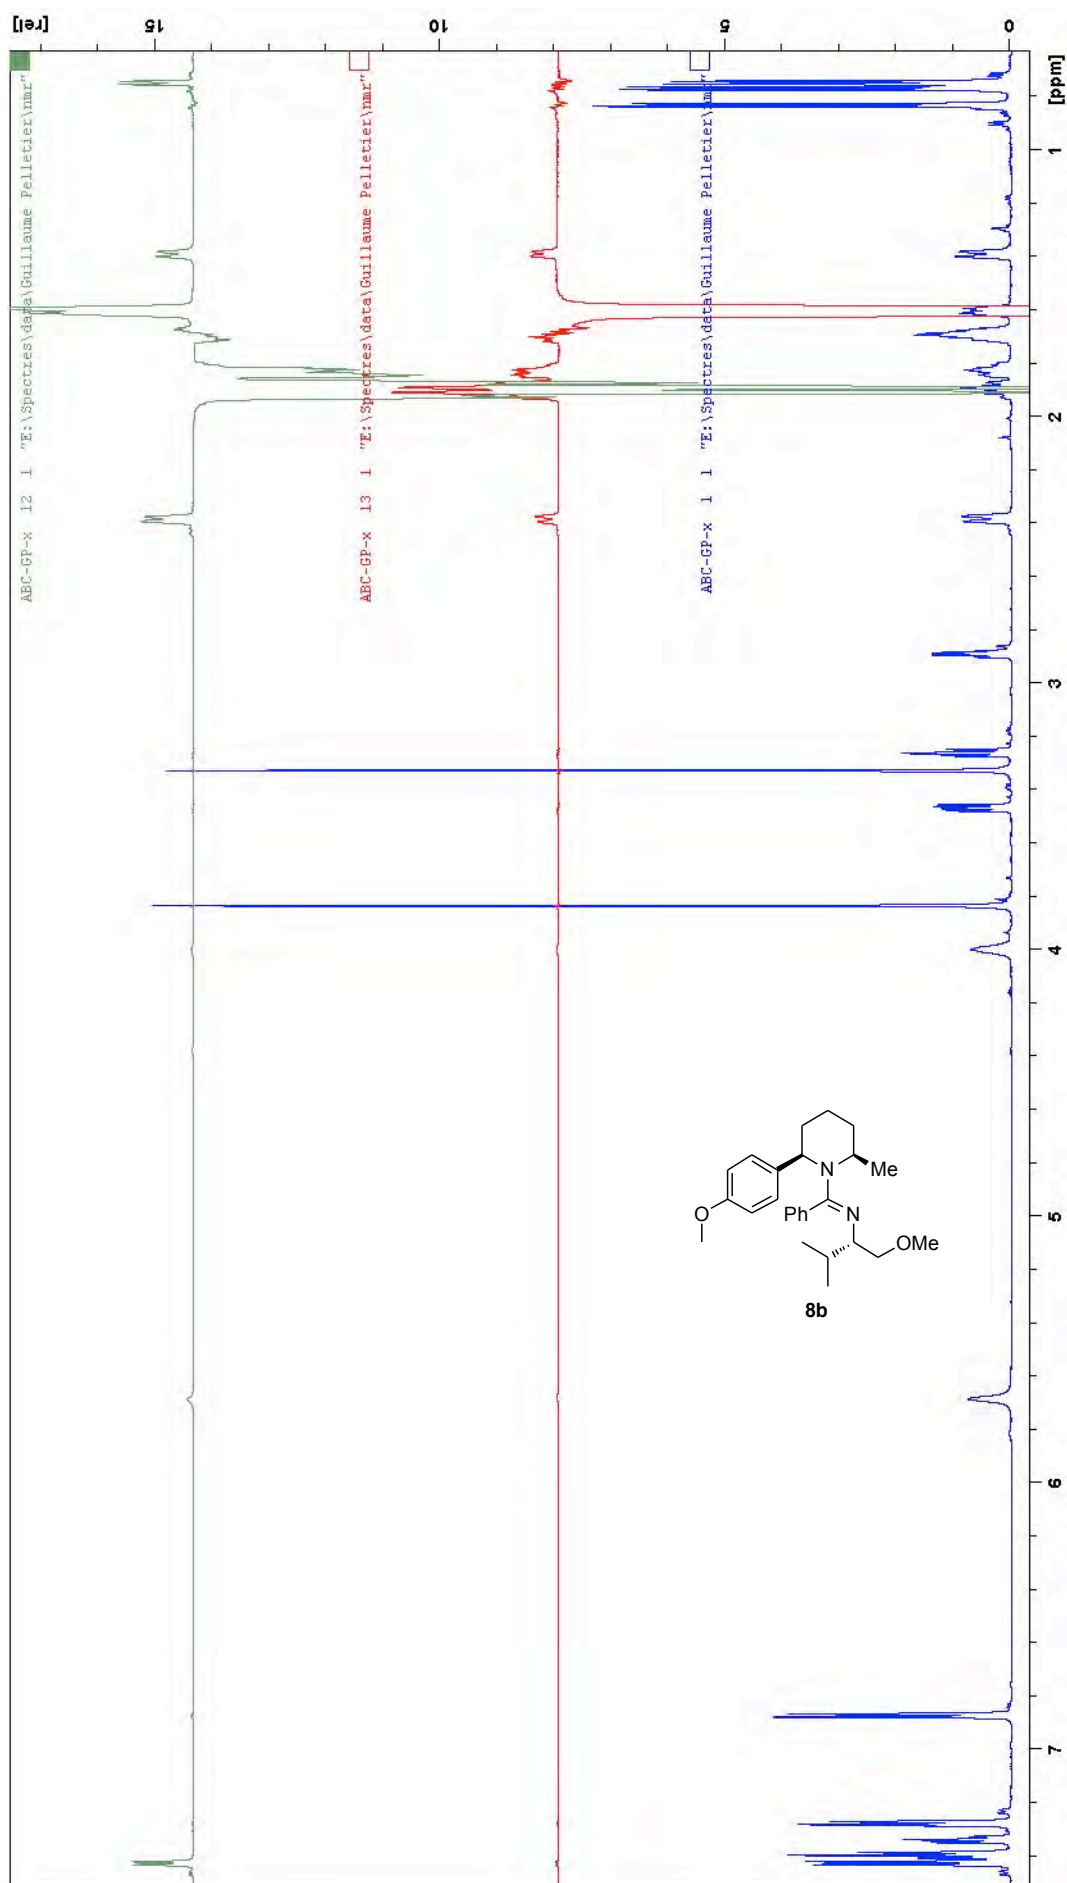

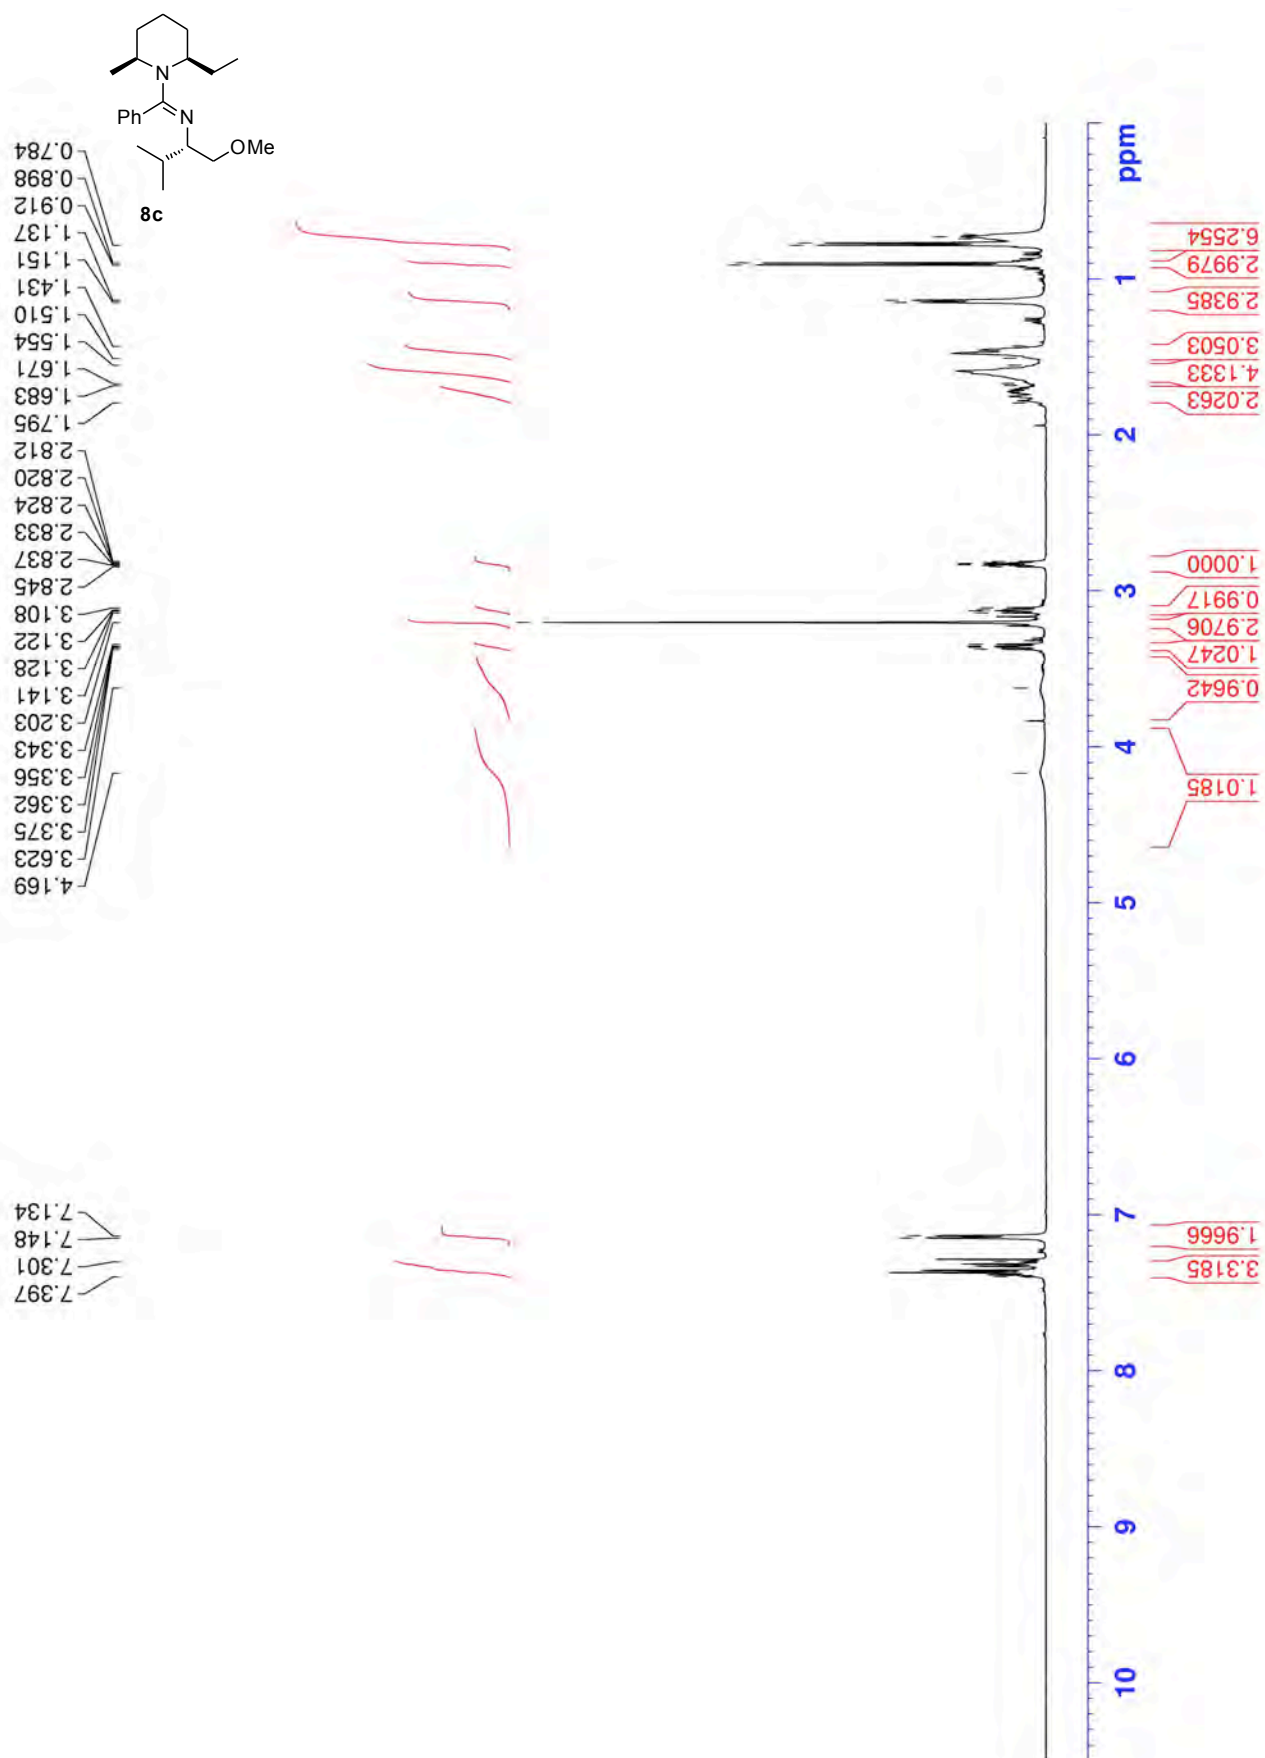

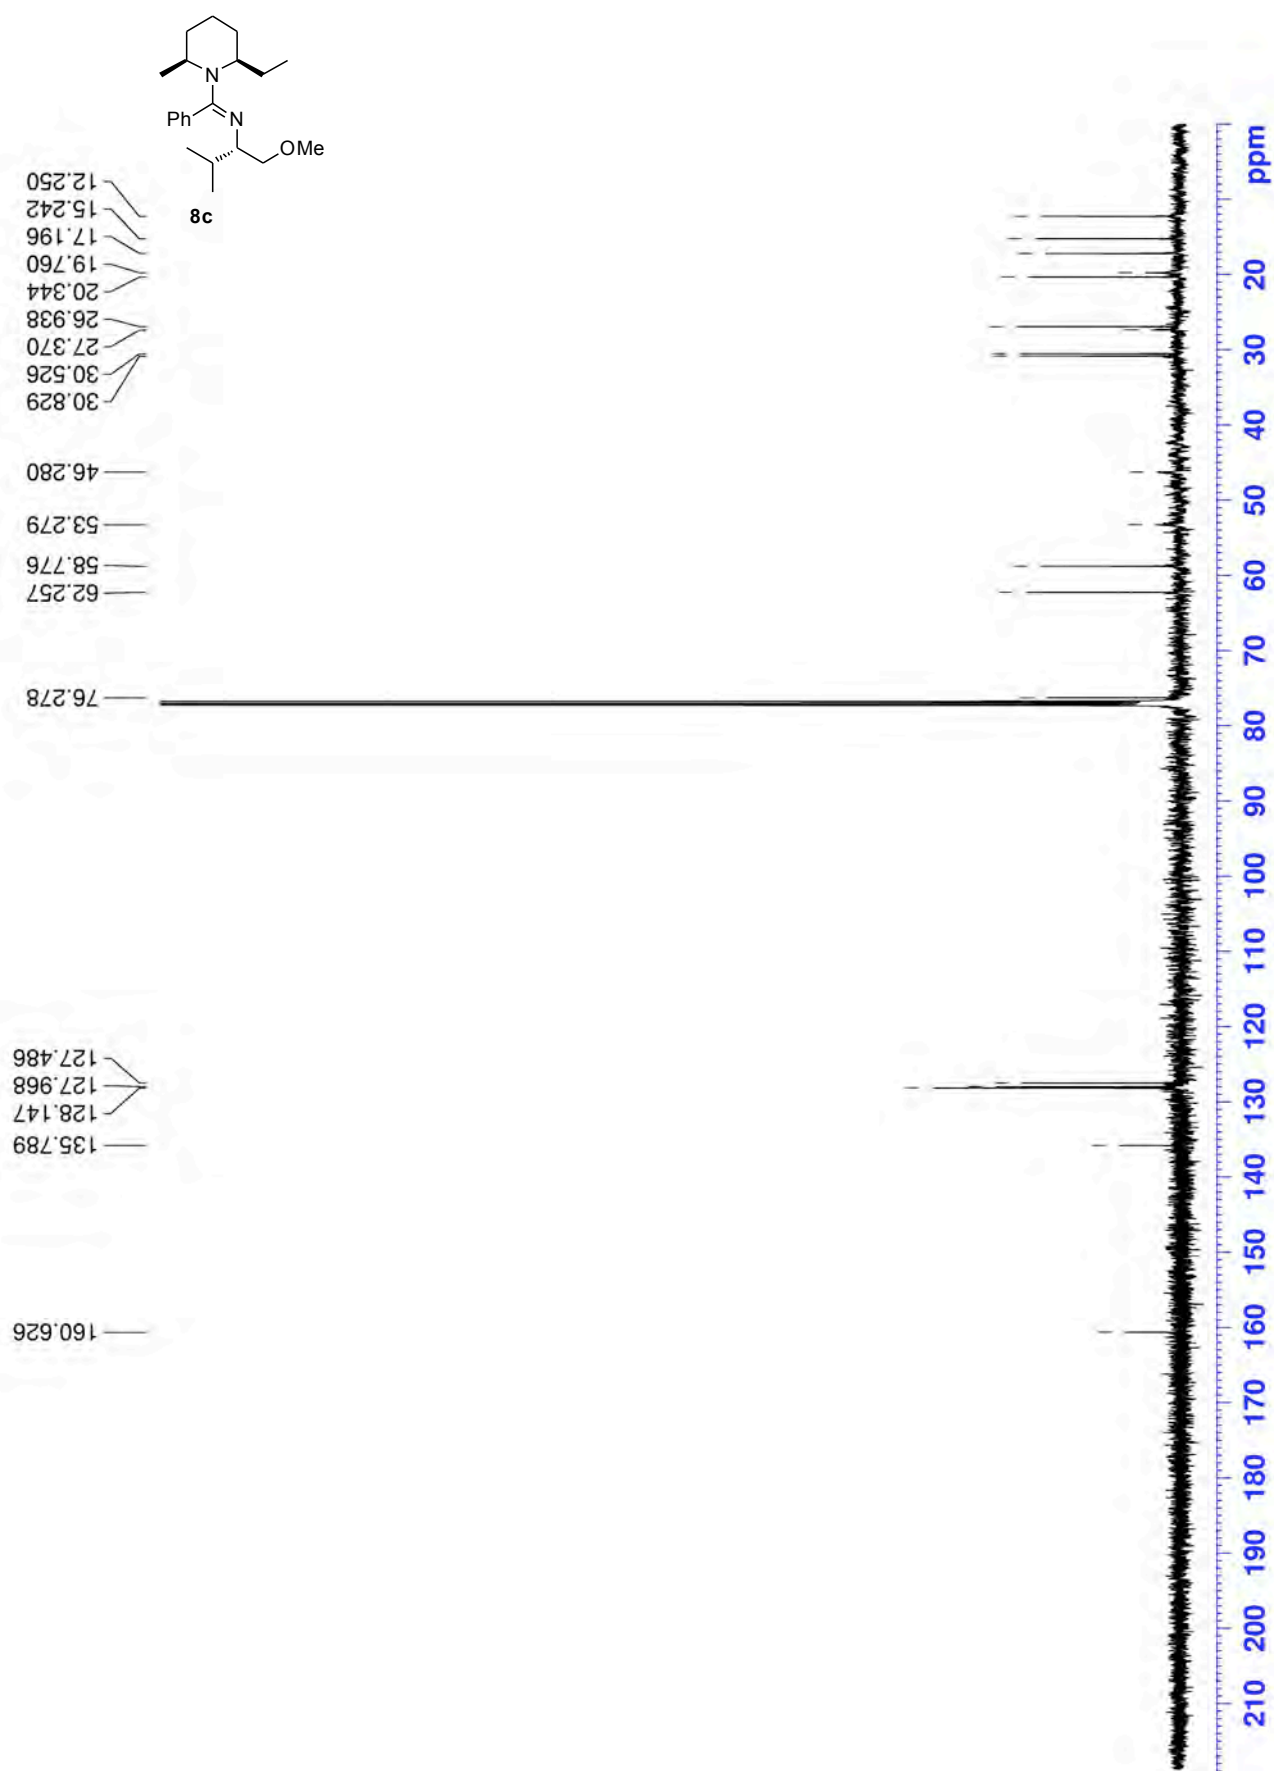

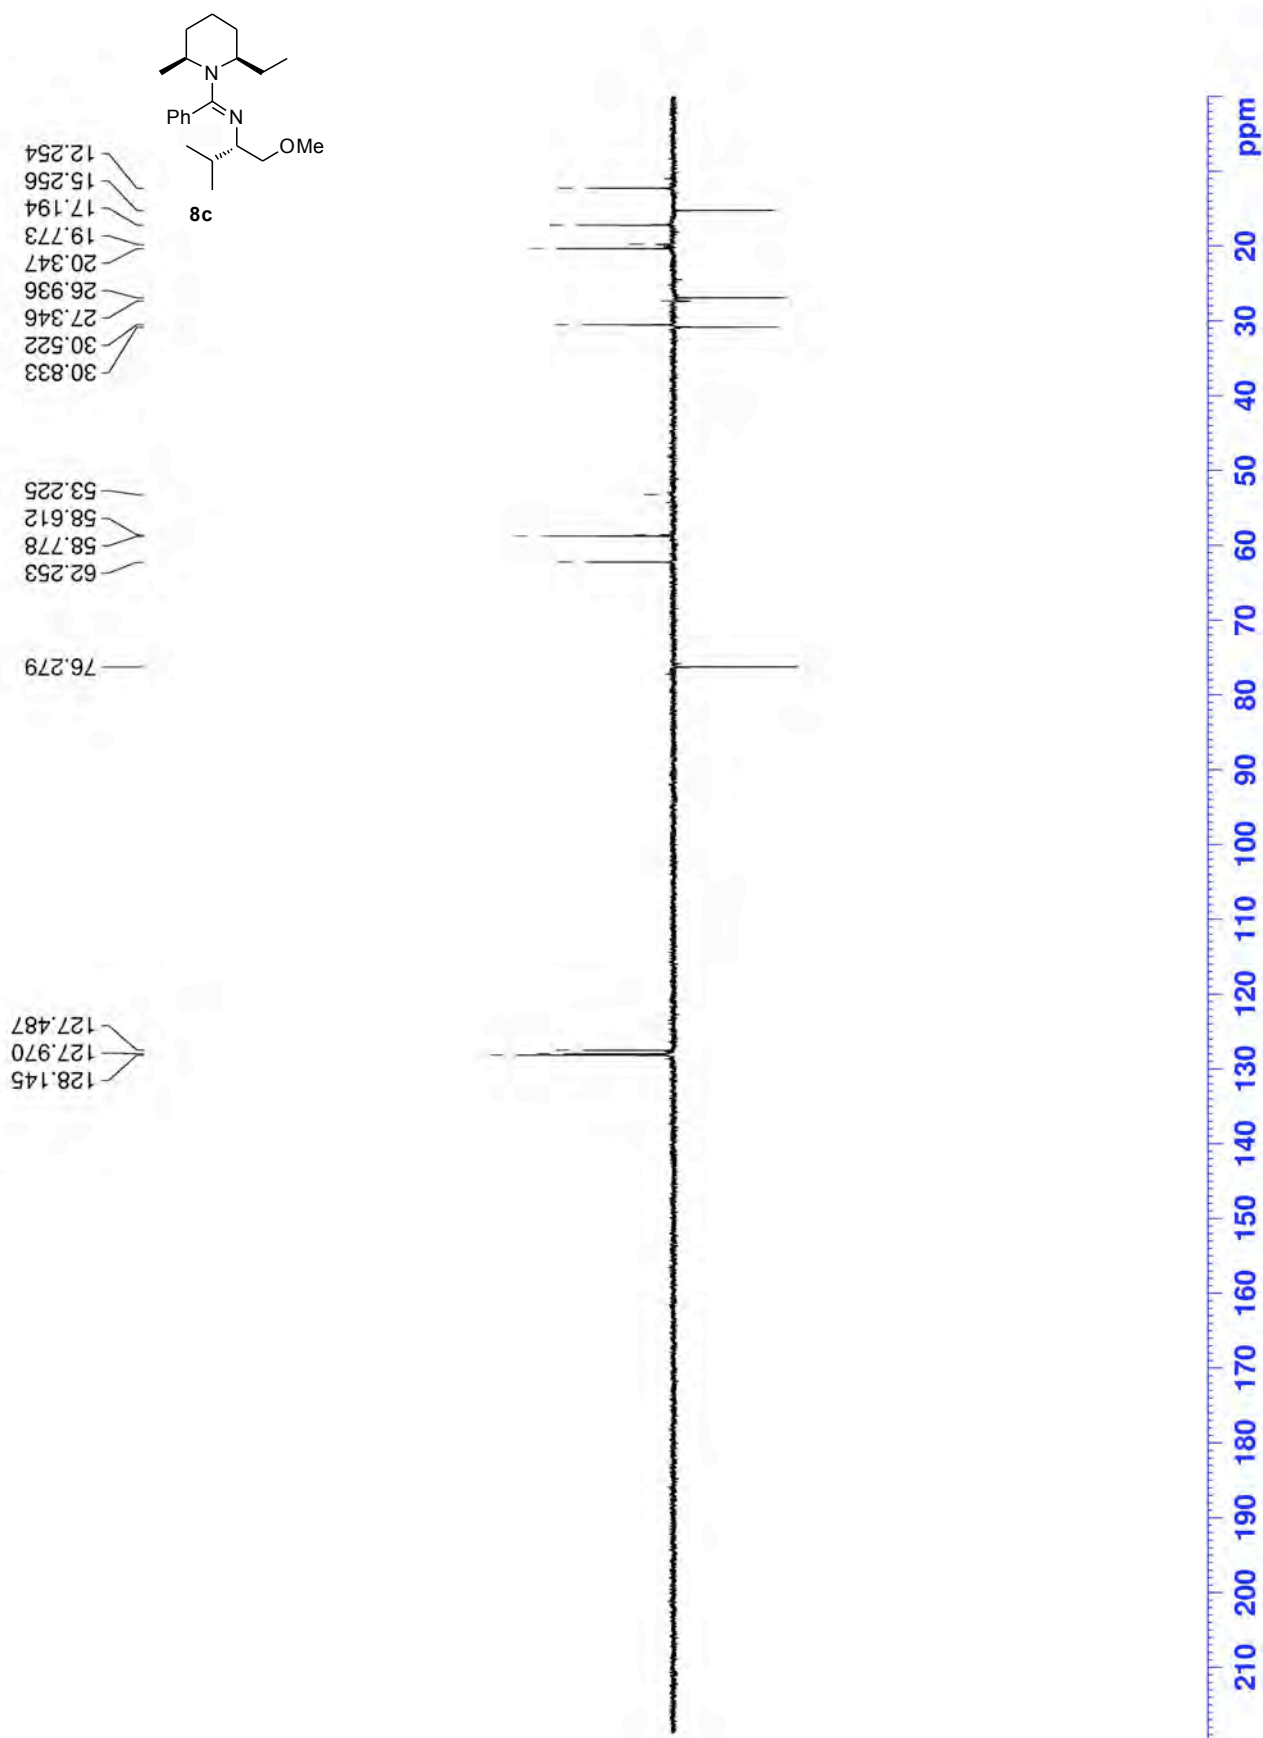

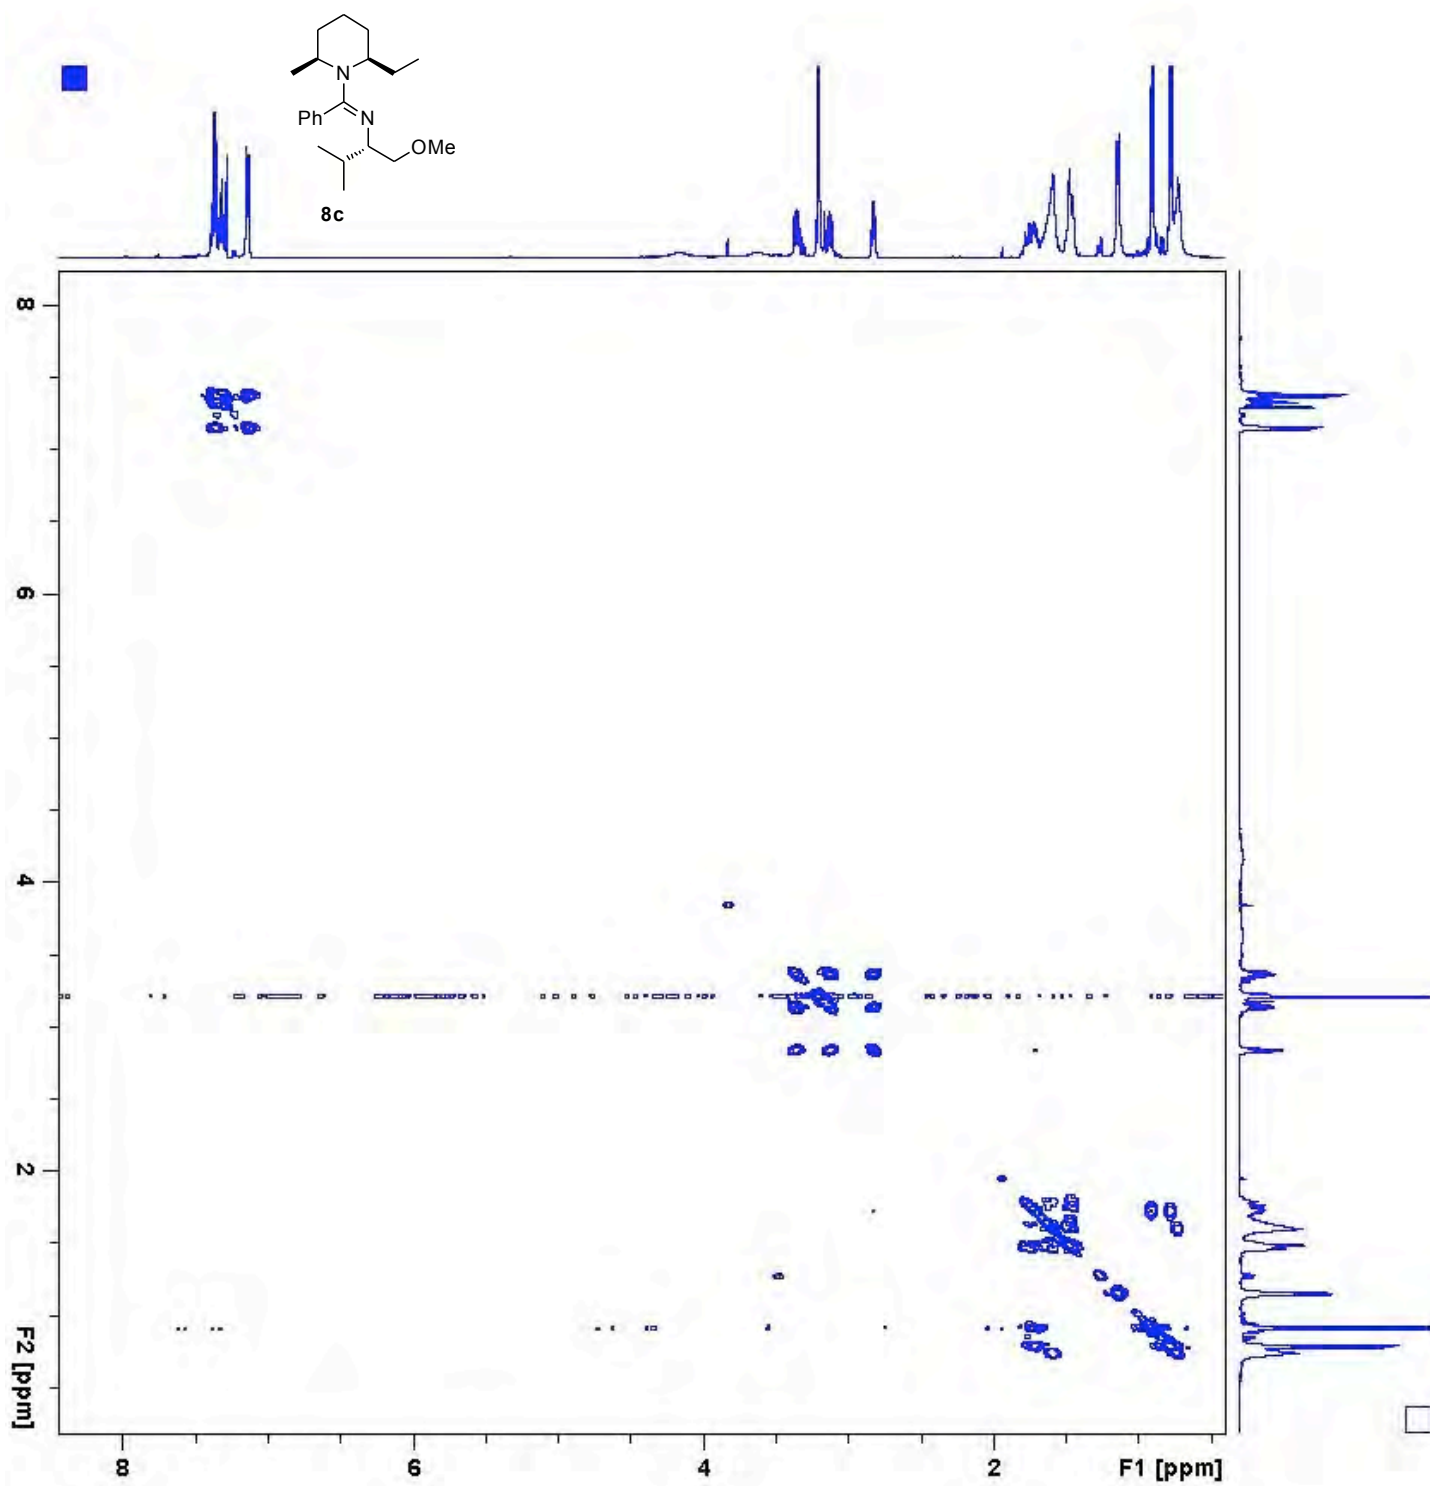

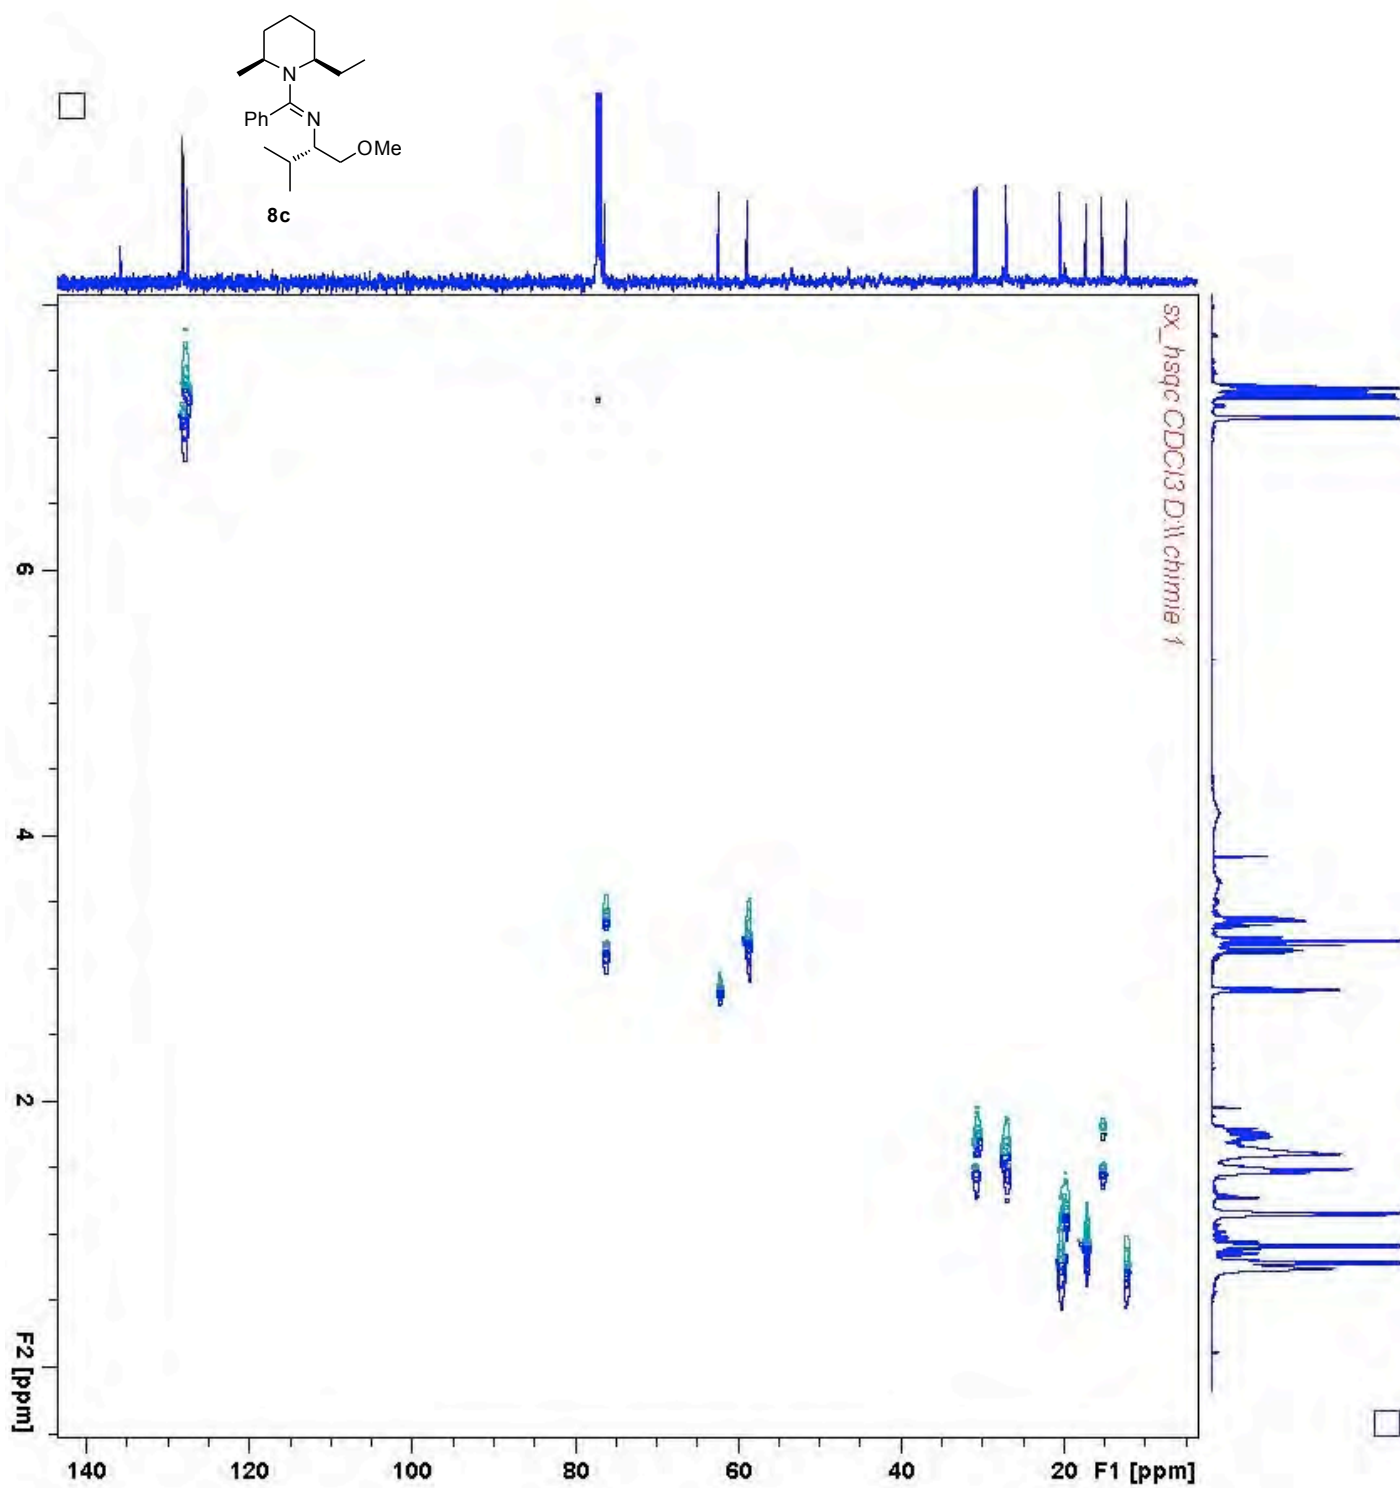

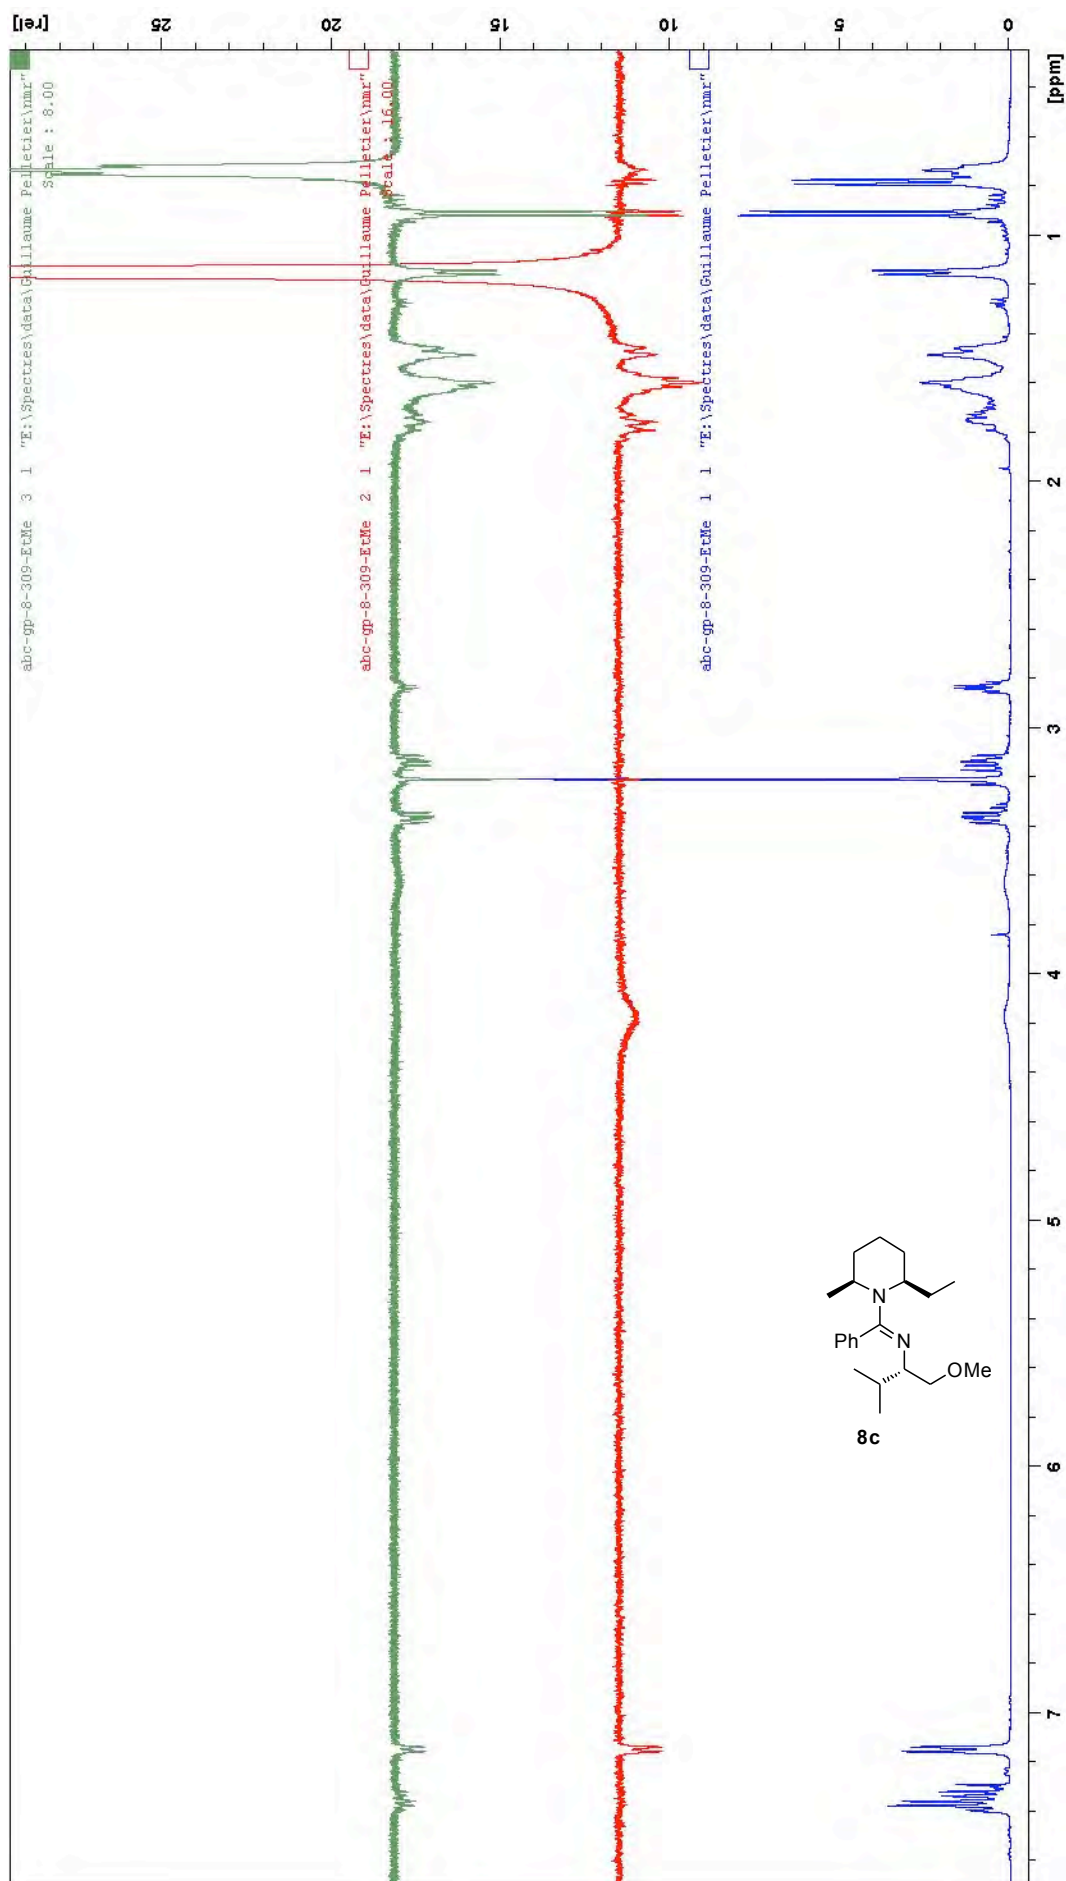

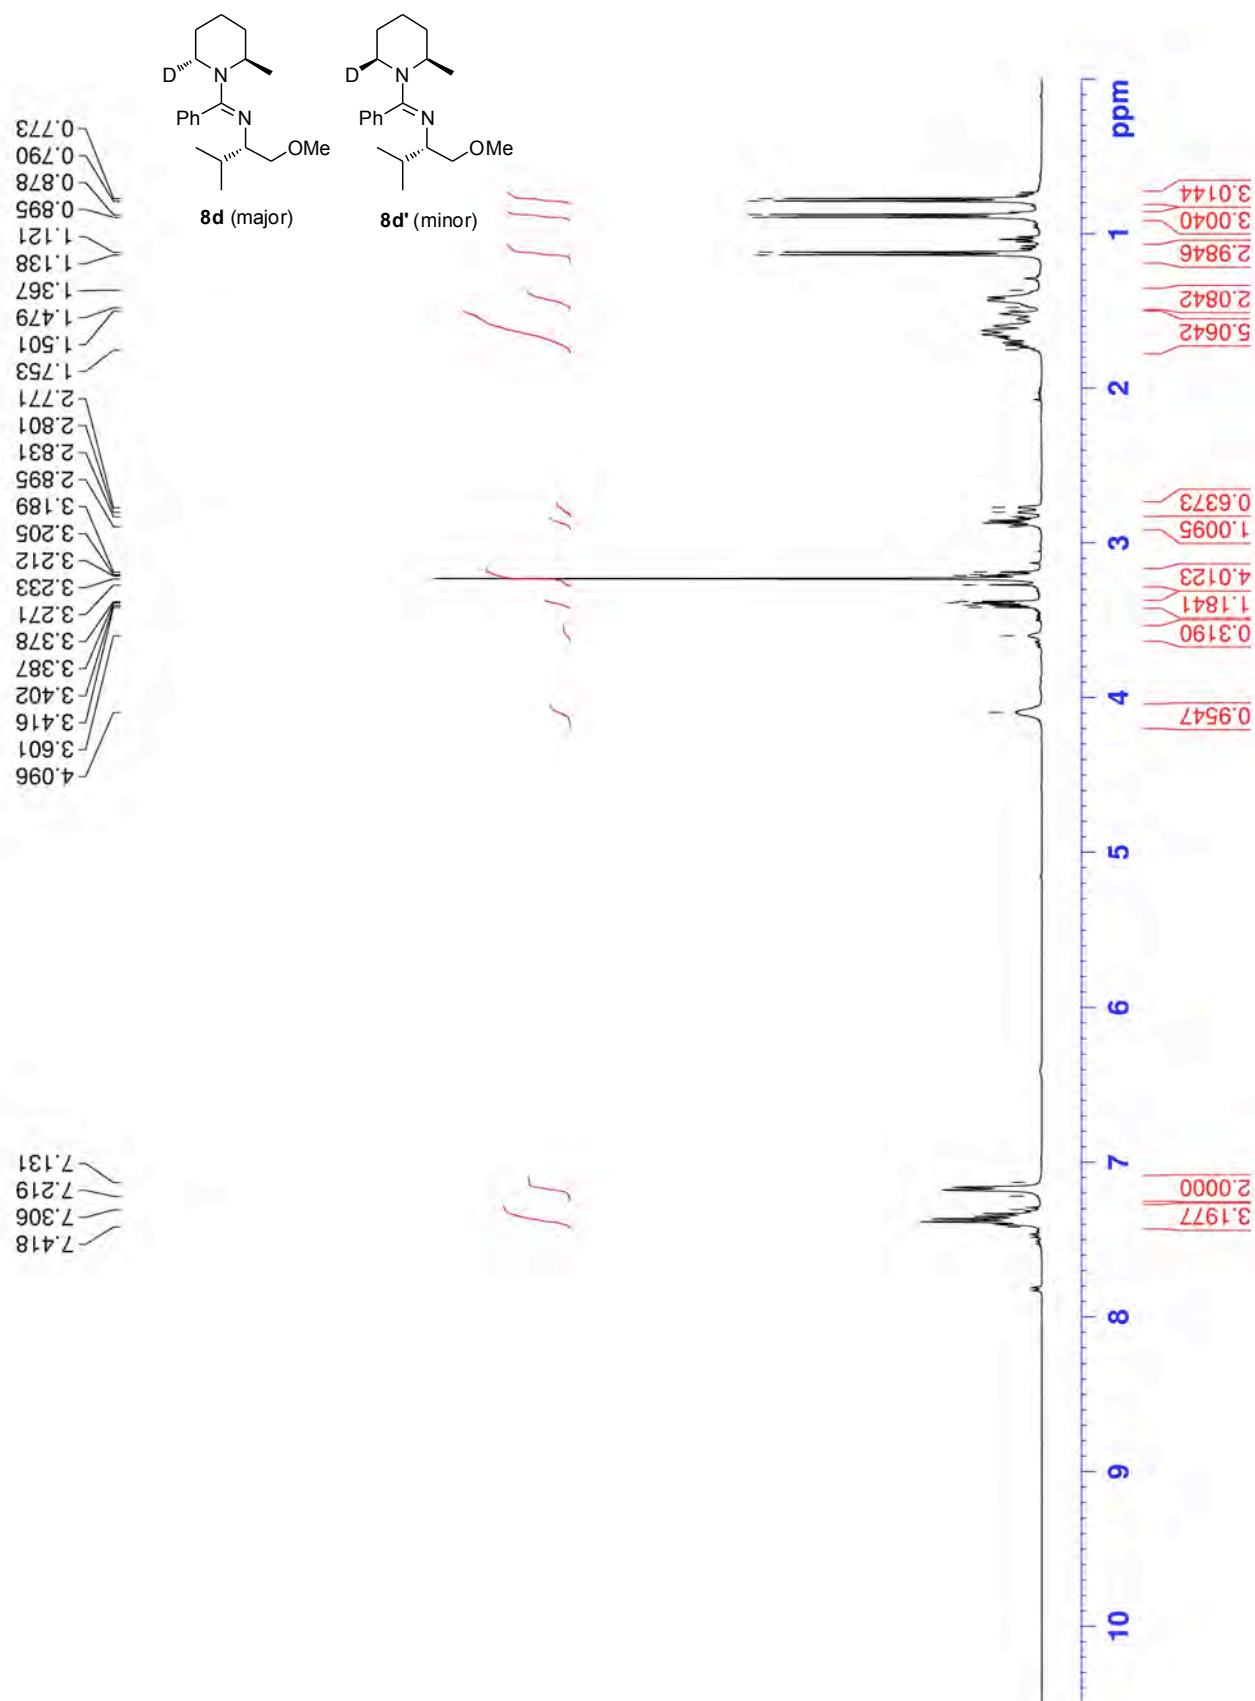



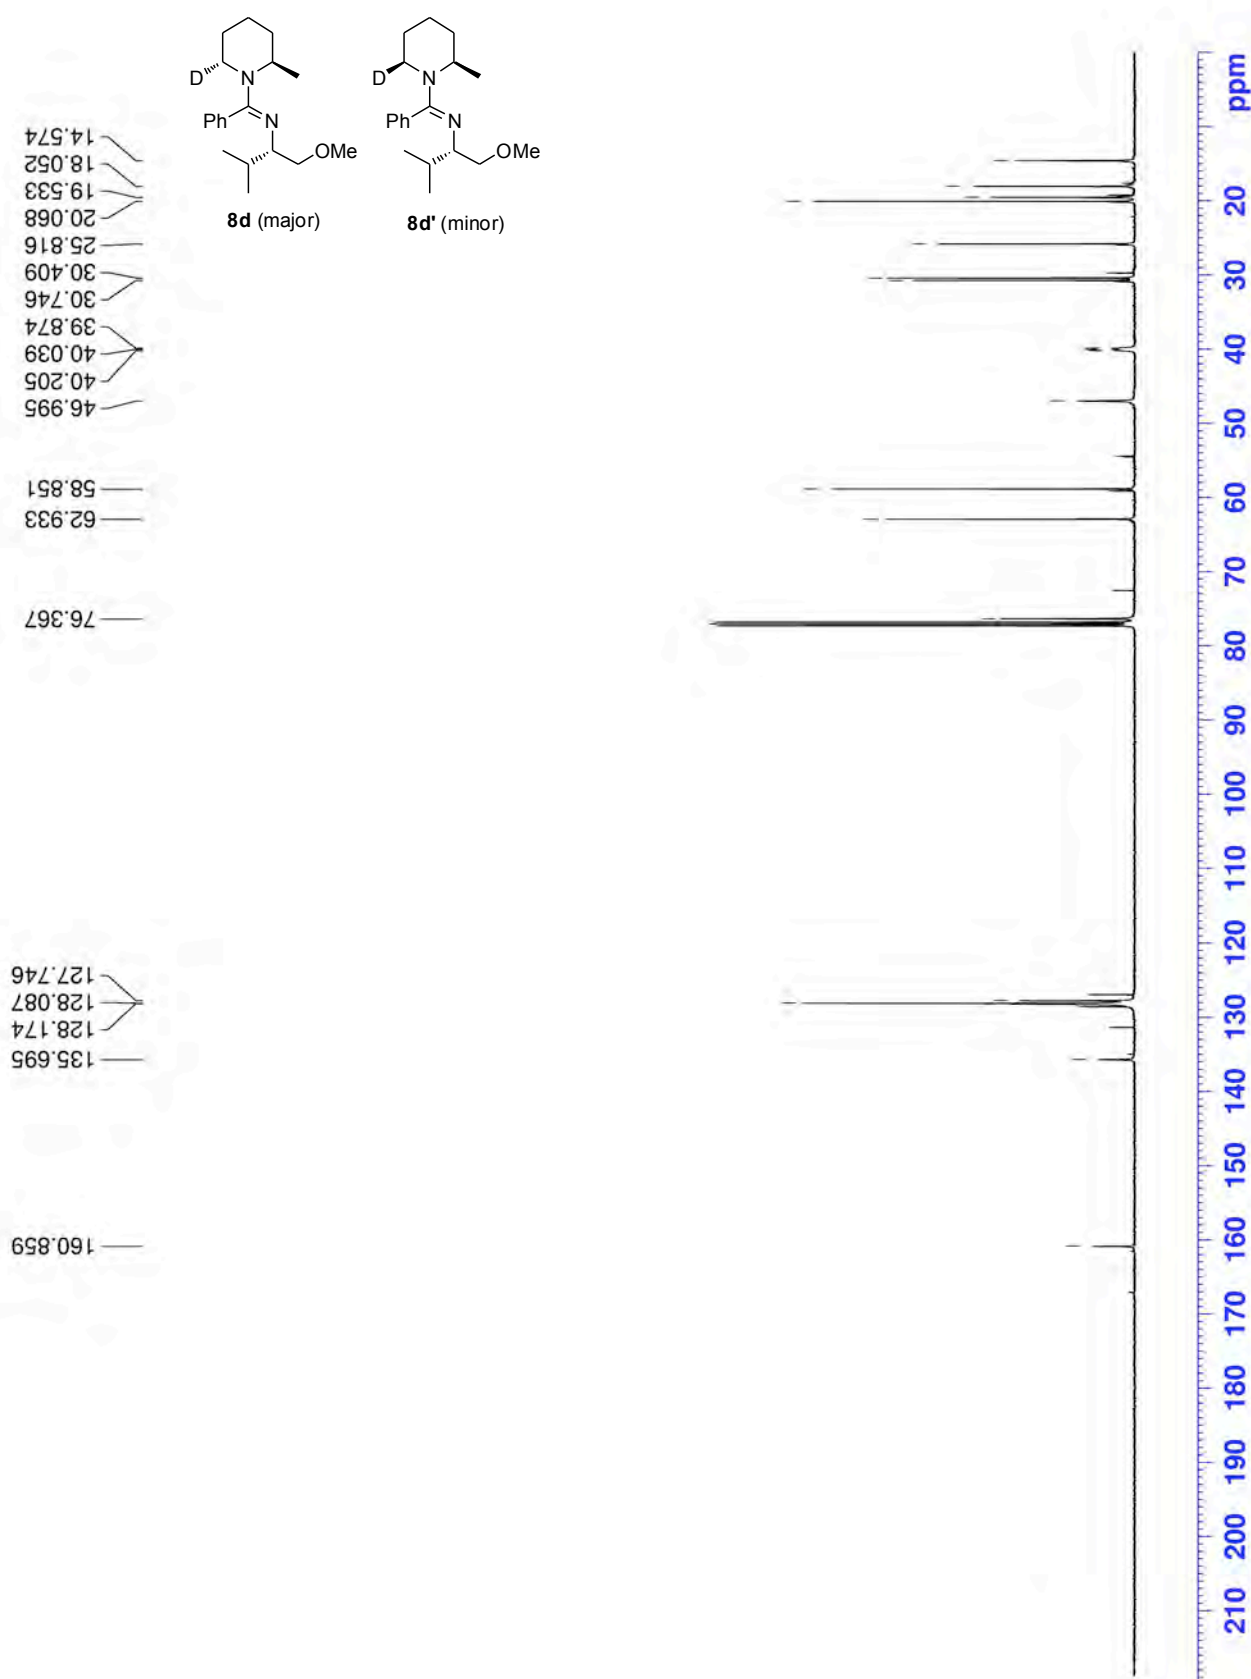

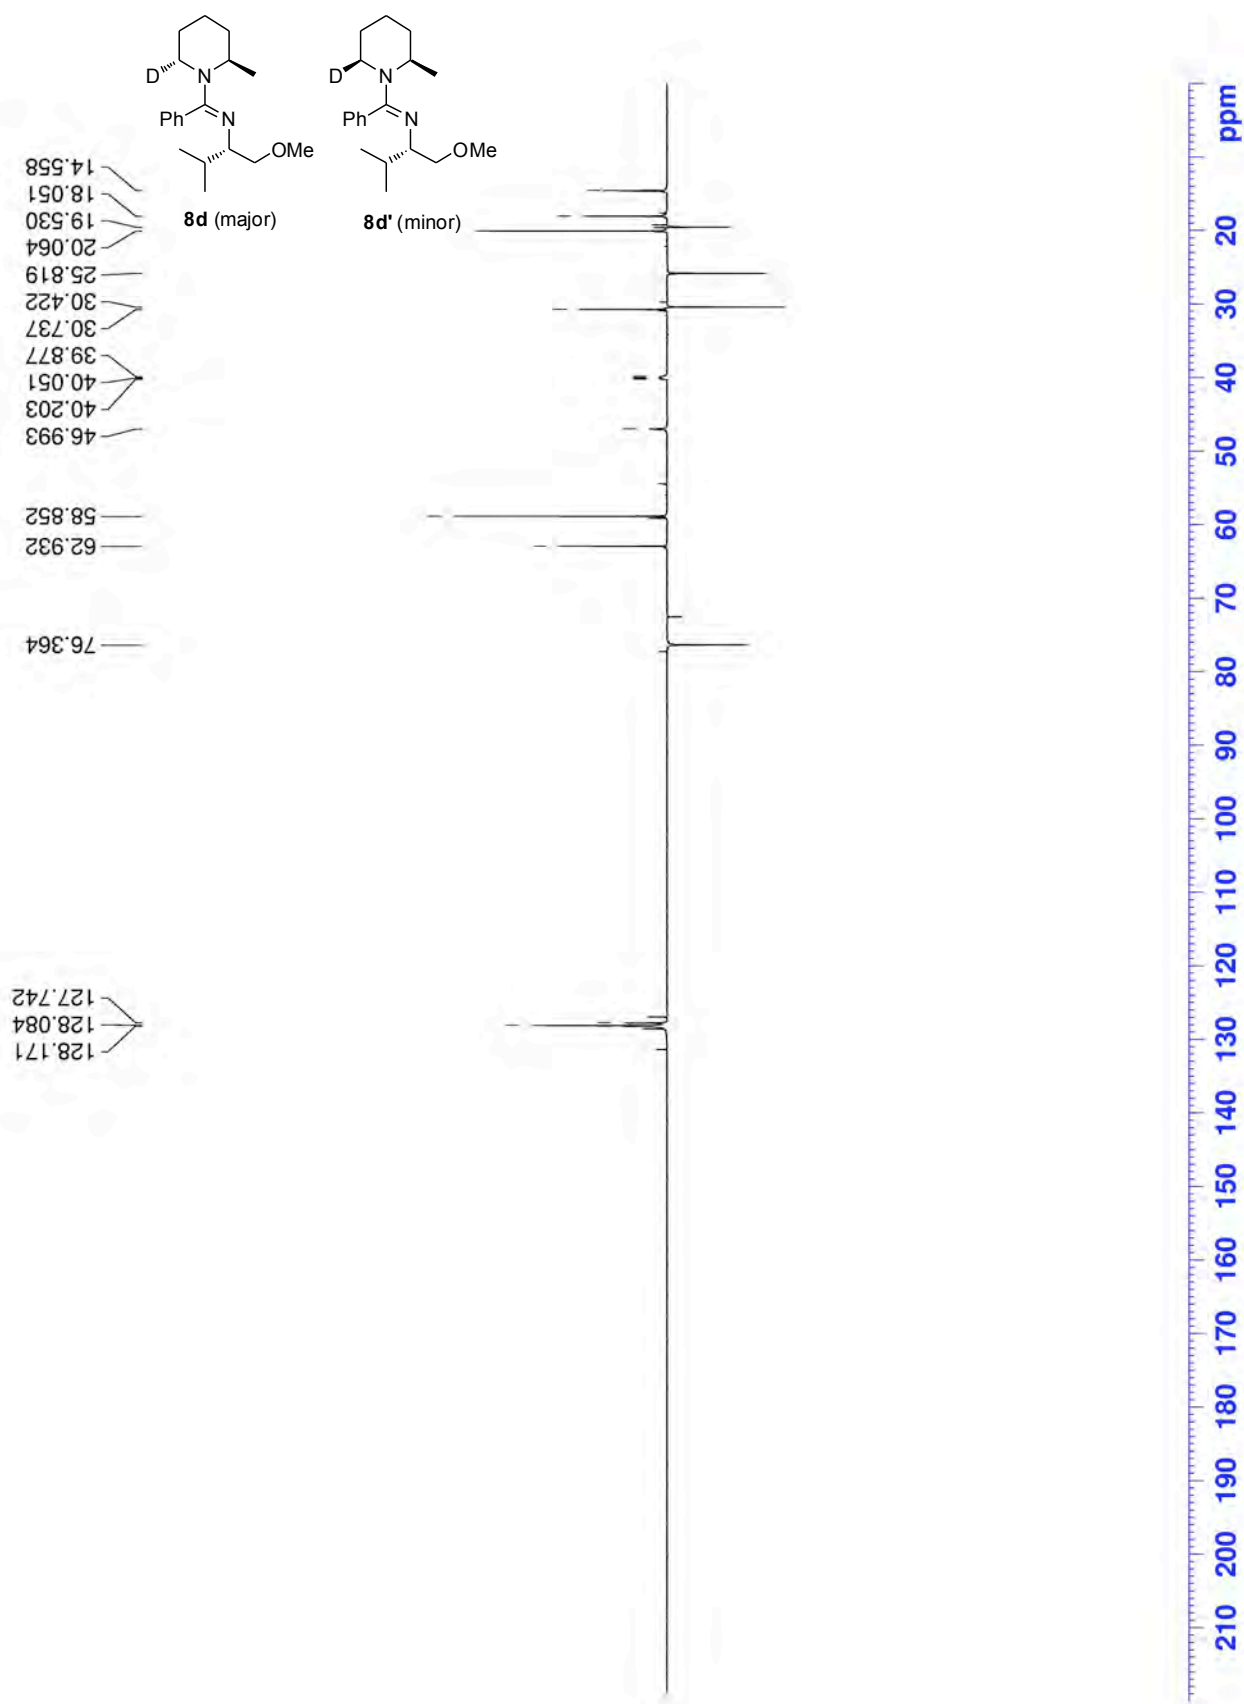

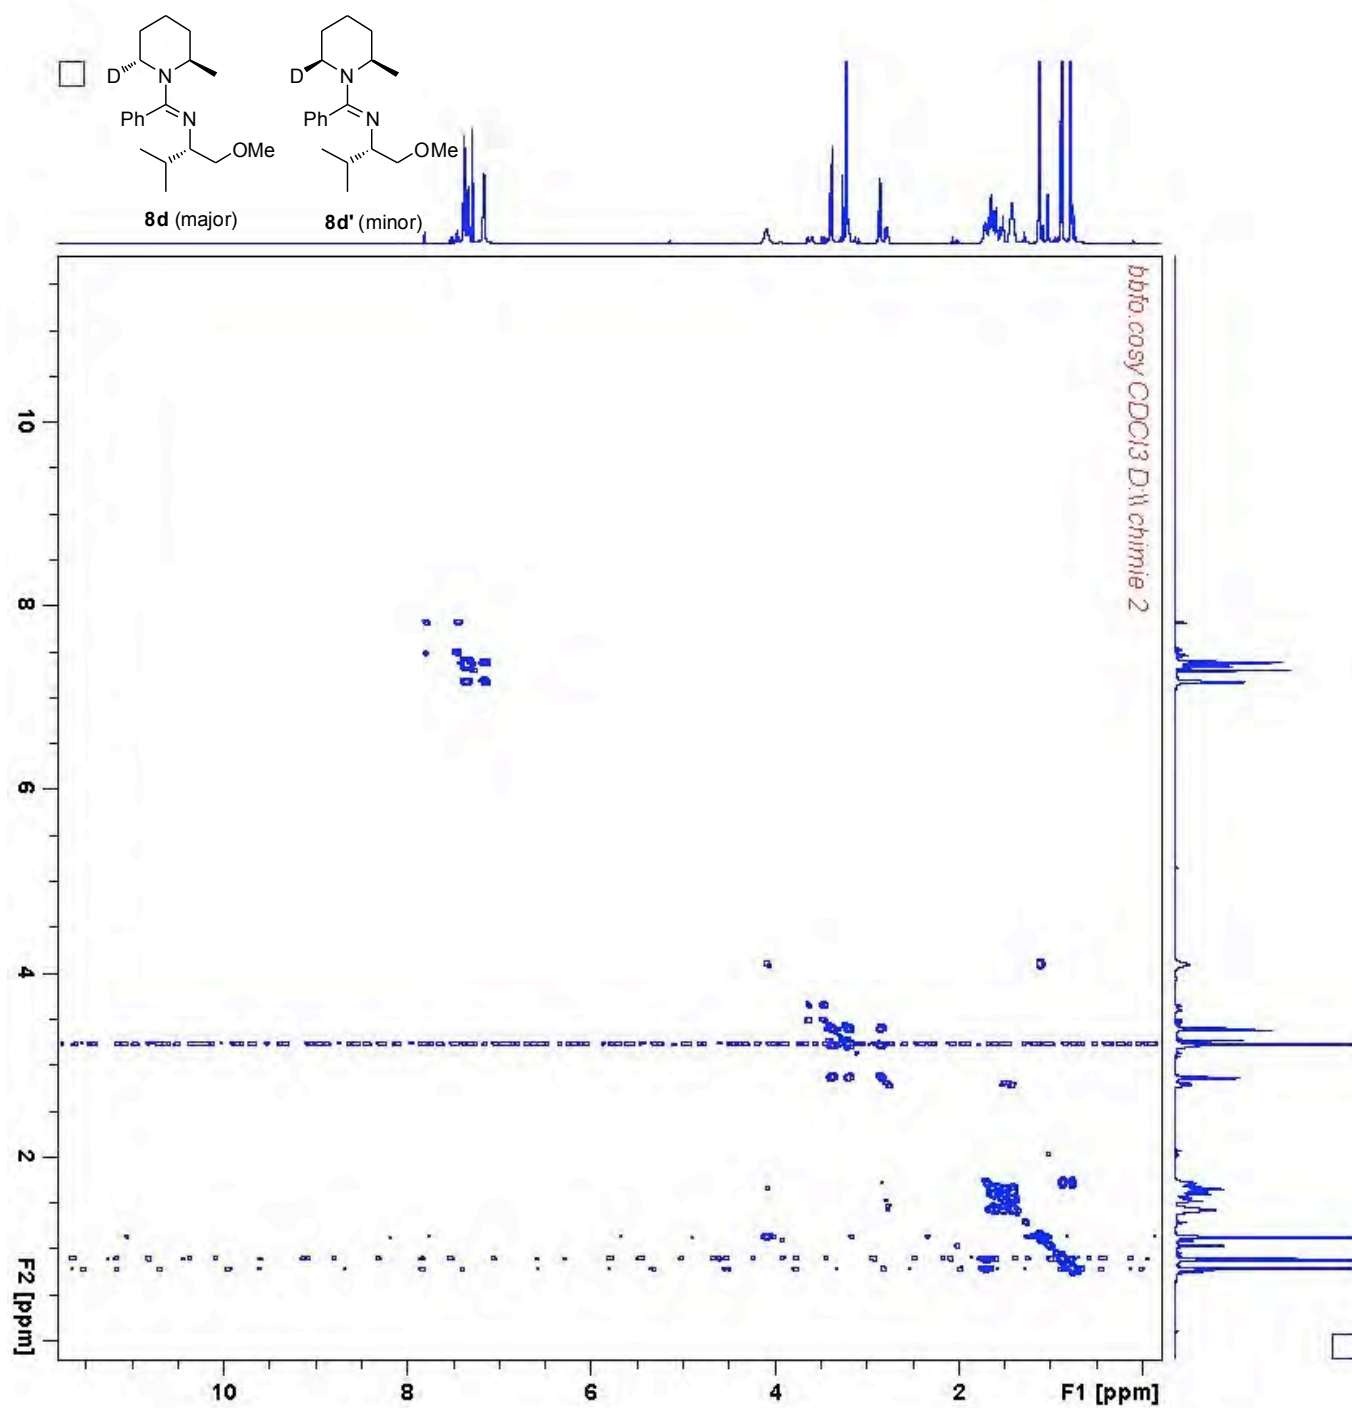

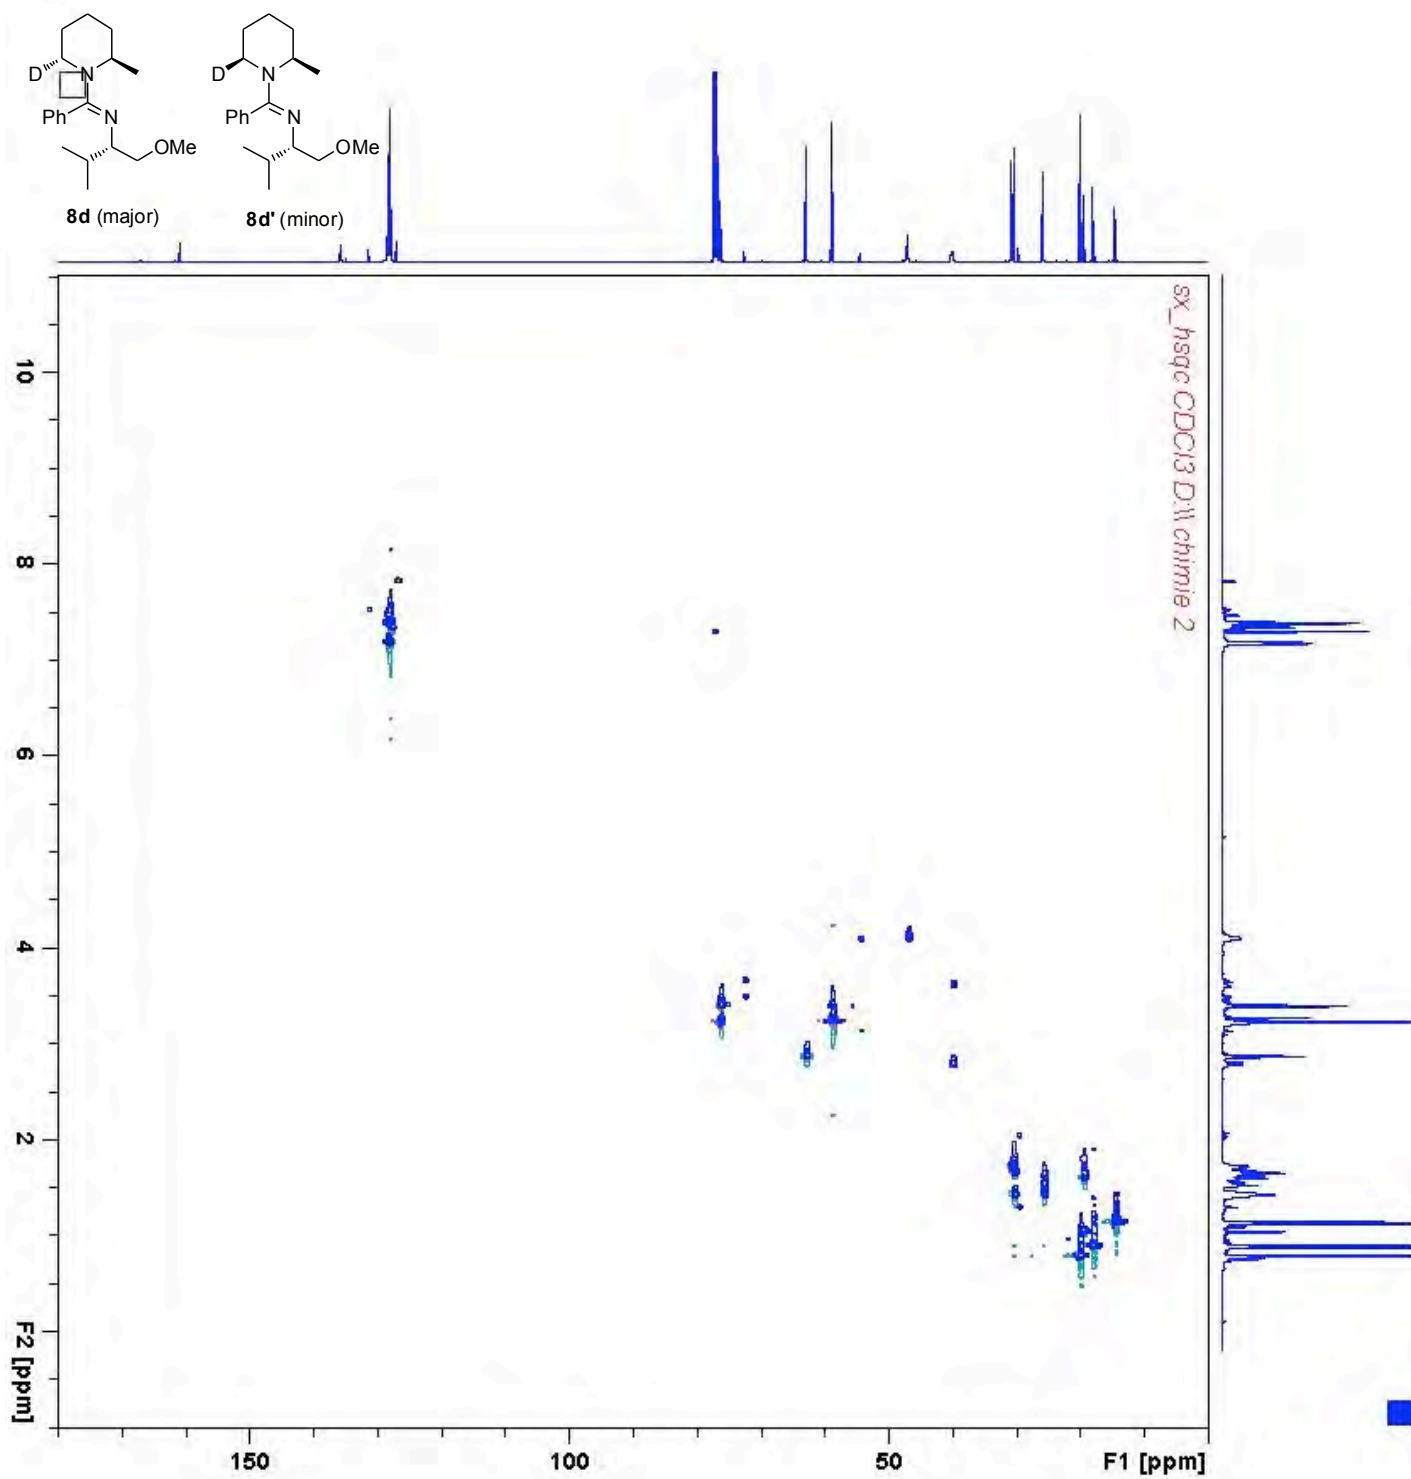

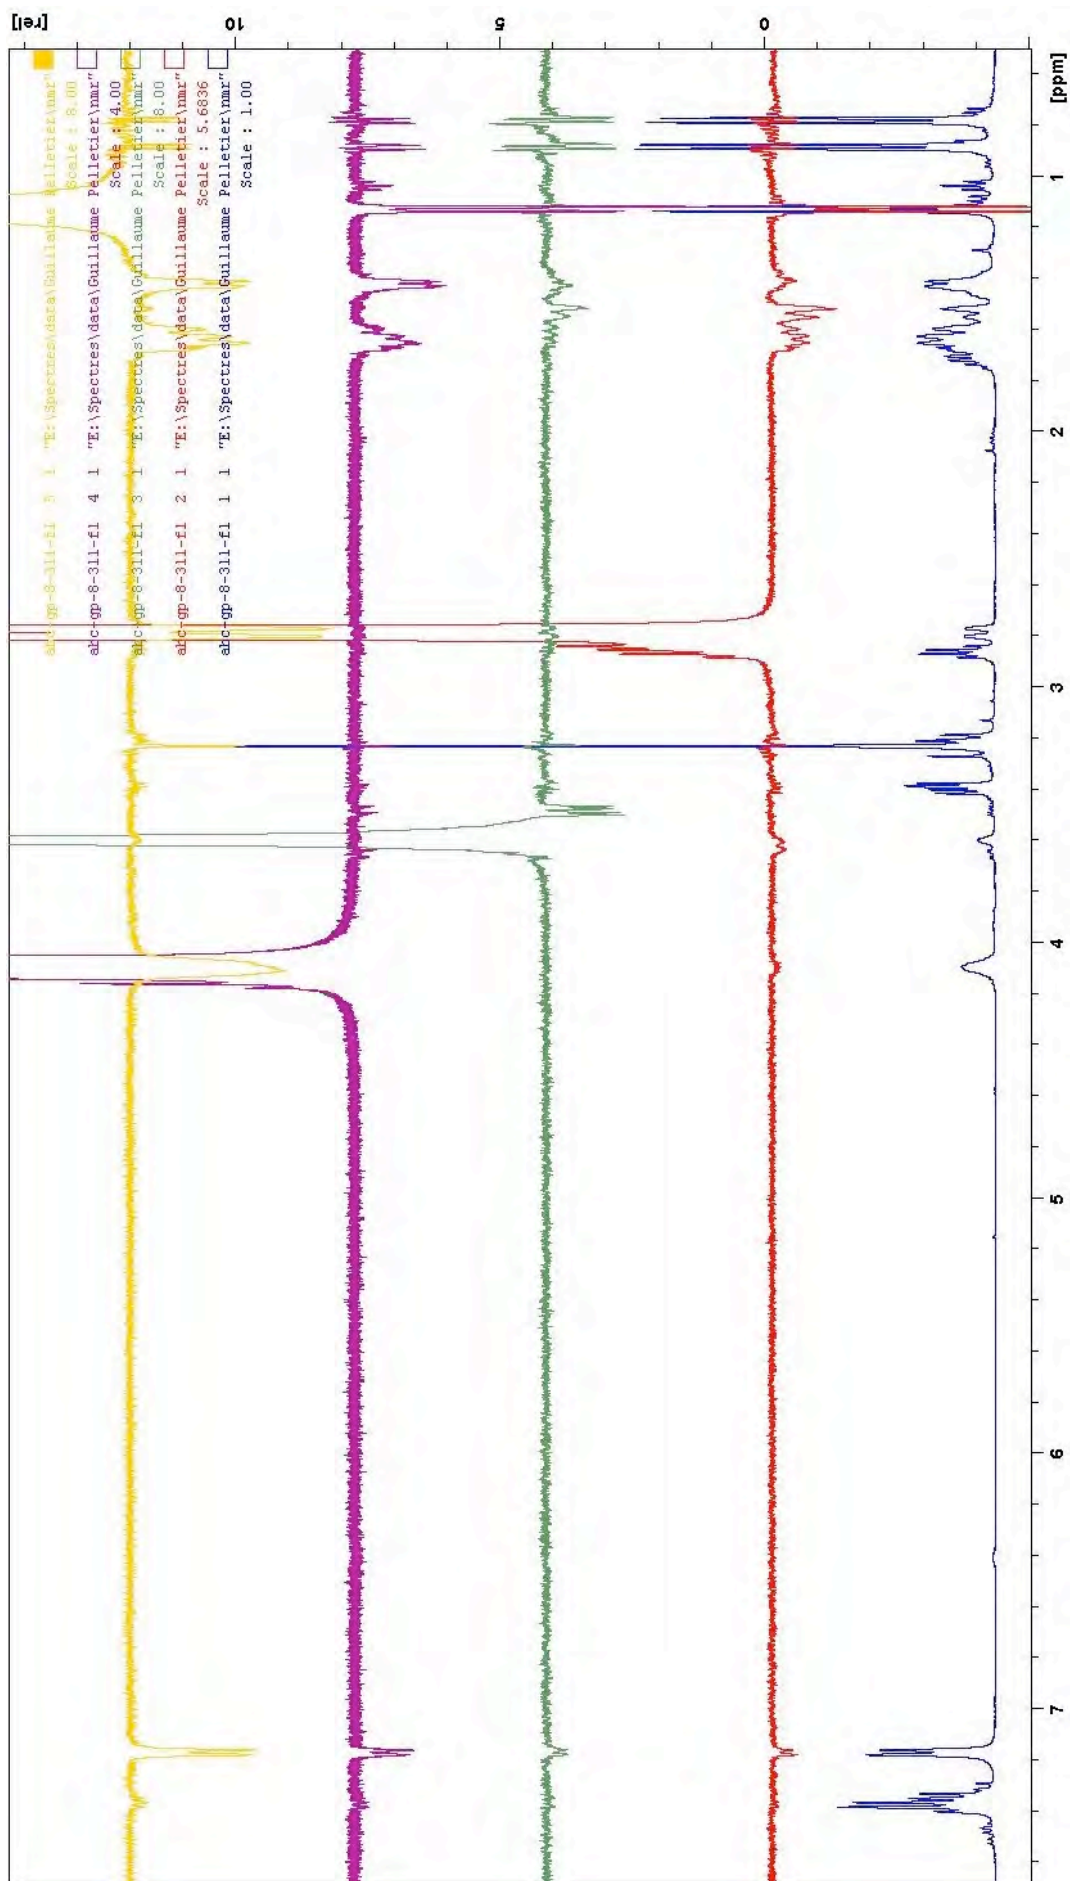

Supplement: c4cc02220c1.pdf [file c4cc02220c1.pdf]
